# Supplementary material for: Chemoproteomic identification of phosphohistidine acceptors: posttranslational activity regulation of a key glycolytic enzyme
Source: Royal Society of Chemistry journal article supplement (doi:10.1039/d5sc01024a), 2025-01-01
Supplement: d5sc01024a2.xlsx [file d5sc01024a2.xlsx]

## Sheet: Results
Significant	-LOG(P-value)	Difference	Gene names	Mol. weight [kDa]	Score	Intensity	MS/MS count	LFQ intensity Me_1	LFQ intensity Me_2	LFQ intensity Me_3	LFQ intensity pPyp_1	LFQ intensity pPyp_2	LFQ intensity pPyp_3	Protein IDs	Protein names
1	6.2473	5.8747	gltA	48.014	323.31	94776000000	1374	22.948	22.8159	22.7538	28.8717	28.5775	28.6926	P0ABH7	Citrate synthase
1	6.40995	4.07016	glmM	47.543	323.31	7172600000	269	20.7229	20.9062	20.7185	24.8791	24.8137	24.8653	P31120	Phosphoglucosamine mutase
1	2.25248	3.32345	pfkA	34.842	257.77	1551400000	102	20.4266	20.5217	18.6633	23.3403	23.0036	23.2382	P0A796	ATP-dependent 6-phosphofructokinase isozyme 1
1	2.66263	3.0616	ppsA	87.434	196.47	315300000	52	17.8496	17.1245	NaN	20.5333	20.7554	20.3573	P23538	Phosphoenolpyruvate synthase
1	4.12874	2.88401	aceE	99.667	323.31	63681000000	1164	24.856	24.8225	24.6268	27.8941	27.3591	27.7041	P0AFG8	Pyruvate dehydrogenase E1 component
1	4.27861	2.55384	rho	47.004	323.31	6856900000	274	22.4382	22.1642	22.2386	24.926	24.609	24.9675	P0AG30	Transcription termination factor Rho
1	4.60103	2.04795	guaB	52.022	323.31	5196600000	206	22.5959	22.5396	22.7361	24.5277	24.7348	24.7529	P0ADG7	Inosine-5-monophosphate dehydrogenase
1	2.37289	1.87367	rpe	24.554	79.601	241500000	21	20.0447	19.958	19.9363	21.4007	21.6925	22.4669	P0AG07	Ribulose-phosphate 3-epimerase
1	3.65873	1.7801	nrdA	85.774	323.31	2874100000	222	21.2507	21.2467	21.349	22.9353	22.9178	23.3336	P00452	Ribonucleoside-diphosphate reductase 1 subunit alpha
1	2.62405	1.75635	pssA	52.801	175.71	401860000	46	20.0293	19.5753	20.3124	21.5878	21.5893	22.0089	P23830	CDP-diacylglycerol--serine O-phosphatidyltransferase
1	4.43386	1.74934	gltX	53.815	323.31	2607400000	178	21.635	21.585	21.3757	23.2379	23.3538	23.252	P04805	Glutamate--tRNA ligase
1	3.10683	1.74829	rpsJ	11.735	100.89	18188000000	233	25.7199	25.703	25.9518	27.8561	27.2615	27.502	P0A7R5	30S ribosomal protein S10
1	3.55866	1.74757	pykA	51.357	323.31	2358100000	148	21.7844	21.693	21.3816	23.2581	23.3214	23.5222	P21599	Pyruvate kinase II
1	4.15941	1.73898	ndk	15.463	134.03	957590000	66	21.7323	21.58	21.6588	23.3645	23.2548	23.5687	P0A763	Nucleoside diphosphate kinase
1	4.11356	1.69157	groL	57.328	323.31	43099000000	1058	25.5894	25.7696	25.6127	27.2878	27.5162	27.2425	P0A6F5	60 kDa chaperonin
1	4.80589	1.62916	adhE	96.126	323.31	12511000000	471	22.9306	22.8987	22.8845	24.4139	24.6336	24.5539	P0A9Q7	Aldehyde-alcohol dehydrogenase;Alcohol dehydrogenase;Acetaldehyde dehydrogenase [acetylating];Pyruvate-formate-lyase deactivase
1	4.30142	1.4772	sucC	41.392	323.31	2827600000	113	22.3834	22.456	22.5071	23.7842	24.0077	23.9862	P0A836	Succinyl-CoA ligase [ADP-forming] subunit beta
1	4.43525	1.35326	tsf	30.423	323.31	13862000000	396	24.7736	24.756	24.6944	26.1858	26.1247	25.9733	P0A6P1	Elongation factor Ts
1	3.22325	1.34663	fruB	39.647	214.14	250500000	37	19.523	19.961	19.6405	21.0152	21.1346	21.0145	P69811	Multiphosphoryl transfer protein;Phosphocarrier protein HPr;Fructose-specific phosphotransferase enzyme IIA component
1	4.81025	1.25336	clpB	95.584	323.31	2982200000	247	21.913	21.8725	21.893	23.1004	23.0941	23.2441	P63284	Chaperone protein ClpB
1	3.53228	1.22725	ptsI	63.561	323.31	3957400000	215	22.5921	22.7463	22.7333	24.0431	23.74	23.9704	P08839	Phosphoenolpyruvate-protein phosphotransferase
1	4.65159	7.57137	metL	88.887	323.31	1907000000	152	14.9915	15.3671	15.4888	23.3927	22.3636	22.8052	P00562	Bifunctional aspartokinase/homoserine dehydrogenase 2;Aspartokinase;Homoserine dehydrogenase
1	3.2464	6.8434	proC	28.145	266.29	1796800000	98	16.7627	17.4735	NaN	24.4089	23.4775	23.998	P0A9L8	Pyrroline-5-carboxylate reductase
1	3.94783	6.28704	ribF	34.734	320.4	1132300000	62	17.0071	16.4781	15.5972	22.7854	22.5663	22.5919	P0AG40	Riboflavin biosynthesis protein RibF;Riboflavin kinase;FMN adenylyltransferase
1	3.69173	6.12063	cysE	29.316	314.78	1572500000	82	17.2107	NaN	17.6985	23.8985	23.3923	23.4349	P0A9D4	Serine acetyltransferase
1	5.26937	5.59198	deoA	47.207	323.31	4704300000	198	18.795	18.8899	19.0931	24.5194	24.2606	24.774	P07650	Thymidine phosphorylase
1	5.80313	5.31609	upp	22.533	323.31	72451000000	1128	23.5235	23.3679	23.5025	28.9687	28.5874	28.786	P0A8F0	Uracil phosphoribosyltransferase
1	3.29069	5.24171	maeA	63.197	323.31	1112700000	88	16.4406	17.7264	18.0256	22.8238	22.3214	22.7725	P26616	NAD-dependent malic enzyme
1	2.90009	5.14768	ubiB	63.202	203.35	675340000	80	17.3053	15.2646	16.7519	21.6274	21.261	21.8764	P0A6A0	Probable protein kinase UbiB
1	4.78502	5.12756	prs	34.218	323.31	10964000000	330	20.9518	20.5464	20.3813	25.9121	25.8371	25.513	P0A717	Ribose-phosphate pyrophosphokinase
1	1.43137	5.03588	murQ	31.22	323.31	6596300000	326	19.1882	18.7979	NaN	26.1819	22.7845	23.1203	P76535	N-acetylmuramic acid 6-phosphate etherase
1	3.13897	5.0256	tyrB	43.537	191.46	628590000	49	16.6874	17.6237	NaN	22.1681	22.1894	22.186	P04693	Aromatic-amino-acid aminotransferase
1	2.8496	4.7831	kdsD	35.196	323.31	2750900000	108	NaN	20.0042	18.9316	24.1362	24.189	24.4278	P45395	Arabinose 5-phosphate isomerase KdsD
1	3.04899	4.70657	srlD	27.858	183.73	1756400000	55	20.2327	18.4039	19.3875	24.1001	24.0954	23.9483	P05707	Sorbitol-6-phosphate 2-dehydrogenase
1	3.37847	4.684	glpX	35.852	141.07	519450000	48	17.5507	16.3939	17.337	21.2815	22.0666	21.9854	P0A9C9	Fructose-1,6-bisphosphatase 1 class 2
1	2.90084	4.63906	galF	32.829	323.31	1364300000	72	19.2668	17.7839	19.3306	23.3134	23.9452	23.0399	P0AAB6	UTP--glucose-1-phosphate uridylyltransferase
1	5.36309	4.4299	ffh	49.787	323.31	1826800000	109	19.709	19.4277	19.7157	24.0387	23.8998	24.2037	P0AGD7	Signal recognition particle protein
1	3.80347	4.40515	plsB	91.38	323.31	1609500000	138	17.7015	18.4872	17.5918	22.2042	22.1669	22.6248	P0A7A7	Glycerol-3-phosphate acyltransferase
1	4.30691	4.38733	ribB	23.353	264.84	1333800000	88	19.2088	18.8692	18.607	23.574	23.0256	23.2474	P0A7J0	3,4-dihydroxy-2-butanone 4-phosphate synthase
1	3.9106	4.38528	folC	45.405	130.09	286890000	45	16.0277	16.244	16.9738	20.6472	20.9185	20.8356	P08192	Bifunctional protein FolC;Folylpolyglutamate synthase;Dihydrofolate synthase
1	1.86702	4.24529	pncB	45.897	323.31	806740000	85	17.9944	NaN	17.4568	20.755	22.6405	22.5172	P18133	Nicotinate phosphoribosyltransferase
1	2.16075	4.17415	ydbK	128.82	218.57	293180000	59	16.2629	15.4435	15.9438	20.6644	18.5089	20.9993	P52647	Probable pyruvate-flavodoxin oxidoreductase
1	1.91323	3.87478	purH	57.329	201.09	465640000	53	16.6365	18.518	NaN	21.405	21.6411	21.3099	P15639	Bifunctional purine biosynthesis protein PurH;Phosphoribosylaminoimidazolecarboxamide formyltransferase;IMP cyclohydrolase
1	3.06725	3.837	avtA	46.711	125.23	327360000	24	NaN	18.064	17.964	21.6519	21.6179	22.2832	P09053	Valine--pyruvate aminotransferase
1	2.07152	3.83203	proB	39.056	237.39	1487600000	96	19.4913	17.2684	19.7298	22.9152	22.5374	22.5328	P0A7B5	Glutamate 5-kinase
1	3.85016	3.59592	fbp	36.833	181.64	956670000	63	19.7336	19.0199	18.9643	22.932	22.7725	22.801	P0A993	Fructose-1,6-bisphosphatase class 1
1	3.29952	3.5618	yfcH	32.698	250.28	1390900000	58	20.4703	19.4622	20.293	23.9112	23.3864	23.6132	P77775	Epimerase family protein YfcH
1	2.19514	3.50775	ddlB	32.839	204.6	703730000	42	20.5661	19.2109	NaN	23.5123	23.3962	23.2801	P07862	D-alanine--D-alanine ligase B
1	3.01939	3.50322	parE	70.243	167.83	404850000	53	17.8459	18.3158	17.2167	20.8047	21.541	21.5423	P20083	DNA topoisomerase 4 subunit B
1	2.56362	3.47932	fruK	33.755	323.31	1471600000	72	20.7428	19.1461	20.6198	23.6187	23.4548	23.8731	P0AEW9	1-phosphofructokinase
1	2.16766	3.46288	ybaB	12.015	164.96	1989700000	70	21.6398	22.0051	19.8499	24.7859	24.6643	24.4333	P0A8B5	Nucleoid-associated protein YbaB
1	1.35344	3.42874	acuI	34.723	250.45	1447800000	90	NaN	22.3289	19.9505	25.3554	24.0494	24.3005	P26646	Probable acrylyl-CoA reductase AcuI
1	4.21157	3.39125	zntA	76.839	131.39	192860000	38	16.8323	17.2673	17.0543	20.6309	20.5426	20.1542	P37617	Lead, cadmium, zinc and mercury-transporting ATPase
1	3.21605	3.38677	dsbA	23.104	207.18	1398200000	62	20.6343	19.5471	20.3276	23.7764	23.5354	23.3576	P0AEG4	Thiol:disulfide interchange protein DsbA
1	3.03773	3.16111	wbbJ	21.675	221.7	758800000	36	19.9269	20.1452	20.0551	23.3737	22.5246	23.7123	P37750	Putative lipopolysaccharide biosynthesis O-acetyl transferase WbbJ
1	3.99111	3.14324	pta	77.171	323.31	10125000000	385	21.7601	21.8935	21.5506	25.102	24.5284	25.0035	P0A9M8	Phosphate acetyltransferase
1	2.95254	3.1335	osmC	15.088	141.25	608800000	27	19.33	NaN	19.7614	22.7505	22.3914	22.8958	P0C0L2	Peroxiredoxin OsmC
1	1.76959	3.07735	metH	136	323.31	2275000000	194	19.8195	18.2547	20.4482	22.6784	21.7963	23.2798	P13009	Methionine synthase
1	4.56204	3.01442	fabI	27.864	323.31	13974000000	442	23.4735	23.9009	23.5971	26.7356	26.7246	26.5546	P0AEK4	Enoyl-[acyl-carrier-protein] reductase [NADH] FabI
1	3.19487	2.98401	murC	53.625	230.03	366210000	45	18.7526	18.0827	18.0077	21.3671	21.5445	20.8833	P17952	UDP-N-acetylmuramate--L-alanine ligase
1	4.69718	2.97511	aceB	60.273	323.31	1599600000	116	19.9105	20.1636	20.3446	23.0975	23.0901	23.1564	P08997	Malate synthase A
1	2.53749	2.91289	cysG	49.951	135.37	148380000	29	17.5767	16.7913	NaN	19.9927	20.3115	19.9865	P0AEA8	Siroheme synthase;Uroporphyrinogen-III C-methyltransferase;Precorrin-2 dehydrogenase;Sirohydrochlorin ferrochelatase
1	2.77791	2.87872	ygdH	50.971	166.11	501980000	56	19.5054	18.2581	18.7285	21.6861	21.9248	21.5172	P0ADR8	LOG family protein YgdH
1	3.57405	2.84721	aroH	38.735	68.344	148400000	24	17.6016	17.6533	17.5727	20.6088	20.7632	19.9971	P00887	Phospho-2-dehydro-3-deoxyheptonate aldolase, Trp-sensitive
1	3.3739	2.82303	aroB	38.881	202.36	194000000	27	NaN	17.8737	17.4449	20.4382	20.4789	20.5299	P07639	3-dehydroquinate synthase
1	4.67172	2.81034	yceD	19.315	82.724	970540000	42	20.936	20.7899	20.6529	23.7754	23.5688	23.4656	P0AB28	Uncharacterized protein YceD
1	4.58063	2.7866	deoD	25.95	323.31	9349000000	363	23.0289	23.1138	23.0666	25.8722	25.6315	26.0654	P0ABP8	Purine nucleoside phosphorylase DeoD-type
1	2.22558	2.74773	mprA	20.563	234.81	875170000	51	20.8472	20.6407	19.2862	23.2753	22.7208	23.0213	P0ACR9	Transcriptional repressor MprA
1	2.23008	2.73492	tyrR	57.655	107.7	189350000	27	17.9584	NaN	17.1819	20.092	20.7062	20.1171	P07604	Transcriptional regulatory protein TyrR
1	5.16644	2.59651	wrbA	20.845	177.47	1217900000	59	20.8592	20.7658	20.7931	23.4018	23.2638	23.5419	P0A8G6	NAD(P)H dehydrogenase (quinone)
1	2.41979	2.58437	pdxK	30.847	97.849	255480000	20	19.3549	19.5697	19.6326	21.2763	22.3902	22.6439	P40191	Pyridoxine kinase
1	2.62039	2.51726	nagB	29.774	79.58	714000000	50	19.645	20.4921	20.1185	22.911	22.8422	22.0541	P0A759	Glucosamine-6-phosphate deaminase
1	2.5303	2.50401	minD	29.614	180.41	699660000	45	20.8265	19.5439	20.2228	22.5188	22.9084	22.678	P0AEZ3	Septum site-determining protein MinD
1	1.64905	2.5003	mglA	56.415	130.86	178260000	35	17.5021	17.4698	17.8862	19.887	21.3936	19.0784	P0AAG8	Galactose/methyl galactoside import ATP-binding protein MglA
1	2.29631	2.47954	prpC	43.102	126.12	187800000	33	17.7317	17.5504	17.8244	19.3078	20.6187	20.6185	P31660	2-methylcitrate synthase
1	2.05543	2.30911	ubiD	55.603	184.93	361930000	32	19.3789	18.6338	20.0763	21.2289	21.7103	22.077	P0AAB4	3-octaprenyl-4-hydroxybenzoate carboxy-lyase
1	2.24881	2.29291	carB	117.84	276.42	453120000	63	18.6521	19.2925	17.8312	20.8522	20.8748	20.9276	P00968	Carbamoyl-phosphate synthase large chain
1	5.31313	2.26459	pflB	85.356	323.31	28857000000	988	24.0259	23.98	23.8092	26.1706	26.2275	26.2107	P09373	Formate acetyltransferase 1
1	3.23157	2.24087	mfd	129.98	70.208	78881000	28	16.8308	16.5114	NaN	18.9345	19.0096	18.7918	P30958	Transcription-repair-coupling factor
1	2.04594	2.22717	dnaA	52.55	76.026	103800000	24	18.0936	17.0478	17.1821	20.163	19.0294	19.8127	P03004	Chromosomal replication initiator protein DnaA
1	2.34004	2.1685	gldA	38.712	165.44	483150000	49	20.2988	20.0379	19.0742	22.0981	21.9307	21.8876	P0A9S5	Glycerol dehydrogenase
1	2.77126	2.16029	rlmN	43.085	122.34	487540000	38	19.389	19.8901	19.0954	21.7687	21.8092	21.2775	P36979	Dual-specificity RNA methyltransferase RlmN
1	3.25681	2.15915	parC	83.83	195.85	331830000	47	19.0692	18.634	18.7185	20.888	20.7211	21.29	P0AFI2	DNA topoisomerase 4 subunit A
1	2.50105	2.14406	pyrH	25.97	172.08	187900000	19	19.0128	NaN	18.7397	21.0032	20.7297	21.328	P0A7E9	Uridylate kinase
1	3.7857	2.1424	corC	33.298	29.446	82601000	16	17.6385	NaN	17.5913	19.8021	19.8472	19.6227	P0AE78	Magnesium and cobalt efflux protein CorC
1	3.1391	2.13183	prmA	31.877	28.74	199480000	23	19.3291	19.5383	19.0931	21.8014	21.1568	21.3978	P0A8T1	Ribosomal protein L11 methyltransferase
1	4.41304	2.10417	icd	45.756	323.31	5718200000	192	23.0575	23.1476	23.0796	25.0041	25.3538	25.2394	P08200	Isocitrate dehydrogenase [NADP]
1	3.96657	2.10044	proV	44.162	161.65	509470000	42	19.5362	19.666	19.7177	21.5451	21.6981	21.9781	P14175	Glycine betaine/L-proline transport ATP-binding protein ProV
1	2.49672	2.08082	gpsA	36.361	99.932	290400000	28	18.3936	19.2686	19.081	20.6659	20.9852	21.3346	P0A6S7	Glycerol-3-phosphate dehydrogenase [NAD(P)+]
1	3.51791	2.05969	recA	37.973	323.31	1159700000	91	22.0747	21.8249	21.726	24.0618	23.6516	24.0914	P0A7G6	Protein RecA
1	2.62667	2.02164	clpP	23.186	115.45	353730000	39	20.2605	19.3809	20.045	21.9783	21.6688	22.1042	P0A6G7	ATP-dependent Clp protease proteolytic subunit
1	2.65389	1.99401	nagD	27.163	86.514	155680000	26	18.9669	18.3818	17.9899	20.473	20.4737	20.374	P0AF24	Ribonucleotide monophosphatase NagD
1	4.14453	1.96697	gcvT	40.146	207.34	2183900000	105	21.7478	21.9397	21.7906	23.6978	23.9944	23.6868	P27248	Aminomethyltransferase
1	3.98647	1.96012	mreB	36.952	248.3	2145800000	138	21.3776	21.7287	21.4281	23.3586	23.5815	23.4747	P0A9X4	Rod shape-determining protein MreB
1	4.49591	1.92671	galU	32.942	309.52	2078500000	76	21.8893	22.163	21.958	23.8442	23.964	23.9822	P0AEP3	UTP--glucose-1-phosphate uridylyltransferase
1	3.14948	1.86527	queA	39.43	97.462	234270000	25	19.0831	18.5209	18.6256	20.7542	20.4243	20.6468	P0A7F9	S-adenosylmethionine:tRNA ribosyltransferase-isomerase
1	3.51508	1.86396	pyrG	60.373	323.31	3219300000	200	21.6472	22.0031	21.5214	23.5243	23.7233	23.5161	P0A7E5	CTP synthase
1	4.61423	1.82581	glnS	63.477	323.31	2580400000	129	21.8395	21.7736	21.6435	23.5623	23.4852	23.6866	P00962	Glutamine--tRNA ligase
1	2.32579	1.82049	pntA	54.623	136.64	272070000	40	18.972	18.4496	19.1536	20.2037	20.8488	20.9841	P07001	NAD(P) transhydrogenase subunit alpha
1	4.71442	1.78248	hemB	35.624	90.993	194640000	19	18.9	18.9848	19.1163	20.7172	20.8614	20.77	P0ACB2	Delta-aminolevulinic acid dehydratase
1	2.33972	1.77009	ppc	99.061	243.7	684210000	100	20.5306	19.6672	20.5431	21.9429	21.8828	22.2255	P00864	Phosphoenolpyruvate carboxylase
1	2.96456	1.76017	gyrB	89.949	323.31	2304600000	174	21.3439	20.8709	20.6375	22.7249	22.7379	22.6701	P0AES6	DNA gyrase subunit B
1	2.0341	1.75598	tsaC	20.767	70.237	179420000	28	20	19.1843	18.9961	21.4814	21.2065	20.7605	P45748	Threonylcarbamoyl-AMP synthase
1	3.62693	1.74949	tdcB	35.232	197.59	772410000	82	20.1751	20.2216	20.0122	21.954	22.0597	21.6438	P0AGF6	L-threonine dehydratase catabolic TdcB
1	2.63587	1.73224	rapA	109.77	323.31	1271300000	126	20.6426	20.4103	19.8105	21.9781	21.9831	22.0989	P60240	RNA polymerase-associated protein RapA
1	2.33675	1.72373	rbsA	55.041	323.31	656530000	83	20.9022	20.1422	20.9694	22.3638	22.6557	22.1655	P04983	Ribose import ATP-binding protein RbsA
1	2.3596	1.72314	lldD	42.728	181.18	743690000	69	20.0961	20.36	19.5478	21.7369	22.0218	21.4146	P33232	L-lactate dehydrogenase
1	4.17424	1.70643	hemL	45.366	244.61	1197400000	63	21.0002	21.1819	20.997	22.6331	22.7617	22.9036	P23893	Glutamate-1-semialdehyde 2,1-aminomutase
1	2.50626	1.70132	glpB	45.357	166.4	275370000	31	20.3418	19.4327	20.0355	21.6249	21.6407	21.6484	P13033	Anaerobic glycerol-3-phosphate dehydrogenase subunit B
1	4.17472	1.69864	stpA	15.347	99.396	383130000	30	20.3413	20.3926	20.5815	22.2691	22.0828	22.0593	P0ACG1	DNA-binding protein StpA
1	3.48909	1.68822	fabB	42.613	323.31	2878700000	109	22.7433	22.463	22.424	24.3352	24.0184	24.3412	P0A953	3-oxoacyl-[acyl-carrier-protein] synthase 1
1	2.30804	1.65736	skp	17.688	95.851	517450000	49	20.7525	21.3145	21.7025	23.0465	22.7086	22.9865	P0AEU7	Chaperone protein Skp
1	3.33347	1.62459	selD	36.687	210.43	786170000	65	20.4412	20.4853	20.1321	22.1895	21.9026	21.8403	P16456	Selenide, water dikinase
1	2.23165	1.57821	gatZ	47.108	323.31	1571500000	73	22.4365	21.485	21.6439	23.4651	23.4148	23.4201	P0C8J8	D-tagatose-1,6-bisphosphate aldolase subunit GatZ
1	1.66175	1.57734	nrdD	80.022	163.12	133810000	28	17.7651	18.0669	NaN	19.849	18.978	19.653	P28903	Anaerobic ribonucleoside-triphosphate reductase
1	1.60444	1.57307	acs	72.093	69.085	93303000	29	NaN	17.5182	18.0812	19.1577	19.855	19.1057	P27550	Acetyl-coenzyme A synthetase
1	4.67479	1.56729	ftsH	70.707	323.31	2152500000	167	21.2875	21.0582	21.1263	22.7165	22.7261	22.7313	P0AAI3	ATP-dependent zinc metalloprotease FtsH
1	4.35037	1.56094	glpT	50.31	184.03	2456900000	146	23.1467	23.3351	23.2417	24.7515	24.924	24.7308	P08194	Glycerol-3-phosphate transporter
1	2.88538	1.54553	tnaA	52.773	323.31	44357000000	815	25.9303	26.0837	25.5653	27.2585	27.6333	27.324	P0A853	Tryptophanase
1	1.92225	1.54524	speA	73.898	257.6	905360000	73	21.4955	20.6102	21.3556	22.4288	22.528	23.1402	P21170	Biosynthetic arginine decarboxylase
1	3.38334	1.53358	sdaB	48.752	323.31	1558900000	116	21.5109	21.999	21.7466	23.2772	23.3148	23.2653	P30744	L-serine dehydratase 2
1	3.45259	1.51466	fabH	33.515	121.15	684540000	54	21.169	20.7816	20.9644	22.4585	22.3737	22.6267	P0A6R0	3-oxoacyl-[acyl-carrier-protein] synthase 3
1	2.62766	1.51088	coaBC	43.438	275.91	394470000	39	20.7152	20.1939	20.596	22.2966	21.7698	21.9714	P0ABQ0	Coenzyme A biosynthesis bifunctional protein CoaBC;Phosphopantothenoylcysteine decarboxylase;Phosphopantothenate--cysteine ligase
1	4.3901	1.48814	lpdA	50.688	323.31	16686000000	599	24.1803	24.293	24.1032	25.6472	25.6101	25.7836	P0A9P0	Dihydrolipoyl dehydrogenase
1	4.44558	1.48522	tig	48.192	323.31	12496000000	415	24.6079	24.708	24.7593	26.1341	26.1035	26.2932	P0A850	Trigger factor
1	3.16503	1.48211	tufB;tufA	43.313	323.31	107530000000	1387	27.8598	27.4327	27.5905	29.2963	29.0021	29.0309	P0CE48	Elongation factor Tu 2;Elongation factor Tu 1
1	4.93173	1.48184	serS	48.413	323.31	2260100000	156	21.7981	21.9618	21.8887	23.3425	23.3295	23.4221	P0A8L1	Serine--tRNA ligase
1	4.91734	1.48073	lon	87.437	323.31	1586000000	167	20.594	20.5138	20.6261	22.043	21.9901	22.1431	P0A9M0	Lon protease
1	4.13003	1.47272	ftsZ	40.323	323.31	14083000000	167	27.7321	27.9196	27.9108	29.2988	29.4475	29.2344	P0A9A6	Cell division protein FtsZ
1	4.36147	1.4638	accD	33.322	144.67	742240000	77	20.6327	20.773	20.6343	22.0337	22.2423	22.1554	P0A9Q5	Acetyl-coenzyme A carboxylase carboxyl transferase subunit beta
1	2.85077	1.45937	sthA	51.56	299.05	762990000	84	20.3511	20.0817	19.7729	21.512	21.6748	21.397	P27306	Soluble pyridine nucleotide transhydrogenase
1	2.71304	1.4361	fabG	25.56	323.31	3077900000	86	23.0798	22.5212	22.7344	24.2331	24.0092	24.4015	P0AEK2	3-oxoacyl-[acyl-carrier-protein] reductase FabG
1	1.38512	1.39822	ycaO	65.651	184.83	259020000	40	19.2745	20.3431	20.323	20.7546	21.6942	21.6865	P75838	Ribosomal protein S12 methylthiotransferase accessory factor YcaO
1	4.14996	1.38082	der	55.035	311.26	455070000	49	20.0674	19.8963	20.001	21.2907	21.4967	21.3197	P0A6P5	GTPase Der
1	2.20269	1.37899	ucpA	27.85	93.135	201540000	27	19.2642	19.4503	19.4848	20.3993	21.259	20.6781	P37440	Oxidoreductase UcpA
1	4.54218	1.36734	nusA	54.87	323.31	2145500000	152	21.4061	21.5157	21.4893	22.804	22.7638	22.9453	P0AFF6	Transcription termination/antitermination protein NusA
1	2.40968	1.36603	acnA	97.676	77.371	66288000	22	18.4324	NaN	18.1655	19.5106	19.619	19.8652	P25516	Aconitate hydratase A
1	1.33518	1.3462	lptB	26.8	38.127	146150000	19	19.8864	NaN	19.6751	21.3132	20.5191	21.5486	P0A9V1	Lipopolysaccharide export system ATP-binding protein LptB
1	4.7497	1.33395	lepA	66.57	323.31	1896300000	111	21.406	21.4784	21.3811	22.8237	22.6649	22.7787	P60785	Elongation factor 4
1	4.36299	1.32566	metG	76.254	323.31	1466900000	133	20.8973	20.8856	20.8648	22.0715	22.2776	22.2756	P00959	Methionine--tRNA ligase
1	3.80794	1.32432	mrp	39.938	74.075	268750000	31	20.0634	20.2134	19.9438	21.5073	21.3375	21.3487	P0AF08	Protein mrp
1	2.1782	1.31996	uxuB	53.58	123.83	238670000	33	20.1016	19.9977	20.615	21.2661	21.8527	21.5554	P39160	D-mannonate oxidoreductase
1	2.03596	1.31985	malT	103.12	54.231	93179000	25	17.7965	NaN	18.3243	19.4539	19.2297	19.4571	P06993	HTH-type transcriptional regulator MalT
1	2.48102	1.30815	frmA	39.359	265.79	874380000	54	21.5662	21.3365	21.0474	22.6639	22.3565	22.8541	P25437	S-(hydroxymethyl)glutathione dehydrogenase
1	1.85311	1.29214	hsdM	59.306	129.45	348250000	40	21.158	20.9033	20.1328	21.9892	21.9942	22.0872	P08957	Type I restriction enzyme EcoKI M protein
1	2.83078	1.28686	rpoD	70.263	318.12	1161000000	110	21.3502	21.3162	20.8769	22.5396	22.3391	22.5253	P00579	RNA polymerase sigma factor RpoD
1	2.32085	1.28372	udp	27.159	323.31	2920600000	149	23.1879	23.8978	23.3336	24.8363	24.8096	24.6247	P12758	Uridine phosphorylase
1	2.71134	1.27314	sdaA	48.906	98.971	217960000	27	19.9454	19.5228	19.9157	20.8873	21.2722	21.0438	P16095	L-serine dehydratase 1
1	3.02372	1.25687	glyQ	34.774	157.52	671010000	56	21.3068	20.887	21.0489	22.3424	22.4669	22.204	P00960	Glycine--tRNA ligase alpha subunit
1	2.87598	1.23261	glyS	76.812	323.31	2472300000	231	21.139	21.2722	21.0843	22.201	22.6779	22.3144	P00961	Glycine--tRNA ligase beta subunit
1	2.38353	1.21246	panM	14.505	62.193	208960000	23	20.6119	20.232	20.7635	21.9957	21.5477	21.7013	P37613	PanD maturation factor
1	2.8851	1.20521	crp	23.64	87.227	872160000	72	21.6696	21.9545	21.477	23.0074	22.8998	22.8095	P0ACJ8	cAMP-activated global transcriptional regulator CRP
1	4.10062	1.19801	hldE	51.05	206.53	621440000	75	20.2853	20.36	20.458	21.491	21.6676	21.5389	P76658	Bifunctional protein HldE;D-beta-D-heptose 7-phosphate kinase;D-beta-D-heptose 1-phosphate adenylyltransferase
1	3.56469	1.18395	kbl	43.117	105.09	457860000	49	20.2951	20.3294	20.3629	21.5641	21.3267	21.6485	P0AB77	2-amino-3-ketobutyrate coenzyme A ligase
1	3.73954	1.16838	secA	102.02	323.31	1068200000	125	21.3525	21.5893	21.4729	22.5399	22.728	22.652	P10408	Protein translocase subunit SecA
1	3.34761	1.15564	hslU	49.593	262.64	1703900000	143	21.6615	21.9993	21.7887	22.9454	22.9077	23.0634	P0A6H5	ATP-dependent protease ATPase subunit HslU
1	2.47913	1.15396	glk	34.723	70.229	179900000	22	19.5761	19.9125	19.6247	20.5647	20.9411	21.0694	P0A6V8	Glucokinase
1	3.03622	1.15107	yfgM	22.176	87.491	107370000	25	19.0215	19.2323	18.9181	20.0425	20.2202	20.3624	P76576	UPF0070 protein YfgM
1	2.53282	1.14551	polA	103.12	230.41	355140000	66	19.4732	19.5837	20.0454	20.8803	20.7994	20.8591	P00582	DNA polymerase I
1	2.96085	1.13441	moeA	44.067	153.25	210250000	21	19.7628	19.7921	19.6549	20.9608	20.618	21.0343	P12281	Molybdopterin molybdenumtransferase
1	2.51144	1.10262	tpx	17.835	323.31	3567300000	121	23.3416	23.8026	23.4299	24.5918	24.8141	24.4762	P0A862	Thiol peroxidase
1	3.40978	1.0836	guaA	58.679	323.31	2734800000	176	22.023	21.7306	21.8329	22.9407	22.8639	23.0327	P04079	GMP synthase [glutamine-hydrolyzing]
1	4.30764	1.07187	ydgA	54.688	236.55	443010000	64	19.6169	19.7241	19.6615	20.8047	20.6445	20.7689	P77804	Protein YdgA
1	4.07816	1.06071	fabF	43.045	279.9	1056300000	94	22.0134	21.979	22.0115	22.9403	23.1585	23.0872	P0AAI5	3-oxoacyl-[acyl-carrier-protein] synthase 2
1	2.75969	1.05467	ychF	39.667	244.36	926500000	82	21.2565	20.8551	21.1995	22.2441	22.2024	22.0286	P0ABU2	Ribosome-binding ATPase YchF
1	2.1527	1.03209	trxB	34.623	85.962	198200000	31	19.3296	19.6345	19.8178	20.3728	20.8731	20.6323	P0A9P4	Thioredoxin reductase
1	2.12083	1.02841	thrC	47.113	187.38	264120000	44	20.1306	19.4988	19.7979	21.029	20.7244	20.7591	P00934	Threonine synthase
1	2.48912	1.02363	bglA	55.36	147.61	340700000	55	19.6478	19.437	19.4745	20.8217	20.3123	20.4963	Q46829	6-phospho-beta-glucosidase BglA
1	3.33106	1.01051	fabA	18.969	39.721	1954600000	96	23.0398	23.2634	23.0649	24.0669	24.0688	24.264	P0A6Q3	3-hydroxydecanoyl-[acyl-carrier-protein] dehydratase
1	2.16499	1.00612	yhgF	85.119	147.07	312840000	63	19.9309	19.2588	19.6539	20.5839	20.6217	20.6565	P46837	Protein YhgF
0	2.42616	0.950564	glnA	51.903	323.31	2481300000	133	23.1542	23.017	22.8261	23.7572	23.9084	24.1834	P0A9C5	Glutamine synthetase
0	1.02477	0.857826	ftsY	54.513	72.635	185450000	26	21.4598	20.2884	20.4437	21.7112	21.3096	21.7446	P10121	Signal recognition particle receptor FtsY
0	2.55447	0.79124	infB	97.349	323.31	3474400000	203	23.2523	22.8768	22.9445	23.8123	23.8771	23.7579	P0A705	Translation initiation factor IF-2
0	3.23743	0.73099	pheT	87.377	323.31	1831800000	158	21.5197	21.626	21.4754	22.2097	22.2159	22.3884	P07395	Phenylalanine--tRNA ligase beta subunit
0	1.18555	0.598323	folA	17.999	18.895	49905000	11	19.6139	19.6848	NaN	19.9261	20.3831	20.4338	P0ABQ4	Dihydrofolate reductase
0	1.72842	0.46575	glpK	56.23	323.31	6676600000	327	23.7765	23.9079	23.5213	24.1758	24.2867	24.1404	P0A6F3	Glycerol kinase
0	1.48816	0.413128	hisB	40.278	18.648	29823000	10	17.9994	18.0917	17.6725	18.3657	18.3373	18.3	P06987	Histidine biosynthesis bifunctional protein HisB;Histidinol-phosphatase;Imidazoleglycerol-phosphate dehydratase
0	0.7906	0.28645	gatY	30.812	92.131	1479300000	118	23.0107	23.1257	22.6572	23.3952	23.1547	23.1031	P0C8J6	D-tagatose-1,6-bisphosphate aldolase subunit GatY
0	0.51092	0.247913	rlmL	78.853	98.918	197860000	53	19.3829	19.8176	19.8395	20.0044	19.6349	20.1444	P75864	Ribosomal RNA large subunit methyltransferase K/L;23S rRNA m2G2445 methyltransferase;23S rRNA m7G2069 methyltransferase
0	1.74214	0.206376	rnb	72.49	140.59	439900000	71	20.577	20.406	20.4961	20.6589	20.7242	20.7152	P30850	Exoribonuclease 2
0	0.688715	0.170705	glpC	44.108	85.999	329240000	48	20.5638	20.4162	20.7765	20.7173	20.8407	20.7106	P0A996	Anaerobic glycerol-3-phosphate dehydrogenase subunit C
0	1.3888	0.163043	pnp	77.1	323.31	1550600000	147	22.1362	22.0586	21.9562	22.2028	22.2464	22.1911	P05055	Polyribonucleotide nucleotidyltransferase
0	0.853445	0.140432	gyrA	96.962	323.31	1078200000	134	22.3965	22.2418	22.1773	22.3496	22.4002	22.4871	P0AES4	DNA gyrase subunit A
0	0.0888533	0.0939875	uspF	16.016	18.478	50201000	14	19.4892	19.1572	NaN	19.5182	19.8235	18.9099	P37903	Universal stress protein F
0	0.212123	0.0764408	treC	63.837	77.814	378860000	56	21.2478	20.9618	20.9758	21.0122	21.3452	21.0572	P28904	Trehalose-6-phosphate hydrolase
0	0.135433	0.037412	htpG	71.422	323.31	1606100000	157	22.2039	22.1091	22.1948	22.0669	22.3939	22.1593	P0A6Z3	Chaperone protein HtpG
0	0.125466	-0.0221882	manX	35.047	88.367	171310000	26	20.8794	20.8719	20.9459	20.8471	20.9931	20.7906	P69797	PTS system mannose-specific EIIAB component;Mannose-specific phosphotransferase enzyme IIA component;Mannose-specific phosphotransferase enzyme IIB component
0	0.131629	-0.025589	lysU	57.826	198.58	659200000	92	21.8716	22.0559	21.9562	21.8762	21.9008	22.03	P0A8N5	Lysine--tRNA ligase, heat inducible
0	0.0520892	-0.0294151	sucD	29.777	98.533	475820000	57	21.8894	21.8173	21.3926	21.8166	21.7556	21.4388	P0AGE9	Succinyl-CoA ligase [ADP-forming] subunit alpha
0	0.259398	-0.049221	zwf	55.704	174.05	368060000	73	20.6966	20.5322	20.4864	20.6034	20.4801	20.484	P0AC53	Glucose-6-phosphate 1-dehydrogenase;Extracellular death factor
0	0.711966	-0.0501258	pykF	50.729	323.31	1960100000	193	22.7823	22.8116	22.8352	22.796	22.7789	22.7039	P0AD61	Pyruvate kinase I
0	0.184789	-0.0862471	lysS	57.603	323.31	11594000000	140	27.8808	27.6815	27.832	27.4496	27.6621	28.0239	P0A8N3	Lysine--tRNA ligase
0	0.165551	-0.0992902	mtlA	67.971	40.172	46611000	21	NaN	18.5909	18.5993	18.2294	18.8142	18.4439	P00550	PTS system mannitol-specific EIICBA component;Mannitol permease IIC component;Mannitol-specific phosphotransferase enzyme IIB component;Mannitol-specific phosphotransferase enzyme IIA component
0	1.2207	-0.110007	fusA	77.58	323.31	13880000000	537	25.021	25.1063	25.0563	24.908	24.9266	25.019	P0A6M8	Elongation factor G
0	0.682843	-0.145929	rpsA	61.157	323.31	9927600000	425	24.7818	24.7584	24.6021	24.7225	24.5212	24.4608	P0AG67	30S ribosomal protein S1
0	0.616072	-0.241679	hinT	13.241	22.104	102130000	20	20.6051	20.9195	21.0339	20.5937	20.4111	20.8287	P0ACE7	HIT-like protein HinT
0	1.3293	-0.247986	pgm	58.36	103.47	267590000	46	21.0617	20.9173	20.9523	20.7382	20.5937	20.8554	P36938	Phosphoglucomutase
0	1.97761	-0.383169	tpiA	26.972	119.43	437340000	51	21.8998	21.8312	21.8125	21.4462	21.6119	21.3359	P0A858	Triosephosphate isomerase
0	1.09703	-0.445725	glpD	56.75	323.31	1244500000	175	22.1468	22.5213	21.8959	21.8025	21.7999	21.6244	P13035	Aerobic glycerol-3-phosphate dehydrogenase
0	1.07878	-0.490307	grcA	14.284	167.36	1097400000	72	23.4951	23.5445	23.0186	23.0553	22.923	22.6089	P68066	Autonomous glycyl radical cofactor
0	0.621933	-0.54312	ydeN	62.801	19.537	20080000	6	19.0123	NaN	18.5893	18.008	18.5074	NaN	P77318	Uncharacterized sulfatase YdeN
0	2.46527	-0.604995	rplI	15.769	74.933	2414700000	108	24.2567	24.5234	24.4662	23.918	23.7664	23.7469	P0A7R1	50S ribosomal protein L9
0	1.71847	-0.611383	dnaK	69.114	323.31	4711400000	325	24.2345	24.637	24.2456	23.5955	23.9116	23.7759	P0A6Y8	Chaperone protein DnaK
0	0.881898	-0.613221	infA	8.2495	40.061	129860000	14	22.2265	22.2939	NaN	21.2111	21.7401	21.9897	P69222	Translation initiation factor IF-1
0	1.48978	-0.652466	dhaM	51.448	221.41	324480000	55	20.8798	21.2794	20.7386	20.1833	20.5575	20.1996	P37349	PTS-dependent dihydroxyacetone kinase, phosphotransferase subunit DhaM;Phosphocarrier protein HPr;Phosphotransferase enzyme IIA component
0	1.69371	-0.79275	rpsF	15.703	168.65	1493700000	58	24.3887	23.7958	24.4559	23.3557	23.4411	23.4654	P02358	30S ribosomal protein S6;30S ribosomal protein S6, fully modified isoform;30S ribosomal protein S6, non-modified isoform
0	1.79434	-0.898478	gapA	35.532	323.31	4483000000	240	25.5645	25.4002	25.0197	24.681	24.4636	24.1444	P0A9B2	Glyceraldehyde-3-phosphate dehydrogenase A
0	2.30496	-0.902409	ybiB	35.048	89.053	276670000	43	22.1562	22.4244	22.1307	21.5919	21.1677	21.2445	P30177	Uncharacterized protein YbiB
0	2.83954	-0.949415	eno	45.654	323.31	3188200000	176	24.3385	24.6427	24.2895	23.5255	23.5238	23.3731	P0A6P9	Enolase
0	0.965273	-0.954943	raiA	12.784	153.05	262580000	33	23.2711	21.8214	23.1173	21.8568	21.6686	21.8197	P0AD49	Ribosome-associated inhibitor A
0	0.83592	-1.14076	ihfB	10.651	10.163	18999000	10	19.7778	NaN	18.8956	18.9292	17.7006	17.9579	P0A6Y1	Integration host factor subunit beta
0	0.774329	-1.90163	folE	24.83	240.37	1734000000	147	25.5337	22.8228	25.3385	23.5624	21.2398	23.1879	P0A6T5	GTP cyclohydrolase 1
0	0.885734	2.34368	oppF	37.197	81.925	212600000	37	NaN	17.9145	20.6349	20.8491	21.8992	22.1069	P77737	Oligopeptide transport ATP-binding protein OppF
0	1.22167	1.64097	hsdR	134.09	41.231	45202000	17	NaN	17.2249	17.0017	18.0752	19.5396	18.648	P08956	Type I restriction enzyme EcoKI R protein
0	1.09312	1.41917	garR	30.427	136.39	323280000	28	NaN	21.1932	20.0851	22.2305	22.4295	21.5151	P0ABQ2	2-hydroxy-3-oxopropionate reductase
0	1.2724	1.36171	trpS	37.437	323.31	1277200000	64	21.9093	20.979	21.2215	23.4296	22.7801	21.9852	P00954	Tryptophan--tRNA ligase
0	1.28985	1.25214	panC	31.597	113.62	175760000	22	20.1005	18.8468	19.7658	20.9848	20.3176	21.1671	P31663	Pantothenate synthetase
0	1.08705	1.13817	cadA	81.259	128.54	282640000	57	20.5641	19.2964	20.7227	21.3331	20.9919	21.6727	P0A9H3	Lysine decarboxylase, inducible
0	0.945472	1.00744	ybiT	59.857	110.55	97915000	27	17.8392	NaN	18.3379	18.6623	19.7233	18.9024	P0A9U3	Uncharacterized ABC transporter ATP-binding protein YbiT
0	2.13256	0.983596	nanK	29.644	56.65	174640000	23	20.374	20.858	20.471	21.2978	21.6426	21.7135	P45425	N-acetylmannosamine kinase
0	1.77549	0.962936	clpX	46.355	323.31	992920000	109	21.102	21.3628	21.113	21.958	22.6106	21.898	P0A6H1	ATP-dependent Clp protease ATP-binding subunit ClpX
0	2.2589	0.957197	miaB	53.662	323.31	1396800000	121	22.2677	21.7551	22.0983	22.9352	22.8823	23.1752	P0AEI1	tRNA-2-methylthio-N(6)-dimethylallyladenosine synthase
0	1.60495	0.956847	nagC	44.541	114.31	90415000	21	18.0861	18.5013	18.6074	19.2236	19.7883	19.0535	P0AF20	N-acetylglucosamine repressor
0	2.96428	0.954851	ycbL	23.784	29.682	148750000	21	20.4264	NaN	20.2723	21.2282	21.3318	21.3527	P75849	Uncharacterized protein YcbL
0	1.32528	0.935669	uup	72.066	100.64	96401000	24	19.1017	NaN	19.8548	20.3848	20.5077	20.3494	P43672	ABC transporter ATP-binding protein uup
0	0.920633	0.927983	obgE	43.285	74.908	9434000000	82	28.2526	26.9517	28.4114	28.6644	28.7679	28.9674	P42641	GTPase ObgE/CgtA
0	1.44546	0.919424	putA	143.81	172.58	264550000	61	18.732	19.6821	18.9045	19.9676	20.1134	19.9959	P09546	Bifunctional protein PutA;Proline dehydrogenase;Delta-1-pyrroline-5-carboxylate dehydrogenase
0	1.99158	0.877431	wbbI	37.757	78.924	373420000	48	20.5456	20.1201	20.1805	20.9319	21.4087	21.1378	P37749	Beta-1,6-galactofuranosyltransferase WbbI
0	2.48866	0.873634	mpl	49.874	57.456	134590000	24	19.5546	19.2551	19.1307	20.2732	20.2124	20.0757	P37773	UDP-N-acetylmuramate--L-alanyl-gamma-D-glutamyl-meso-2,6-diaminoheptandioate ligase
0	0.575698	0.86983	mutS	95.246	110.43	138490000	31	18.5366	19.7579	NaN	19.6937	20.7077	19.6498	P23909	DNA mismatch repair protein MutS
0	1.56881	0.86512	rnc	25.55	54.322	187090000	24	20.1461	19.8305	20.122	20.7874	21.3443	20.5623	P0A7Y0	Ribonuclease 3
0	1.5472	0.86012	potA	43.028	71.056	138660000	28	19.5	19.5931	18.859	20.0062	20.1402	20.3861	P69874	Spermidine/putrescine import ATP-binding protein PotA
0	1.49766	0.859542	purB	51.542	167.96	423140000	58	20.6823	20.8507	20.0017	21.3945	21.4552	21.2637	P0AB89	Adenylosuccinate lyase
0	2.64706	0.855625	ackA	43.29	323.31	6430000000	278	23.7673	23.9175	23.9627	24.8619	24.5228	24.8296	P0A6A3	Acetate kinase
0	2.14182	0.847152	ispH	34.774	84.319	95803000	18	18.8531	NaN	18.9898	19.6034	19.7813	19.9212	P62623	4-hydroxy-3-methylbut-2-enyl diphosphate reductase
0	1.6077	0.846098	hscA	65.652	188.04	376360000	45	20.3706	19.8311	20.4372	21.0025	21.3352	20.8394	P0A6Z1	Chaperone protein HscA
0	3.93604	0.839502		67.355	323.31	1313800000	113	21.6644	21.6392	21.4859	22.4469	22.4298	22.4312	P0DTT0
0	3.31455	0.824028	hflD	22.947	32.17	81308000	17	18.5818	18.8481	18.7621	19.5601	19.5324	19.5715	P25746	High frequency lysogenization protein HflD
0	1.37019	0.800943	surA	47.283	323.31	789250000	80	21.7243	20.8548	21.354	22.1295	21.9217	22.2847	P0ABZ6	Chaperone SurA
0	1.41735	0.797496	mukB	170.23	323.31	739920000	111	20.119	20.199	19.3926	20.6268	20.6718	20.8045	P22523	Chromosome partition protein MukB
0	2.56764	0.795934	rcsB	23.67	124.06	204800000	19	20.1708	20.1797	20.4109	21.1484	21.1331	20.8678	P0DMC7	Transcriptional regulatory protein RcsB
0	1.80079	0.794626	mnmA	40.959	72.236	195240000	21	19.5624	20.0461	19.6099	20.3046	20.5684	20.7292	P25745	tRNA-specific 2-thiouridylase MnmA
0	3.14494	0.78874	clpA	84.206	323.31	1015600000	121	21.5516	21.5453	21.4177	22.3264	22.3982	22.1562	P0ABH9	ATP-dependent Clp protease ATP-binding subunit ClpA
0	0.998727	0.779126	lipA	36.071	124.52	769360000	63	21.879	21.1735	22.4341	22.6589	22.6065	22.5586	P60716	Lipoyl synthase
0	1.63938	0.778138	narH	58.066	100.38	220770000	51	19.7945	19.2067	19.8354	20.2613	20.3868	20.523	P11349	Respiratory nitrate reductase 1 beta chain
0	1.07698	0.76653	rhlB	47.125	85.17	207050000	38	19.1686	19.9731	20.1275	20.2641	20.7953	20.5094	P0A8J8	ATP-dependent RNA helicase RhlB
0	1.86298	0.752915	ndh	47.358	254.42	873890000	114	22.0426	21.6634	21.5824	22.6055	22.2975	22.6443	P00393	NADH dehydrogenase
0	2.58643	0.751314	murA	44.817	111.3	294160000	35	20.0154	20.2256	20.0415	20.6748	20.8778	20.9838	P0A749	UDP-N-acetylglucosamine 1-carboxyvinyltransferase
0	4.08158	0.729895	deaD	70.545	323.31	1805700000	128	22.589	22.7229	22.675	23.435	23.3652	23.3764	P0A9P6	ATP-dependent RNA helicase DeaD
0	4.81481	0.71967	pmbA	48.369	249.56	502430000	67	20.9384	21.0004	20.9028	21.6582	21.6704	21.672	P0AFK0	Metalloprotease PmbA
0	1.68736	0.687938	sohB	39.366	179.26	65091000	15	19.0861	NaN	19.3586	19.9967	19.733	20.0011	P0AG14	Probable protease SohB
0	1.40472	0.685869	gatA	16.907	75.625	203820000	22	20.8282	20.6471	NaN	21.2712	21.2914	21.708	P69828	Galactitol-specific phosphotransferase enzyme IIA component
0	2.12906	0.680051	asnS	52.57	299.94	1303700000	115	21.4132	21.6479	21.5062	21.981	22.2466	22.38	P0A8M0	Asparagine--tRNA ligase
0	1.33042	0.671676	ompR	27.353	82.646	267260000	44	20.5078	20.7213	20.5603	21.1211	21.7143	20.969	P0AA16	Transcriptional regulatory protein OmpR
0	2.41369	0.657286	glpA	58.958	320.46	1608000000	165	21.8261	21.6636	22.0241	22.5303	22.4293	22.5261	P0A9C0	Anaerobic glycerol-3-phosphate dehydrogenase subunit A
0	1.60842	0.641813	preT	44.329	62.777	78472000	17	18.8971	NaN	18.6766	19.5192	19.2294	19.5374	P76440	NAD-dependent dihydropyrimidine dehydrogenase subunit PreT
0	2.23409	0.628018	cysK	34.489	303.32	857510000	72	21.6199	21.4228	21.6503	22.0392	22.1779	22.36	P0ABK5	Cysteine synthase A
0	0.828214	0.625587	asd	40.017	212.92	230340000	28	20.2006	20.6654	19.6803	20.4294	21.1296	20.864	P0A9Q9	Aspartate-semialdehyde dehydrogenase
0	1.76577	0.623351	fnr	27.967	63.988	196540000	16	20.4373	20.1749	20.5616	21.1184	21.1316	20.7938	P0A9E5	Fumarate and nitrate reduction regulatory protein
0	1.34058	0.622992	aroK	19.538	75.92	248450000	30	20.1316	NaN	20.482	21.0471	20.7193	21.0228	P0A6D7	Shikimate kinase 1
0	2.53115	0.621142	tdh	37.239	49.654	166310000	26	20.4699	20.2233	20.5244	21.0538	20.9764	21.0508	P07913	L-threonine 3-dehydrogenase
0	1.09627	0.621	ubiE	28.073	93.613	195380000	33	20.4109	19.9418	19.8162	20.7211	20.9918	20.319	P0A887	Ubiquinone/menaquinone biosynthesis C-methyltransferase UbiE
0	1.04301	0.615066	cysS	52.202	84.226	159930000	39	19.8169	18.9551	19.7354	20.1724	20.1297	20.0505	P21888	Cysteine--tRNA ligase
0	2.25201	0.6071	ppiD	68.149	306.2	682650000	102	20.3266	20.6902	20.4607	21.0289	21.1318	21.1381	P0ADY1	Peptidyl-prolyl cis-trans isomerase D
0	0.986544	0.606298	pcnB	53.87	53.009	155760000	30	19.694	18.8448	19.1991	20.1476	19.663	19.7463	P0ABF1	Poly(A) polymerase I
0	1.22697	0.600978	grpE	21.798	82.257	298300000	32	21.0566	21.6356	21.1135	21.6168	21.9008	22.0911	P09372	Protein GrpE
0	1.31114	0.597249	yfeX	33.052	62.533	173010000	28	20.3841	20.6968	19.9627	20.9628	20.9117	20.9608	P76536	Probable deferrochelatase/peroxidase YfeX
0	1.69978	0.595902	rfbD	32.694	69.168	148660000	29	19.4697	19.5799	19.3663	20.0691	20.321	19.8135	P37760	dTDP-4-dehydrorhamnose reductase
0	1.66106	0.595497	ybaL	59.423	52.935	48711000	13	18.1116	18.3053	NaN	18.8349	18.94	18.637	P39830	Inner membrane protein YbaL
0	0.917558	0.580319	lpxD	36.038	75.505	254510000	32	20.9776	20.7319	NaN	21.8216	21.3066	21.1769	P21645	UDP-3-O-(3-hydroxymyristoyl)glucosamine N-acyltransferase
0	3.77392	0.565452	atpD	50.325	323.31	4407600000	310	22.9589	22.935	23.0497	23.5062	23.5836	23.5503	P0ABB4	ATP synthase subunit beta
0	2.19056	0.557311	glyA	45.316	323.31	1265700000	130	22.3763	22.4847	22.2426	22.921	23.067	22.7875	P0A825	Serine hydroxymethyltransferase
0	1.66235	0.552089	rsmA	30.42	57.302	77203000	17	19.2855	19.2359	NaN	19.9402	19.6244	19.8738	P06992	Ribosomal RNA small subunit methyltransferase A
0	2.02226	0.551821	aspS	65.913	323.31	759620000	104	20.6658	20.4069	20.5971	21.0122	21.0265	21.2865	P21889	Aspartate--tRNA ligase
0	0.978371	0.517626	fis	11.24	86.76	367700000	20	23.0795	22.4536	23.133	23.3456	23.2394	23.6341	P0A6R3	DNA-binding protein Fis
0	2.73207	0.514469	rfbC	21.27	29.499	75635000	16	19.3976	19.433	19.3025	19.8145	19.8553	20.0068	P37745	dTDP-4-dehydrorhamnose 3,5-epimerase
0	0.626696	0.512934	ppiC	10.232	21.245	113560000	16	20.5993	19.5454	20.662	20.883	20.8081	20.6545	P0A9L5	Peptidyl-prolyl cis-trans isomerase C
0	1.09022	0.508946	rluC	36.026	49.275	149470000	32	20.0953	19.9795	NaN	20.8164	20.3036	20.5191	P0AA39	Ribosomal large subunit pseudouridine synthase C
0	1.24262	0.489611	kdsA	30.832	105.2	380250000	34	21.5175	21.6043	21.4592	22.0946	22.2822	21.673	P0A715	2-dehydro-3-deoxyphosphooctonate aldolase
0	2.14785	0.482927	thrS	74.013	239.8	1032100000	128	21.538	21.413	21.2196	21.8626	21.8415	21.9153	P0A8M3	Threonine--tRNA ligase
0	1.3532	0.482289	arcA	27.292	82.334	363110000	46	21.2084	21.2683	21.1567	21.6742	21.9857	21.4204	P0A9Q1	Aerobic respiration control protein ArcA
0	0.497073	0.482171	mlaC	23.962	54.509	172990000	26	20.862	19.6932	19.8362	20.4322	20.3758	21.0299	P0ADV7	Probable phospholipid-binding protein MlaC
0	1.9507	0.473415	nanA	32.593	245.92	1160200000	67	22.9939	23.0779	22.7761	23.4344	23.3193	23.5144	P0A6L4	N-acetylneuraminate lyase
0	2.08806	0.473333	accA	35.241	289.66	455870000	62	21.2754	21.1425	21.1536	21.5409	21.8324	21.6183	P0ABD5	Acetyl-coenzyme A carboxylase carboxyl transferase subunit alpha
0	1.27529	0.467478	malK	40.99	125.92	166950000	23	20.5193	NaN	20.5855	20.792	21.1064	21.1612	P68187	Maltose/maltodextrin import ATP-binding protein MalK
0	2.11352	0.466774	acnB	93.497	323.31	2525400000	259	21.8749	21.8957	21.6851	22.1956	22.4142	22.2462	P36683	Aconitate hydratase B
0	2.00099	0.462662	rmlA1	32.693	73.624	271270000	31	20.6334	20.3502	20.3742	20.9195	20.9879	20.8385	P37744	Glucose-1-phosphate thymidylyltransferase 1
0	3.11059	0.459268	gsk	48.448	52.165	107490000	23	19.2301	19.2878	NaN	19.7242	19.6828	19.7477	P0AEW6	Inosine-guanosine kinase
0	3.26374	0.456909	purA	47.344	323.31	1150800000	115	21.5149	21.6069	21.5099	22.0098	22.0522	21.9405	P0A7D4	Adenylosuccinate synthetase
0	1.30939	0.449911	hybC	62.49	138.76	223390000	30	21.035	21.135	21.4811	21.4989	21.7094	21.7927	P0ACE0	Hydrogenase-2 large chain
0	2.83748	0.417075	pheS	36.831	99.864	452310000	60	20.7829	20.7045	20.8528	21.1632	21.1672	21.261	P08312	Phenylalanine--tRNA ligase alpha subunit
0	2.05524	0.415233	ettA	62.442	323.31	827700000	110	21.6943	21.555	21.7686	21.9682	22.1617	22.1336	P0A9W3	Energy-dependent translational throttle protein EttA
0	1.56274	0.410212	adk	23.586	57.094	635340000	59	21.9066	21.6368	21.8913	22.3755	22.0894	22.2005	P69441	Adenylate kinase
0	1.6421	0.407593	seqA	20.315	158.55	349600000	39	21.116	20.8874	21.2594	21.5577	21.483	21.445	P0AFY8	Negative modulator of initiation of replication
0	1.39603	0.404362	djlA	30.579	32.07	43854000	8	18.7497	18.5973	18.4974	19.131	19.1341	18.7924	P31680	DnaJ-like protein DjlA
0	0.494392	0.389491	dadA	47.607	165.68	262250000	43	19.9978	20.9437	20.1381	20.7845	21.0363	20.4273	P0A6J5	D-amino acid dehydrogenase
0	1.66443	0.386545	yegQ	51.193	102.28	233530000	36	20.0989	19.8501	20.2024	20.4673	20.4293	20.4144	P76403	Uncharacterized protease YegQ
0	0.895742	0.386456	ghrB	35.395	35.382	68137000	14	19.7207	19.8646	NaN	20.1371	20.4341	19.9662	P37666	Glyoxylate/hydroxypyruvate reductase B
0	0.966282	0.386058	wbbK	43.188	33.389	89361000	19	19.1259	19.0109	18.6939	19.0883	19.5567	19.3438	P37751	Putative glycosyltransferase WbbK
0	1.30858	0.386033	nanE	24.073	59.504	194460000	28	20.4332	20.2252	20.2829	20.7888	20.8548	20.4557	P0A761	Putative N-acetylmannosamine-6-phosphate 2-epimerase
0	0.905666	0.375038	pepN	98.918	151.64	313300000	65	20.7824	20.5072	20.2453	20.8222	21.1106	20.7271	P04825	Aminopeptidase N
0	1.50376	0.361801	fklB	22.216	84.393	286980000	27	21.0876	20.9147	20.9653	21.5149	21.3645	21.1737	P0A9L3	FKBP-type 22 kDa peptidyl-prolyl cis-trans isomerase
0	0.338913	0.3557	ibpA	15.774	29.384	172300000	25	20.4764	20.7077	20.5557	20.7345	21.7575	20.315	P0C054	Small heat shock protein IbpA
0	0.594858	0.33037	yebC	26.422	40.356	209110000	29	20.5564	20.8066	20.3612	21.2173	20.9982	20.4999	P0A8A0	Probable transcriptional regulatory protein YebC
0	0.48064	0.329445	folD	31.043	30.395	104150000	23	20.1734	19.6399	19.3373	20.3082	19.7273	20.1034	P24186	Bifunctional protein FolD;Methylenetetrahydrofolate dehydrogenase;Methenyltetrahydrofolate cyclohydrolase
0	1.26059	0.322455	msbA	64.46	309.26	336740000	50	21.082	21.3051	20.9267	21.3367	21.5028	21.4417	P60752	Lipid A export ATP-binding/permease protein MsbA
0	1.02983	0.314168	sucB	44.011	161.87	842970000	63	22.0106	22.2811	21.7966	22.3762	22.37	22.2847	P0AFG6	Dihydrolipoyllysine-residue succinyltransferase component of 2-oxoglutarate dehydrogenase complex
0	0.670507	0.314069	solA	40.902	22.507	60833000	12	18.6817	NaN	19.0896	19.0458	19.1658	19.3876	P40874	N-methyl-L-tryptophan oxidase
0	0.549374	0.300357	dxs	67.616	52.626	71659000	13	18.6061	18.8524	NaN	18.8864	19.3551	18.8473	P77488	1-deoxy-D-xylulose-5-phosphate synthase
0	0.410001	0.297623	rbfA	15.154	31.312	177450000	13	20.5727	20.8682	20.8721	20.5047	21.2199	21.4814	P0A7G2	Ribosome-binding factor A
0	1.17999	0.295331	yjjI	58.019	43.208	67389000	16	18.8687	18.7313	19.1117	19.2078	19.2612	19.1287	P37342	Uncharacterized protein YjjI
0	0.745963	0.279104	argS	64.682	214.03	433780000	57	20.4933	20.4089	20.8856	20.8558	20.7313	21.038	P11875	Arginine--tRNA ligase
0	1.2505	0.277277	metK	41.951	187.45	1214400000	87	22.6955	22.6869	22.4847	22.8111	23.0552	22.8325	P0A817	S-adenosylmethionine synthase
0	0.304387	0.275345	sdhB	26.77	63.918	233420000	45	20.8525	20.3111	19.9833	20.5405	21.1676	20.2649	P07014	Succinate dehydrogenase iron-sulfur subunit
0	0.844826	0.275245	ispG	40.683	134.91	298850000	48	20.1928	20.0425	20.4995	20.4751	20.6561	20.4293	P62620	4-hydroxy-3-methylbut-2-en-1-yl diphosphate synthase (flavodoxin)
0	0.313511	0.273943	ydfG	27.249	63.679	152960000	17	19.9111	NaN	20.6525	20.2513	20.7976	20.6183	P39831	NADP-dependent 3-hydroxy acid dehydrogenase YdfG
0	0.553732	0.252648	bamA	90.552	284.43	718800000	83	20.9552	21.524	21.3319	21.2974	21.61	21.6616	P0A940	Outer membrane protein assembly factor BamA
0	0.388853	0.249503	tgt	42.593	61.088	144390000	23	19.9798	20.2913	NaN	20.6141	20.029	20.512	P0A847	Queuine tRNA-ribosyltransferase
0	0.278318	0.241685	rhlE	49.989	57.987	99120000	27	19.2721	18.4603	19.1931	18.8853	19.0948	19.6704	P25888	ATP-dependent RNA helicase RhlE
0	1.09336	0.240467	htpX	31.923	14.212	61266000	7	19.2097	19.4688	19.3329	19.4429	19.6861	19.6038	P23894	Protease HtpX
0	0.235076	0.240428	hsdS	51.395	55.553	88839000	19	18.6136	19.3686	NaN	19.5346	18.8277	19.3323	P05719	Type-1 restriction enzyme EcoKI specificity protein
0	0.452998	0.236689	hflC	37.649	38.087	75853000	25	18.5741	19.2144	19.0866	19.2941	19.3182	18.9728	P0ABC3	Modulator of FtsH protease HflC
0	0.456627	0.236378	greA	17.641	40.138	284200000	29	20.8742	21.0948	20.4609	21.2734	21.0186	20.8471	P0A6W5	Transcription elongation factor GreA
0	0.633408	0.229989	bcp	17.634	151.05	317400000	44	21.2205	20.8939	20.6651	21.2126	21.1201	21.1368	P0AE52	Putative peroxiredoxin bcp
0	0.884347	0.226704	dsdA	47.9	56.182	89794000	21	19.4681	19.0571	19.2842	19.5195	19.4889	19.4811	P00926	D-serine dehydratase
0	1.04633	0.21987	leuS	97.233	323.31	1021900000	139	21.3202	21.3295	21.5836	21.5406	21.7038	21.6486	P07813	Leucine--tRNA ligase
0	0.518574	0.213379	ybjS	38.085	119.67	303040000	38	NaN	21.2008	21.4984	21.7561	21.4103	21.5225	P75821	Uncharacterized protein YbjS
0	0.712996	0.204502	thiI	54.972	70.931	160670000	31	19.994	19.7657	19.7909	20.2265	20.0859	19.8517	P77718	tRNA sulfurtransferase
0	0.290892	0.186559	rimO	49.581	98.693	214190000	41	20.1863	20.9508	20.5602	20.605	21.0246	20.6274	P0AEI4	Ribosomal protein S12 methylthiotransferase RimO
0	0.562305	0.181274	glmS	66.894	307.28	688910000	84	21.6257	21.6241	21.9499	21.7748	21.8768	22.092	P17169	Glutamine--fructose-6-phosphate aminotransferase [isomerizing]
0	0.121515	0.176481	pepT	44.923	26.915	66221000	14	18.4302	19.3546	18.647	19.5166	19.3542	18.0905	P29745	Peptidase T
0	0.327113	0.175025	slyD	20.853	293.43	2405200000	132	24.7587	25.4616	24.9152	25.1336	25.2051	25.3219	P0A9K9	FKBP-type peptidyl-prolyl cis-trans isomerase SlyD
0	0.355572	0.17001	frdA	65.971	242.55	410250000	67	20.7028	20.8525	20.2761	20.9678	20.6322	20.7414	P00363	Fumarate reductase flavoprotein subunit
0	0.57652	0.169328	maeB	82.416	273.34	595170000	93	20.8557	21.2333	20.8447	21.1924	21.0959	21.1533	P76558	NADP-dependent malic enzyme
0	0.96593	0.16835	rpoB	150.63	323.31	9545400000	606	23.5981	23.7076	23.4353	23.7099	23.7585	23.7777	P0A8V2	DNA-directed RNA polymerase subunit beta
0	0.200269	0.16631	menB	31.633	122.68	114490000	17	NaN	20.2369	20.4206	20.0336	20.8074	20.6441	P0ABU0	1,4-dihydroxy-2-naphthoyl-CoA synthase
0	0.185081	0.161882	ycfP	21.226	37.239	82008000	19	20.1741	NaN	19.5878	20.1782	20.2767	19.6737	P0A8E1	UPF0227 protein YcfP
0	0.646345	0.14032	valS	108.19	323.31	2431400000	152	27.1321	27.0976	27.0252	27.0676	27.219	27.3892	P07118	Valine--tRNA ligase
0	0.246061	0.133114	acrR	24.766	19.265	34116000	8	18.9989	18.9832	NaN	19.4445	18.9368	18.9912	P0ACS9	HTH-type transcriptional regulator AcrR
0	0.346589	0.128501	dacA	44.443	69.279	140160000	34	19.7805	19.8216	20.1283	19.8357	20.2025	20.0777	P0AEB2	D-alanyl-D-alanine carboxypeptidase DacA
0	0.534678	0.095301	proA	44.63	84.595	48175000	15	18.9383	NaN	18.8392	18.944	19.084	18.9241	P07004	Gamma-glutamyl phosphate reductase
0	0.266176	0.079092	nuoC	68.235	184.23	606250000	93	21.1618	21.3081	20.952	21.1955	21.3309	21.1328	P33599	NADH-quinone oxidoreductase subunit C/D
0	0.0438786	0.0701237	lptF	40.357	11.386	25902000	8	18.9554	NaN	19.106	18.5928	19.6089	NaN	P0AF98	Lipopolysaccharide export system permease protein LptF
0	0.260169	0.0626551	suhB	29.172	122.32	570220000	64	21.6875	21.5229	21.5107	21.6688	21.7508	21.4895	P0ADG4	Inositol-1-monophosphatase
0	0.146144	0.0583165	aldA	52.272	213.23	840570000	92	21.1822	21.5114	21.3678	21.1848	21.5216	21.53	P25553	Lactaldehyde dehydrogenase
0	0.119239	0.0505384	rpoA	36.511	323.31	2429000000	140	23.4067	23.3435	23.0572	23.5156	23.1317	23.3117	P0A7Z4	DNA-directed RNA polymerase subunit alpha
0	0.200974	0.0498075	mlaA	28.041	10.457	51223000	10	20.0806	19.9105	19.8389	20.0063	NaN	19.9799	P76506	Probable phospholipid-binding lipoprotein MlaA
0	0.124694	0.0492315	dksA	17.528	55.423	167190000	21	20.9843	21.3189	NaN	21.3035	21.1487	21.1503	P0ABS1	RNA polymerase-binding transcription factor DksA
0	0.189528	0.0429916	rne	118.2	323.31	907330000	137	21.4062	21.2434	21.488	21.4034	21.5142	21.3489	P21513	Ribonuclease E
0	0.0650707	0.039608	ribC	23.445	48.343	92056000	21	20.0255	19.6526	20.1195	20.2729	19.8989	19.7446	P0AFU8	Riboflavin synthase
0	0.167949	0.0349735	ldhA	36.534	28.308	77250000	14	19.6624	NaN	19.8371	19.749	19.7579	19.8472	P52643	D-lactate dehydrogenase
0	0.0859149	0.0326951	hslO	32.534	173.69	248230000	39	20.7907	21.1178	20.8149	21.1078	20.8778	20.8358	P0A6Y5	33 kDa chaperonin
0	0.0414204	0.0208721	hypB	31.565	33.694	54033000	16	19.6316	19.4139	19.1021	19.4892	19.4698	19.2512	P0AAN3	Hydrogenase isoenzymes nickel incorporation protein HypB
0	0.0759018	0.0177956	hldD	34.893	141.76	504700000	61	21.1887	21.359	21.3568	21.3135	21.2182	21.4262	P67910	ADP-L-glycero-D-manno-heptose-6-epimerase
0	0.0553512	0.00923411	rpsB	26.743	323.31	7337000000	277	25.5365	25.5591	25.3984	25.4833	25.5633	25.4752	P0A7V0	30S ribosomal protein S2
0	7.41323e-05	-3.94185e-05	dnaJ	41.1	153.38	453760000	50	22.1904	22.246	22.724	22.393	22.4462	22.3211	P08622	Chaperone protein DnaJ
0	0.00361326	-0.00113678	tolB	45.955	38.568	83167000	17	19.0641	19.0549	18.8966	19.1776	18.9347	18.8999	P0A855	Protein TolB
0	0.00789892	-0.00311152	fumA	60.298	323.31	1443200000	81	24.0897	24.2857	24.1313	24.0247	24.3935	24.0792	P0AC33	Fumarate hydratase class I, aerobic
0	0.00846947	-0.00336774	hisS	47.029	240.47	414880000	64	20.884	20.5499	20.8904	20.8224	20.8527	20.639	P60906	Histidine--tRNA ligase
0	0.00330453	-0.00355625	nuoA	16.457	9.1059	58155000	10	20.6622	21.1917	20.3882	20.9611	NaN	20.5265	P0AFC3	NADH-quinone oxidoreductase subunit A
0	0.026789	-0.00527891	alaS	96.031	323.31	1405800000	189	21.8743	21.8297	21.6959	21.8088	21.8534	21.7218	P00957	Alanine--tRNA ligase
0	0.080795	-0.0212987	yahK	37.978	14.45	39057000	11	18.8921	NaN	18.9901	18.8645	18.8462	19.0487	P75691	Aldehyde reductase YahK
0	0.0403119	-0.0248979	rpsE	17.603	323.31	6462400000	267	25.6123	25.0861	25.1252	25.4652	25.2494	25.0344	P0A7W1	30S ribosomal protein S5
0	0.0785913	-0.0342404	tldD	51.363	46.372	74736000	19	19.5634	19.7336	NaN	19.4039	19.7352	19.7037	P0AGG8	Metalloprotease TldD
0	0.0468421	-0.0422554	crl	15.655	12.985	44039000	9	19.9129	19.1652	19.5637	19.2941	19.9461	19.2747	P24251	Sigma factor-binding protein Crl
0	0.0578238	-0.0431862	ribE	16.156	121.54	197560000	18	21.8572	21.2719	21.4589	21.7066	21.1032	21.6486	P61714	6,7-dimethyl-8-ribityllumazine synthase
0	0.23516	-0.0491613	talB	35.219	251.69	1432900000	124	22.2862	22.4208	22.3107	22.1641	22.4098	22.2964	P0A870	Transaldolase B
0	0.237674	-0.0492179	fabD	32.417	196.76	630120000	55	22.199	22.2425	22.0509	22.0556	22.2294	22.0598	P0AAI9	Malonyl CoA-acyl carrier protein transacylase
0	0.104425	-0.050492	sucA	105.06	323.31	837100000	109	21.5249	21.9885	21.4633	21.6082	21.701	21.516	P0AFG3	2-oxoglutarate dehydrogenase E1 component
0	0.166317	-0.0505238	mnmG	69.52	104.29	298420000	52	21.064	20.7776	20.7414	20.8415	20.8809	20.7091	P0A6U3	tRNA uridine 5-carboxymethylaminomethyl modification enzyme MnmG
0	0.0815914	-0.0508003	srmB	49.914	80.247	171050000	28	20.6964	20.2633	20.6214	20.3881	20.8132	20.2274	P21507	ATP-dependent RNA helicase SrmB
0	0.201682	-0.0550779	iscS	45.089	192.21	1243300000	121	22.6991	22.6493	22.6	22.7881	22.5492	22.4459	P0A6B7	Cysteine desulfurase IscS
0	0.0164175	-0.0601476	rpsQ	9.7043	23.206	627020000	24	25.491	22.6697	22.1827	24.5247	22.298	23.3403	P0AG63	30S ribosomal protein S17
0	0.0435501	-0.0693137	lpxA	28.08	151.43	722340000	47	22.7625	22.9601	24.3813	23.2372	23.0102	23.6484	P0A722	Acyl-[acyl-carrier-protein]--UDP-N-acetylglucosamine O-acyltransferase
0	0.230625	-0.0777346	gadA	52.685	323.31	865320000	93	22.0765	21.9551	21.7166	21.6841	21.9474	21.8835	P69908	Glutamate decarboxylase alpha
0	0.351926	-0.0801512	rpoC	155.16	323.31	7910000000	587	23.9121	23.9429	23.6449	23.7517	23.7496	23.7581	P0A8T7	DNA-directed RNA polymerase subunit beta
0	0.31961	-0.0860891	nuoB	25.056	36.954	87595000	13	NaN	20.4347	20.464	20.3367	20.5172	20.236	P0AFC7	NADH-quinone oxidoreductase subunit B
0	0.254698	-0.0898962	yfcZ	10.318	14.217	78186000	9	20.7223	20.479	NaN	20.4696	20.5519	NaN	P0AD33	UPF0381 protein YfcZ
0	0.245795	-0.0967986	tktA	72.211	185.83	700660000	112	21.6762	21.2979	21.6439	21.3106	21.6337	21.3833	P27302	Transketolase 1
0	0.269443	-0.105219	ycgL	12.414	8.7321	24300000	7	18.7078	NaN	18.7938	18.7936	18.7236	18.4195	P0AB43	Protein YcgL
0	0.635168	-0.10604	ileS	104.3	235.69	852160000	130	21.6488	21.5235	21.6117	21.3732	21.493	21.5998	P00956	Isoleucine--tRNA ligase
0	0.294135	-0.107514	gpmB	24.065	13.349	26058000	10	18.7644	18.7584	18.4737	18.6476	18.6925	18.3339	P0A7A2	Probable phosphoglycerate mutase GpmB
0	0.338936	-0.117479	ybbN	31.791	77.357	144530000	30	19.8111	20.1894	20.0604	19.8703	20.0733	19.7649	P77395	Uncharacterized protein YbbN
0	0.737424	-0.121731	dapD	29.892	121.9	680950000	81	21.8144	21.984	21.7262	21.7143	21.7218	21.7233	P0A9D8	2,3,4,5-tetrahydropyridine-2,6-dicarboxylate N-succinyltransferase
0	0.243895	-0.125566	wzzB	36.454	30.437	104810000	20	20.1803	NaN	19.9137	20.1853	19.7723	19.8067	P76372	Chain length determinant protein
0	0.0877592	-0.129648	dld	64.612	46.933	75793000	28	19.9555	18.3233	19.2617	19.4852	18.9495	18.7168	P06149	D-lactate dehydrogenase
0	0.700373	-0.136879	prlC	77.166	247.97	392740000	68	21.3322	21.053	21.2143	21.0001	21.1293	21.0594	P27298	Oligopeptidase A
0	0.276459	-0.137402	mgtA	99.465	172.37	173920000	37	NaN	20.6235	20.2109	20.4332	20.1178	20.2883	P0ABB8	Magnesium-transporting ATPase, P-type 1
0	0.726678	-0.146542	yfiF	37.784	72.384	189460000	24	20.8626	20.7095	20.8915	20.6255	20.5801	20.8184	P0AGJ5	Uncharacterized tRNA/rRNA methyltransferase YfiF
0	0.421316	-0.154454	fadL	48.541	82.793	222470000	35	21.5201	21.8491	21.5696	21.4019	21.3477	21.7259	P10384	Long-chain fatty acid transport protein
0	0.16096	-0.156136	dcrB	19.787	38.705	129540000	20	20.8414	20.1174	20.5868	20.7629	19.7817	20.5327	P0AEE1	Protein DcrB
0	0.52536	-0.156565	nirB	93.12	185.95	342710000	80	20.6187	20.3265	20.2116	20.1477	20.3199	20.2195	P08201	Nitrite reductase (NADH) large subunit
0	0.402057	-0.166898	betB	52.911	264.07	377180000	48	21.3743	21.5256	21.1517	21.0106	21.457	21.0834	P17445	NAD/NADP-dependent betaine aldehyde dehydrogenase
0	0.584413	-0.16824	hpt	20.115	89.728	74436000	22	20.6967	20.6672	20.6354	20.5068	20.2737	20.7141	P0A9M2	Hypoxanthine phosphoribosyltransferase
0	0.331246	-0.168313	rsfS	11.582	11.806	50155000	10	19.6737	20.0952	NaN	19.9123	19.5989	19.6371	P0AAT6	Ribosomal silencing factor RsfS
0	0.262941	-0.177874	ylaC	18.267	70.996	93234000	13	20.883	NaN	20.4519	20.3656	20.2956	20.8076	P0AAS0	Inner membrane protein YlaC
0	0.433675	-0.17823	hflK	45.544	142.92	259620000	37	20.9763	21.4054	21.2453	20.7884	21.1945	21.1094	P0ABC7	Modulator of FtsH protease HflK
0	1.18308	-0.187727	tyrS	47.526	278.67	982560000	91	22.4353	22.669	22.4937	22.3953	22.3201	22.3195	P0AGJ9	Tyrosine--tRNA ligase
0	1.24447	-0.194098	accC	49.32	187.8	1014500000	109	22.274	22.099	22.1163	21.8749	22.0285	22.0036	P24182	Biotin carboxylase
0	0.962993	-0.198217	nfsB	23.905	56.919	76488000	21	19.8877	19.7686	19.6544	19.6484	19.6332	19.4344	P38489	Oxygen-insensitive NAD(P)H nitroreductase
0	0.132154	-0.203523	ppiB	18.153	16.224	120060000	15	NaN	20.6607	20.6908	21.0638	19.6385	20.7143	P23869	Peptidyl-prolyl cis-trans isomerase B
0	1.12142	-0.20697	atpA	55.221	323.31	2523200000	194	22.7937	23.0412	22.8983	22.6122	22.7787	22.7214	P0ABB0	ATP synthase subunit alpha
0	0.189415	-0.207047	glpR	28.048	80.532	150990000	22	20.5068	NaN	21.5581	20.996	20.7089	20.7714	P0ACL0	Glycerol-3-phosphate regulon repressor
0	0.32539	-0.209396	yhcB	14.961	55.052	158140000	35	20.8558	20.1524	20.9332	20.5235	20.2564	20.5333	P0ADW3	Inner membrane protein YhcB
0	1.71342	-0.216183	tolC	53.74	175.32	340170000	62	21.0808	21.039	20.9854	20.7253	20.8354	20.8961	P02930	Outer membrane protein TolC
0	0.607425	-0.219868	nuoF	49.292	89.025	166200000	21	20.4987	20.5149	20.6735	20.2525	20.6397	20.1353	P31979	NADH-quinone oxidoreductase subunit F
0	0.507934	-0.219936	rplA	24.729	185.58	4607700000	155	25.8419	25.4678	25.6673	25.6173	25.1287	25.5712	P0A7L0	50S ribosomal protein L1
0	0.35419	-0.221523	prmB	35.001	11.994	31847000	11	18.9623	NaN	19.1256	18.827	19.1467	18.4935	P39199	50S ribosomal protein L3 glutamine methyltransferase
0	0.843405	-0.221666	aceF	66.095	323.31	9101200000	488	24.669	24.9365	24.5566	24.5721	24.5133	24.4117	P06959	Dihydrolipoyllysine-residue acetyltransferase component of pyruvate dehydrogenase complex
0	1.00512	-0.22413	gpmI	56.193	274.68	660300000	68	22.0568	22.3337	22.2258	21.9096	21.9197	22.1146	P37689	2,3-bisphosphoglycerate-independent phosphoglycerate mutase
0	0.419802	-0.235686	uspA	16.066	61.092	152020000	26	21.416	NaN	20.806	20.8697	20.8343	20.9219	P0AED0	Universal stress protein A
0	1.8731	-0.244073	rdgC	33.993	38.56	64403000	20	19.0984	19.0204	19.118	18.93	18.8105	18.764	P36767	Recombination-associated protein RdgC
0	0.811922	-0.244714	ansB	36.85	129.71	192920000	40	20.23	20.6399	20.5961	20.2342	20.3361	20.1615	P00805	L-asparaginase 2
0	0.834733	-0.248919	yidC	61.525	270.24	691850000	63	22.7937	22.4185	22.5157	22.3107	22.474	22.1964	P25714	Membrane protein insertase YidC
0	1.08106	-0.257432	thrA	89.119	241.14	315540000	66	20.9943	20.8148	20.8737	20.6505	20.8005	20.4594	P00561	Bifunctional aspartokinase/homoserine dehydrogenase 1;Aspartokinase;Homoserine dehydrogenase
0	0.379118	-0.274419	secB	17.277	262.65	1080800000	41	24.5203	23.7415	23.6312	23.9214	23.5273	23.621	P0AG86	Protein-export protein SecB
0	1.03645	-0.277583	galE	37.265	80.439	71544000	21	NaN	19.9679	19.955	19.5212	19.8224	19.708	P09147	UDP-glucose 4-epimerase
0	0.633891	-0.280334	rlmI	44.356	37.106	76744000	18	19.525	NaN	19.3756	19.0087	19.0546	19.4466	P75876	Ribosomal RNA large subunit methyltransferase I
0	0.575254	-0.301749	groS	10.387	26.888	699170000	30	23.3947	23.4483	22.8685	23.1026	22.6519	23.0518	P0A6F9	10 kDa chaperonin
0	1.81457	-0.302731	fdoG	112.55	273.56	470680000	95	21.554	21.6556	21.7009	21.2463	21.3057	21.4503	P32176	Formate dehydrogenase-O major subunit
0	0.848168	-0.310226	add	36.397	70.002	100760000	18	20.6674	NaN	20.9445	20.3904	20.6773	20.4196	P22333	Adenosine deaminase
0	0.276928	-0.316492	asnA	36.65	50.709	80467000	16	21.3367	20.1675	NaN	20.4534	20.3043	20.5491	P00963	Aspartate--ammonia ligase
0	1.00683	-0.321892	ahpF	56.176	130.74	735400000	71	22.562	22.4006	22.0603	22.0013	22.0689	21.9869	P35340	Alkyl hydroperoxide reductase subunit F
0	0.587508	-0.323226	rbsK	32.29	187.69	171610000	23	20.179	20.9457	20.3905	20.354	20.0518	20.1397	P0A9J6	Ribokinase
0	1.42215	-0.323432	glnB	12.425	7.9507	20208000	8	19.4661	NaN	19.3375	19.0709	NaN	19.0858	P0A9Z1	Nitrogen regulatory protein P-II 1
0	0.370687	-0.324113	ybiS	33.325	73.736	158740000	17	21.3915	20.2795	21.1926	20.4766	20.5269	20.8876	P0AAX8	Probable L,D-transpeptidase YbiS
0	1.03919	-0.329287	degP	49.354	323.31	1126000000	103	22.7616	22.7464	23.025	22.4741	22.334	22.7372	P0C0V0	Periplasmic serine endoprotease DegP
0	1.47798	-0.335115	fkpA	28.882	101.04	280760000	46	21.0195	20.9488	21.2554	20.7392	20.6538	20.8254	P45523	FKBP-type peptidyl-prolyl cis-trans isomerase FkpA
0	0.331175	-0.343004	ibpB	16.093	22.478	78037000	19	20.5815	20.7685	19.6383	20.2017	20.2587	19.499	P0C058	Small heat shock protein IbpB
0	0.244532	-0.348187	ygiB	23.479	11.098	15289000	6	17.8558	NaN	18.7224	18.2214	17.6605	NaN	P0ADT2	UPF0441 protein YgiB
0	1.98725	-0.364573	acrA	42.196	93.21	272630000	61	20.9629	20.7031	20.8418	20.5211	20.4271	20.4659	P0AE06	Multidrug efflux pump subunit AcrA
0	0.451368	-0.366542	dut	16.286	27.605	112750000	12	NaN	22.1265	21.297	21.4235	21.465	21.1472	P06968	Deoxyuridine 5-triphosphate nucleotidohydrolase
0	0.838638	-0.37446	narG	140.49	323.31	698560000	122	21.81	22.2753	21.9371	21.3531	21.6625	21.8834	P09152	Respiratory nitrate reductase 1 alpha chain
0	0.88845	-0.39193	ydjA	20.059	32.962	77700000	14	20.2475	20.2709	20.1358	20.202	19.5132	19.7632	P0ACY1	Putative NAD(P)H nitroreductase YdjA
0	0.909542	-0.392629	sdhA	64.421	323.31	597730000	79	21.9809	22.0854	21.6326	21.4882	21.772	21.2608	P0AC41	Succinate dehydrogenase flavoprotein subunit
0	2.96023	-0.39291	gnd	51.481	323.31	1906700000	134	23.2597	23.1882	23.1195	22.7571	22.8381	22.7936	P00350	6-phosphogluconate dehydrogenase, decarboxylating
0	1.1528	-0.401424	mscS	30.896	81.608	150710000	22	20.4983	20.6612	20.7129	19.9327	20.2982	20.4373	P0C0S1	Small-conductance mechanosensitive channel
0	1.04777	-0.41197	feoB	84.473	42.356	51793000	15	19.7523	19.9256	19.7098	19.1103	19.3388	19.7028	P33650	Ferrous iron transport protein B
0	1.30406	-0.413543	glf	42.965	137.32	252480000	48	20.694	20.6028	21.0263	20.2164	20.4632	20.4027	P37747	UDP-galactopyranose mutase
0	1.5035	-0.415256	rluB	32.711	38.337	126270000	24	20.4528	20.6871	20.7798	20.2131	20.3735	20.0873	P37765	Ribosomal large subunit pseudouridine synthase B
0	1.58805	-0.417376	yibN	15.596	48.074	195370000	22	21.3348	21.0951	21.4568	20.9256	20.9446	20.7644	P0AG27	Uncharacterized protein YibN
0	0.589778	-0.435747	rpmC	7.2734	126.55	828410000	43	24.5946	24.6214	24.3782	24.6274	24.1409	23.5186	P0A7M6	50S ribosomal protein L29
0	1.12008	-0.436599	rfbB	40.558	62.25	183480000	38	20.8482	20.654	20.3076	20.1057	20.3489	20.0454	P37759	dTDP-glucose 4,6-dehydratase 1
0	2.17907	-0.447044	nusB	15.689	36.083	101260000	21	20.8153	20.7604	20.9772	20.4401	20.4791	20.2927	P0A780	N utilization substance protein B
0	1.06706	-0.450425	pepA	54.879	52.449	111440000	25	19.8238	20.2157	20.1307	19.3489	19.8959	19.5742	P68767	Cytosol aminopeptidase
0	0.898893	-0.450456	yccF	16.275	14.16	31649000	8	19.4948	19.154	NaN	18.825	18.9228	NaN	P0AB12	Inner membrane protein YccF
0	1.49399	-0.456576	psd	35.934	17.281	25383000	5	19.6745	NaN	19.5325	19.1025	NaN	19.1914	P0A8K1	Phosphatidylserine decarboxylase proenzyme;Phosphatidylserine decarboxylase alpha chain;Phosphatidylserine decarboxylase beta chain
0	1.11709	-0.460058	purU	31.934	21.543	43722000	9	20.1044	NaN	19.662	19.5039	19.388	19.3776	P37051	Formyltetrahydrofolate deformylase
0	1.87157	-0.460192	mdoG	57.912	50.472	129770000	25	20.0642	20.1076	19.9883	19.5836	19.7766	19.4194	P33136	Glucans biosynthesis protein G
0	0.62034	-0.460558	infC	20.564	246.63	539570000	48	23.4767	22.4424	23.0429	22.8016	22.3015	22.4772	P0A707	Translation initiation factor IF-3;Translation initiation factor IF-3, N-terminally processed;Translation initiation factor IF-3S
0	2.78055	-0.473881	lptD	89.67	120.91	239660000	64	20.4499	20.6285	20.5524	20.0118	20.1348	20.0625	P31554	LPS-assembly protein LptD
0	1.61742	-0.475196	mlaD	19.576	69.173	170070000	21	20.8051	21.1243	21.1005	20.6599	20.5765	20.3679	P64604	Probable phospholipid ABC transporter-binding protein MlaD
0	0.893646	-0.478203	rplN	13.541	155.47	2084100000	124	24.79	24.8637	24.5306	24.0595	24.7042	23.9861	P0ADY3	50S ribosomal protein L14
0	1.29144	-0.484036	pntB	48.722	23.19	42034000	12	19.6091	19.6778	NaN	18.9578	19.1567	19.3638	P0AB67	NAD(P) transhydrogenase subunit beta
0	1.35598	-0.484159	lepB	35.96	23.114	71510000	21	19.4214	19.6559	19.0867	18.9454	18.903	18.8631	P00803	Signal peptidase I
0	1.11792	-0.493209	metQ	29.431	38.793	119290000	17	21.8295	21.4002	21.6116	20.7888	21.2637	21.3091	P28635	D-methionine-binding lipoprotein MetQ
0	1.824	-0.496881	secD	66.631	119.95	367340000	66	21.3419	21.7078	21.405	20.9233	20.9663	21.0744	P0AG90	Protein translocase subunit SecD
0	1.21483	-0.508774	gcvP	104.38	323.31	969460000	118	22.3237	22.5347	21.9292	21.673	21.9238	21.6645	P33195	Glycine dehydrogenase (decarboxylating)
0	1.50827	-0.513573	nrdB	43.517	68.986	81018000	23	19.7312	19.3963	19.9035	19.1691	19.2492	19.0721	P69924	Ribonucleoside-diphosphate reductase 1 subunit beta
0	2.15939	-0.519368	ydgH	33.903	36.929	81887000	24	19.76	19.7113	19.8301	19.1619	19.1428	19.4386	P76177	Protein YdgH
0	2.05736	-0.52832	proS	63.692	211.76	603600000	108	21.5537	21.3342	21.4473	20.8018	21.0953	20.8532	P16659	Proline--tRNA ligase
0	1.66679	-0.529777	sdaC	46.906	84.046	430950000	70	22.4248	22.5242	22.3858	21.6958	22.1718	21.8778	P0AAD6	Serine transporter
0	1.67106	-0.530173	dctA	45.436	17.788	149490000	19	21.151	20.9334	20.8664	20.4488	20.6566	20.2549	P0A830	Aerobic C4-dicarboxylate transport protein
0	0.592586	-0.541127	cydB	42.453	9.195	68631000	8	20.8048	21.6428	20.7507	20.6935	19.963	20.9185	P0ABK2	Cytochrome bd-I ubiquinol oxidase subunit 2
0	0.706604	-0.547788	lldP	59.167	10.335	32945000	8	20.2116	20.2477	19.5095	19.5969	19.2868	NaN	P33231	L-lactate permease
0	1.16682	-0.556394	ompC	40.368	146.9	472060000	62	21.8025	21.9627	22.2933	21.1854	21.4277	21.7762	P06996	Outer membrane protein C
0	1.46243	-0.556786	tatA	9.6639	9.217	79171000	10	21.5738	21.2532	21.641	21.1757	20.8908	20.7312	P69428	Sec-independent protein translocase protein TatA
0	2.45987	-0.563072	nagE	68.346	82.526	200020000	36	21.2339	21.073	21.0612	20.5699	20.6788	20.4301	P09323	PTS system N-acetylglucosamine-specific EIICBA component;N-acetylglucosamine permease IIC component;N-acetylglucosamine-specific phosphotransferase enzyme IIB component;N-acetylglucosamine-specific phosphotransferase enzyme IIA component
0	0.472506	-0.56502	ftnA	19.424	138.94	303480000	29	22.8655	22.2393	21.5533	22.1933	20.9884	21.7812	P0A998	Bacterial non-heme ferritin
0	2.1259	-0.569243	nuoG	100.3	186.72	432070000	72	22.0075	22.29	21.9451	21.573	21.5284	21.4334	P33602	NADH-quinone oxidoreductase subunit G
0	2.2854	-0.583295	iscA	11.556	15.729	60320000	13	20.0091	19.7253	19.8601	19.3443	19.1495	19.3508	P0AAC8	Iron-binding protein IscA
0	0.98249	-0.584606	ubiF	42.953	35.695	62121000	13	20.5976	NaN	20.4309	20.0562	19.5559	20.1769	P75728	2-octaprenyl-3-methyl-6-methoxy-1,4-benzoquinol hydroxylase
0	2.44284	-0.588701	rnr	92.108	159.18	284890000	54	21.4245	21.7441	21.6388	21.0539	20.9888	20.9987	P21499	Ribonuclease R
0	0.865539	-0.601655	bamB	41.887	32.852	45983000	13	19.7652	20.6774	20.1028	19.2897	19.5311	19.9196	P77774	Outer membrane protein assembly factor BamB
0	1.4464	-0.606068	rpsC	25.983	314.05	7280500000	179	26.4613	26.0671	25.9795	25.5654	25.7809	25.3434	P0A7V3	30S ribosomal protein S3
0	1.29372	-0.609063	rplJ	17.711	97.76	3897400000	90	25.8976	25.5453	25.5148	25.3695	25.0259	24.7352	P0A7J3	50S ribosomal protein L10
0	1.23406	-0.620237	ompT	35.562	110.79	292440000	51	21.7735	21.402	21.7441	21.3005	20.6235	21.1348	P09169	Protease 7
0	2.06885	-0.620637	srlE	33.332	104.17	115350000	34	20.1461	20.2822	20.4929	19.5456	19.8229	19.6907	P56580	Glucitol/sorbitol-specific phosphotransferase enzyme IIB component
0	2.79838	-0.634806	pgk	41.118	323.31	4328100000	179	24.8009	24.8338	24.8239	24.0912	24.1134	24.3497	P0A799	Phosphoglycerate kinase
0	1.61126	-0.637913	acrB	113.57	111.88	226760000	61	20.1717	20.6505	20.3379	19.5267	19.8099	19.9098	P31224	Multidrug efflux pump subunit AcrB
0	0.582762	-0.638824	secF	35.382	49.865	51556000	18	19.3221	20.8717	20.2809	19.1448	19.7166	19.6967	P0AG93	Protein translocase subunit SecF
0	1.94201	-0.646882	fruA	57.518	90.152	317090000	42	21.6405	21.9987	21.9657	21.041	21.2922	21.3311	P20966	PTS system fructose-specific EIIBC component;Fructose-specific phosphotransferase enzyme IIB component;Fructose permease IIC component
0	2.86965	-0.658208	pepQ	50.176	88.956	196350000	41	20.9373	20.6882	20.8396	20.2255	20.176	20.089	P21165	Xaa-Pro dipeptidase
0	3.30574	-0.661153	rodZ	36.191	73.449	105680000	23	20.1534	20.2952	20.3023	19.635	19.6266	19.5059	P27434	Cytoskeleton protein RodZ
0	1.05385	-0.661373	ompA	37.2	323.31	11004000000	326	26.1311	25.5175	26.2444	25.3181	24.9671	25.6236	P0A910	Outer membrane protein A
0	3.05538	-0.667566	prfB	41.25	120.99	238100000	42	21.0009	21.117	21.1536	20.3526	20.5406	20.3756	P07012	Peptide chain release factor 2
0	1.36153	-0.678595	ssb	18.975	45.409	237130000	23	21.9719	21.9747	22.4633	21.3789	21.7768	21.2185	P0AGE0	Single-stranded DNA-binding protein
0	0.942915	-0.682302	ybhC	46.082	58.844	43308000	16	19.5272	19.9007	NaN	18.7673	18.8737	19.454	P46130	Putative acyl-CoA thioester hydrolase YbhC
0	0.763816	-0.68644	galT	39.645	11.573	16636000	9	18.9027	NaN	18.8737	17.873	NaN	18.5305	P09148	Galactose-1-phosphate uridylyltransferase
0	0.550669	-0.686452	ygiF	48.388	34.155	65466000	16	20.8048	19.7898	20.6539	20.1028	20.2566	18.8296	P30871	Inorganic triphosphatase
0	1.26912	-0.693654	lpoB	22.515	7.6743	31731000	5	20.2643	NaN	19.9697	NaN	19.5037	19.3431	P0AB38	Penicillin-binding protein activator LpoB
0	2.06962	-0.696028	zapD	28.291	22.278	39328000	13	19.7076	19.2764	19.5602	18.7154	18.951	18.7899	P36680	Cell division protein ZapD
0	1.28651	-0.696446	nrfA	53.702	17.819	24027000	9	18.779	NaN	19.1053	17.9875	18.2653	18.4843	P0ABK9	Cytochrome c-552
0	1.55472	-0.696572	bamD	27.829	27.482	65647000	15	20.1007	NaN	19.7122	19.1164	19.3571	19.1561	P0AC02	Outer membrane protein assembly factor BamD
0	1.20532	-0.697718	yidA	29.721	5.5568	35339000	6	19.2113	NaN	19.3065	18.685	18.7996	18.199	P0A8Y5	Sugar phosphatase YidA
0	1.09454	-0.702307	orn	20.815	5.0258	11111000	6	NaN	18.4433	18.4671	17.541	17.9648	NaN	P0A784	Oligoribonuclease
0	2.73328	-0.704203	pepD	52.915	163.46	428980000	64	21.5619	21.4289	21.2919	20.6823	20.8347	20.6532	P15288	Cytosol non-specific dipeptidase
0	1.32462	-0.706514	exbB	26.287	60.409	65858000	21	20.4524	20.3528	20.516	19.5023	19.4755	20.2239	P0ABU7	Biopolymer transport protein ExbB
0	1.77881	-0.709169	tsx	33.589	151	327840000	36	22.3578	21.9719	22.5525	21.4781	21.653	21.6235	P0A927	Nucleoside-specific channel-forming protein tsx
0	2.18845	-0.716024	prc	76.662	39.892	78350000	20	19.6163	19.6317	19.9204	18.9332	18.8909	19.1962	P23865	Tail-specific protease
0	1.60702	-0.716457	erpA	12.1	21.511	74433000	13	21.0418	20.6604	20.8022	20.253	19.7783	20.3237	P0ACC3	Iron-sulfur cluster insertion protein ErpA
0	2.95704	-0.716979	manA	42.849	64.549	78352000	20	19.7605	19.8115	19.8265	18.9324	19.096	19.2193	P00946	Mannose-6-phosphate isomerase
0	2.45588	-0.7251	pckA	59.643	323.31	1150900000	136	22.3925	22.7446	22.4793	21.7509	21.9144	21.7759	P22259	Phosphoenolpyruvate carboxykinase [ATP]
0	1.94691	-0.728422	fdoH	33.1	22.732	36398000	11	19.4153	19.4068	19.2559	18.8972	18.637	18.3586	P0AAJ5	Formate dehydrogenase-O iron-sulfur subunit
0	1.28599	-0.734191	glnH	27.19	23.8	44197000	10	19.3817	NaN	19.5938	18.9353	18.4126	18.9128	P0AEQ3	Glutamine-binding periplasmic protein
0	1.08689	-0.738509	fecA	85.321	57.896	119720000	37	19.7436	20.7008	19.9745	19.3037	19.6723	19.2274	P13036	Fe(3+) dicitrate transport protein FecA
0	0.829472	-0.739089	nfsA	26.8	16.335	39968000	14	20.0178	19.3791	NaN	18.968	19.355	18.5552	P17117	Oxygen-insensitive NADPH nitroreductase
0	2.12862	-0.745008	pgi	61.529	170.94	417340000	73	21.3455	20.9814	21.0734	20.5255	20.4479	20.1918	P0A6T1	Glucose-6-phosphate isomerase
0	1.39479	-0.752474	ddlA	39.315	26.884	50068000	14	20.0394	19.8129	19.459	18.7418	18.939	19.373	P0A6J8	D-alanine--D-alanine ligase A
0	1.50195	-0.755893	secY	48.511	47.334	375380000	30	22.1113	22.6494	22.5322	21.5757	21.9989	21.4506	P0AGA2	Protein translocase subunit SecY
0	1.66813	-0.779924	fabZ	17.033	63.172	335390000	45	22.7888	22.1237	22.4617	21.8615	21.5857	21.5871	P0A6Q6	3-hydroxyacyl-[acyl-carrier-protein] dehydratase FabZ
0	3.33802	-0.781293	pepB	46.18	105.85	152860000	37	20.4921	20.6192	20.4212	19.659	19.7128	19.8168	P37095	Peptidase B
0	1.45749	-0.781424	rpsH	14.126	97.327	3186700000	139	25.4319	24.6384	24.9596	24.2748	24.3635	24.0474	P0A7W7	30S ribosomal protein S8
0	1.58604	-0.786135	yiaF	25.663	22.105	44014000	12	20.0063	19.606	20.1477	19.4456	19.0372	18.9188	P0ADK0	Uncharacterized protein YiaF
0	3.19264	-0.788589	topA	97.349	197.27	310000000	80	20.841	21.0319	20.815	20.0437	20.1932	20.0854	P06612	DNA topoisomerase 1
0	2.48913	-0.788609	yqhD	42.097	28.421	68360000	21	19.8521	19.7025	20.1174	19.1624	19.0621	19.0816	Q46856	Alcohol dehydrogenase YqhD
0	2.24101	-0.792038	malP	90.521	209.88	429760000	94	21.4827	21.9291	21.5989	20.7884	20.9949	20.8514	P00490	Maltodextrin phosphorylase
0	2.52264	-0.795525	efp	20.591	46.086	304600000	38	22.3273	21.9268	22.1497	21.4089	21.2601	21.3482	P0A6N4	Elongation factor P
0	0.744003	-0.801568	eptC	66.609	6.4633	12350000	5	NaN	19.2491	18.8675	NaN	18.6038	17.9096	P0CB39	Phosphoethanolamine transferase EptC
0	1.90319	-0.803742	dusA	38.467	54.287	48632000	16	19.8236	NaN	19.6719	18.9914	18.7399	19.1007	P32695	tRNA-dihydrouridine synthase A
0	1.99174	-0.809917	rpsG	20.019	323.31	4783400000	169	25.684	25.1691	25.5586	24.8294	24.5565	24.5959	P02359	30S ribosomal protein S7
0	0.953238	-0.813594	ompF	39.333	48.929	130900000	33	20.094	21.2462	20.7263	19.5817	19.7372	20.307	P02931	Outer membrane protein F
0	2.37042	-0.813648	crr	18.251	106.84	263570000	24	21.9697	22.3734	22.2818	21.4749	21.4464	21.2627	P69783	Glucose-specific phosphotransferase enzyme IIA component
0	2.41225	-0.819536	proQ	25.892	63.242	247120000	42	21.9773	21.5894	22.0057	21.0786	20.9941	21.0411	P45577	RNA chaperone ProQ
0	1.22737	-0.82011	yraP	20.028	7.3604	12342000	7	18.8828	18.985	19.0396	NaN	17.7867	18.5113	P64596	Uncharacterized protein YraP
0	1.97394	-0.821367	cyoA	34.911	78.155	394590000	32	23.1273	22.6057	22.8606	22.2409	21.983	21.9055	P0ABJ1	Cytochrome bo(3) ubiquinol oxidase subunit 2
0	2.48299	-0.824398	pitA	53.388	27.724	74685000	23	20.2817	19.8842	20.2733	19.3077	19.3292	19.3291	P0AFJ7	Low-affinity inorganic phosphate transporter 1
0	1.29385	-0.82476	pepP	49.815	63.555	49465000	11	20.5586	20.1911	NaN	19.7785	19.2131	19.6587	P15034	Xaa-Pro aminopeptidase
0	1.87313	-0.826093	manZ	30.955	64.842	236370000	36	21.7561	21.9847	21.4019	20.8998	21.0503	20.7143	P69805	Mannose permease IID component
0	1.39372	-0.836004	tatB	18.421	28.236	26412000	10	19.2972	NaN	19.6373	18.6717	18.3383	18.8838	P69425	Sec-independent protein translocase protein TatB
0	1.94153	-0.839511	mipA	27.831	165.87	428870000	43	22.0649	21.8991	22.4782	21.2137	21.2443	21.4657	P0A908	MltA-interacting protein
0	0.953025	-0.848319	malM	31.943	56.086	92009000	24	20.835	19.4417	19.9746	19.3325	19.3261	19.0477	P03841	Maltose operon periplasmic protein
0	2.5194	-0.870389	rplE	20.301	229.32	4243900000	252	25.3187	25.0739	25.2987	24.2736	24.5795	24.2271	P62399	50S ribosomal protein L5
0	0.830461	-0.871998	yqiC	11.276	7.9136	46549000	11	20.7277	19.6812	20.5367	19.6215	18.7403	19.9678	Q46868	Uncharacterized protein YqiC
0	2.52335	-0.883782	fhuA	82.181	86.107	220920000	49	21.6608	21.6882	21.5086	20.7307	20.955	20.5206	P06971	Ferrichrome-iron receptor
0	2.22652	-0.898265	yciK	27.933	19.285	38931000	11	19.6929	19.3917	19.8341	18.8141	18.8778	18.5319	P31808	Uncharacterized oxidoreductase YciK
0	1.07521	-0.899909	yajC	11.887	26.314	221980000	13	22.7912	NaN	23.4772	21.9211	22.5736	22.2082	P0ADZ7	UPF0092 membrane protein YajC
0	2.19452	-0.92426	nfuA	20.997	53.505	167090000	22	21.8874	21.8867	21.5148	21.0846	20.669	20.7626	P63020	Fe/S biogenesis protein NfuA
0	3.3207	-0.926842	malE	43.387	180.9	357000000	73	21.8175	21.8385	21.8052	21.0661	20.8407	20.774	P0AEX9	Maltose-binding periplasmic protein
0	2.14819	-0.934203	fmt	34.168	69.575	48215000	16	19.4453	NaN	19.7078	18.4837	18.7144	18.729	P23882	Methionyl-tRNA formyltransferase
0	2.15346	-0.93601	atpF	17.264	61.697	538550000	49	23.4862	22.9243	23.4268	22.433	22.3037	22.2924	P0ABA0	ATP synthase subunit b
0	2.08256	-0.93685	rlmM	41.905	24.926	60968000	17	20.4962	20.3951	20.1922	19.4252	19.7196	19.1282	P0ADR6	Ribosomal RNA large subunit methyltransferase M
0	2.5927	-0.93771	iscU	13.848	32.913	184820000	27	22.082	22.399	22.1789	21.101	21.459	21.2866	P0ACD4	Iron-sulfur cluster assembly scaffold protein IscU
0	2.29924	-0.940025	ybeZ	39.038	59.282	233770000	33	22.1125	21.9358	22.4454	21.1678	21.1287	21.3771	P0A9K3	PhoH-like protein
0	2.47545	-0.941327	aceA	47.521	323.31	1256200000	130	23.5564	23.4735	23.1827	22.4993	22.6137	22.2755	P0A9G6	Isocitrate lyase
0	1.93648	-0.947536	cyoB	74.367	60.096	187640000	43	21.5168	21.8852	22.0924	20.6876	20.8259	21.1383	P0ABI8	Cytochrome bo(3) ubiquinol oxidase subunit 1
0	1.1922	-0.952062	pal	18.824	34.793	129830000	22	21.3398	20.8773	21.892	20.3857	20.0288	20.8384	P0A912	Peptidoglycan-associated lipoprotein
0	2.86229	-0.963959	pdxY	31.322	16.417	37157000	9	20.2282	20.086	20.0021	19.3375	18.9934	19.0935	P77150	Pyridoxamine kinase
0	4.67032	-0.97179	hns	15.539	139.17	612480000	44	24.0723	24.0223	24.0772	23.1565	23.0759	23.024	P0ACF8	DNA-binding protein H-NS
0	1.97723	-0.97283	lamB	49.912	176.5	336860000	55	22.9508	23.161	23.2379	21.8585	22.052	22.5208	P02943	Maltoporin
0	1.94982	-0.986881	ygaU	16.063	13.375	53234000	10	21.8137	22.2015	21.5372	21.0777	20.7155	20.7986	P0ADE6	Uncharacterized protein YgaU
0	2.74102	-0.996833	rbsB	30.95	323.31	1931600000	146	24.1013	23.8494	23.8159	23.1258	22.8019	22.8483	P02925	D-ribose-binding periplasmic protein
0	1.25299	-1.0022	gadC	55.076	9.6631	54919000	12	20.6244	21.204	20.4249	19.1751	19.9255	20.1462	P63235	Probable glutamate/gamma-aminobutyrate antiporter
0	0.491875	-1.02625	pyrD	36.774	22.725	31126000	10	20.1842	19.4745	NaN	19.5057	NaN	18.1005	P0A7E1	Dihydroorotate dehydrogenase (quinone)
0	0.626942	-1.03274	ansA	37.127	10.053	16436000	9	19.2332	NaN	19.8686	17.5076	18.9111	19.1359	P0A962	L-asparaginase 1
0	1.24754	-1.03491	yqgE	20.686	153.13	608990000	72	23.3872	23.3038	22.2495	22.0901	22.0656	21.6801	P0A8W5	UPF0301 protein YqgE
0	0.92666	-1.04463	phnA	12.345	20.636	14050000	4	NaN	19.8821	20.3137	NaN	18.7219	19.3847	P0AFJ1	Protein PhnA
0	0.945945	-1.07477	glmU	49.19	45.372	82731000	23	20.498	21.4113	22.2913	20.2769	20.5545	20.1449	P0ACC7	Bifunctional protein GlmU;UDP-N-acetylglucosamine pyrophosphorylase;Glucosamine-1-phosphate N-acetyltransferase
0	1.18594	-1.13657	frdB	27.123	37.56	129030000	22	21.0775	22.0735	21.6001	19.8255	21.0243	20.4916	P0AC47	Fumarate reductase iron-sulfur subunit
0	1.28094	-1.16571	rplC	22.243	106.65	1792700000	91	25.2302	23.928	24.9123	23.8095	23.2253	23.5385	P60438	50S ribosomal protein L3
0	0.527169	-1.31598	rpsT	9.6843	44.916	357770000	20	23.8783	21.8287	23.1579	23.448	20.4436	21.0253	P0A7U7	30S ribosomal protein S20
0	0.80958	-1.33936	ybjP	18.991	9.9865	18654000	8	20.1182	NaN	19.426	NaN	18.9221	17.9433	P75818	Uncharacterized lipoprotein YbjP
0	0.627728	-1.36085	aphA	26.103	8.0875	9307800	5	NaN	19.0812	19.4551	NaN	17.1174	18.6972	P0AE22	Class B acid phosphatase
0	1.04397	-1.36316	rplV	12.226	143.9	1517300000	101	25.5151	23.9018	24.9673	24.137	22.7918	23.3659	P61175	50S ribosomal protein L22
0	0.815231	-1.38827	rpmE	7.871	37.431	332810000	31	24.2442	22.5159	24.3346	22.944	21.2772	22.7086	P0A7M9	50S ribosomal protein L31
0	1.11877	-1.5007	rpsN	11.58	46.924	316020000	20	23.8957	22.8536	24.1671	22.4387	21.8375	NaN	P0AG59	30S ribosomal protein S14
0	0.781641	-1.87068	rpsU	8.4999	15.39	162070000	19	23.42	NaN	23.0036	22.1887	NaN	20.4935	P68679	30S ribosomal protein S21
0	0.495495	-1.95235	yggE	26.635	209.9	1066100000	92	24.9044	20.8259	24.7396	22.7286	19.3696	22.5147	P0ADS6	Uncharacterized protein YggE
0	1.1392	-2.04126	focA	30.99	41.122	144300000	15	21.012	23.6257	22.9343	20.2964	21.0956	20.0562	P0AC23	Probable formate transporter 1
0	1.1402	-2.12707	rpmH	5.3803	6.792	1619000000	32	27.3867	26.4586	25.4948	25.6919	23.6777	23.5894	P0A7P5	50S ribosomal protein L34
0	0.985094	-2.21932	can	25.096	98.404	2147000000	114	26.753	24.4468	26.7889	24.7029	22.3641	24.2637	P61517	Carbonic anhydrase 2
-1	2.02609	-1.01255	rplK	14.875	66.967	2246600000	99	26.0636	25.6607	25.924	25.099	24.9989	24.5128	P0A7J7	50S ribosomal protein L11
-1	2.64951	-1.02796	mglB	35.712	89.308	343820000	54	22.5886	22.5019	22.5335	21.6538	21.6639	21.2223	P0AEE5	D-galactose-binding periplasmic protein
-1	1.81892	-1.02832	luxS	19.416	39.098	111010000	19	21.7863	21.1831	21.4316	20.5994	20.0757	20.6409	P45578	S-ribosylhomocysteine lyase
-1	1.88136	-1.03804	moaB	18.665	22.6	69785000	18	20.101	20.0587	20.6712	19.0109	19.2017	19.5041	P0AEZ9	Molybdenum cofactor biosynthesis protein B
-1	1.84621	-1.04354	rpiA	22.86	22.151	50354000	15	20.6127	20.3028	NaN	19.5286	19.5578	19.1563	P0A7Z0	Ribose-5-phosphate isomerase A
-1	1.62052	-1.04435	yeiP	21.532	13.378	37223000	9	20.2555	NaN	20.0139	18.9785	NaN	19.2022	P0A6N8	Elongation factor P-like protein
-1	3.61705	-1.05198	ptsG	50.676	145.91	715710000	89	22.8477	22.7121	22.8268	21.645	21.6984	21.8872	P69786	PTS system glucose-specific EIICB component;Glucose permease IIC component;Glucose-specific phosphotransferase enzyme IIB component
-1	2.72517	-1.07318	rplL	12.295	33.875	1729100000	76	25.1008	25.1814	24.8699	24.2045	23.8478	23.8804	P0A7K2	50S ribosomal protein L7/L12
-1	3.16567	-1.07329	nuoI	20.538	25.199	75734000	18	20.6788	20.6348	20.6558	19.5574	19.4031	19.7891	P0AFD6	NADH-quinone oxidoreductase subunit I
-1	3.08736	-1.08207	sspA	24.305	120.34	135750000	37	20.8425	20.5047	20.7052	19.7342	19.5092	19.5628	P0ACA3	Stringent starvation protein A
-1	2.62378	-1.08446	treB	51.08	124.84	631640000	64	23.0574	23.1877	22.7402	21.78	22.0731	21.8788	P36672	PTS system trehalose-specific EIIBC component;Trehalose-specific phosphotransferase enzyme IIB component;Trehalose permease IIC component
-1	1.96544	-1.0916	iadA	41.083	27.483	70422000	10	21.2957	20.9312	NaN	20.1523	19.8132	20.1001	P39377	Isoaspartyl dipeptidase
-1	3.33801	-1.1133	ygfZ	36.094	59.976	170640000	44	21.4234	21.273	21.5832	20.2099	20.4028	20.327	P0ADE8	tRNA-modifying protein YgfZ
-1	2.52168	-1.11791	proP	54.845	42.553	56488000	19	20.0124	19.9002	19.5997	18.5129	18.9374	18.7082	P0C0L7	Proline/betaine transporter
-1	3.70937	-1.12355	katG	80.023	300.85	433740000	92	21.8361	21.8391	21.6917	20.753	20.7173	20.5258	P13029	Catalase-peroxidase
-1	2.31137	-1.12811	prfC	59.573	151.64	286370000	64	22.0665	21.6089	22.1111	20.8713	20.9635	20.5674	P0A7I4	Peptide chain release factor 3
-1	2.23948	-1.12841	yeeN	25.867	20.422	35128000	14	19.9103	19.8591	20.1922	18.9744	NaN	18.7432	P0A8A2	Probable transcriptional regulatory protein YeeN
-1	2.6191	-1.14614	rpsI	14.856	38.954	2081500000	129	24.9366	24.7831	25.003	23.7356	24.0413	23.5074	P0A7X3	30S ribosomal protein S9
-1	2.91928	-1.15846	btuB	68.406	60.599	51075000	21	19.9274	19.8809	20.308	18.8272	18.9603	18.8534	P06129	Vitamin B12 transporter BtuB
-1	2.62924	-1.15973	eda	22.284	195.42	504340000	60	23.0396	22.4804	22.8072	21.6227	21.6931	21.5323	P0A955	KHG/KDPG aldolase;4-hydroxy-2-oxoglutarate aldolase;2-dehydro-3-deoxy-phosphogluconate aldolase
-1	2.09204	-1.16067	mioC	15.807	14.789	21156000	8	19.9703	NaN	19.5007	18.6609	18.5536	18.51	P03817	Protein MioC
-1	2.33447	-1.17177	nupC	43.475	38.26	86007000	21	20.9712	20.3553	20.9232	19.4905	19.5684	19.6756	P0AFF2	Nucleoside permease NupC
-1	2.03735	-1.17305	malF	57.013	13.551	25208000	7	19.5336	NaN	19.5802	18.3377	18.1497	18.6641	P02916	Maltose transport system permease protein MalF
-1	3.51195	-1.17311	acpP	8.6394	87.29	702350000	25	24.3826	24.5285	24.6146	23.2628	23.4839	23.2597	P0A6A8	Acyl carrier protein
-1	2.12432	-1.17745	rplD	22.086	223.03	2105200000	98	25.559	25.3289	24.9654	24.3811	24.1139	23.826	P60723	50S ribosomal protein L4
-1	1.50425	-1.17901	frsA	47.008	44.312	45644000	24	20.4029	NaN	19.8764	19.1543	19.134	18.5937	P04335	Esterase FrsA
-1	3.34796	-1.17911	grxD	12.879	48.884	147610000	19	21.912	21.7118	22.0864	20.6813	20.7707	20.7208	P0AC69	Glutaredoxin-4
-1	2.65898	-1.18225	yfbU	19.536	28.843	96876000	19	NaN	21.4894	21.6653	20.548	20.2984	20.339	P0A8W8	UPF0304 protein YfbU
-1	2.00193	-1.19633	ttcA	35.561	101.8	246530000	45	22.2422	22.4034	21.5727	20.959	20.889	20.7814	P76055	tRNA 2-thiocytidine biosynthesis protein TtcA
-1	3.05097	-1.19685	mqo	60.229	42.035	88868000	22	20.4626	20.243	20.4526	19.0988	19.0528	19.4161	P33940	Malate:quinone oxidoreductase
-1	4.45956	-1.20303	gshA	58.269	49.254	86871000	29	20.4226	20.4907	20.4268	19.1835	19.3534	19.194	P0A6W9	Glutamate--cysteine ligase
-1	1.6553	-1.22925	apt	19.859	17.142	34403000	12	20.4589	20.2918	20.4333	19.5316	18.7992	NaN	P69503	Adenine phosphoribosyltransferase
-1	2.43637	-1.23915	dapA	31.27	35.56	101810000	20	20.778	21.2229	20.6233	19.6203	19.8071	19.4794	P0A6L2	4-hydroxy-tetrahydrodipicolinate synthase
-1	2.76175	-1.24577	mdoH	96.936	47.345	52010000	27	20.4362	20.5859	20.233	19.4263	19.1103	18.9813	P62517	Glucans biosynthesis glucosyltransferase H
-1	3.72177	-1.25223	frr	20.638	185.19	572160000	57	23.3244	23.5565	23.4352	22.2106	22.0602	22.2887	P0A805	Ribosome-recycling factor
-1	1.96026	-1.28028	rplP	15.281	93.809	1843800000	88	25.7373	25.0313	25.9382	24.3998	24.141	24.3251	P0ADY7	50S ribosomal protein L16
-1	3.69427	-1.28118	ycfH	29.808	25.885	42561000	14	20.0591	20.1042	20.2858	18.7439	18.8752	18.9864	P0AFQ7	Uncharacterized deoxyribonuclease YcfH
-1	3.02418	-1.28815	yaeH	15.096	21.628	89268000	23	21.0682	21.0391	20.9184	19.9937	19.6376	19.5299	P62768	UPF0325 protein YaeH
-1	2.07096	-1.3003	rpsD	23.469	184.68	3950300000	125	26.0214	25.2319	25.4128	24.4826	24.2307	24.0519	P0A7V8	30S ribosomal protein S4
-1	2.93358	-1.30261	damX	46.161	27.413	84806000	25	20.7078	20.5545	20.7795	19.5321	19.5092	19.0927	P11557	Cell division protein DamX
-1	1.5575	-1.31417	secG	11.365	28.347	98435000	8	NaN	21.5281	22.284	20.4927	20.4355	20.8475	P0AG99	Protein-export membrane protein SecG
-1	2.79606	-1.32273	trxA	11.806	24.047	85265000	22	21.159	20.9013	20.9309	19.9798	19.4943	19.549	P0AA25	Thioredoxin-1
-1	3.03268	-1.32762	rplB	29.86	295.91	8231600000	369	26.2754	26.4043	26.7689	25.2115	25.1008	25.1534	P60422	50S ribosomal protein L2
-1	3.05083	-1.33234	speB	33.557	48.992	117340000	21	21.6226	21.212	21.6215	20.2771	20.0884	20.0936	P60651	Agmatinase
-1	2.63819	-1.33611	lpp	8.3234	135.99	4080700000	159	27.4455	26.9745	27.5997	25.9916	25.9327	26.0871	P69776	Major outer membrane lipoprotein Lpp
-1	4.06464	-1.34414	rplO	14.98	88.347	2635800000	116	25.9393	25.8289	25.817	24.5922	24.5903	24.3704	P02413	50S ribosomal protein L15
-1	1.87028	-1.34969	panB	28.237	22.64	63822000	6	20.4124	21.4396	21.0674	19.8393	19.5544	19.4766	P31057	3-methyl-2-oxobutanoate hydroxymethyltransferase
-1	3.74436	-1.37573	smpB	18.269	12.497	56834000	10	20.8763	20.8725	20.9893	19.648	19.6158	19.3471	P0A832	SsrA-binding protein
-1	1.80734	-1.38317	talA	35.658	19.358	38541000	14	19.2562	NaN	19.3558	18.2101	17.506	18.0523	P0A867	Transaldolase A
-1	2.56394	-1.39905	yjiY	77.323	92.586	702060000	49	23.4069	23.9027	23.9041	22.0988	22.362	22.5558	P39396	Inner membrane protein YjiY
-1	2.18811	-1.42607	yfaY	44.225	28.137	24184000	12	19.4932	19.5389	NaN	17.8015	18.3609	18.1076	P77808	NMN amidohydrolase-like protein YfaY
-1	2.21612	-1.42749	slyB	15.601	108.33	441560000	39	22.9975	22.9842	23.7804	21.8184	21.7326	21.9287	P0A905	Outer membrane lipoprotein SlyB
-1	3.9216	-1.4367	potD	38.867	41.784	168560000	29	21.6087	21.4037	21.6642	20.2333	20.0693	20.0639	P0AFK9	Spermidine/putrescine-binding periplasmic protein
-1	2.48148	-1.43671	yncE	38.612	52.31	48628000	13	20.1841	NaN	20.5849	19.0345	18.8382	18.9707	P76116	Uncharacterized protein YncE
-1	2.46111	-1.44889	rplS	13.133	128.28	2147700000	105	25.7867	25.5725	26.1879	24.3681	24.6729	24.1595	P0A7K6	50S ribosomal protein L19
-1	3.23496	-1.46231	napA	93.041	146.52	236330000	55	22.6252	22.8341	22.3465	21.1771	21.1874	21.0544	P33937	Periplasmic nitrate reductase
-1	2.60232	-1.47665	yajG	20.95	117.04	197900000	23	22.9642	22.5913	22.4079	21.3978	20.905	21.2307	P0ADA5	Uncharacterized lipoprotein YajG
-1	2.87218	-1.47965	rplQ	14.364	36.967	2178900000	118	25.7676	25.25	25.6926	24.1629	24.1998	23.9086	P0AG44	50S ribosomal protein L17
-1	3.75369	-1.49042	fbaB	38.109	44.889	25564000	17	19.5026	19.6467	19.5103	18.0925	18.033	NaN	P0A991	Fructose-bisphosphate aldolase class 1
-1	2.40014	-1.50899	rpsL	13.737	20.216	1674000000	37	25.4538	25.9594	25.424	24.3827	24.1717	23.7557	P0A7S3	30S ribosomal protein S12
-1	1.63397	-1.51515	hfq	11.166	53.232	74563000	14	21.4555	20.8608	22.125	20.2193	20.1381	19.5385	P0A6X3	RNA-binding protein Hfq
-1	2.37576	-1.52846	rpmB	9.0064	19.213	789140000	39	25.0522	24.722	24.9099	23.746	23.4368	22.9158	P0A7M2	50S ribosomal protein L28
-1	2.38381	-1.53079	rplY	10.693	44.779	405380000	53	23.9515	23.2288	23.5355	22.3476	21.8836	21.8923	P68919	50S ribosomal protein L25
-1	2.22272	-1.54647	rpsR	8.9863	40.278	734830000	45	24.7676	24.7591	25.2527	23.8242	22.9989	23.317	P0A7T7	30S ribosomal protein S18
-1	1.71875	-1.5493	rpsP	9.1904	26.821	675480000	42	24.9771	23.9312	25.1117	23.3907	23.1575	22.8239	P0A7T3	30S ribosomal protein S16
-1	3.23092	-1.55158	cydA	58.204	57.142	404770000	59	22.6722	23.1238	22.9577	21.3224	21.5306	21.2459	P0ABJ9	Cytochrome bd-I ubiquinol oxidase subunit 1
-1	2.88663	-1.55372	nuoH	36.219	13.501	26992000	11	20.0658	20.341	20.073	18.526	NaN	18.6864	P0AFD4	NADH-quinone oxidoreductase subunit H
-1	3.61808	-1.59972	agp	45.682	24.895	57992000	14	20.0188	20.0605	20.1656	18.5025	18.2627	18.6805	P19926	Glucose-1-phosphatase
-1	1.79788	-1.60609	insH11	37.851	41.604	151560000	22	21.4414	21.9635	22.6709	20.3794	20.7521	20.126	A0A385XJE6	Transposase InsH for insertion sequence element IS5T;Transposase InsH for insertion sequence element IS5R;Transposase InsH for insertion sequence element IS5LO;Transposase InsH for insertion sequence element IS5K;Transposase InsH for insertion sequence element IS5I;Transposase InsH for insertion sequence element IS5H;Transposase InsH for insertion sequence element IS5F;Transposase InsH for insert…
-1	1.69418	-1.6515	rplR	12.769	82.024	1508000000	36	26.5682	25.4251	25.9354	24.9117	24.0114	24.0511	P0C018	50S ribosomal protein L18
-1	3.29408	-1.68749	gor	48.772	100.2	145220000	51	21.1139	20.7146	20.6608	19.2554	19.1869	18.9847	P06715	Glutathione reductase
-1	3.62626	-1.69157	ycaR	6.8549	5.4802	19196000	8	19.7127	19.6598	NaN	17.8751	18.0708	18.0382	P0AAZ7	UPF0434 protein YcaR
-1	1.79503	-1.70676	mreC	39.53	35.617	106990000	20	22.3839	21.7626	22.2397	21.0552	19.7343	20.4764	P16926	Cell shape-determining protein MreC
-1	1.81283	-1.71907	rob	33.144	20.367	49676000	17	20.4592	20.9623	19.6566	18.3032	18.9494	18.6683	P0ACI0	Right origin-binding protein
-1	2.72922	-1.73871	eco	18.192	15.946	33508000	10	19.9706	20.2887	20.7768	18.665	18.5288	18.6263	P23827	Ecotin
-1	3.54345	-1.77144	ycjX	52.609	7.0968	12170000	6	19.6755	19.6974	NaN	17.8871	17.9429	NaN	P76046	Uncharacterized protein YcjX
-1	2.88698	-1.80752	ybaY	19.431	58.688	30873000	11	20.6734	20.1876	20.5705	18.4879	18.5132	19.0079	P77717	Uncharacterized lipoprotein YbaY
-1	3.16516	-1.81098	map	29.33	102.77	952340000	78	25.211	24.7968	24.9727	23.3831	23.2707	22.8938	P0AE18	Methionine aminopeptidase
-1	2.05722	-1.81101	deoC	27.733	135.22	412230000	48	23.6287	24.1077	23.1377	22.0168	22.1173	21.307	P0A6L0	Deoxyribose-phosphate aldolase
-1	3.16406	-1.81713	rplU	11.564	11.174	703770000	43	25.1973	24.7755	25.0135	23.3657	23.2814	22.8879	P0AG48	50S ribosomal protein L21
-1	3.02323	-1.82286	rpmD	6.5417	12.459	297770000	18	23.9831	24.1145	24.3111	22.6745	22.2084	22.0572	P0AG51	50S ribosomal protein L30
-1	2.44095	-1.83378	rbsD	15.292	34.452	163650000	19	22.7355	23.0266	22.9222	21.6346	20.7374	20.811	P04982	D-ribose pyranase
-1	1.31564	-1.83682	rpmI	7.2888	13.699	1501400000	9	27.206	NaN	26.9343	NaN	25.6299	24.8367	P0A7Q1	50S ribosomal protein L35
-1	2.35962	-1.85519	yigI	17.163	31.093	161940000	32	22.2919	21.9219	22.1638	20.8123	19.7749	20.2249	P0ADP2	Uncharacterized protein YigI
-1	3.10331	-1.86172	phoP	25.535	14.481	41814000	13	20.3646	20.407	20.9606	18.799	18.584	18.7641	P23836	Transcriptional regulatory protein PhoP
-1	2.16425	-1.86906	rpsO	10.269	91.806	1068700000	32	25.7443	25.3549	24.7834	23.8352	23.4174	23.0228	P0ADZ4	30S ribosomal protein S15
-1	3.09422	-1.87452	glgB	84.336	84.204	111160000	25	21.781	21.3097	21.9511	19.9232	19.6681	19.8269	P07762	1,4-alpha-glucan branching enzyme GlgB
-1	4.21799	-1.87498	slp	20.964	44.342	66016000	17	21.3491	21.5854	21.322	19.5409	19.6587	19.4319	P37194	Outer membrane protein slp
-1	2.82154	-1.88957	ybgI	26.892	47.285	38585000	13	NaN	20.4246	20.5774	18.3771	18.6668	18.7904	P0AFP6	Putative GTP cyclohydrolase 1 type 2
-1	6.17423	-1.89116	cdd	31.54	241.39	298860000	41	22.2109	22.1042	22.1824	20.297	20.2763	20.2507	P0ABF6	Cytidine deaminase
-1	1.46297	-1.89435	artI	26.929	13.472	19935000	7	19.9433	20.7159	19.3479	18.0527	18.1634	NaN	P30859	Putative ABC transporter arginine-binding protein 2
-1	1.81944	-1.91244	ycbB	67.812	6.5093	17902000	8	19.9745	NaN	20.7012	18.5276	18.0271	18.7214	P22525	Probable L,D-transpeptidase YcbB
-1	1.98715	-1.91625	mug	18.673	9.6042	36238000	12	20.9699	19.8938	21.1607	18.584	18.6478	19.0439	P0A9H1	G/U mismatch-specific DNA glycosylase
-1	3.39652	-1.94069	rplT	13.497	21.334	3751400000	131	26.9032	26.6832	26.8704	25.1635	24.5946	24.8767	P0A7L3	50S ribosomal protein L20
-1	3.01747	-1.97507	lrp	18.887	70.495	258530000	43	22.8065	22.6279	23.2584	21.1565	20.8945	20.7166	P0ACJ0	Leucine-responsive regulatory protein
-1	2.22741	-2.01	lexA	22.357	49.99	54017000	21	20.8611	21.1472	20.5017	18.8398	19.3861	18.2543	P0A7C2	LexA repressor
-1	2.43954	-2.02291	pspA	25.493	43.12	107210000	31	21.9075	21.0477	22.0513	19.8465	19.4804	19.6108	P0AFM6	Phage shock protein A
-1	4.28712	-2.05264	cspA	7.4032	38.157	194030000	15	22.3429	22.5484	22.446	20.5711	20.3601	20.2482	P0A9X9	Cold shock protein CspA
-1	1.30223	-2.05583	csdE	15.94	108.36	150810000	19	23.2051	21.2312	23.1328	21.1014	19.8552	20.4451	P0AGF2	Sulfur acceptor protein CsdE
-1	5.8563	-2.07687	proX	36.022	152.69	133030000	34	21.7675	21.6691	21.6204	19.6378	19.5952	19.5933	P0AFM2	Glycine betaine-binding periplasmic protein
-1	1.41411	-2.09189	mazF	12.098	6.8368	28332000	6	21.3044	NaN	20.8922	18.637	NaN	19.3758	P0AE70	mRNA interferase MazF
-1	5.37652	-2.11622	fldA	19.737	51.946	83686000	16	21.5907	21.6427	21.6114	19.6149	19.4191	19.4621	P61949	Flavodoxin-1
-1	2.86271	-2.11902	hupB	9.2255	35.188	348220000	26	23.5339	23.9312	23.5327	22.011	21.3029	21.3268	P0ACF4	DNA-binding protein HU-beta
-1	2.0731	-2.16675	yiiM	25.342	24.622	37586000	13	21.4101	21.3205	20.1452	18.8818	19.0616	18.4322	P32157	Protein YiiM
-1	2.06473	-2.17843	yhbY	10.784	5.0933	75928000	14	21.6087	21.4417	21.7312	19.8672	NaN	18.9637	P0AGK4	RNA-binding protein YhbY
-1	3.99449	-2.18039	sodA	23.097	94.344	729910000	68	24.3773	24.0685	24.4826	22.0428	22.0856	22.2589	P00448	Superoxide dismutase [Mn]
-1	3.10388	-2.23067	ompX	18.602	97.138	416640000	40	23.6079	23.3692	23.8527	21.7451	21.0587	21.3341	P0A917	Outer membrane protein X
-1	1.83591	-2.23542	rpsS	10.43	67.376	1065800000	55	25.3253	25.321	26.5802	23.9587	23.7308	22.8308	P0A7U3	30S ribosomal protein S19
-1	3.72425	-2.24033	hupA	9.5349	93.842	972900000	53	24.7851	24.8001	25.2641	22.8243	22.6072	22.6967	P0ACF0	DNA-binding protein HU-alpha
-1	1.86541	-2.32611	dps	18.695	127.28	871860000	82	24.3459	23.032	24.2599	21.9916	20.8509	21.8169	P0ABT2	DNA protection during starvation protein
-1	5.39753	-2.35297	dhaK	38.215	219.47	494650000	76	22.7694	22.8007	22.827	20.522	20.5	20.3162	P76015	PTS-dependent dihydroxyacetone kinase, dihydroxyacetone-binding subunit DhaK
-1	1.73206	-2.39556	folX	14.082	53.158	166170000	18	22.9072	NaN	22.6792	21.0092	19.6676	20.5162	P0AC19	D-erythro-7,8-dihydroneopterin triphosphate epimerase
-1	4.34478	-2.4083	birA	35.312	52.484	89697000	33	21.2978	21.0207	21.3622	18.7478	18.9613	18.7466	P06709	Bifunctional ligase/repressor BirA
-1	3.19304	-2.45702	mdh	32.337	323.31	5982700000	214	26.9932	26.8265	26.2719	24.4145	24.3217	23.9843	P61889	Malate dehydrogenase
-1	2.88222	-2.47955	rplX	11.316	140.2	958540000	68	24.9503	24.8653	25.6331	23.0335	22.5907	22.3857	P60624	50S ribosomal protein L24
-1	3.92653	-2.57213	cspE	7.4634	45.179	467050000	36	24.3011	24.2526	24.0623	21.9379	21.5434	21.4182	P0A972	Cold shock-like protein CspE
-1	3.9318	-2.58757	nusG	20.531	277.52	5273000000	265	28.4706	27.9699	28.3103	25.7965	25.7018	25.4898	P0AFG0	Transcription termination/antitermination protein NusG
-1	3.55288	-2.60548	evgA	22.69	91.449	344910000	62	24.1356	23.6123	24.2912	21.5294	21.2778	21.4156	P0ACZ4	Positive transcription regulator EvgA
-1	3.93953	-2.61218	accB	16.687	323.31	174110000000	1404	33.2406	33.1257	32.8944	30.7538	30.3729	30.2976	P0ABD8	Biotin carboxyl carrier protein of acetyl-CoA carboxylase
-1	2.63225	-2.6158	plsX	38.214	74.203	701490000	27	24.5467	24.6784	23.8522	21.8417	22.1724	21.2159	P27247	Phosphate acyltransferase
-1	2.07801	-2.67607	pdxJ	26.384	57.46	88239000	31	21.8046	21.955	20.953	19.7098	18.8398	18.1348	P0A794	Pyridoxine 5-phosphate synthase
-1	5.39457	-2.75035	dppA	60.293	91.176	389630000	62	23.0685	23.11	23.108	20.4724	20.2043	20.3587	P23847	Periplasmic dipeptide transport protein
-1	3.1175	-2.75769	def	19.328	130.86	720810000	71	23.9237	24.8039	24.4626	21.4834	21.9453	21.4884	P0A6K3	Peptide deformylase
-1	1.57943	-2.81741	elbB	22.981	323.31	4205300000	166	26.8969	27.0921	25.5338	24.2676	24.4231	22.3799	P0ABU5	Enhancing lycopene biosynthesis protein 2
-1	2.04169	-2.83354	aspC	43.573	323.31	4789400000	255	25.9792	25.7016	24.8018	23.1953	23.0877	21.699	P00509	Aspartate aminotransferase
-1	1.84038	-2.98787	rpmF	6.4463	184.09	541930000	44	24.2279	25.8384	24.2831	22.7671	21.1594	21.4592	P0A7N4	50S ribosomal protein L32
-1	2.65221	-2.99694	ridA	13.611	88.726	1101900000	39	25.605	26.2057	25.3471	22.4907	23.4041	22.2722	P0AF93	2-iminobutanoate/2-iminopropanoate deaminase
-1	3.02208	-3.0948	cspC	7.4023	59.374	130500000	30	22.2957	22.5014	22.339	19.573	19.6898	18.5889	P0A9Y6	Cold shock-like protein CspC
-1	4.57862	-3.2902	nadE	30.636	89.256	183730000	50	21.9655	22.215	22.4614	18.845	19.0127	18.9137	P18843	NH(3)-dependent NAD(+) synthetase
-1	2.02944	-1.02697	gpmA	28.556	85.874	450400000	55	23.4034	22.8639	23.2751	22.2515	21.8664	22.3436	P62707	2,3-bisphosphoglycerate-dependent phosphoglycerate mutase
-1	1.35806	-1.05573	katE	84.162	17.482	17550000	7	18.3088	NaN	18.3204	16.8408	17.6846	17.2512	P21179	Catalase HPII
-1	3.56675	-1.17645	fbaA	39.147	323.31	1737600000	96	24.4075	24.4846	24.3117	23.3745	23.2152	23.0848	P0AB71	Fructose-bisphosphate aldolase class 2
-1	2.97962	-1.23997	rpsK	13.845	78.988	2310600000	84	25.6854	25.3988	25.3876	24.2026	24.4578	24.0914	P0A7R9	30S ribosomal protein S11
-1	2.62173	-1.25635	srlB	13.304	27.657	82514000	16	20.8104	21.2158	20.8088	19.5072	19.926	19.6329	P05706	Glucitol/sorbitol-specific phosphotransferase enzyme IIA component
-1	1.78363	-1.25739	atpG	31.577	247.06	1170200000	105	24.2463	23.716	23.2106	22.6606	22.431	22.3091	P0ABA6	ATP synthase gamma chain
-1	3.61051	-1.26839	oppA	60.898	155.74	492650000	105	22.1584	22.2374	22.4862	20.9809	21.0205	21.0755	P23843	Periplasmic oligopeptide-binding protein
-1	3.4755	-1.334	rplF	18.904	185.73	4839600000	158	26.1291	25.8188	25.9522	24.571	24.781	24.546	P0AG55	50S ribosomal protein L6
-1	3.01583	-1.35035	rplM	16.018	108.09	1816100000	93	25.8312	25.4349	25.6594	24.3668	24.4232	24.0846	P0AA10	50S ribosomal protein L13
-1	2.84344	-1.49074	glpQ	40.843	159.07	321490000	68	21.5731	22.07	21.5199	20.2518	20.347	20.0921	P09394	Glycerophosphoryl diester phosphodiesterase
-1	2.00817	-1.60805	deoB	44.369	323.31	2264700000	189	24.7314	24.8203	23.94	22.9798	23.1917	22.496	P0A6K6	Phosphopentomutase
-1	3.77364	-1.61897	pgl	36.307	32.799	41931000	11	20.3843	20.5945	20.3163	18.8664	18.6473	18.9244	P52697	6-phosphogluconolactonase
-1	5.0158	-1.64819	ppa	19.703	38.779	721390000	46	23.6134	23.5485	23.6455	22.0257	21.9826	21.8545	P0A7A9	Inorganic pyrophosphatase
-1	1.47985	-1.64845	rpmA	9.1244	32.221	337180000	38	24.2509	23.3174	23.9779	23.063	21.6637	21.8741	P0A7L8	50S ribosomal protein L27
-1	1.58938	-1.70215	ptsH	9.1193	66.043	324740000	44	24.5998	23.2146	24.6228	22.7428	22.2096	22.3784	P0AA04	Phosphocarrier protein HPr
-1	2.05592	-1.70924	ahpC	20.761	130.21	646930000	62	23.4349	24.3964	23.366	22.2694	21.9821	21.818	P0AE08	Alkyl hydroperoxide reductase subunit C
-1	3.01149	-1.73529	rpsM	13.099	186.04	4754300000	175	26.6477	26.2565	26.1498	24.8403	24.6211	24.3867	P0A7S9	30S ribosomal protein S13
-1	3.19946	-1.95193	gmhA	20.815	106.35	192640000	26	23.053	22.8821	22.4474	20.6757	20.9815	20.8696	P63224	Phosphoheptose isomerase
-1	2.42224	-2.0299	sodB	21.265	71.153	277680000	39	23.2456	22.7551	22.3149	21.0147	20.8624	20.3487	P0AGD3	Superoxide dismutase [Fe]
-1	4.05059	-2.43248	yajQ	18.344	323.31	2201800000	121	26.0272	25.5828	25.9224	23.5234	23.2788	23.4328	P0A8E7	UPF0234 protein YajQ

## Sheet: Experimental Summary
Raw file	Experiment	Enzyme	Enzyme mode	Enzyme first search	Enzyme mode first search	Use enzyme first search	Variable modifications	Fixed modifications	Multi modifications	Variable modifications first search	Use variable modifications first search	Requantify	Multiplicity	Max. missed cleavages	Labels0	LC-MS run type	Time-dependent recalibration	MS	MS/MS	MS3	MS/MS submitted	MS/MS submitted (SIL)	MS/MS submitted (ISO)	MS/MS submitted (PEAK)	MS/MS identified	MS/MS identified (SIL)	MS/MS identified (ISO)	MS/MS identified (PEAK)	MS/MS identified [%]	MS/MS identified (SIL) [%]	MS/MS identified (ISO) [%]	MS/MS identified (PEAK) [%]	Peptide sequences identified	Peaks	Peaks sequenced	Peaks sequenced [%]	Peaks repeatedly sequenced	Peaks repeatedly sequenced [%]	Isotope patterns	Isotope patterns sequenced	Isotope patterns sequenced (z>1)	Isotope patterns sequenced [%]	Isotope patterns sequenced (z>1) [%]	Isotope patterns repeatedly sequenced	Isotope patterns repeatedly sequenced [%]	Recalibrated	Av. absolute mass deviation [ppm]	Mass standard deviation [ppm]	Av. absolute mass deviation [mDa]
2_Me-BP_1	Me_1	Trypsin/P;LysC	Specific			FALSE	Oxidation (M);Acetyl (Protein N-term)	Carbamidomethyl (C)			FALSE	FALSE	1	2		Standard		12106	43741	0	51800	35680	0	16120	6517	6250	0	267	13	18	0	1.7	3821	913402	31692	3.5	5548	18	93903	22391	21120	24	28	6695	30	+	0.51115	0.76035	0.34185
9_Me-BP_2	Me_2	Trypsin/P;LysC	Specific			FALSE	Oxidation (M);Acetyl (Protein N-term)	Carbamidomethyl (C)			FALSE	FALSE	1	2		Standard		14276	38173	0	44727	31619	0	13108	7495	7106	0	389	17	22	0	3	4379	958471	27782	2.9	5148	19	92164	20144	19079	22	26	5954	30	+	0.51277	0.7641	0.35393
16_Me-BP_3	Me_3	Trypsin/P;LysC	Specific			FALSE	Oxidation (M);Acetyl (Protein N-term)	Carbamidomethyl (C)			FALSE	FALSE	1	2		Standard		13358	39749	0	46743	32755	0	13988	5338	5119	0	219	11	16	0	1.6	3013	990431	28895	2.9	5158	18	95006	20795	19668	22	26	6160	30	+	0.51835	0.7561	0.35274
5_pPyp-BP_1	pPyp_1	Trypsin/P;LysC	Specific			FALSE	Oxidation (M);Acetyl (Protein N-term)	Carbamidomethyl (C)			FALSE	FALSE	1	2		Standard		8649	52379	0	59372	45386	0	13986	17115	16376	0	739	29	36	0	5.3	8775	840051	39289	4.7	6671	17	109151	30481	29175	28	32	7893	26	+	0.55865	0.83516	0.39273
12_pPyp-BP_2	pPyp_2	Trypsin/P;LysC	Specific			FALSE	Oxidation (M);Acetyl (Protein N-term)	Carbamidomethyl (C)			FALSE	FALSE	1	2		Standard		9921	49435	0	55871	42999	0	12872	18224	17212	0	1012	33	40	0	7.9	9474	862295	37468	4.3	6393	17	109363	29443	28234	27	32	7529	26	+	0.57742	0.85607	0.41275
19_pPyp-BP_3	pPyp_3	Trypsin/P;LysC	Specific			FALSE	Oxidation (M);Acetyl (Protein N-term)	Carbamidomethyl (C)			FALSE	FALSE	1	2		Standard		9253	50314	0	56356	44270	0	12086	16108	15379	0	729	29	35	0	6	8679	840971	38251	4.5	6461	17	108701	30212	28791	28	33	7682	25	+	0.57403	0.85912	0.41404
Total																		67563	273791	0	314869	232709	0	82160	70797	67442	0	3355	22	29	0	4.1	12703	5405621					608288	153466	146067	25	30	41913	27		0.55442	0.82621	0.39064
[truncated: 2 more columns]

## Sheet: Raw data (Maxquant)
Protein IDs	Majority protein IDs	Peptide counts (all)	Peptide counts (razor+unique)	Peptide counts (unique)	Protein names	Gene names	Fasta headers	Number of proteins	Peptides	Razor + unique peptides	Unique peptides	Peptides Me_1	Peptides Me_2	Peptides Me_3	Peptides pPyp_1	Peptides pPyp_2	Peptides pPyp_3	Razor + unique peptides Me_1	Razor + unique peptides Me_2	Razor + unique peptides Me_3	Razor + unique peptides pPyp_1	Razor + unique peptides pPyp_2	Razor + unique peptides pPyp_3	Unique peptides Me_1	Unique peptides Me_2	Unique peptides Me_3	Unique peptides pPyp_1	Unique peptides pPyp_2	Unique peptides pPyp_3	Sequence coverage [%]	Unique + razor sequence coverage [%]	Unique sequence coverage [%]	Mol. weight [kDa]	Sequence length	Sequence lengths	Q-value	Score	Identification type Me_1	Identification type Me_2	Identification type Me_3	Identification type pPyp_1	Identification type pPyp_2	Identification type pPyp_3	Sequence coverage Me_1 [%]	Sequence coverage Me_2 [%]	Sequence coverage Me_3 [%]	Sequence coverage pPyp_1 [%]	Sequence coverage pPyp_2 [%]	Sequence coverage pPyp_3 [%]
A0A385XJE6;P0CE58;P0CE57;P0CE56;P0CE55;P0CE54;P0CE53;P0CE52;P0CE51;P0CE50;P0CE49;P76071	A0A385XJE6;P0CE58;P0CE57;P0CE56;P0CE55;P0CE54;P0CE53;P0CE52;P0CE51;P0CE50;P0CE49;P76071	6;6;6;6;6;6;6;6;6;6;6;4	6;6;6;6;6;6;6;6;6;6;6;4	6;6;6;6;6;6;6;6;6;6;6;4	Transposase InsH for insertion sequence element IS5T;Transposase InsH for insertion sequence element IS5R;Transposase InsH for insertion sequence element IS5LO;Transposase InsH for insertion sequence element IS5K;Transposase InsH for insertion sequence element IS5I;Transposase InsH for insertion sequence element IS5H;Transposase InsH for insertion sequence element IS5F;Transposase InsH for insert…	insH11;insH10;insH9;insH8;insH7;insH6;insH4;insH3;insH2;insH1;insH5	sp|A0A385XJE6|INH21_ECOLI Transposase InsH for insertion sequence element IS5U OS=Escherichia coli (strain K12) OX=83333 GN=insH21 PE=3 SV=2;sp|P0CE58|INH11_ECOLI Transposase InsH for insertion sequence element IS5T OS=Escherichia coli (strain K12) OX=8333	12	6	6	6	3	5	3	4	4	5	3	5	3	4	4	5	3	5	3	4	4	5	21.8	21.8	21.8	37.851	326	326;326;326;326;326;326;326;326;326;326;326;326	0	41.604	By MS/MS	By MS/MS	By MS/MS	By MS/MS	By MS/MS	By MS/MS	10.4	15.6	8.3	12.6	13.5	18.7
A0A7H2C765;P02919	A0A7H2C765;P02919	3;3	3;3	3;3	Penicillin-binding protein 1B;Penicillin-insensitive transglycosylase;Penicillin-sensitive transpeptidase	mrcB	tr|A0A7H2C765|A0A7H2C765_ECOLI Penicillin-binding protein 1B OS=Escherichia coli (strain K12) OX=83333 GN=mrcB PE=3 SV=1;sp|P02919|PBPB_ECOLI Penicillin-binding protein 1B OS=Escherichia coli (strain K12) OX=83333 GN=mrcB PE=1 SV=2	2	3	3	3	0	0	0	0	2	2	0	0	0	0	2	2	0	0	0	0	2	2	5.5	5.5	5.5	88.889	799	799;844	0	18.11					By MS/MS	By MS/MS	0	0	0	0	3.4	3.4
A0A7H2C766;P75960	A0A7H2C766;P75960	4;4	4;4	4;4	NAD-dependent protein deacylase	cobB	tr|A0A7H2C766|A0A7H2C766_ECOLI NAD-dependent protein deacylase OS=Escherichia coli (strain K12) OX=83333 GN=cobB PE=3 SV=1;sp|P75960|NPD_ECOLI NAD-dependent protein deacylase OS=Escherichia coli (strain K12) OX=83333 GN=cobB PE=1 SV=3	2	4	4	4	0	0	0	2	4	1	0	0	0	2	4	1	0	0	0	2	4	1	27.3	27.3	27.3	26.716	242	242;279	0	33.833				By MS/MS	By MS/MS	By MS/MS	0	0	0	13.6	27.3	5.8
CON__A2A4G1;CON__P35900;CON__Q9D312;CON__Q8N1A0	CON__A2A4G1	9;2;2;1	1;0;0;0	1;0;0;0				4	9	1	1	7	7	5	7	5	7	0	0	0	0	0	1	0	0	0	0	0	1	11.8	2	2	49.493	456	456;424;431;295	1	-2	By matching	By matching	By matching	By matching	By matching	By MS/MS	9.4	9.9	9	9.4	9	11.4
CON__ENSEMBL:ENSBTAP00000038253	CON__ENSEMBL:ENSBTAP00000038253	13	1	0				1	13	1	0	12	12	10	12	13	12	0	1	1	0	1	0	0	0	0	0	0	0	16	1.7	0	63.165	606	606	0.0066269	2.5977	By matching	By matching	By MS/MS	By matching	By MS/MS	By matching	14.4	15.5	12.2	14.4	16	14.4
CON__ENSEMBL:ENSP00000377550	CON__ENSEMBL:ENSP00000377550	8	1	0				1	8	1	0	5	6	6	5	7	6	0	0	1	0	1	1	0	0	0	0	0	0	14.3	2.1	0	45.771	420	420	0.0054459	2.9791	By matching	By matching	By matching	By matching	By MS/MS	By matching	9.5	10	11.7	9.5	13.8	11.7
CON__P00761	CON__P00761	8	8	8				1	8	8	8	7	5	7	8	7	6	7	5	7	8	7	6	7	5	7	8	7	6	26.8	26.8	26.8	24.409	231	231	0	323.31	By MS/MS	By MS/MS	By MS/MS	By MS/MS	By MS/MS	By MS/MS	26.8	25.1	26.8	26.8	26.8	25.1
CON__P02533;CON__Q6IFX2;CON__P19001;CON__Q61782	CON__P02533	26;11;6;3	15;6;1;1	7;3;0;1				4	26	15	7	23	22	20	21	19	22	14	12	13	12	12	14	6	7	6	4	6	6	55.5	37.9	23.9	51.621	472	472;452;403;93	0	106.07	By MS/MS	By MS/MS	By MS/MS	By MS/MS	By MS/MS	By MS/MS	48.5	51.9	45.8	43	44.5	48.5
CON__P02535-1	CON__P02535-1	11	1	0				1	11	1	0	9	9	9	9	8	9	0	0	0	0	1	0	0	0	0	0	0	0	15.1	1.6	0	57.769	570	570	1	-2	By matching	By matching	By matching	By matching	By MS/MS	By matching	12.3	12.3	12.3	11.4	11.6	12.3
CON__P02538;CON__O95678;CON__Q8VED5;CON__P07744;CON__H-INV:HIT000292931;CON__Q6IME9;CON__Q61726;CON__O43790;CON__Q6NT21;CON__P78385;CON__Q14533;CON__P78386	CON__P02538	32;13;9;5;3;3;1;1;1;1;1;1	2;0;0;0;0;0;0;0;0;0;0;0	2;0;0;0;0;0;0;0;0;0;0;0				12	32	2	2	26	25	18	24	19	22	1	2	1	1	1	1	1	2	1	1	1	1	46.3	3.5	3.5	60.044	564	564;551;531;525;443;520;479;486;493;493;505;507	0	6.0391	By MS/MS	By MS/MS	By matching	By MS/MS	By MS/MS	By matching	35.1	42.2	29.8	35.1	32.8	34.2
CON__P02662	CON__P02662	5	5	5				1	5	5	5	4	3	3	2	1	4	4	3	3	2	1	4	4	3	3	2	1	4	31.7	31.7	31.7	22.975	199	199	0	101.37	By MS/MS	By MS/MS	By MS/MS	By MS/MS	By MS/MS	By MS/MS	22.1	18.6	18.6	13.6	6	28.1
CON__P02663	CON__P02663	3	3	3				1	3	3	3	3	3	3	2	1	3	3	3	3	2	1	3	3	3	3	2	1	3	14.5	14.5	14.5	24.348	207	207	0	8.447	By MS/MS	By MS/MS	By MS/MS	By MS/MS	By MS/MS	By MS/MS	14.5	14.5	14.5	10.6	5.3	14.5
CON__P02666	CON__P02666	2	2	2				1	2	2	2	1	2	2	1	2	2	1	2	2	1	2	2	1	2	2	1	2	2	12.4	12.4	12.4	23.583	209	209	0	55.53	By MS/MS	By MS/MS	By MS/MS	By matching	By matching	By MS/MS	3.3	12.4	12.4	3.3	12.4	12.4
CON__P02668	CON__P02668	3	3	3				1	3	3	3	1	0	0	0	0	3	1	0	0	0	0	3	1	0	0	0	0	3	23.7	23.7	23.7	18.974	169	169	0	18.213	By MS/MS					By MS/MS	10.7	0	0	0	0	23.7
CON__P02754	CON__P02754	3	3	3				1	3	3	3	1	1	0	0	1	3	1	1	0	0	1	3	1	1	0	0	1	3	24.7	24.7	24.7	18.281	162	162	0	17.452	By matching	By MS/MS			By matching	By MS/MS	5.6	6.8	0	0	6.8	24.7
CON__P02768-1	CON__P02768-1	11	8	8				1	11	8	8	9	2	5	8	6	2	6	1	2	5	3	1	6	1	2	5	3	1	17.2	13.6	13.6	69.366	609	609	0	18.413	By MS/MS	By matching	By MS/MS	By MS/MS	By MS/MS	By matching	13.8	4.1	6.6	12.3	8.4	3.8
CON__P02769	CON__P02769	11	11	8				1	11	11	8	9	3	11	7	6	5	9	3	11	7	6	5	6	2	8	4	3	4	18.6	18.6	15	69.293	607	607	0	43.959	By MS/MS	By MS/MS	By MS/MS	By MS/MS	By MS/MS	By MS/MS	14.7	6.6	18.6	10.5	9.1	9.2
CON__P04259	CON__P04259	32	1	1				1	32	1	1	27	22	16	23	17	20	1	0	0	0	0	0	1	0	0	0	0	0	45.4	3	3	59.998	564	564	0.0066401	2.647	By MS/MS	By matching	By matching	By matching	By matching	By matching	36	35.6	25	32.1	28	29.4
CON__P04264;CON__H-INV:HIT000016045	CON__P04264	39;3	34;1	24;0				2	39	34	24	35	31	31	36	30	32	30	27	27	31	26	28	21	19	20	21	18	20	57.8	54	42.2	66.017	644	644;99	0	323.31	By MS/MS	By MS/MS	By MS/MS	By MS/MS	By MS/MS	By MS/MS	50.5	53.9	54	50.6	50.2	55.1
CON__P05787;CON__Q9DCV7;CON__Q3KNV1;CON__P08729;CON__Q9NSB2;CON__Q6ISB0;CON__Q9H552	CON__P05787;CON__Q9DCV7;CON__Q3KNV1;CON__P08729;CON__Q9NSB2;CON__Q6ISB0	8;4;4;4;4;4;3	1;1;1;1;1;1;1	1;1;1;1;1;1;1			;;;;;	7	8	1	1	7	6	5	6	6	5	1	0	0	0	1	0	1	0	0	0	1	0	8.9	1.7	1.7	53.704	483	483;457;469;469;600;600;499	1	-2	By matching	By matching	By matching	By matching	By MS/MS	By matching	7	6.8	5	5.4	8.1	5
CON__P07477	CON__P07477	1	1	1				1	1	1	1	1	1	1	1	1	1	1	1	1	1	1	1	1	1	1	1	1	1	8.1	8.1	8.1	26.558	247	247	0	39.785	By MS/MS	By MS/MS	By MS/MS	By MS/MS	By MS/MS	By MS/MS	8.1	8.1	8.1	8.1	8.1	8.1
CON__P08779;CON__Q9Z2K1;CON__Q3ZAW8	CON__P08779	27;8;8	22;6;6	15;3;3				3	27	22	15	16	21	12	18	17	11	11	17	9	13	14	7	7	10	5	9	9	3	53.3	48	33.4	51.267	473	473;469;474	0	173.71	By MS/MS	By MS/MS	By MS/MS	By MS/MS	By MS/MS	By MS/MS	31.3	47.6	25.2	37.4	40.2	19.9
CON__P13645;CON__Q7Z3Y7;CON__Q148H6;CON__Q7Z3Y8;CON__Q2M2I5;CON__Q99456;CON__P05784;CON__Q7Z3Z0;CON__REFSEQ:XP_986630;CON__O76014;CON__O76013;CON__Q14525;CON__Q9UE12;CON__Q497I4;CON__A2AB72;CON__Q14532;CON__Q92764;CON__A2A5Y0;CON__Q15323;CON__O76015	CON__P13645	33;3;3;2;2;2;2;2;1;1;1;1;1;1;1;1;1;1;1;1	32;3;3;2;2;1;1;2;1;1;1;1;1;1;1;1;1;1;1;1	20;1;1;1;0;0;0;1;0;0;0;0;0;0;0;0;0;0;0;0				20	33	32	20	27	28	29	27	23	30	26	27	28	26	22	29	15	17	19	15	15	19	59.4	59.4	46.5	59.51	593	593;486;464;459;525;494;423;450;476;471;467;404;416;455;453;448;425;416;416;456	0	323.31	By MS/MS	By MS/MS	By MS/MS	By MS/MS	By MS/MS	By MS/MS	45.4	53.3	56.8	42.7	47.2	57.2
CON__P13647	CON__P13647	35	27	7				1	35	27	7	29	26	23	23	22	26	22	19	16	16	17	19	5	4	3	2	2	3	50.2	43.7	14.2	62.378	590	590	0	209.18	By MS/MS	By MS/MS	By MS/MS	By MS/MS	By MS/MS	By MS/MS	39	42.5	36.9	30.7	35.4	41.2
CON__P15497	CON__P15497	7	7	7				1	7	7	7	7	5	6	3	1	2	7	5	6	3	1	2	7	5	6	3	1	2	30.9	30.9	30.9	30.276	265	265	0	24.237	By MS/MS	By MS/MS	By MS/MS	By MS/MS	By MS/MS	By MS/MS	30.9	20.8	26	12.8	3.4	10.2
CON__P19013	CON__P19013	5	2	2				1	5	2	2	2	4	2	3	3	2	0	1	0	1	0	0	0	1	0	1	0	0	7.4	3	3	63.91	594	594	0	4.3339	By matching	By MS/MS	By matching	By MS/MS	By matching	By matching	2.7	5.9	2.9	4.2	4.4	2.7
CON__P20930	CON__P20930	2	2	2				1	2	2	2	2	0	1	2	0	1	2	0	1	2	0	1	2	0	1	2	0	1	0.7	0.7	0.7	435.16	4061	4061	0	6.4971	By MS/MS		By matching	By MS/MS		By matching	0.7	0	0.2	0.7	0	0.2
CON__P35527	CON__P35527	36	36	35				1	36	36	35	27	26	26	30	25	28	27	26	26	30	25	28	26	25	25	29	24	27	68.7	68.7	68.7	62.129	623	623	0	323.31	By MS/MS	By MS/MS	By MS/MS	By MS/MS	By MS/MS	By MS/MS	54.3	60	55.1	59.9	47.5	55.2
CON__P35908;CON__Q6NXH9;CON__REFSEQ:XP_932229	CON__P35908	45;4;1	45;4;1	1;0;0				3	45	45	1	41	39	40	33	34	38	41	39	40	33	34	38	1	1	1	1	1	1	78.6	78.6	5.6	65.865	645	645;539;345	0	323.31	By MS/MS	By MS/MS	By MS/MS	By MS/MS	By MS/MS	By MS/MS	71.8	76.9	73.2	55.5	68.4	69.5
CON__P35908v2	CON__P35908v2	45	1	1				1	45	1	1	41	39	39	33	34	38	1	1	0	1	1	1	1	1	0	1	1	1	78.4	4.7	4.7	65.432	639	639	0	20.162	By MS/MS	By MS/MS	By matching	By MS/MS	By matching	By MS/MS	71.5	76.7	68.2	55.1	68.1	69.2
CON__P48668	CON__P48668	32	14	0				1	32	14	0	27	23	17	24	18	21	11	10	5	10	7	6	0	0	0	0	0	0	45.4	23.6	0	60.024	564	564	0	115.82	By MS/MS	By MS/MS	By MS/MS	By MS/MS	By MS/MS	By MS/MS	36	38.7	28	35.1	31	32.4
CON__Q04695;CON__Q9C075;CON__Q99PS0	CON__Q04695	19;1;1	6;1;1	1;0;0				3	19	6	1	15	14	12	14	12	14	3	4	2	2	3	2	0	1	0	0	0	0	33.6	12.5	1.6	48.105	432	432;422;422	0	14.529	By MS/MS	By MS/MS	By MS/MS	By matching	By MS/MS	By MS/MS	27.5	25.5	22.5	25.5	23.1	25.5
CON__Q5D862	CON__Q5D862	4	4	4				1	4	4	4	1	4	4	1	1	4	1	4	4	1	1	4	1	4	4	1	1	4	2.2	2.2	2.2	248.07	2391	2391	0	18.083	By MS/MS	By MS/MS	By MS/MS	By MS/MS	By MS/MS	By MS/MS	0.5	2.2	2.2	0.5	0.5	2.2
CON__Q6KB66-1;CON__Q0VBK2	CON__Q6KB66-1	4;1	4;1	4;1				2	4	4	4	1	1	4	0	0	0	1	1	4	0	0	0	1	1	4	0	0	0	10	10	10	50.525	452	452;452	0	8.9868	By MS/MS	By MS/MS	By MS/MS				2.2	2	10	0	0	0
CON__Q7RTS7;CON__Q32MB2	CON__Q7RTS7;CON__Q32MB2	5;4	1;0	0;0			;	2	5	1	0	2	4	4	2	3	3	0	0	0	0	1	0	0	0	0	0	0	0	7.4	2.3	0	57.865	529	529;540	0	32.002	By matching	By matching	By matching	By matching	By MS/MS	By matching	1.7	5.1	5.1	1.7	5.5	3.2
CON__Q8N1N4-2;CON__Q7RTT2	CON__Q8N1N4-2;CON__Q7RTT2	11;11	7;7	7;7			;	2	11	7	7	6	9	10	4	6	6	5	6	6	3	4	4	5	6	6	3	4	4	20.2	13.2	13.2	56.964	521	521;521	0	16.591	By MS/MS	By MS/MS	By MS/MS	By MS/MS	By MS/MS	By MS/MS	10.7	16.5	18	6.7	11.1	10.7
CON__Q7Z3Y9	CON__Q7Z3Y9	2	1	1				1	2	1	1	2	1	2	2	1	2	1	0	1	1	0	1	1	0	1	1	0	1	3.8	1.9	1.9	51.91	468	468	1	-2	By MS/MS	By matching	By MS/MS	By matching	By matching	By matching	3.8	1.9	3.8	3.8	1.9	3.8
CON__Q7Z794	CON__Q7Z794	16	11	9				1	16	11	9	9	9	16	6	5	10	4	4	11	1	1	5	4	4	9	0	1	4	24.9	19.9	16.4	61.802	578	578	0	31.182	By MS/MS	By matching	By MS/MS	By matching	By matching	By MS/MS	12.3	12.3	24.9	6.6	6.6	14.4
CON__Q86YZ3	CON__Q86YZ3	6	6	6				1	6	6	6	6	1	4	6	3	5	6	1	4	6	3	5	6	1	4	6	3	5	7.8	7.8	7.8	282.39	2850	2850	0	36.706	By MS/MS	By MS/MS	By matching	By MS/MS	By MS/MS	By MS/MS	7.8	2.8	6.5	7.8	4.8	7.3
CON__Q922U2	CON__Q922U2	22	1	1				1	22	1	1	16	18	15	18	15	17	0	1	0	0	1	0	0	1	0	0	1	0	28.6	2.4	2.4	61.766	580	580	1	-2	By matching	By matching	By matching	By matching	By MS/MS	By matching	20.3	25.2	20	21.9	23.4	24.3
CON__Streptavidin	CON__Streptavidin	7	7	7				1	7	7	7	5	6	6	4	7	4	5	6	6	4	7	4	5	6	6	4	7	4	49.4	49.4	49.4	16.622	160	160	0	323.31	By MS/MS	By MS/MS	By MS/MS	By MS/MS	By MS/MS	By MS/MS	46.9	49.4	49.4	43.1	49.4	43.1
P00350	P00350	26	26	26	6-phosphogluconate dehydrogenase, decarboxylating	gnd	sp|P00350|6PGD_ECOLI 6-phosphogluconate dehydrogenase, decarboxylating OS=Escherichia coli (strain K12) OX=83333 GN=gnd PE=1 SV=2	1	26	26	26	21	16	19	20	23	23	21	16	19	20	23	23	21	16	19	20	23	23	77.1	77.1	77.1	51.481	468	468	0	323.31	By MS/MS	By MS/MS	By MS/MS	By MS/MS	By MS/MS	By MS/MS	58.8	51.9	52.8	54.3	73.7	68.6
P00363	P00363	22	22	22	Fumarate reductase flavoprotein subunit	frdA	sp|P00363|FRDA_ECOLI Fumarate reductase flavoprotein subunit OS=Escherichia coli (strain K12) OX=83333 GN=frdA PE=1 SV=3	1	22	22	22	10	10	10	18	19	18	10	10	10	18	19	18	10	10	10	18	19	18	47.8	47.8	47.8	65.971	602	602	0	242.55	By MS/MS	By MS/MS	By MS/MS	By MS/MS	By MS/MS	By MS/MS	19.9	18.4	16.3	40.2	36.9	38.4
P00370	P00370	1	1	1	NADP-specific glutamate dehydrogenase	gdhA	sp|P00370|DHE4_ECOLI NADP-specific glutamate dehydrogenase OS=Escherichia coli (strain K12) OX=83333 GN=gdhA PE=1 SV=1	1	1	1	1	0	0	0	0	0	1	0	0	0	0	0	1	0	0	0	0	0	1	4.3	4.3	4.3	48.581	447	447	0.0091743	2.4669						By MS/MS	0	0	0	0	0	4.3
P00393	P00393	24	24	24	NADH dehydrogenase	ndh	sp|P00393|NDH_ECOLI Type II NADH:quinone oxidoreductase OS=Escherichia coli (strain K12) OX=83333 GN=ndh PE=1 SV=2	1	24	24	24	12	11	13	20	20	21	12	11	13	20	20	21	12	11	13	20	20	21	74	74	74	47.358	434	434	0	254.42	By MS/MS	By MS/MS	By MS/MS	By MS/MS	By MS/MS	By MS/MS	35.3	35.3	40.6	56.2	65	61.8
P00448	P00448	8	8	8	Superoxide dismutase [Mn]	sodA	sp|P00448|SODM_ECOLI Superoxide dismutase [Mn] OS=Escherichia coli (strain K12) OX=83333 GN=sodA PE=1 SV=2	1	8	8	8	8	7	7	8	8	8	8	7	7	8	8	8	8	7	7	8	8	8	49.5	49.5	49.5	23.097	206	206	0	94.344	By MS/MS	By MS/MS	By MS/MS	By MS/MS	By MS/MS	By MS/MS	49.5	44.2	44.2	49.5	49.5	49.5
P00452	P00452	33	33	33	Ribonucleoside-diphosphate reductase 1 subunit alpha	nrdA	sp|P00452|RIR1_ECOLI Ribonucleoside-diphosphate reductase 1 subunit alpha OS=Escherichia coli (strain K12) OX=83333 GN=nrdA PE=1 SV=2	1	33	33	33	16	15	19	31	32	33	16	15	19	31	32	33	16	15	19	31	32	33	52.4	52.4	52.4	85.774	761	761	0	323.31	By MS/MS	By MS/MS	By MS/MS	By MS/MS	By MS/MS	By MS/MS	25.4	22.5	30.2	52.2	51.4	52.4
P00490	P00490	26	26	26	Maltodextrin phosphorylase	malP	sp|P00490|PHSM_ECOLI Maltodextrin phosphorylase OS=Escherichia coli (strain K12) OX=83333 GN=malP PE=1 SV=7	1	26	26	26	14	17	15	22	17	19	14	17	15	22	17	19	14	17	15	22	17	19	43.3	43.3	43.3	90.521	797	797	0	209.88	By MS/MS	By MS/MS	By MS/MS	By MS/MS	By MS/MS	By MS/MS	22.8	27	25.6	37.8	27.6	32
P00509	P00509	25	25	25	Aspartate aminotransferase	aspC	sp|P00509|AAT_ECOLI Aspartate aminotransferase OS=Escherichia coli (strain K12) OX=83333 GN=aspC PE=1 SV=1	1	25	25	25	21	24	23	20	22	19	21	24	23	20	22	19	21	24	23	20	22	19	72.5	72.5	72.5	43.573	396	396	0	323.31	By MS/MS	By MS/MS	By MS/MS	By MS/MS	By MS/MS	By MS/MS	61.9	68.7	68.7	59.6	66.9	54.5
P00547	P00547	4	4	4	Homoserine kinase	thrB	sp|P00547|KHSE_ECOLI Homoserine kinase OS=Escherichia coli (strain K12) OX=83333 GN=thrB PE=1 SV=2	1	4	4	4	0	1	0	1	2	1	0	1	0	1	2	1	0	1	0	1	2	1	18.7	18.7	18.7	33.623	310	310	0	18.557		By MS/MS		By MS/MS	By MS/MS	By MS/MS	0	2.6	0	2.6	12.9	3.2
P00550	P00550	9	9	9	PTS system mannitol-specific EIICBA component;Mannitol permease IIC component;Mannitol-specific phosphotransferase enzyme IIB component;Mannitol-specific phosphotransferase enzyme IIA component	mtlA	sp|P00550|PTM3C_ECOLI PTS system mannitol-specific EIICBA component OS=Escherichia coli (strain K12) OX=83333 GN=mtlA PE=1 SV=1	1	9	9	9	1	2	3	6	7	6	1	2	3	6	7	6	1	2	3	6	7	6	20.3	20.3	20.3	67.971	637	637	0	40.172	By matching	By MS/MS	By matching	By MS/MS	By MS/MS	By MS/MS	2.8	2.8	9.6	14	15.9	13.2
P00561	P00561	25	25	25	Bifunctional aspartokinase/homoserine dehydrogenase 1;Aspartokinase;Homoserine dehydrogenase	thrA	sp|P00561|AK1H_ECOLI Bifunctional aspartokinase/homoserine dehydrogenase 1 OS=Escherichia coli (strain K12) OX=83333 GN=thrA PE=1 SV=2	1	25	25	25	8	9	8	18	21	17	8	9	8	18	21	17	8	9	8	18	21	17	41	41	41	89.119	820	820	0	241.14	By MS/MS	By MS/MS	By MS/MS	By MS/MS	By MS/MS	By MS/MS	12.7	12.8	12.8	27.4	35.6	26
P00562	P00562	36	36	36	Bifunctional aspartokinase/homoserine dehydrogenase 2;Aspartokinase;Homoserine dehydrogenase	metL	sp|P00562|AK2H_ECOLI Bifunctional aspartokinase/homoserine dehydrogenase 2 OS=Escherichia coli (strain K12) OX=83333 GN=metL PE=1 SV=3	1	36	36	36	3	4	4	34	30	32	3	4	4	34	30	32	3	4	4	34	30	32	59.3	59.3	59.3	88.887	810	810	0	323.31	By matching	By matching	By matching	By MS/MS	By MS/MS	By MS/MS	4.1	5.6	4.9	58.4	51.5	53.1
P00579;P13445	P00579	20;1	20;1	20;1	RNA polymerase sigma factor RpoD	rpoD	sp|P00579|RPOD_ECOLI RNA polymerase sigma factor RpoD OS=Escherichia coli (strain K12) OX=83333 GN=rpoD PE=1 SV=2	2	20	20	20	14	12	10	18	18	16	14	12	10	18	18	16	14	12	10	18	18	16	37.4	37.4	37.4	70.263	613	613;330	0	318.12	By MS/MS	By MS/MS	By MS/MS	By MS/MS	By MS/MS	By MS/MS	23.5	20.9	15.8	34.1	30.8	27.6
P00582	P00582	27	27	27	DNA polymerase I	polA	sp|P00582|DPO1_ECOLI DNA polymerase I OS=Escherichia coli (strain K12) OX=83333 GN=polA PE=1 SV=1	1	27	27	27	8	7	6	22	22	18	8	7	6	22	22	18	8	7	6	22	22	18	43.2	43.2	43.2	103.12	928	928	0	230.41	By MS/MS	By MS/MS	By MS/MS	By MS/MS	By MS/MS	By MS/MS	10.1	12.4	9.2	38	33.8	29.6
P00722	P00722	2	2	2	Beta-galactosidase	lacZ	sp|P00722|BGAL_ECOLI Beta-galactosidase OS=Escherichia coli (strain K12) OX=83333 GN=lacZ PE=1 SV=2	1	2	2	2	1	1	1	1	1	1	1	1	1	1	1	1	1	1	1	1	1	1	2.4	2.4	2.4	116.48	1024	1024	0	4.1897	By MS/MS	By MS/MS	By MS/MS	By MS/MS	By MS/MS	By MS/MS	1.1	1.4	1.1	1.1	1.1	1.1
P00803	P00803	7	7	7	Signal peptidase I	lepB	sp|P00803|LEP_ECOLI Signal peptidase I OS=Escherichia coli (strain K12) OX=83333 GN=lepB PE=1 SV=2	1	7	7	7	7	5	4	7	7	6	7	5	4	7	7	6	7	5	4	7	7	6	23.8	23.8	23.8	35.96	324	324	0	23.114	By MS/MS	By MS/MS	By MS/MS	By MS/MS	By MS/MS	By MS/MS	23.8	18.2	14.2	23.8	23.8	21.3
P00805	P00805	13	13	13	L-asparaginase 2	ansB	sp|P00805|ASPG2_ECOLI L-asparaginase 2 OS=Escherichia coli (strain K12) OX=83333 GN=ansB PE=1 SV=2	1	13	13	13	5	7	7	7	11	11	5	7	7	7	11	11	5	7	7	7	11	11	53.4	53.4	53.4	36.85	348	348	0	129.71	By MS/MS	By MS/MS	By MS/MS	By MS/MS	By MS/MS	By MS/MS	19.5	27	27.9	25.9	46	44.8
P00864	P00864	33	33	33	Phosphoenolpyruvate carboxylase	ppc	sp|P00864|CAPP_ECOLI Phosphoenolpyruvate carboxylase OS=Escherichia coli (strain K12) OX=83333 GN=ppc PE=1 SV=1	1	33	33	33	12	9	9	31	28	31	12	9	9	31	28	31	12	9	9	31	28	31	42	42	42	99.061	883	883	0	243.7	By MS/MS	By MS/MS	By MS/MS	By MS/MS	By MS/MS	By MS/MS	15.5	12.3	11.7	39.9	36.1	39.4
P00887	P00887	8	8	8	Phospho-2-dehydro-3-deoxyheptonate aldolase, Trp-sensitive	aroH	sp|P00887|AROH_ECOLI Phospho-2-dehydro-3-deoxyheptonate aldolase, Trp-sensitive OS=Escherichia coli (strain K12) OX=83333 GN=aroH PE=1 SV=4	1	8	8	8	2	2	2	7	7	5	2	2	2	7	7	5	2	2	2	7	7	5	32.2	32.2	32.2	38.735	348	348	0	68.344	By matching	By MS/MS	By matching	By MS/MS	By MS/MS	By MS/MS	6.3	6	6	28.4	27.6	22.1
P00888	P00888	7	7	6	Phospho-2-dehydro-3-deoxyheptonate aldolase, Tyr-sensitive	aroF	sp|P00888|AROF_ECOLI Phospho-2-dehydro-3-deoxyheptonate aldolase, Tyr-sensitive OS=Escherichia coli (strain K12) OX=83333 GN=aroF PE=1 SV=1	1	7	7	6	0	1	0	2	6	4	0	1	0	2	6	4	0	1	0	2	5	3	30.3	30.3	28.4	38.804	356	356	0	38.306		By matching		By MS/MS	By MS/MS	By MS/MS	0	2.5	0	9.8	23	16.9
P00926	P00926	11	11	11	D-serine dehydratase	dsdA	sp|P00926|SDHD_ECOLI D-serine dehydratase OS=Escherichia coli (strain K12) OX=83333 GN=dsdA PE=1 SV=3	1	11	11	11	4	3	3	10	5	6	4	3	3	10	5	6	4	3	3	10	5	6	41.4	41.4	41.4	47.9	442	442	0	56.182	By MS/MS	By MS/MS	By matching	By MS/MS	By MS/MS	By MS/MS	12.2	11.1	8.1	38.7	18.6	26.2
P00934	P00934	13	13	13	Threonine synthase	thrC	sp|P00934|THRC_ECOLI Threonine synthase OS=Escherichia coli (strain K12) OX=83333 GN=thrC PE=1 SV=1	1	13	13	13	8	3	5	13	10	10	8	3	5	13	10	10	8	3	5	13	10	10	44.2	44.2	44.2	47.113	428	428	0	187.38	By MS/MS	By MS/MS	By matching	By MS/MS	By MS/MS	By MS/MS	25.2	8.6	19.9	44.2	34.8	32.5
P00936	P00936	4	4	4	Adenylate cyclase	cyaA	sp|P00936|CYAA_ECOLI Adenylate cyclase OS=Escherichia coli (strain K12) OX=83333 GN=cyaA PE=1 SV=5	1	4	4	4	1	0	1	1	2	3	1	0	1	1	2	3	1	0	1	1	2	3	5.4	5.4	5.4	97.585	848	848	0	7.5974	By MS/MS		By MS/MS	By MS/MS	By MS/MS	By MS/MS	1.8	0	1.8	1.5	2.6	4.4
P00946	P00946	10	10	10	Mannose-6-phosphate isomerase	manA	sp|P00946|MANA_ECOLI Mannose-6-phosphate isomerase OS=Escherichia coli (strain K12) OX=83333 GN=manA PE=1 SV=1	1	10	10	10	3	3	7	5	8	7	3	3	7	5	8	7	3	3	7	5	8	7	33	33	33	42.849	391	391	0	64.549	By MS/MS	By MS/MS	By MS/MS	By MS/MS	By MS/MS	By MS/MS	9.7	12.8	20.5	18.7	28.1	20.2
P00954	P00954	13	13	13	Tryptophan--tRNA ligase	trpS	sp|P00954|SYW_ECOLI Tryptophan--tRNA ligase OS=Escherichia coli (strain K12) OX=83333 GN=trpS PE=1 SV=3	1	13	13	13	8	6	8	13	12	11	8	6	8	13	12	11	8	6	8	13	12	11	49.4	49.4	49.4	37.437	334	334	0	323.31	By MS/MS	By MS/MS	By MS/MS	By MS/MS	By MS/MS	By MS/MS	32.6	24	29.9	49.4	41.9	41.3
P00956	P00956	35	35	35	Isoleucine--tRNA ligase	ileS	sp|P00956|SYI_ECOLI Isoleucine--tRNA ligase OS=Escherichia coli (strain K12) OX=83333 GN=ileS PE=1 SV=5	1	35	35	35	19	18	19	27	30	31	19	18	19	27	30	31	19	18	19	27	30	31	56	56	56	104.3	938	938	0	235.69	By MS/MS	By MS/MS	By MS/MS	By MS/MS	By MS/MS	By MS/MS	24.1	24.2	27.6	45.9	47.7	47
P00957	P00957	44	44	44	Alanine--tRNA ligase	alaS	sp|P00957|SYA_ECOLI Alanine--tRNA ligase OS=Escherichia coli (strain K12) OX=83333 GN=alaS PE=1 SV=2	1	44	44	44	32	28	32	35	42	36	32	28	32	35	42	36	32	28	32	35	42	36	64.5	64.5	64.5	96.031	876	876	0	323.31	By MS/MS	By MS/MS	By MS/MS	By MS/MS	By MS/MS	By MS/MS	47.6	43	47.6	53.2	60.8	52.9
P00959	P00959	29	29	29	Methionine--tRNA ligase	metG	sp|P00959|SYM_ECOLI Methionine--tRNA ligase OS=Escherichia coli (strain K12) OX=83333 GN=metG PE=1 SV=2	1	29	29	29	15	12	13	23	27	24	15	12	13	23	27	24	15	12	13	23	27	24	55.1	55.1	55.1	76.254	677	677	0	323.31	By MS/MS	By MS/MS	By MS/MS	By MS/MS	By MS/MS	By MS/MS	27	21.1	23.6	44.3	49.2	49.8
P00960	P00960	9	9	9	Glycine--tRNA ligase alpha subunit	glyQ	sp|P00960|SYGA_ECOLI Glycine--tRNA ligase alpha subunit OS=Escherichia coli (strain K12) OX=83333 GN=glyQ PE=1 SV=2	1	9	9	9	3	6	5	8	9	8	3	6	5	8	9	8	3	6	5	8	9	8	44.2	44.2	44.2	34.774	303	303	0	157.52	By MS/MS	By MS/MS	By MS/MS	By MS/MS	By MS/MS	By MS/MS	14.9	26.1	22.1	36	44.2	36
P00961	P00961	40	40	40	Glycine--tRNA ligase beta subunit	glyS	sp|P00961|SYGB_ECOLI Glycine--tRNA ligase beta subunit OS=Escherichia coli (strain K12) OX=83333 GN=glyS PE=1 SV=4	1	40	40	40	25	19	26	37	38	34	25	19	26	37	38	34	25	19	26	37	38	34	68.4	68.4	68.4	76.812	689	689	0	323.31	By MS/MS	By MS/MS	By MS/MS	By MS/MS	By MS/MS	By MS/MS	43.8	37	46.6	65.6	67.2	58.5
P00962	P00962	25	25	25	Glutamine--tRNA ligase	glnS	sp|P00962|SYQ_ECOLI Glutamine--tRNA ligase OS=Escherichia coli (strain K12) OX=83333 GN=glnS PE=1 SV=3	1	25	25	25	12	13	16	24	23	23	12	13	16	24	23	23	12	13	16	24	23	23	57.9	57.9	57.9	63.477	554	554	0	323.31	By MS/MS	By MS/MS	By MS/MS	By MS/MS	By MS/MS	By MS/MS	25.3	27.3	34.8	56	52.2	53.4
P00963	P00963	6	6	6	Aspartate--ammonia ligase	asnA	sp|P00963|ASNA_ECOLI Aspartate--ammonia ligase OS=Escherichia coli (strain K12) OX=83333 GN=asnA PE=1 SV=1	1	6	6	6	2	2	1	3	6	4	2	2	1	3	6	4	2	2	1	3	6	4	25.2	25.2	25.2	36.65	330	330	0	50.709	By MS/MS	By MS/MS	By MS/MS	By MS/MS	By MS/MS	By MS/MS	7.3	7.3	3.9	11.8	25.2	15.8
P00968	P00968	33	33	33	Carbamoyl-phosphate synthase large chain	carB	sp|P00968|CARB_ECOLI Carbamoyl-phosphate synthase large chain OS=Escherichia coli (strain K12) OX=83333 GN=carB PE=1 SV=2	1	33	33	33	7	7	4	24	27	24	7	7	4	24	27	24	7	7	4	24	27	24	38.3	38.3	38.3	117.84	1073	1073	0	276.42	By MS/MS	By MS/MS	By matching	By MS/MS	By MS/MS	By MS/MS	9	9.5	6.1	29.8	33.3	31.2
P02358	P02358	7	7	7	30S ribosomal protein S6;30S ribosomal protein S6, fully modified isoform;30S ribosomal protein S6, non-modified isoform	rpsF	sp|P02358|RS6_ECOLI 30S ribosomal protein S6 OS=Escherichia coli (strain K12) OX=83333 GN=rpsF PE=1 SV=1	1	7	7	7	6	5	7	7	7	6	6	5	7	7	7	6	6	5	7	7	7	6	61.5	61.5	61.5	15.703	135	135	0	168.65	By MS/MS	By MS/MS	By MS/MS	By MS/MS	By MS/MS	By MS/MS	60.7	36.3	61.5	61.5	61.5	60.7
P02359	P02359	11	11	11	30S ribosomal protein S7	rpsG	sp|P02359|RS7_ECOLI 30S ribosomal protein S7 OS=Escherichia coli (strain K12) OX=83333 GN=rpsG PE=1 SV=3	1	11	11	11	10	9	10	10	10	10	10	9	10	10	10	10	10	9	10	10	10	10	55.3	55.3	55.3	20.019	179	179	0	323.31	By MS/MS	By MS/MS	By MS/MS	By MS/MS	By MS/MS	By MS/MS	54.7	50.8	54.7	54.7	55.3	54.7
P02413	P02413	5	5	5	50S ribosomal protein L15	rplO	sp|P02413|RL15_ECOLI 50S ribosomal protein L15 OS=Escherichia coli (strain K12) OX=83333 GN=rplO PE=1 SV=1	1	5	5	5	5	5	5	5	5	5	5	5	5	5	5	5	5	5	5	5	5	5	42.4	42.4	42.4	14.98	144	144	0	88.347	By MS/MS	By MS/MS	By MS/MS	By MS/MS	By MS/MS	By MS/MS	42.4	42.4	42.4	42.4	42.4	42.4
P02916	P02916	3	3	3	Maltose transport system permease protein MalF	malF	sp|P02916|MALF_ECOLI Maltose/maltodextrin transport system permease protein MalF OS=Escherichia coli (strain K12) OX=83333 GN=malF PE=1 SV=1	1	3	3	3	2	2	3	2	3	2	2	2	3	2	3	2	2	2	3	2	3	2	7.6	7.6	7.6	57.013	514	514	0	13.551	By matching	By MS/MS	By matching	By MS/MS	By MS/MS	By MS/MS	5.3	3.9	7.6	5.3	7.6	5.3
P02918	P02918	1	1	1	Penicillin-binding protein 1A;Penicillin-insensitive transglycosylase;Penicillin-sensitive transpeptidase	mrcA	sp|P02918|PBPA_ECOLI Penicillin-binding protein 1A OS=Escherichia coli (strain K12) OX=83333 GN=mrcA PE=1 SV=1	1	1	1	1	0	0	1	0	1	0	0	0	1	0	1	0	0	0	1	0	1	0	1.9	1.9	1.9	93.635	850	850	0	10.549			By matching		By MS/MS		0	0	1.9	0	1.9	0
P02925	P02925	14	14	14	D-ribose-binding periplasmic protein	rbsB	sp|P02925|RBSB_ECOLI Ribose import binding protein RbsB OS=Escherichia coli (strain K12) OX=83333 GN=rbsB PE=1 SV=1	1	14	14	14	13	13	12	14	14	14	13	13	12	14	14	14	13	13	12	14	14	14	68.9	68.9	68.9	30.95	296	296	0	323.31	By MS/MS	By MS/MS	By MS/MS	By MS/MS	By MS/MS	By MS/MS	58.4	58.4	58.4	68.9	68.9	68.9
P02929	P02929	2	2	2	Protein TonB	tonB	sp|P02929|TONB_ECOLI Protein TonB OS=Escherichia coli (strain K12) OX=83333 GN=tonB PE=1 SV=2	1	2	2	2	2	1	0	2	1	1	2	1	0	2	1	1	2	1	0	2	1	1	9.2	9.2	9.2	26.094	239	239	0	4.3347	By matching	By matching		By MS/MS	By MS/MS	By matching	9.2	5	0	9.2	4.2	5
P02930	P02930	18	18	18	Outer membrane protein TolC	tolC	sp|P02930|TOLC_ECOLI Outer membrane protein TolC OS=Escherichia coli (strain K12) OX=83333 GN=tolC PE=1 SV=3	1	18	18	18	8	9	8	15	18	14	8	9	8	15	18	14	8	9	8	15	18	14	58.2	58.2	58.2	53.74	493	493	0	175.32	By MS/MS	By MS/MS	By MS/MS	By MS/MS	By MS/MS	By MS/MS	22.3	26.8	22.9	46.9	58.2	44.2
P02931	P02931	8	8	8	Outer membrane protein F	ompF	sp|P02931|OMPF_ECOLI Outer membrane porin F OS=Escherichia coli (strain K12) OX=83333 GN=ompF PE=1 SV=1	1	8	8	8	4	7	6	5	7	5	4	7	6	5	7	5	4	7	6	5	7	5	25.7	25.7	25.7	39.333	362	362	0	48.929	By MS/MS	By MS/MS	By MS/MS	By MS/MS	By MS/MS	By MS/MS	10.5	21	20.7	14.9	23.2	18
P02943	P02943	13	13	13	Maltoporin	lamB	sp|P02943|LAMB_ECOLI Maltoporin OS=Escherichia coli (strain K12) OX=83333 GN=lamB PE=1 SV=1	1	13	13	13	8	8	11	12	10	11	8	8	11	12	10	11	8	8	11	12	10	11	39.9	39.9	39.9	49.912	446	446	0	176.5	By MS/MS	By MS/MS	By MS/MS	By MS/MS	By MS/MS	By MS/MS	24.9	26.2	36.8	38.3	33.4	33.9
P03004	P03004	13	13	13	Chromosomal replication initiator protein DnaA	dnaA	sp|P03004|DNAA_ECOLI Chromosomal replication initiator protein DnaA OS=Escherichia coli (strain K12) OX=83333 GN=dnaA PE=1 SV=2	1	13	13	13	3	2	2	10	8	10	3	2	2	10	8	10	3	2	2	10	8	10	36	36	36	52.55	467	467	0	76.026	By matching	By matching	By matching	By MS/MS	By MS/MS	By MS/MS	5.4	8.8	3.6	27.4	23.3	29.1
P03007	P03007	2	2	2	DNA polymerase III subunit epsilon	dnaQ	sp|P03007|DPO3E_ECOLI DNA polymerase III subunit epsilon OS=Escherichia coli (strain K12) OX=83333 GN=dnaQ PE=1 SV=1	1	2	2	2	0	1	0	1	1	0	0	1	0	1	1	0	0	1	0	1	1	0	7.4	7.4	7.4	27.099	243	243	0.0021008	3.3879		By matching		By MS/MS	By MS/MS		0	3.7	0	3.7	3.7	0
P03018	P03018	6	6	6	DNA helicase II	uvrD	sp|P03018|UVRD_ECOLI DNA helicase II OS=Escherichia coli (strain K12) OX=83333 GN=uvrD PE=1 SV=1	1	6	6	6	1	1	0	5	5	4	1	1	0	5	5	4	1	1	0	5	5	4	9.4	9.4	9.4	81.989	720	720	0	30.949	By matching	By matching		By MS/MS	By MS/MS	By MS/MS	1.2	1.2	0	7.8	7.6	6.4
P03817	P03817	2	2	2	Protein MioC	mioC	sp|P03817|MIOC_ECOLI Protein MioC OS=Escherichia coli (strain K12) OX=83333 GN=mioC PE=1 SV=4	1	2	2	2	2	0	2	2	2	2	2	0	2	2	2	2	2	0	2	2	2	2	22.4	22.4	22.4	15.807	147	147	0	14.789	By MS/MS		By MS/MS	By MS/MS	By MS/MS	By MS/MS	22.4	0	22.4	22.4	22.4	22.4
P03841	P03841	9	9	9	Maltose operon periplasmic protein	malM	sp|P03841|MALM_ECOLI Maltose operon periplasmic protein OS=Escherichia coli (strain K12) OX=83333 GN=malM PE=3 SV=1	1	9	9	9	8	2	4	8	6	5	8	2	4	8	6	5	8	2	4	8	6	5	41.5	41.5	41.5	31.943	306	306	0	56.086	By MS/MS	By MS/MS	By MS/MS	By MS/MS	By MS/MS	By MS/MS	35.9	5.2	16	35.9	33	18.3
P04036	P04036	11	11	11	4-hydroxy-tetrahydrodipicolinate reductase	dapB	sp|P04036|DAPB_ECOLI 4-hydroxy-tetrahydrodipicolinate reductase OS=Escherichia coli (strain K12) OX=83333 GN=dapB PE=1 SV=1	1	11	11	11	4	0	1	11	8	9	4	0	1	11	8	9	4	0	1	11	8	9	52.7	52.7	52.7	28.756	273	273	0	69.041	By matching		By matching	By MS/MS	By MS/MS	By MS/MS	19.8	0	4.8	52.7	41.4	45.4
P04079	P04079	27	27	27	GMP synthase [glutamine-hydrolyzing]	guaA	sp|P04079|GUAA_ECOLI GMP synthase [glutamine-hydrolyzing] OS=Escherichia coli (strain K12) OX=83333 GN=guaA PE=1 SV=1	1	27	27	27	18	10	15	26	26	23	18	10	15	26	26	23	18	10	15	26	26	23	65.1	65.1	65.1	58.679	525	525	0	323.31	By MS/MS	By MS/MS	By MS/MS	By MS/MS	By MS/MS	By MS/MS	47.2	25.7	44.4	65.1	63.2	61.7
P04335	P04335	13	13	13	Esterase FrsA	frsA	sp|P04335|FRSA_ECOLI Esterase FrsA OS=Escherichia coli (strain K12) OX=83333 GN=frsA PE=1 SV=2	1	13	13	13	6	1	3	8	5	6	6	1	3	8	5	6	6	1	3	8	5	6	33.6	33.6	33.6	47.008	414	414	0	44.312	By MS/MS	By MS/MS	By MS/MS	By MS/MS	By MS/MS	By MS/MS	13.8	1.9	6.3	21	13.3	14.3
P04425	P04425	5	5	5	Glutathione synthetase	gshB	sp|P04425|GSHB_ECOLI Glutathione synthetase OS=Escherichia coli (strain K12) OX=83333 GN=gshB PE=1 SV=1	1	5	5	5	0	0	0	3	1	4	0	0	0	3	1	4	0	0	0	3	1	4	20.6	20.6	20.6	35.56	316	316	0	10.451				By MS/MS	By matching	By MS/MS	0	0	0	10.8	3.8	16.8
P04693	P04693	14	14	14	Aromatic-amino-acid aminotransferase	tyrB	sp|P04693|TYRB_ECOLI Aromatic-amino-acid aminotransferase OS=Escherichia coli (strain K12) OX=83333 GN=tyrB PE=1 SV=1	1	14	14	14	2	3	1	14	13	12	2	3	1	14	13	12	2	3	1	14	13	12	53.1	53.1	53.1	43.537	397	397	0	191.46	By MS/MS	By MS/MS	By matching	By MS/MS	By MS/MS	By MS/MS	5.8	10.1	2.3	53.1	45.6	41.8
P04805	P04805	22	22	22	Glutamate--tRNA ligase	gltX	sp|P04805|SYE_ECOLI Glutamate--tRNA ligase OS=Escherichia coli (strain K12) OX=83333 GN=gltX PE=1 SV=1	1	22	22	22	15	14	16	20	20	19	15	14	16	20	20	19	15	14	16	20	20	19	61.6	61.6	61.6	53.815	471	471	0	323.31	By MS/MS	By MS/MS	By MS/MS	By MS/MS	By MS/MS	By MS/MS	41.6	40.3	43.9	57.1	56.5	54.1
P04825	P04825	23	23	23	Aminopeptidase N	pepN	sp|P04825|AMPN_ECOLI Aminopeptidase N OS=Escherichia coli (strain K12) OX=83333 GN=pepN PE=1 SV=2	1	23	23	23	11	9	5	17	18	13	11	9	5	17	18	13	11	9	5	17	18	13	36.9	36.9	36.9	98.918	870	870	0	151.64	By MS/MS	By MS/MS	By MS/MS	By MS/MS	By MS/MS	By MS/MS	16.1	14.9	7.4	27	30.8	21.4
P04951	P04951	4	4	4	3-deoxy-manno-octulosonate cytidylyltransferase	kdsB	sp|P04951|KDSB_ECOLI 3-deoxy-manno-octulosonate cytidylyltransferase OS=Escherichia coli (strain K12) OX=83333 GN=kdsB PE=1 SV=2	1	4	4	4	2	2	2	4	2	2	2	2	2	4	2	2	2	2	2	4	2	2	17.7	17.7	17.7	27.614	248	248	0	9.4237	By matching	By MS/MS	By matching	By MS/MS	By matching	By matching	8.5	9.3	10.5	17.7	9.3	9.3
P04982	P04982	5	5	5	D-ribose pyranase	rbsD	sp|P04982|RBSD_ECOLI D-ribose pyranase OS=Escherichia coli (strain K12) OX=83333 GN=rbsD PE=1 SV=3	1	5	5	5	4	3	4	3	5	4	4	3	4	3	5	4	4	3	4	3	5	4	43.2	43.2	43.2	15.292	139	139	0	34.452	By MS/MS	By MS/MS	By MS/MS	By MS/MS	By MS/MS	By MS/MS	36.7	30.9	36.7	23.7	43.2	36.7
P04983	P04983	26	26	26	Ribose import ATP-binding protein RbsA	rbsA	sp|P04983|RBSA_ECOLI Ribose import ATP-binding protein RbsA OS=Escherichia coli (strain K12) OX=83333 GN=rbsA PE=1 SV=1	1	26	26	26	7	7	10	21	23	24	7	7	10	21	23	24	7	7	10	21	23	24	59.3	59.3	59.3	55.041	501	501	0	323.31	By MS/MS	By MS/MS	By MS/MS	By MS/MS	By MS/MS	By MS/MS	15.8	19.6	21.8	49.1	55.1	55.3
P04993	P04993	2	2	2	RecBCD enzyme subunit RecD	recD	sp|P04993|RECD_ECOLI RecBCD enzyme subunit RecD OS=Escherichia coli (strain K12) OX=83333 GN=recD PE=1 SV=2	1	2	2	2	0	0	0	0	2	0	0	0	0	0	2	0	0	0	0	0	2	0	3	3	3	66.902	608	608	0	4.3755					By MS/MS		0	0	0	0	3	0
P04994	P04994	5	5	5	Exodeoxyribonuclease 7 large subunit	xseA	sp|P04994|EX7L_ECOLI Exodeoxyribonuclease 7 large subunit OS=Escherichia coli (strain K12) OX=83333 GN=xseA PE=1 SV=2	1	5	5	5	3	1	0	4	3	1	3	1	0	4	3	1	3	1	0	4	3	1	12.5	12.5	12.5	51.832	456	456	0	12.13	By MS/MS	By matching		By MS/MS	By MS/MS	By MS/MS	7.7	2.6	0	10.3	7.7	2.6
P05020	P05020	5	5	5	Dihydroorotase	pyrC	sp|P05020|PYRC_ECOLI Dihydroorotase OS=Escherichia coli (strain K12) OX=83333 GN=pyrC PE=1 SV=2	1	5	5	5	2	1	1	2	4	1	2	1	1	2	4	1	2	1	1	2	4	1	17.5	17.5	17.5	38.827	348	348	0	9.0866	By matching	By MS/MS	By matching	By MS/MS	By MS/MS	By matching	8.6	3.4	2.6	9.5	11.5	3.4
P05042	P05042	6	6	6	Fumarate hydratase class II	fumC	sp|P05042|FUMC_ECOLI Fumarate hydratase class II OS=Escherichia coli (strain K12) OX=83333 GN=fumC PE=1 SV=1	1	6	6	6	0	1	2	3	3	3	0	1	2	3	3	3	0	1	2	3	3	3	12.6	12.6	12.6	50.488	467	467	0	11.158		By MS/MS	By matching	By MS/MS	By MS/MS	By MS/MS	0	1.9	3.6	5.8	6.9	6.2
P05055	P05055	30	30	30	Polyribonucleotide nucleotidyltransferase	pnp	sp|P05055|PNP_ECOLI Polyribonucleotide nucleotidyltransferase OS=Escherichia coli (strain K12) OX=83333 GN=pnp PE=1 SV=3	1	30	30	30	21	18	17	27	29	27	21	18	17	27	29	27	21	18	17	27	29	27	55.6	55.6	55.6	77.1	711	711	0	323.31	By MS/MS	By MS/MS	By MS/MS	By MS/MS	By MS/MS	By MS/MS	37.4	34.9	34.2	51.6	54.4	48.4
P05458	P05458	2	2	2	Protease 3	ptrA	sp|P05458|PTRA_ECOLI Protease 3 OS=Escherichia coli (strain K12) OX=83333 GN=ptrA PE=1 SV=1	1	2	2	2	0	0	0	0	1	2	0	0	0	0	1	2	0	0	0	0	1	2	2.5	2.5	2.5	107.71	962	962	0.007874	2.4902					By matching	By MS/MS	0	0	0	0	1.4	2.5
P05459	P05459	10	10	10	Erythronate-4-phosphate dehydrogenase	pdxB	sp|P05459|PDXB_ECOLI Erythronate-4-phosphate dehydrogenase OS=Escherichia coli (strain K12) OX=83333 GN=pdxB PE=2 SV=2	1	10	10	10	2	3	1	6	3	3	2	3	1	6	3	3	2	3	1	6	3	3	35.7	35.7	35.7	41.367	378	378	0	17.568	By MS/MS	By MS/MS	By matching	By MS/MS	By MS/MS	By matching	5.8	9.5	2.6	23.8	8.7	14.3
P05523	P05523	2	2	2	Formamidopyrimidine-DNA glycosylase	mutM	sp|P05523|FPG_ECOLI Formamidopyrimidine-DNA glycosylase OS=Escherichia coli (strain K12) OX=83333 GN=mutM PE=1 SV=3	1	2	2	2	1	0	0	1	2	2	1	0	0	1	2	2	1	0	0	1	2	2	7.8	7.8	7.8	30.29	269	269	0.0021053	3.4058	By MS/MS			By MS/MS	By MS/MS	By matching	4.1	0	0	4.1	7.8	7.8
P05706	P05706	4	4	4	Glucitol/sorbitol-specific phosphotransferase enzyme IIA component	srlB	sp|P05706|PTHA_ECOLI PTS system glucitol/sorbitol-specific EIIA component OS=Escherichia coli (strain K12) OX=83333 GN=srlB PE=1 SV=1	1	4	4	4	2	2	2	4	3	3	2	2	2	4	3	3	2	2	2	4	3	3	56.9	56.9	56.9	13.304	123	123	0	27.657	By MS/MS	By MS/MS	By MS/MS	By MS/MS	By MS/MS	By MS/MS	20.3	20.3	20.3	56.9	44.7	44.7
P05707	P05707	13	13	13	Sorbitol-6-phosphate 2-dehydrogenase	srlD	sp|P05707|SRLD_ECOLI Sorbitol-6-phosphate 2-dehydrogenase OS=Escherichia coli (strain K12) OX=83333 GN=srlD PE=1 SV=2	1	13	13	13	4	4	4	9	13	9	4	4	4	9	13	9	4	4	4	9	13	9	70.7	70.7	70.7	27.858	259	259	0	183.73	By MS/MS	By MS/MS	By matching	By MS/MS	By MS/MS	By MS/MS	15.8	18.9	18.5	40.9	70.7	40.9
P05719	P05719	14	14	14	Type-1 restriction enzyme EcoKI specificity protein	hsdS	sp|P05719|T1SK_ECOLI Type I restriction enzyme EcoKI specificity subunit OS=Escherichia coli (strain K12) OX=83333 GN=hsdS PE=1 SV=1	1	14	14	14	5	2	0	10	10	11	5	2	0	10	10	11	5	2	0	10	10	11	33.4	33.4	33.4	51.395	464	464	0	55.553	By MS/MS	By matching		By MS/MS	By MS/MS	By MS/MS	11.4	4.7	0	24.8	26.9	28.4
P05791	P05791	3	3	3	Dihydroxy-acid dehydratase	ilvD	sp|P05791|ILVD_ECOLI Dihydroxy-acid dehydratase OS=Escherichia coli (strain K12) OX=83333 GN=ilvD PE=1 SV=5	1	3	3	3	2	2	1	2	1	2	2	2	1	2	1	2	2	2	1	2	1	2	6	6	6	65.531	616	616	0	4.4848	By matching	By matching	By matching	By MS/MS	By MS/MS	By MS/MS	4.4	3.9	2.3	4.4	1.6	4.4
P05793	P05793	2	2	2	Ketol-acid reductoisomerase	ilvC	sp|P05793|ILVC_ECOLI Ketol-acid reductoisomerase (NADP(+)) OS=Escherichia coli (strain K12) OX=83333 GN=ilvC PE=1 SV=4	1	2	2	2	0	0	2	0	0	2	0	0	2	0	0	2	0	0	2	0	0	2	5.3	5.3	5.3	54.068	491	491	0	4.7541			By matching			By MS/MS	0	0	5.3	0	0	5.3
P05804	P05804	11	11	11	Beta-glucuronidase	uidA	sp|P05804|BGLR_ECOLI Beta-glucuronidase OS=Escherichia coli (strain K12) OX=83333 GN=uidA PE=1 SV=2	1	11	11	11	0	0	1	5	6	7	0	0	1	5	6	7	0	0	1	5	6	7	20.7	20.7	20.7	68.446	603	603	0	41.623			By matching	By MS/MS	By MS/MS	By MS/MS	0	0	1.8	10	11.6	14.3
P05852	P05852	5	5	5	tRNA N6-adenosine threonylcarbamoyltransferase	tsaD	sp|P05852|TSAD_ECOLI tRNA N6-adenosine threonylcarbamoyltransferase OS=Escherichia coli (strain K12) OX=83333 GN=tsaD PE=1 SV=2	1	5	5	5	2	1	0	5	5	5	2	1	0	5	5	5	2	1	0	5	5	5	20.2	20.2	20.2	36.008	337	337	0	23.706	By matching	By matching		By MS/MS	By MS/MS	By MS/MS	8.6	4.2	0	20.2	20.2	20.2
P06129	P06129	13	13	13	Vitamin B12 transporter BtuB	btuB	sp|P06129|BTUB_ECOLI Vitamin B12 transporter BtuB OS=Escherichia coli (strain K12) OX=83333 GN=btuB PE=1 SV=2	1	13	13	13	3	3	4	5	12	8	3	3	4	5	12	8	3	3	4	5	12	8	28.7	28.7	28.7	68.406	614	614	0	60.599	By MS/MS	By MS/MS	By MS/MS	By MS/MS	By MS/MS	By MS/MS	6.8	7.5	10.1	11.7	26.9	17.4
P06149	P06149	16	16	16	D-lactate dehydrogenase	dld	sp|P06149|DLD_ECOLI Quinone-dependent D-lactate dehydrogenase OS=Escherichia coli (strain K12) OX=83333 GN=dld PE=1 SV=3	1	16	16	16	9	3	4	14	8	7	9	3	4	14	8	7	9	3	4	14	8	7	34.5	34.5	34.5	64.612	571	571	0	46.933	By MS/MS	By MS/MS	By matching	By MS/MS	By MS/MS	By MS/MS	17.5	6.1	8.1	30.6	15.8	13.7
P06610	P06610	1	1	1	Vitamin B12 transport periplasmic protein BtuE	btuE	sp|P06610|BTUE_ECOLI Thioredoxin/glutathione peroxidase BtuE OS=Escherichia coli (strain K12) OX=83333 GN=btuE PE=1 SV=1	1	1	1	1	0	0	0	1	1	1	0	0	0	1	1	1	0	0	0	1	1	1	10.4	10.4	10.4	20.469	183	183	0.0078947	2.5189				By matching	By MS/MS	By matching	0	0	0	10.4	10.4	10.4
P06612	P06612	27	27	27	DNA topoisomerase 1	topA	sp|P06612|TOP1_ECOLI DNA topoisomerase 1 OS=Escherichia coli (strain K12) OX=83333 GN=topA PE=1 SV=2	1	27	27	27	14	14	16	17	23	21	14	14	16	17	23	21	14	14	16	17	23	21	40	40	40	97.349	865	865	0	197.27	By MS/MS	By MS/MS	By MS/MS	By MS/MS	By MS/MS	By MS/MS	20.7	20.3	20.7	22.8	32.7	31.4
P06616	P06616	5	5	5	GTPase Era	era	sp|P06616|ERA_ECOLI GTPase Era OS=Escherichia coli (strain K12) OX=83333 GN=era PE=1 SV=2	1	5	5	5	1	1	1	1	5	2	1	1	1	1	5	2	1	1	1	1	5	2	17.9	17.9	17.9	33.81	301	301	0	27.511	By MS/MS	By MS/MS	By matching	By MS/MS	By MS/MS	By MS/MS	4.3	4.3	4.3	4.3	17.9	7
P06709	P06709	11	11	11	Bifunctional ligase/repressor BirA	birA	sp|P06709|BIRA_ECOLI Bifunctional ligase/repressor BirA OS=Escherichia coli (strain K12) OX=83333 GN=birA PE=1 SV=1	1	11	11	11	8	7	6	7	7	7	8	7	6	7	7	7	8	7	6	7	7	7	45.5	45.5	45.5	35.312	321	321	0	52.484	By MS/MS	By MS/MS	By MS/MS	By MS/MS	By MS/MS	By MS/MS	33.6	28.7	26.8	29.3	30.8	28.3
P06710	P06710	7	7	7	DNA polymerase III subunit tau	dnaX	sp|P06710|DPO3X_ECOLI DNA polymerase III subunit tau OS=Escherichia coli (strain K12) OX=83333 GN=dnaX PE=1 SV=1	1	7	7	7	1	2	0	4	5	5	1	2	0	4	5	5	1	2	0	4	5	5	10.1	10.1	10.1	71.137	643	643	0	16.71	By matching	By matching		By MS/MS	By MS/MS	By MS/MS	1.6	2.6	0	5.8	7.3	6.7
P06715	P06715	13	13	13	Glutathione reductase	gor	sp|P06715|GSHR_ECOLI Glutathione reductase OS=Escherichia coli (strain K12) OX=83333 GN=gor PE=1 SV=1	1	13	13	13	11	9	8	9	8	7	11	9	8	9	8	7	11	9	8	9	8	7	50.4	50.4	50.4	48.772	450	450	0	100.2	By MS/MS	By MS/MS	By MS/MS	By MS/MS	By MS/MS	By MS/MS	36.4	35.6	28.9	30.9	32.9	24.9
P06720	P06720	1	1	1	Alpha-galactosidase	melA	sp|P06720|AGAL_ECOLI Alpha-galactosidase OS=Escherichia coli (strain K12) OX=83333 GN=melA PE=1 SV=1	1	1	1	1	1	1	1	1	1	1	1	1	1	1	1	1	1	1	1	1	1	1	2.2	2.2	2.2	50.657	451	451	0.0078844	2.505	By MS/MS	By MS/MS	By MS/MS	By MS/MS	By matching	By MS/MS	2.2	2.2	2.2	2.2	2.2	2.2
P06959	P06959	34	34	34	Dihydrolipoyllysine-residue acetyltransferase component of pyruvate dehydrogenase complex	aceF	sp|P06959|ODP2_ECOLI Dihydrolipoyllysine-residue acetyltransferase component of pyruvate dehydrogenase complex OS=Escherichia coli (strain K12) OX=83333 GN=aceF PE=1 SV=3	1	34	34	34	28	31	28	31	32	29	28	31	28	31	32	29	28	31	28	31	32	29	72.7	72.7	72.7	66.095	630	630	0	323.31	By MS/MS	By MS/MS	By MS/MS	By MS/MS	By MS/MS	By MS/MS	55.6	63.8	61.6	61.3	64.9	59
P06961	P06961	14	14	14	Multifunctional CCA protein;CCA-adding enzyme;2-nucleotidase;2,3-cyclic phosphodiesterase;Phosphatase	cca	sp|P06961|CCA_ECOLI Multifunctional CCA protein OS=Escherichia coli (strain K12) OX=83333 GN=cca PE=1 SV=1	1	14	14	14	1	1	0	9	7	12	1	1	0	9	7	12	1	1	0	9	7	12	38.6	38.6	38.6	46.467	412	412	0	53.589	By matching	By matching		By MS/MS	By MS/MS	By MS/MS	1.9	3.2	0	24	18.2	33.5
P06968	P06968	2	2	2	Deoxyuridine 5-triphosphate nucleotidohydrolase	dut	sp|P06968|DUT_ECOLI Deoxyuridine 5-triphosphate nucleotidohydrolase OS=Escherichia coli (strain K12) OX=83333 GN=dut PE=1 SV=2	1	2	2	2	1	2	2	2	2	2	1	2	2	2	2	2	1	2	2	2	2	2	19.7	19.7	19.7	16.286	152	152	0	27.605	By MS/MS	By MS/MS	By MS/MS	By MS/MS	By MS/MS	By MS/MS	7.9	19.7	19.7	19.7	19.7	19.7
P06971	P06971	19	19	19	Ferrichrome-iron receptor	fhuA	sp|P06971|FHUA_ECOLI Ferrichrome outer membrane transporter/phage receptor OS=Escherichia coli (strain K12) OX=83333 GN=fhuA PE=1 SV=2	1	19	19	19	15	11	9	15	16	13	15	11	9	15	16	13	15	11	9	15	16	13	33.7	33.7	33.7	82.181	747	747	0	86.107	By MS/MS	By MS/MS	By MS/MS	By MS/MS	By MS/MS	By MS/MS	26	20.9	14.9	25.8	29.5	21.6
P06983	P06983	8	8	8	Porphobilinogen deaminase	hemC	sp|P06983|HEM3_ECOLI Porphobilinogen deaminase OS=Escherichia coli (strain K12) OX=83333 GN=hemC PE=1 SV=2	1	8	8	8	1	6	2	2	4	3	1	6	2	2	4	3	1	6	2	2	4	3	41.5	41.5	41.5	33.851	313	313	0	47.045	By MS/MS	By MS/MS	By MS/MS	By MS/MS	By MS/MS	By MS/MS	3.5	31.6	11.8	11.8	23.6	17.3
P06987	P06987	6	6	6	Histidine biosynthesis bifunctional protein HisB;Histidinol-phosphatase;Imidazoleglycerol-phosphate dehydratase	hisB	sp|P06987|HIS7_ECOLI Histidine biosynthesis bifunctional protein HisB OS=Escherichia coli (strain K12) OX=83333 GN=hisB PE=1 SV=1	1	6	6	6	4	2	3	5	3	6	4	2	3	5	3	6	4	2	3	5	3	6	19.4	19.4	19.4	40.278	355	355	0	18.648	By matching	By matching	By matching	By MS/MS	By MS/MS	By MS/MS	11	4.8	8.5	14.9	8.5	19.4
P06992	P06992	5	5	5	Ribosomal RNA small subunit methyltransferase A	rsmA	sp|P06992|RSMA_ECOLI Ribosomal RNA small subunit methyltransferase A OS=Escherichia coli (strain K12) OX=83333 GN=rsmA PE=1 SV=1	1	5	5	5	2	2	1	5	5	4	2	2	1	5	5	4	2	2	1	5	5	4	27.1	27.1	27.1	30.42	273	273	0	57.302	By MS/MS	By MS/MS	By MS/MS	By MS/MS	By MS/MS	By MS/MS	7.3	7.3	4	27.1	27.1	23.4
P06993	P06993	16	16	16	HTH-type transcriptional regulator MalT	malT	sp|P06993|MALT_ECOLI HTH-type transcriptional regulator MalT OS=Escherichia coli (strain K12) OX=83333 GN=malT PE=1 SV=2	1	16	16	16	2	1	3	10	10	12	2	1	3	10	10	12	2	1	3	10	10	12	20.4	20.4	20.4	103.12	901	901	0	54.231	By matching	By MS/MS	By MS/MS	By MS/MS	By MS/MS	By MS/MS	3	1	4	12.2	13.9	13.8
P06996;P77747	P06996	16;1	16;1	15;1	Outer membrane protein C	ompC	sp|P06996|OMPC_ECOLI Outer membrane porin C OS=Escherichia coli (strain K12) OX=83333 GN=ompC PE=1 SV=1	2	16	16	15	12	10	9	12	12	14	12	10	9	12	12	14	11	9	8	11	12	13	50.4	50.4	47.1	40.368	367	367;377	0	146.9	By MS/MS	By MS/MS	By MS/MS	By MS/MS	By MS/MS	By MS/MS	33.5	31.1	28.3	33.5	36.8	47.7
P06999	P06999	8	8	8	ATP-dependent 6-phosphofructokinase isozyme 2	pfkB	sp|P06999|PFKB_ECOLI ATP-dependent 6-phosphofructokinase isozyme 2 OS=Escherichia coli (strain K12) OX=83333 GN=pfkB PE=1 SV=2	1	8	8	8	1	1	2	7	8	7	1	1	2	7	8	7	1	1	2	7	8	7	42.7	42.7	42.7	32.456	309	309	0	61.423	By matching	By matching	By matching	By MS/MS	By MS/MS	By MS/MS	2.6	3.2	8.4	37.2	42.7	34
P07001	P07001	14	14	14	NAD(P) transhydrogenase subunit alpha	pntA	sp|P07001|PNTA_ECOLI NAD(P) transhydrogenase subunit alpha OS=Escherichia coli (strain K12) OX=83333 GN=pntA PE=1 SV=2	1	14	14	14	5	4	3	9	11	13	5	4	3	9	11	13	5	4	3	9	11	13	43.1	43.1	43.1	54.623	510	510	0	136.64	By MS/MS	By MS/MS	By matching	By MS/MS	By MS/MS	By MS/MS	17.5	14.3	7.8	26.7	36.3	41
P07003	P07003	4	4	4	Pyruvate dehydrogenase [ubiquinone];Alpha-peptide	poxB	sp|P07003|POXB_ECOLI Pyruvate dehydrogenase [ubiquinone] OS=Escherichia coli (strain K12) OX=83333 GN=poxB PE=1 SV=1	1	4	4	4	1	1	0	3	2	4	1	1	0	3	2	4	1	1	0	3	2	4	7.5	7.5	7.5	62.011	572	572	0	6.7214	By matching	By matching		By MS/MS	By MS/MS	By MS/MS	2.8	1.4	0	5.8	3	7.5
P07004	P07004	10	10	10	Gamma-glutamyl phosphate reductase	proA	sp|P07004|PROA_ECOLI Gamma-glutamyl phosphate reductase OS=Escherichia coli (strain K12) OX=83333 GN=proA PE=1 SV=2	1	10	10	10	3	1	2	6	6	4	3	1	2	6	6	4	3	1	2	6	6	4	29.7	29.7	29.7	44.63	417	417	0	84.595	By MS/MS	By MS/MS	By matching	By MS/MS	By MS/MS	By MS/MS	11.5	1.9	5	22.1	18	12.9
P07012	P07012	12	12	12	Peptide chain release factor 2	prfB	sp|P07012|RF2_ECOLI Peptide chain release factor RF2 OS=Escherichia coli (strain K12) OX=83333 GN=prfB PE=1 SV=3	1	12	12	12	10	10	9	8	11	11	10	10	9	8	11	11	10	10	9	8	11	11	36.4	36.4	36.4	41.25	365	365	0	120.99	By MS/MS	By MS/MS	By MS/MS	By MS/MS	By MS/MS	By MS/MS	29	32.1	25.2	22.7	32.1	31.2
P07013	P07013	1	1	1	Primosomal replication protein n	priB	sp|P07013|PRIB_ECOLI Primosomal replication protein N OS=Escherichia coli (strain K12) OX=83333 GN=priB PE=1 SV=3	1	1	1	1	1	0	1	1	1	1	1	0	1	1	1	1	1	0	1	1	1	1	9.6	9.6	9.6	11.442	104	104	0.0054496	2.9906	By MS/MS		By matching	By MS/MS	By MS/MS	By matching	9.6	0	9.6	9.6	9.6	9.6
P07014	P07014	14	14	14	Succinate dehydrogenase iron-sulfur subunit	sdhB	sp|P07014|SDHB_ECOLI Succinate dehydrogenase iron-sulfur subunit OS=Escherichia coli (strain K12) OX=83333 GN=sdhB PE=1 SV=1	1	14	14	14	6	5	4	11	11	9	6	5	4	11	11	9	6	5	4	11	11	9	66	66	66	26.77	238	238	0	63.918	By MS/MS	By MS/MS	By MS/MS	By MS/MS	By MS/MS	By MS/MS	29	25.6	19.7	54.2	55.9	42
P07023	P07023	7	7	7	T-protein;Chorismate mutase;Prephenate dehydrogenase	tyrA	sp|P07023|TYRA_ECOLI T-protein OS=Escherichia coli (strain K12) OX=83333 GN=tyrA PE=1 SV=1	1	7	7	7	1	1	1	4	4	5	1	1	1	4	4	5	1	1	1	4	4	5	24.4	24.4	24.4	42.042	373	373	0	15.35	By MS/MS	By matching	By MS/MS	By MS/MS	By MS/MS	By MS/MS	2.1	2.1	2.1	9.7	17.2	15
P07117	P07117	2	2	2	Sodium/proline symporter	putP	sp|P07117|PUTP_ECOLI Sodium/proline symporter OS=Escherichia coli (strain K12) OX=83333 GN=putP PE=1 SV=1	1	2	2	2	0	0	1	1	1	2	0	0	1	1	1	2	0	0	1	1	1	2	3.8	3.8	3.8	54.344	502	502	0	4.8479			By MS/MS	By MS/MS	By MS/MS	By MS/MS	0	0	2	1.8	2	3.8
P07118	P07118	36	36	36	Valine--tRNA ligase	valS	sp|P07118|SYV_ECOLI Valine--tRNA ligase OS=Escherichia coli (strain K12) OX=83333 GN=valS PE=1 SV=2	1	36	36	36	20	21	15	29	30	28	20	21	15	29	30	28	20	21	15	29	30	28	49.7	49.7	49.7	108.19	951	951	0	323.31	By MS/MS	By MS/MS	By MS/MS	By MS/MS	By MS/MS	By MS/MS	25.8	26.8	20.5	40.8	43.1	39.6
P07330	P07330	2	2	2	Chemotaxis response regulator protein-glutamate methylesterase	cheB	sp|P07330|CHEB_ECOLI Protein-glutamate methylesterase/protein-glutamine glutaminase OS=Escherichia coli (strain K12) OX=83333 GN=cheB PE=1 SV=3	1	2	2	2	0	0	0	2	1	0	0	0	0	2	1	0	0	0	0	2	1	0	6	6	6	37.467	349	349	0.0072464	2.5329				By MS/MS	By MS/MS		0	0	0	6	2.3	0
P07395	P07395	33	33	33	Phenylalanine--tRNA ligase beta subunit	pheT	sp|P07395|SYFB_ECOLI Phenylalanine--tRNA ligase beta subunit OS=Escherichia coli (strain K12) OX=83333 GN=pheT PE=1 SV=2	1	33	33	33	22	16	21	31	29	31	22	16	21	31	29	31	22	16	21	31	29	31	57.6	57.6	57.6	87.377	795	795	0	323.31	By MS/MS	By MS/MS	By MS/MS	By MS/MS	By MS/MS	By MS/MS	35.8	28.6	36	53.1	51.2	54.3
P07604	P07604	17	17	17	Transcriptional regulatory protein TyrR	tyrR	sp|P07604|TYRR_ECOLI HTH-type transcriptional regulatory protein TyrR OS=Escherichia coli (strain K12) OX=83333 GN=tyrR PE=1 SV=2	1	17	17	17	3	1	2	10	13	13	3	1	2	10	13	13	3	1	2	10	13	13	39.4	39.4	39.4	57.655	513	513	0	107.7	By matching	By matching	By matching	By MS/MS	By MS/MS	By MS/MS	5.5	1.8	3.3	20.9	30.6	30.8
P07639	P07639	12	12	12	3-dehydroquinate synthase	aroB	sp|P07639|AROB_ECOLI 3-dehydroquinate synthase OS=Escherichia coli (strain K12) OX=83333 GN=aroB PE=1 SV=1	1	12	12	12	1	4	3	9	10	12	1	4	3	9	10	12	1	4	3	9	10	12	47.8	47.8	47.8	38.881	362	362	0	202.36	By matching	By matching	By matching	By MS/MS	By MS/MS	By MS/MS	2.5	13.8	11.3	35.1	41.2	47.8
P07650	P07650	27	27	27	Thymidine phosphorylase	deoA	sp|P07650|TYPH_ECOLI Thymidine phosphorylase OS=Escherichia coli (strain K12) OX=83333 GN=deoA PE=1 SV=3	1	27	27	27	7	5	8	26	25	25	7	5	8	26	25	25	7	5	8	26	25	25	75.9	75.9	75.9	47.207	440	440	0	323.31	By MS/MS	By MS/MS	By MS/MS	By MS/MS	By MS/MS	By MS/MS	22.3	15.2	21.4	68.9	68.9	70.2
P07762	P07762	11	11	11	1,4-alpha-glucan branching enzyme GlgB	glgB	sp|P07762|GLGB_ECOLI 1,4-alpha-glucan branching enzyme GlgB OS=Escherichia coli (strain K12) OX=83333 GN=glgB PE=1 SV=1	1	11	11	11	5	10	10	3	7	6	5	10	10	3	7	6	5	10	10	3	7	6	18.7	18.7	18.7	84.336	728	728	0	84.204	By MS/MS	By MS/MS	By MS/MS	By MS/MS	By MS/MS	By MS/MS	9.5	17	16.1	6.9	11.5	9.5
P07813	P07813	36	36	36	Leucine--tRNA ligase	leuS	sp|P07813|SYL_ECOLI Leucine--tRNA ligase OS=Escherichia coli (strain K12) OX=83333 GN=leuS PE=1 SV=2	1	36	36	36	22	20	19	30	33	32	22	20	19	30	33	32	22	20	19	30	33	32	58.1	58.1	58.1	97.233	860	860	0	323.31	By MS/MS	By MS/MS	By MS/MS	By MS/MS	By MS/MS	By MS/MS	33.7	31.3	29	48.6	50.3	50.2
P07821	P07821	1	1	1	Iron(3+)-hydroxamate import ATP-binding protein FhuC	fhuC	sp|P07821|FHUC_ECOLI Iron(3+)-hydroxamate import ATP-binding protein FhuC OS=Escherichia coli (strain K12) OX=83333 GN=fhuC PE=1 SV=3	1	1	1	1	1	0	0	0	0	0	1	0	0	0	0	0	1	0	0	0	0	0	3.8	3.8	3.8	28.886	265	265	0.0066007	2.5557	By MS/MS						3.8	0	0	0	0	0
P07862	P07862	14	14	14	D-alanine--D-alanine ligase B	ddlB	sp|P07862|DDLB_ECOLI D-alanine--D-alanine ligase B OS=Escherichia coli (strain K12) OX=83333 GN=ddlB PE=1 SV=3	1	14	14	14	4	3	1	14	12	13	4	3	1	14	12	13	4	3	1	14	12	13	64.7	64.7	64.7	32.839	306	306	0	204.6	By matching	By MS/MS	By matching	By MS/MS	By MS/MS	By MS/MS	24.2	11.4	4.2	64.7	57.8	62.1
P07913	P07913	8	8	8	L-threonine 3-dehydrogenase	tdh	sp|P07913|TDH_ECOLI L-threonine 3-dehydrogenase OS=Escherichia coli (strain K12) OX=83333 GN=tdh PE=1 SV=1	1	8	8	8	3	3	3	6	5	8	3	3	3	6	5	8	3	3	3	6	5	8	36.4	36.4	36.4	37.239	341	341	0	49.654	By MS/MS	By MS/MS	By MS/MS	By MS/MS	By MS/MS	By MS/MS	10.9	15.5	10.9	24	20.2	36.4
P08142	P08142	6	6	6	Acetolactate synthase isozyme 1 large subunit	ilvB	sp|P08142|ILVB_ECOLI Acetolactate synthase isozyme 1 large subunit OS=Escherichia coli (strain K12) OX=83333 GN=ilvB PE=1 SV=1	1	6	6	6	0	0	0	4	3	6	0	0	0	4	3	6	0	0	0	4	3	6	13	13	13	60.44	562	562	0	60.741				By MS/MS	By MS/MS	By MS/MS	0	0	0	9.8	8	13
P08178	P08178	9	9	9	Phosphoribosylformylglycinamidine cyclo-ligase	purM	sp|P08178|PUR5_ECOLI Phosphoribosylformylglycinamidine cyclo-ligase OS=Escherichia coli (strain K12) OX=83333 GN=purM PE=1 SV=3	1	9	9	9	1	0	0	7	6	7	1	0	0	7	6	7	1	0	0	7	6	7	42	42	42	36.854	345	345	0	156.52	By matching			By MS/MS	By MS/MS	By MS/MS	2.3	0	0	29.9	29.3	36.2
P08179	P08179	4	4	4	Phosphoribosylglycinamide formyltransferase	purN	sp|P08179|PUR3_ECOLI Phosphoribosylglycinamide formyltransferase OS=Escherichia coli (strain K12) OX=83333 GN=purN PE=1 SV=1	1	4	4	4	1	0	0	2	2	2	1	0	0	2	2	2	1	0	0	2	2	2	22.2	22.2	22.2	23.238	212	212	0	8.8648	By MS/MS			By MS/MS	By MS/MS	By MS/MS	6.1	0	0	9	10.8	10.8
P08192	P08192	16	16	16	Bifunctional protein FolC;Folylpolyglutamate synthase;Dihydrofolate synthase	folC	sp|P08192|FOLC_ECOLI Dihydrofolate synthase/folylpolyglutamate synthase OS=Escherichia coli (strain K12) OX=83333 GN=folC PE=1 SV=2	1	16	16	16	2	4	2	11	15	13	2	4	2	11	15	13	2	4	2	11	15	13	51.7	51.7	51.7	45.405	422	422	0	130.09	By matching	By matching	By matching	By MS/MS	By MS/MS	By MS/MS	5.5	15.4	8.1	39.6	48.1	41.9
P08194	P08194	13	13	13	Glycerol-3-phosphate transporter	glpT	sp|P08194|GLPT_ECOLI Glycerol-3-phosphate transporter OS=Escherichia coli (strain K12) OX=83333 GN=glpT PE=1 SV=1	1	13	13	13	9	9	8	11	13	10	9	9	8	11	13	10	9	9	8	11	13	10	29.2	29.2	29.2	50.31	452	452	0	184.03	By MS/MS	By MS/MS	By MS/MS	By MS/MS	By MS/MS	By MS/MS	24.3	22.8	20.4	25	29.2	26.3
P08200	P08200	23	23	23	Isocitrate dehydrogenase [NADP]	icd	sp|P08200|IDH_ECOLI Isocitrate dehydrogenase [NADP] OS=Escherichia coli (strain K12) OX=83333 GN=icd PE=1 SV=1	1	23	23	23	13	16	15	22	22	19	13	16	15	22	22	19	13	16	15	22	22	19	63.7	63.7	63.7	45.756	416	416	0	323.31	By MS/MS	By MS/MS	By MS/MS	By MS/MS	By MS/MS	By MS/MS	34.4	41.6	41.6	60.6	63.2	58.4
P08201	P08201	27	27	27	Nitrite reductase (NADH) large subunit	nirB	sp|P08201|NIRB_ECOLI Nitrite reductase (NADH) large subunit OS=Escherichia coli (strain K12) OX=83333 GN=nirB PE=3 SV=4	1	27	27	27	16	11	12	22	22	20	16	11	12	22	22	20	16	11	12	22	22	20	39.6	39.6	39.6	93.12	847	847	0	185.95	By MS/MS	By MS/MS	By MS/MS	By MS/MS	By MS/MS	By MS/MS	23	15.7	15.1	31.8	32.1	28.7
P08244	P08244	8	8	8	Orotidine 5-phosphate decarboxylase	pyrF	sp|P08244|PYRF_ECOLI Orotidine 5-phosphate decarboxylase OS=Escherichia coli (strain K12) OX=83333 GN=pyrF PE=1 SV=1	1	8	8	8	4	1	0	4	6	4	4	1	0	4	6	4	4	1	0	4	6	4	37.1	37.1	37.1	26.35	245	245	0	32.594	By matching	By matching		By MS/MS	By MS/MS	By MS/MS	18.4	3.3	0	18.8	28.6	20
P08312	P08312	15	15	15	Phenylalanine--tRNA ligase alpha subunit	pheS	sp|P08312|SYFA_ECOLI Phenylalanine--tRNA ligase alpha subunit OS=Escherichia coli (strain K12) OX=83333 GN=pheS PE=1 SV=2	1	15	15	15	9	9	10	12	13	11	9	9	10	12	13	11	9	9	10	12	13	11	53.5	53.5	53.5	36.831	327	327	0	99.864	By MS/MS	By MS/MS	By MS/MS	By MS/MS	By MS/MS	By MS/MS	30.6	32.7	35.8	41.6	48	37.9
P08331	P08331	3	3	3	2,3-cyclic-nucleotide 2-phosphodiesterase/3-nucleotidase	cpdB	sp|P08331|CPDB_ECOLI 2,3-cyclic-nucleotide 2-phosphodiesterase/3-nucleotidase OS=Escherichia coli (strain K12) OX=83333 GN=cpdB PE=1 SV=2	1	3	3	3	1	1	1	1	2	1	1	1	1	1	2	1	1	1	1	1	2	1	4.5	4.5	4.5	70.831	647	647	0	5.7957	By MS/MS	By MS/MS	By matching	By MS/MS	By MS/MS	By matching	1.2	1.2	1.9	1.9	3.2	1.4
P08337	P08337	4	4	4	8-oxo-dGTP diphosphatase	mutT	sp|P08337|MUTT_ECOLI 8-oxo-dGTP diphosphatase OS=Escherichia coli (strain K12) OX=83333 GN=mutT PE=1 SV=1	1	4	4	4	1	0	0	3	3	2	1	0	0	3	3	2	1	0	0	3	3	2	34.9	34.9	34.9	14.927	129	129	0	11.542	By matching			By MS/MS	By MS/MS	By MS/MS	7.8	0	0	27.1	27.9	14
P08373	P08373	4	4	4	UDP-N-acetylenolpyruvoylglucosamine reductase	murB	sp|P08373|MURB_ECOLI UDP-N-acetylenolpyruvoylglucosamine reductase OS=Escherichia coli (strain K12) OX=83333 GN=murB PE=1 SV=1	1	4	4	4	1	1	1	2	4	1	1	1	1	2	4	1	1	1	1	2	4	1	12.6	12.6	12.6	37.851	342	342	0	8.8666	By MS/MS	By matching	By matching	By MS/MS	By MS/MS	By matching	2.9	2.9	4.1	7	12.6	4.1
P08390	P08390	2	2	2	USG-1 protein	usg	sp|P08390|USG_ECOLI USG-1 protein OS=Escherichia coli (strain K12) OX=83333 GN=usg PE=1 SV=1	1	2	2	2	1	0	1	1	2	1	1	0	1	1	2	1	1	0	1	1	2	1	13.9	13.9	13.9	36.364	337	337	0	5.8041	By MS/MS		By matching	By MS/MS	By MS/MS	By MS/MS	3.3	0	3.3	3.3	13.9	3.3
P08395	P08395	8	8	8	Protease 4	sppA	sp|P08395|SPPA_ECOLI Protease 4 OS=Escherichia coli (strain K12) OX=83333 GN=sppA PE=1 SV=2	1	8	8	8	1	1	3	6	6	7	1	1	3	6	6	7	1	1	3	6	6	7	18.3	18.3	18.3	67.219	618	618	0	39.812	By matching	By matching	By matching	By MS/MS	By MS/MS	By MS/MS	1.5	2.3	7.3	14.4	14.4	16.7
P08506	P08506	2	2	2	D-alanyl-D-alanine carboxypeptidase DacC	dacC	sp|P08506|DACC_ECOLI D-alanyl-D-alanine carboxypeptidase DacC OS=Escherichia coli (strain K12) OX=83333 GN=dacC PE=1 SV=2	1	2	2	2	0	0	0	0	1	1	0	0	0	0	1	1	0	0	0	0	1	1	6	6	6	43.608	400	400	0.0027797	3.2407					By MS/MS	By MS/MS	0	0	0	0	3.8	2.2
P08622	P08622	16	16	16	Chaperone protein DnaJ	dnaJ	sp|P08622|DNAJ_ECOLI Chaperone protein DnaJ OS=Escherichia coli (strain K12) OX=83333 GN=dnaJ PE=1 SV=3	1	16	16	16	6	7	7	10	13	12	6	7	7	10	13	12	6	7	7	10	13	12	59.3	59.3	59.3	41.1	376	376	0	153.38	By MS/MS	By MS/MS	By MS/MS	By MS/MS	By MS/MS	By MS/MS	16.2	22.6	20.7	27.1	46.8	43.9
P08660	P08660	2	2	2	Lysine-sensitive aspartokinase 3	lysC	sp|P08660|AK3_ECOLI Lysine-sensitive aspartokinase 3 OS=Escherichia coli (strain K12) OX=83333 GN=lysC PE=1 SV=2	1	2	2	2	0	0	0	0	1	2	0	0	0	0	1	2	0	0	0	0	1	2	6.5	6.5	6.5	48.531	449	449	0	5.0653					By MS/MS	By MS/MS	0	0	0	0	2.7	6.5
P08839;P77439	P08839	27;1	27;1	26;0	Phosphoenolpyruvate-protein phosphotransferase	ptsI	sp|P08839|PT1_ECOLI Phosphoenolpyruvate-protein phosphotransferase OS=Escherichia coli (strain K12) OX=83333 GN=ptsI PE=1 SV=1	2	27	27	26	18	20	20	26	26	26	18	20	20	26	26	26	18	20	20	26	25	25	67	67	65.6	63.561	575	575;831	0	323.31	By MS/MS	By MS/MS	By MS/MS	By MS/MS	By MS/MS	By MS/MS	41.7	42.4	44	65.6	65.6	63.1
P08956	P08956	15	15	15	Type I restriction enzyme EcoKI R protein	hsdR	sp|P08956|T1RK_ECOLI Type I restriction enzyme EcoKI endonuclease subunit OS=Escherichia coli (strain K12) OX=83333 GN=hsdR PE=1 SV=3	1	15	15	15	2	2	2	7	11	8	2	2	2	7	11	8	2	2	2	7	11	8	13.7	13.7	13.7	134.09	1170	1170	0	41.231	By matching	By matching	By matching	By MS/MS	By MS/MS	By MS/MS	1.4	1.5	1.4	6.3	9.8	6.8
P08957	P08957	23	23	23	Type I restriction enzyme EcoKI M protein	hsdM	sp|P08957|T1MK_ECOLI Type I restriction enzyme EcoKI methylase subunit OS=Escherichia coli (strain K12) OX=83333 GN=hsdM PE=1 SV=1	1	23	23	23	9	6	5	16	17	16	9	6	5	16	17	16	9	6	5	16	17	16	56.3	56.3	56.3	59.306	529	529	0	129.45	By MS/MS	By MS/MS	By matching	By MS/MS	By MS/MS	By MS/MS	21.7	14.2	13.4	40.1	45	38.2
P08997	P08997	21	21	21	Malate synthase A	aceB	sp|P08997|MASY_ECOLI Malate synthase A OS=Escherichia coli (strain K12) OX=83333 GN=aceB PE=1 SV=1	1	21	21	21	7	3	8	19	18	17	7	3	8	19	18	17	7	3	8	19	18	17	57.4	57.4	57.4	60.273	533	533	0	323.31	By MS/MS	By MS/MS	By MS/MS	By MS/MS	By MS/MS	By MS/MS	15.9	7.5	16.9	53.3	46.5	45
P09030	P09030	5	5	5	Exodeoxyribonuclease III	xthA	sp|P09030|EX3_ECOLI Exodeoxyribonuclease III OS=Escherichia coli (strain K12) OX=83333 GN=xthA PE=1 SV=4	1	5	5	5	2	2	2	3	2	3	2	2	2	3	2	3	2	2	2	3	2	3	19	19	19	30.969	268	268	0	15.653	By MS/MS	By MS/MS	By MS/MS	By MS/MS	By MS/MS	By MS/MS	7.8	6.3	6.7	10.1	6.7	11.6
P09053	P09053	11	11	11	Valine--pyruvate aminotransferase	avtA	sp|P09053|AVTA_ECOLI Valine--pyruvate aminotransferase OS=Escherichia coli (strain K12) OX=83333 GN=avtA PE=1 SV=3	1	11	11	11	1	2	3	7	9	10	1	2	3	7	9	10	1	2	3	7	9	10	34.5	34.5	34.5	46.711	417	417	0	125.23	By matching	By MS/MS	By matching	By MS/MS	By MS/MS	By MS/MS	2.2	4.1	8.4	20.9	24.2	32.6
P09127	P09127	3	3	3	Putative uroporphyrinogen-III C-methyltransferase	hemX	sp|P09127|HEMX_ECOLI Protein HemX OS=Escherichia coli (strain K12) OX=83333 GN=hemX PE=1 SV=1	1	3	3	3	1	1	0	3	3	3	1	1	0	3	3	3	1	1	0	3	3	3	8.9	8.9	8.9	42.962	393	393	0	9.4752	By matching	By matching		By MS/MS	By MS/MS	By MS/MS	3.1	2.3	0	8.9	8.9	8.9
P09147	P09147	8	8	8	UDP-glucose 4-epimerase	galE	sp|P09147|GALE_ECOLI UDP-glucose 4-epimerase OS=Escherichia coli (strain K12) OX=83333 GN=galE PE=1 SV=1	1	8	8	8	2	6	4	3	8	5	2	6	4	3	8	5	2	6	4	3	8	5	34.9	34.9	34.9	37.265	338	338	0	80.439	By MS/MS	By MS/MS	By MS/MS	By MS/MS	By MS/MS	By MS/MS	8	26	17.5	14.5	34.9	23.4
P09148	P09148	5	5	5	Galactose-1-phosphate uridylyltransferase	galT	sp|P09148|GAL7_ECOLI Galactose-1-phosphate uridylyltransferase OS=Escherichia coli (strain K12) OX=83333 GN=galT PE=1 SV=2	1	5	5	5	2	2	2	3	3	3	2	2	2	3	3	3	2	2	2	3	3	3	14.4	14.4	14.4	39.645	348	348	0	11.573	By MS/MS	By MS/MS	By matching	By MS/MS	By MS/MS	By MS/MS	5.2	5.5	6	8.3	9.5	8.3
P09152;P19319	P09152	43;6	43;6	43;6	Respiratory nitrate reductase 1 alpha chain	narG	sp|P09152|NARG_ECOLI Respiratory nitrate reductase 1 alpha chain OS=Escherichia coli (strain K12) OX=83333 GN=narG PE=1 SV=4	2	43	43	43	19	21	18	28	34	33	19	21	18	28	34	33	19	21	18	28	34	33	48.8	48.8	48.8	140.49	1247	1247;1246	0	323.31	By MS/MS	By MS/MS	By MS/MS	By MS/MS	By MS/MS	By MS/MS	19.1	25.9	22.5	32.5	40.6	40
P09155	P09155	10	10	10	Ribonuclease D	rnd	sp|P09155|RND_ECOLI Ribonuclease D OS=Escherichia coli (strain K12) OX=83333 GN=rnd PE=1 SV=1	1	10	10	10	0	0	0	7	7	8	0	0	0	7	7	8	0	0	0	7	7	8	38.9	38.9	38.9	42.734	375	375	0	46.043				By MS/MS	By MS/MS	By MS/MS	0	0	0	25.9	25.6	30.1
P09158	P09158	6	6	6	Polyamine aminopropyltransferase	speE	sp|P09158|SPEE_ECOLI Polyamine aminopropyltransferase OS=Escherichia coli (strain K12) OX=83333 GN=speE PE=1 SV=2	1	6	6	6	1	1	2	4	4	4	1	1	2	4	4	4	1	1	2	4	4	4	33	33	33	32.321	288	288	0	30.183	By MS/MS	By matching	By matching	By MS/MS	By MS/MS	By MS/MS	3.5	5.2	10.8	19.1	20.1	24.7
P09169	P09169	14	14	14	Protease 7	ompT	sp|P09169|OMPT_ECOLI Protease 7 OS=Escherichia coli (strain K12) OX=83333 GN=ompT PE=1 SV=1	1	14	14	14	10	8	9	8	12	10	10	8	9	8	12	10	10	8	9	8	12	10	58	58	58	35.562	317	317	0	110.79	By MS/MS	By MS/MS	By MS/MS	By MS/MS	By MS/MS	By MS/MS	38.5	26.8	35.6	31.5	50.5	40.1
P09323	P09323	11	11	11	PTS system N-acetylglucosamine-specific EIICBA component;N-acetylglucosamine permease IIC component;N-acetylglucosamine-specific phosphotransferase enzyme IIB component;N-acetylglucosamine-specific phosphotransferase enzyme IIA component	nagE	sp|P09323|PTW3C_ECOLI PTS system N-acetylglucosamine-specific EIICBA component OS=Escherichia coli (strain K12) OX=83333 GN=nagE PE=1 SV=1	1	11	11	11	6	7	6	7	8	8	6	7	6	7	8	8	6	7	6	7	8	8	22.5	22.5	22.5	68.346	648	648	0	82.526	By MS/MS	By MS/MS	By MS/MS	By MS/MS	By MS/MS	By MS/MS	12	14.4	11.4	15.1	17.1	14.5
P09372	P09372	8	8	8	Protein GrpE	grpE	sp|P09372|GRPE_ECOLI Protein GrpE OS=Escherichia coli (strain K12) OX=83333 GN=grpE PE=1 SV=1	1	8	8	8	3	5	4	8	6	6	3	5	4	8	6	6	3	5	4	8	6	6	53.8	53.8	53.8	21.798	197	197	0	82.257	By MS/MS	By MS/MS	By MS/MS	By MS/MS	By MS/MS	By MS/MS	17.8	29.9	21.3	53.8	46.7	46.7
P09373	P09373	42	42	38	Formate acetyltransferase 1	pflB	sp|P09373|PFLB_ECOLI Formate acetyltransferase 1 OS=Escherichia coli (strain K12) OX=83333 GN=pflB PE=1 SV=2	1	42	42	38	29	28	32	41	41	39	29	28	32	41	41	39	26	25	28	37	37	35	76.4	76.4	72.2	85.356	760	760	0	323.31	By MS/MS	By MS/MS	By MS/MS	By MS/MS	By MS/MS	By MS/MS	48.6	49.9	52.6	76.4	76.4	72.6
P09394	P09394	17	17	17	Glycerophosphoryl diester phosphodiesterase	glpQ	sp|P09394|GLPQ_ECOLI Glycerophosphodiester phosphodiesterase, periplasmic OS=Escherichia coli (strain K12) OX=83333 GN=glpQ PE=1 SV=2	1	17	17	17	12	11	12	12	13	14	12	11	12	12	13	14	12	11	12	12	13	14	61.7	61.7	61.7	40.843	358	358	0	159.07	By MS/MS	By MS/MS	By MS/MS	By MS/MS	By MS/MS	By MS/MS	38.5	43.6	47.5	37.2	50	50.8
P09424	P09424	11	11	11	Mannitol-1-phosphate 5-dehydrogenase	mtlD	sp|P09424|MTLD_ECOLI Mannitol-1-phosphate 5-dehydrogenase OS=Escherichia coli (strain K12) OX=83333 GN=mtlD PE=1 SV=3	1	11	11	11	0	0	1	8	10	7	0	0	1	8	10	7	0	0	1	8	10	7	46.9	46.9	46.9	41.139	382	382	0	140.89			By matching	By MS/MS	By MS/MS	By MS/MS	0	0	4.5	33	43.7	31.2
P09546	P09546	35	35	35	Bifunctional protein PutA;Proline dehydrogenase;Delta-1-pyrroline-5-carboxylate dehydrogenase	putA	sp|P09546|PUTA_ECOLI Bifunctional protein PutA OS=Escherichia coli (strain K12) OX=83333 GN=putA PE=1 SV=3	1	35	35	35	11	11	7	21	27	22	11	11	7	21	27	22	11	11	7	21	27	22	38	38	38	143.81	1320	1320	0	172.58	By MS/MS	By MS/MS	By MS/MS	By MS/MS	By MS/MS	By MS/MS	11.2	11.3	6.7	22.6	30.8	24
P09549	P09549	1	1	1	Cell division protein DedD	dedD	sp|P09549|DEDD_ECOLI Cell division protein DedD OS=Escherichia coli (strain K12) OX=83333 GN=dedD PE=3 SV=2	1	1	1	1	1	0	0	1	1	1	1	0	0	1	1	1	1	0	0	1	1	1	4.5	4.5	4.5	22.938	220	220	0.0054127	2.9242	By MS/MS			By MS/MS	By MS/MS	By MS/MS	4.5	0	0	4.5	4.5	4.5
P09831	P09831	9	9	9	Glutamate synthase [NADPH] large chain	gltB	sp|P09831|GLTB_ECOLI Glutamate synthase [NADPH] large chain OS=Escherichia coli (strain K12) OX=83333 GN=gltB PE=1 SV=3	1	9	9	9	1	0	1	3	8	5	1	0	1	3	8	5	1	0	1	3	8	5	8.1	8.1	8.1	163.3	1486	1486	0	30.152	By matching		By matching	By MS/MS	By MS/MS	By MS/MS	0.5	0	0.5	2.4	7.5	4.3
P09832	P09832	3	3	3	Glutamate synthase [NADPH] small chain	gltD	sp|P09832|GLTD_ECOLI Glutamate synthase [NADPH] small chain OS=Escherichia coli (strain K12) OX=83333 GN=gltD PE=1 SV=3	1	3	3	3	1	1	1	2	3	2	1	1	1	2	3	2	1	1	1	2	3	2	8.7	8.7	8.7	52.015	472	472	0	10.622	By matching	By matching	By matching	By MS/MS	By MS/MS	By MS/MS	1.9	1.9	1.9	5.5	8.7	5.5
P09980	P09980	5	5	5	ATP-dependent DNA helicase Rep	rep	sp|P09980|REP_ECOLI ATP-dependent DNA helicase Rep OS=Escherichia coli (strain K12) OX=83333 GN=rep PE=1 SV=3	1	5	5	5	1	0	0	1	4	2	1	0	0	1	4	2	1	0	0	1	4	2	9.1	9.1	9.1	77.023	673	673	0	11.827	By MS/MS			By MS/MS	By MS/MS	By MS/MS	2.1	0	0	1.9	7	3.6
P0A698	P0A698	15	15	15	UvrABC system protein A	uvrA	sp|P0A698|UVRA_ECOLI UvrABC system protein A OS=Escherichia coli (strain K12) OX=83333 GN=uvrA PE=1 SV=1	1	15	15	15	6	1	2	9	8	7	6	1	2	9	8	7	6	1	2	9	8	7	20.5	20.5	20.5	103.87	940	940	0	56.495	By matching	By matching	By matching	By MS/MS	By MS/MS	By MS/MS	7.6	1.3	2.7	12.7	10.1	10.4
P0A6A0	P0A6A0	25	25	25	Probable protein kinase UbiB	ubiB	sp|P0A6A0|UBIB_ECOLI Probable protein kinase UbiB OS=Escherichia coli (strain K12) OX=83333 GN=ubiB PE=1 SV=1	1	25	25	25	7	3	5	19	22	22	7	3	5	19	22	22	7	3	5	19	22	22	59	59	59	63.202	546	546	0	203.35	By MS/MS	By matching	By matching	By MS/MS	By MS/MS	By MS/MS	12.8	6.6	9.5	38.8	53.5	51.3
P0A6A3	P0A6A3	21	21	21	Acetate kinase	ackA	sp|P0A6A3|ACKA_ECOLI Acetate kinase OS=Escherichia coli (strain K12) OX=83333 GN=ackA PE=1 SV=1	1	21	21	21	18	14	16	18	20	19	18	14	16	18	20	19	18	14	16	18	20	19	82.2	82.2	82.2	43.29	400	400	0	323.31	By MS/MS	By MS/MS	By MS/MS	By MS/MS	By MS/MS	By MS/MS	75	54.8	68.8	75	82.2	75
P0A6A6	P0A6A6	2	2	2	3-isopropylmalate dehydratase large subunit	leuC	sp|P0A6A6|LEUC_ECOLI 3-isopropylmalate dehydratase large subunit OS=Escherichia coli (strain K12) OX=83333 GN=leuC PE=1 SV=2	1	2	2	2	0	0	0	1	1	1	0	0	0	1	1	1	0	0	0	1	1	1	5.6	5.6	5.6	49.881	466	466	0	5.3887				By MS/MS	By MS/MS	By matching	0	0	0	1.9	3.6	1.9
P0A6A8	P0A6A8	2	2	2	Acyl carrier protein	acpP	sp|P0A6A8|ACP_ECOLI Acyl carrier protein OS=Escherichia coli (strain K12) OX=83333 GN=acpP PE=1 SV=2	1	2	2	2	2	2	2	2	2	2	2	2	2	2	2	2	2	2	2	2	2	2	32.1	32.1	32.1	8.6394	78	78	0	87.29	By MS/MS	By MS/MS	By MS/MS	By MS/MS	By MS/MS	By MS/MS	32.1	32.1	32.1	32.1	32.1	32.1
P0A6B7	P0A6B7	18	18	18	Cysteine desulfurase IscS	iscS	sp|P0A6B7|ISCS_ECOLI Cysteine desulfurase IscS OS=Escherichia coli (strain K12) OX=83333 GN=iscS PE=1 SV=1	1	18	18	18	13	16	11	15	17	17	13	16	11	15	17	17	13	16	11	15	17	17	53.5	53.5	53.5	45.089	404	404	0	192.21	By MS/MS	By MS/MS	By MS/MS	By MS/MS	By MS/MS	By MS/MS	40.1	47.5	32.2	44.8	50.2	49.8
P0A6D0	P0A6D0	1	1	1	Arginine repressor	argR	sp|P0A6D0|ARGR_ECOLI Arginine repressor OS=Escherichia coli (strain K12) OX=83333 GN=argR PE=1 SV=1	1	1	1	1	0	0	0	1	1	1	0	0	0	1	1	1	0	0	0	1	1	1	16	16	16	16.994	156	156	0	25.758				By MS/MS	By MS/MS	By MS/MS	0	0	0	16	16	16
P0A6D3	P0A6D3	4	4	4	3-phosphoshikimate 1-carboxyvinyltransferase	aroA	sp|P0A6D3|AROA_ECOLI 3-phosphoshikimate 1-carboxyvinyltransferase OS=Escherichia coli (strain K12) OX=83333 GN=aroA PE=1 SV=1	1	4	4	4	1	0	0	1	2	3	1	0	0	1	2	3	1	0	0	1	2	3	11.2	11.2	11.2	46.095	427	427	0	12.057	By matching			By matching	By MS/MS	By MS/MS	3	0	0	3	5.6	8.2
P0A6D7	P0A6D7	9	9	9	Shikimate kinase 1	aroK	sp|P0A6D7|AROK_ECOLI Shikimate kinase 1 OS=Escherichia coli (strain K12) OX=83333 GN=aroK PE=1 SV=2	1	9	9	9	4	0	5	8	7	9	4	0	5	8	7	9	4	0	5	8	7	9	64.2	64.2	64.2	19.538	173	173	0	75.92	By MS/MS		By matching	By MS/MS	By MS/MS	By MS/MS	25.4	0	31.8	53.2	49.7	64.2
P0A6E4	P0A6E4	5	5	5	Argininosuccinate synthase	argG	sp|P0A6E4|ASSY_ECOLI Argininosuccinate synthase OS=Escherichia coli (strain K12) OX=83333 GN=argG PE=1 SV=2	1	5	5	5	1	1	1	2	3	3	1	1	1	2	3	3	1	1	1	2	3	3	14.3	14.3	14.3	49.898	447	447	0	12.272	By matching	By MS/MS	By matching	By MS/MS	By MS/MS	By MS/MS	2	2	2	4.3	6.5	9.8
P0A6E6	P0A6E6	3	3	3	ATP synthase epsilon chain	atpC	sp|P0A6E6|ATPE_ECOLI ATP synthase epsilon chain OS=Escherichia coli (strain K12) OX=83333 GN=atpC PE=1 SV=2	1	3	3	3	1	1	1	2	2	2	1	1	1	2	2	2	1	1	1	2	2	2	37.4	37.4	37.4	15.068	139	139	0	23.607	By MS/MS	By MS/MS	By MS/MS	By MS/MS	By MS/MS	By MS/MS	17.3	17.3	17.3	33.8	20.9	33.8
P0A6F1	P0A6F1	3	3	3	Carbamoyl-phosphate synthase small chain	carA	sp|P0A6F1|CARA_ECOLI Carbamoyl-phosphate synthase small chain OS=Escherichia coli (strain K12) OX=83333 GN=carA PE=1 SV=1	1	3	3	3	0	0	0	2	1	2	0	0	0	2	1	2	0	0	0	2	1	2	9.7	9.7	9.7	41.431	382	382	0	7.3213				By MS/MS	By MS/MS	By MS/MS	0	0	0	7.1	2.6	5.8
P0A6F3	P0A6F3	32	32	32	Glycerol kinase	glpK	sp|P0A6F3|GLPK_ECOLI Glycerol kinase OS=Escherichia coli (strain K12) OX=83333 GN=glpK PE=1 SV=2	1	32	32	32	26	24	23	30	31	29	26	24	23	30	31	29	26	24	23	30	31	29	78.5	78.5	78.5	56.23	502	502	0	323.31	By MS/MS	By MS/MS	By MS/MS	By MS/MS	By MS/MS	By MS/MS	60.2	60.2	57.6	73.3	73.1	70.7
P0A6F5	P0A6F5	28	28	28	60 kDa chaperonin	groL	sp|P0A6F5|CH60_ECOLI Chaperonin GroEL OS=Escherichia coli (strain K12) OX=83333 GN=groEL PE=1 SV=2	1	28	28	28	25	24	25	27	28	27	25	24	25	27	28	27	25	24	25	27	28	27	74.1	74.1	74.1	57.328	548	548	0	323.31	By MS/MS	By MS/MS	By MS/MS	By MS/MS	By MS/MS	By MS/MS	68.1	62	65.1	73.9	74.1	73.9
P0A6F9	P0A6F9	4	4	4	10 kDa chaperonin	groS	sp|P0A6F9|CH10_ECOLI Co-chaperonin GroES OS=Escherichia coli (strain K12) OX=83333 GN=groES PE=1 SV=1	1	4	4	4	4	4	4	4	4	4	4	4	4	4	4	4	4	4	4	4	4	4	52.6	52.6	52.6	10.387	97	97	0	26.888	By MS/MS	By MS/MS	By MS/MS	By MS/MS	By MS/MS	By MS/MS	52.6	52.6	52.6	52.6	52.6	52.6
P0A6G3	P0A6G3	2	2	2	Nicotinamide-nucleotide amidohydrolase PncC	pncC	sp|P0A6G3|PNCC_ECOLI Nicotinamide-nucleotide amidohydrolase PncC OS=Escherichia coli (strain K12) OX=83333 GN=pncC PE=1 SV=1	1	2	2	2	1	1	1	1	1	0	1	1	1	1	1	0	1	1	1	1	1	0	14.5	14.5	14.5	17.582	165	165	0	7.4094	By matching	By MS/MS	By matching	By MS/MS	By MS/MS		6.1	8.5	6.1	6.1	6.1	0
P0A6G7	P0A6G7	3	3	3	ATP-dependent Clp protease proteolytic subunit	clpP	sp|P0A6G7|CLPP_ECOLI ATP-dependent Clp protease proteolytic subunit OS=Escherichia coli (strain K12) OX=83333 GN=clpP PE=1 SV=1	1	3	3	3	3	2	3	3	3	3	3	2	3	3	3	3	3	2	3	3	3	3	29	29	29	23.186	207	207	0	115.45	By MS/MS	By matching	By MS/MS	By MS/MS	By MS/MS	By MS/MS	29	20.3	29	29	29	29
P0A6H1	P0A6H1	22	22	22	ATP-dependent Clp protease ATP-binding subunit ClpX	clpX	sp|P0A6H1|CLPX_ECOLI ATP-dependent Clp protease ATP-binding subunit ClpX OS=Escherichia coli (strain K12) OX=83333 GN=clpX PE=1 SV=2	1	22	22	22	12	11	13	16	22	19	12	11	13	16	22	19	12	11	13	16	22	19	71	71	71	46.355	424	424	0	323.31	By MS/MS	By MS/MS	By MS/MS	By MS/MS	By MS/MS	By MS/MS	37.5	31.8	39.9	48.6	71	60.6
P0A6H5	P0A6H5	24	24	24	ATP-dependent protease ATPase subunit HslU	hslU	sp|P0A6H5|HSLU_ECOLI ATP-dependent protease ATPase subunit HslU OS=Escherichia coli (strain K12) OX=83333 GN=hslU PE=1 SV=1	1	24	24	24	15	10	17	24	22	22	15	10	17	24	22	22	15	10	17	24	22	22	56.7	56.7	56.7	49.593	443	443	0	262.64	By MS/MS	By MS/MS	By MS/MS	By MS/MS	By MS/MS	By MS/MS	36.3	24.6	41.5	56.7	53.3	52.4
P0A6H8	P0A6H8	6	6	6	Cardiolipin synthase A	clsA	sp|P0A6H8|CLSA_ECOLI Cardiolipin synthase A OS=Escherichia coli (strain K12) OX=83333 GN=clsA PE=1 SV=1	1	6	6	6	1	0	1	5	3	3	1	0	1	5	3	3	1	0	1	5	3	3	15.6	15.6	15.6	54.822	486	486	0	25.005	By matching		By matching	By MS/MS	By MS/MS	By MS/MS	2.3	0	2.9	13.4	7.6	8.6
P0A6I0	P0A6I0	6	6	6	Cytidylate kinase	cmk	sp|P0A6I0|KCY_ECOLI Cytidylate kinase OS=Escherichia coli (strain K12) OX=83333 GN=cmk PE=1 SV=1	1	6	6	6	0	2	2	3	4	5	0	2	2	3	4	5	0	2	2	3	4	5	40.1	40.1	40.1	24.746	227	227	0	44.471		By MS/MS	By matching	By MS/MS	By MS/MS	By MS/MS	0	11.9	7.9	24.7	26.9	32.6
P0A6I3	P0A6I3	7	7	7	Pantothenate kinase	coaA	sp|P0A6I3|COAA_ECOLI Pantothenate kinase OS=Escherichia coli (strain K12) OX=83333 GN=coaA PE=1 SV=1	1	7	7	7	2	0	1	5	4	3	2	0	1	5	4	3	2	0	1	5	4	3	29.1	29.1	29.1	36.359	316	316	0	34.914	By matching		By matching	By MS/MS	By MS/MS	By MS/MS	7.9	0	5.4	22.5	16.5	12.3
P0A6I6	P0A6I6	2	2	2	Phosphopantetheine adenylyltransferase	coaD	sp|P0A6I6|COAD_ECOLI Phosphopantetheine adenylyltransferase OS=Escherichia coli (strain K12) OX=83333 GN=coaD PE=1 SV=1	1	2	2	2	0	0	0	2	1	1	0	0	0	2	1	1	0	0	0	2	1	1	18.2	18.2	18.2	17.836	159	159	0	8.9992				By MS/MS	By MS/MS	By MS/MS	0	0	0	18.2	11.3	6.9
P0A6J3	P0A6J3	3	3	3	Sulfate transporter CysZ	cysZ	sp|P0A6J3|CYSZ_ECOLI Sulfate transporter CysZ OS=Escherichia coli (strain K12) OX=83333 GN=cysZ PE=1 SV=1	1	3	3	3	1	0	0	2	0	3	1	0	0	2	0	3	1	0	0	2	0	3	13.8	13.8	13.8	29.305	253	253	0	5.4263	By matching			By MS/MS		By MS/MS	4.3	0	0	7.5	0	13.8
P0A6J5	P0A6J5	12	12	12	D-amino acid dehydrogenase	dadA	sp|P0A6J5|DADA_ECOLI D-amino acid dehydrogenase OS=Escherichia coli (strain K12) OX=83333 GN=dadA PE=1 SV=1	1	12	12	12	3	8	7	12	12	11	3	8	7	12	12	11	3	8	7	12	12	11	41.9	41.9	41.9	47.607	432	432	0	165.68	By MS/MS	By MS/MS	By MS/MS	By MS/MS	By MS/MS	By MS/MS	10	24.3	22.5	41.9	41.9	37.5
P0A6J8	P0A6J8	7	7	7	D-alanine--D-alanine ligase A	ddlA	sp|P0A6J8|DDLA_ECOLI D-alanine--D-alanine ligase A OS=Escherichia coli (strain K12) OX=83333 GN=ddlA PE=1 SV=1	1	7	7	7	3	4	3	4	5	5	3	4	3	4	5	5	3	4	3	4	5	5	25.3	25.3	25.3	39.315	364	364	0	26.884	By MS/MS	By MS/MS	By MS/MS	By MS/MS	By MS/MS	By MS/MS	9.6	14.6	10.7	15.9	20.1	17.3
P0A6K3	P0A6K3	9	9	9	Peptide deformylase	def	sp|P0A6K3|DEF_ECOLI Peptide deformylase OS=Escherichia coli (strain K12) OX=83333 GN=def PE=1 SV=2	1	9	9	9	8	7	8	7	8	7	8	7	8	7	8	7	8	7	8	7	8	7	61.5	61.5	61.5	19.328	169	169	0	130.86	By MS/MS	By MS/MS	By MS/MS	By MS/MS	By MS/MS	By MS/MS	45.6	59.8	45.6	43.8	59.8	45.6
P0A6K6	P0A6K6	20	20	20	Phosphopentomutase	deoB	sp|P0A6K6|DEOB_ECOLI Phosphopentomutase OS=Escherichia coli (strain K12) OX=83333 GN=deoB PE=1 SV=1	1	20	20	20	18	18	18	19	19	17	18	18	18	19	19	17	18	18	18	19	19	17	72.2	72.2	72.2	44.369	407	407	0	323.31	By MS/MS	By MS/MS	By MS/MS	By MS/MS	By MS/MS	By MS/MS	69	61.7	68.8	71.3	71.3	68.8
P0A6L0	P0A6L0	10	10	10	Deoxyribose-phosphate aldolase	deoC	sp|P0A6L0|DEOC_ECOLI Deoxyribose-phosphate aldolase OS=Escherichia coli (strain K12) OX=83333 GN=deoC PE=1 SV=1	1	10	10	10	9	9	9	8	9	10	9	9	9	8	9	10	9	9	9	8	9	10	54.1	54.1	54.1	27.733	259	259	0	135.22	By MS/MS	By MS/MS	By MS/MS	By MS/MS	By MS/MS	By MS/MS	48.6	47.5	48.6	42.1	47.5	54.1
P0A6L2	P0A6L2	5	5	5	4-hydroxy-tetrahydrodipicolinate synthase	dapA	sp|P0A6L2|DAPA_ECOLI 4-hydroxy-tetrahydrodipicolinate synthase OS=Escherichia coli (strain K12) OX=83333 GN=dapA PE=1 SV=1	1	5	5	5	4	3	3	4	4	5	4	3	3	4	4	5	4	3	3	4	4	5	25	25	25	31.27	292	292	0	35.56	By MS/MS	By MS/MS	By MS/MS	By MS/MS	By MS/MS	By MS/MS	21.2	17.1	14	21.2	21.2	25
P0A6L4	P0A6L4	10	10	10	N-acetylneuraminate lyase	nanA	sp|P0A6L4|NANA_ECOLI N-acetylneuraminate lyase OS=Escherichia coli (strain K12) OX=83333 GN=nanA PE=1 SV=2	1	10	10	10	8	6	5	10	10	9	8	6	5	10	10	9	8	6	5	10	10	9	49.5	49.5	49.5	32.593	297	297	0	245.92	By MS/MS	By MS/MS	By MS/MS	By MS/MS	By MS/MS	By MS/MS	38.4	34.7	24.2	49.5	49.5	46.5
P0A6M2	P0A6M2	2	2	2	Disulfide bond formation protein B	dsbB	sp|P0A6M2|DSBB_ECOLI Disulfide bond formation protein B OS=Escherichia coli (strain K12) OX=83333 GN=dsbB PE=1 SV=1	1	2	2	2	1	1	1	2	2	1	1	1	1	2	2	1	1	1	1	2	2	1	13.6	13.6	13.6	20.142	176	176	0	5.7411	By matching	By MS/MS	By matching	By MS/MS	By MS/MS	By MS/MS	5.1	8.5	5.1	13.6	13.6	5.1
P0A6M8	P0A6M8	36	36	36	Elongation factor G	fusA	sp|P0A6M8|EFG_ECOLI Elongation factor G OS=Escherichia coli (strain K12) OX=83333 GN=fusA PE=1 SV=2	1	36	36	36	29	33	31	34	35	34	29	33	31	34	35	34	29	33	31	34	35	34	68.5	68.5	68.5	77.58	704	704	0	323.31	By MS/MS	By MS/MS	By MS/MS	By MS/MS	By MS/MS	By MS/MS	56.5	63.2	57	61.4	67.5	67.5
P0A6N4	P0A6N4	5	5	5	Elongation factor P	efp	sp|P0A6N4|EFP_ECOLI Elongation factor P OS=Escherichia coli (strain K12) OX=83333 GN=efp PE=1 SV=2	1	5	5	5	5	5	4	5	5	4	5	5	4	5	5	4	5	5	4	5	5	4	30.9	30.9	30.9	20.591	188	188	0	46.086	By MS/MS	By MS/MS	By MS/MS	By MS/MS	By MS/MS	By MS/MS	30.9	30.9	26.1	30.9	30.9	26.1
P0A6N8	P0A6N8	4	4	4	Elongation factor P-like protein	yeiP	sp|P0A6N8|EFPL_ECOLI Elongation factor P-like protein OS=Escherichia coli (strain K12) OX=83333 GN=yeiP PE=1 SV=1	1	4	4	4	4	1	2	4	1	3	4	1	2	4	1	3	4	1	2	4	1	3	28.9	28.9	28.9	21.532	190	190	0	13.378	By MS/MS	By MS/MS	By MS/MS	By MS/MS	By MS/MS	By MS/MS	28.9	12.1	11.6	28.9	5.3	23.7
P0A6P1	P0A6P1	20	20	20	Elongation factor Ts	tsf	sp|P0A6P1|EFTS_ECOLI Elongation factor Ts OS=Escherichia coli (strain K12) OX=83333 GN=tsf PE=1 SV=2	1	20	20	20	18	17	17	19	19	19	18	17	17	19	19	19	18	17	17	19	19	19	73.1	73.1	73.1	30.423	283	283	0	323.31	By MS/MS	By MS/MS	By MS/MS	By MS/MS	By MS/MS	By MS/MS	65	69.6	68.2	73.1	73.1	73.1
P0A6P5	P0A6P5	20	20	20	GTPase Der	der	sp|P0A6P5|DER_ECOLI GTPase Der OS=Escherichia coli (strain K12) OX=83333 GN=der PE=1 SV=1	1	20	20	20	8	6	6	14	16	16	8	6	6	14	16	16	8	6	6	14	16	16	50.6	50.6	50.6	55.035	490	490	0	311.26	By MS/MS	By MS/MS	By MS/MS	By MS/MS	By MS/MS	By MS/MS	18.6	16.5	13.1	33.7	40.8	39.4
P0A6P7	P0A6P7	3	3	3	Probable GTP-binding protein EngB	engB	sp|P0A6P7|ENGB_ECOLI Probable GTP-binding protein EngB OS=Escherichia coli (strain K12) OX=83333 GN=engB PE=1 SV=1	1	3	3	3	1	1	2	2	3	1	1	1	2	2	3	1	1	1	2	2	3	1	19.5	19.5	19.5	23.561	210	210	0	41.96	By MS/MS	By matching	By matching	By MS/MS	By MS/MS	By matching	5.2	6.2	13.3	13.3	19.5	8.1
P0A6P9	P0A6P9	18	18	18	Enolase	eno	sp|P0A6P9|ENO_ECOLI Enolase OS=Escherichia coli (strain K12) OX=83333 GN=eno PE=1 SV=2	1	18	18	18	16	16	16	17	18	17	16	16	16	17	18	17	16	16	16	17	18	17	71.3	71.3	71.3	45.654	432	432	0	323.31	By MS/MS	By MS/MS	By MS/MS	By MS/MS	By MS/MS	By MS/MS	56.5	56.5	56.5	63.4	71.3	63.4
P0A6Q3	P0A6Q3	7	7	7	3-hydroxydecanoyl-[acyl-carrier-protein] dehydratase	fabA	sp|P0A6Q3|FABA_ECOLI 3-hydroxydecanoyl-[acyl-carrier-protein] dehydratase OS=Escherichia coli (strain K12) OX=83333 GN=fabA PE=1 SV=2	1	7	7	7	6	6	7	7	7	6	6	6	7	7	7	6	6	6	7	7	7	6	44.2	44.2	44.2	18.969	172	172	0	39.721	By MS/MS	By MS/MS	By MS/MS	By MS/MS	By MS/MS	By MS/MS	36	38.4	44.2	44.2	44.2	36
P0A6Q6	P0A6Q6	6	6	6	3-hydroxyacyl-[acyl-carrier-protein] dehydratase FabZ	fabZ	sp|P0A6Q6|FABZ_ECOLI 3-hydroxyacyl-[acyl-carrier-protein] dehydratase FabZ OS=Escherichia coli (strain K12) OX=83333 GN=fabZ PE=1 SV=1	1	6	6	6	5	5	4	6	4	4	5	5	4	6	4	4	5	5	4	6	4	4	55.6	55.6	55.6	17.033	151	151	0	63.172	By MS/MS	By MS/MS	By MS/MS	By MS/MS	By MS/MS	By MS/MS	45	50.3	39.7	55.6	34.4	39.7
P0A6R0	P0A6R0	10	10	10	3-oxoacyl-[acyl-carrier-protein] synthase 3	fabH	sp|P0A6R0|FABH_ECOLI 3-oxoacyl-[acyl-carrier-protein] synthase 3 OS=Escherichia coli (strain K12) OX=83333 GN=fabH PE=1 SV=1	1	10	10	10	4	3	8	9	10	10	4	3	8	9	10	10	4	3	8	9	10	10	47.3	47.3	47.3	33.515	317	317	0	121.15	By MS/MS	By MS/MS	By MS/MS	By MS/MS	By MS/MS	By MS/MS	18.9	14.5	40.1	41.6	47.3	47.3
P0A6R3	P0A6R3	2	2	2	DNA-binding protein Fis	fis	sp|P0A6R3|FIS_ECOLI DNA-binding protein Fis OS=Escherichia coli (strain K12) OX=83333 GN=fis PE=1 SV=1	1	2	2	2	2	1	1	2	2	2	2	1	1	2	2	2	2	1	1	2	2	2	23.5	23.5	23.5	11.24	98	98	0	86.76	By MS/MS	By MS/MS	By MS/MS	By MS/MS	By MS/MS	By MS/MS	23.5	23.5	23.5	23.5	23.5	23.5
P0A6S7	P0A6S7	10	10	10	Glycerol-3-phosphate dehydrogenase [NAD(P)+]	gpsA	sp|P0A6S7|GPDA_ECOLI Glycerol-3-phosphate dehydrogenase [NAD(P)+] OS=Escherichia coli (strain K12) OX=83333 GN=gpsA PE=3 SV=1	1	10	10	10	3	4	6	7	10	9	3	4	6	7	10	9	3	4	6	7	10	9	48.4	48.4	48.4	36.361	339	339	0	99.932	By matching	By MS/MS	By matching	By MS/MS	By MS/MS	By MS/MS	10	15.3	20.4	25.1	48.4	42.8
P0A6T1;CON__Q3ZBD7	P0A6T1	21;1	21;1	21;1	Glucose-6-phosphate isomerase	pgi	sp|P0A6T1|G6PI_ECOLI Glucose-6-phosphate isomerase OS=Escherichia coli (strain K12) OX=83333 GN=pgi PE=1 SV=1	2	21	21	21	17	12	11	15	19	16	17	12	11	15	19	16	17	12	11	15	19	16	55.6	55.6	55.6	61.529	549	549;557	0	170.94	By MS/MS	By MS/MS	By MS/MS	By MS/MS	By MS/MS	By MS/MS	42.8	27.5	25.1	37.9	48.8	39.9
P0A6T3	P0A6T3	6	6	6	Galactokinase	galK	sp|P0A6T3|GAL1_ECOLI Galactokinase OS=Escherichia coli (strain K12) OX=83333 GN=galK PE=1 SV=2	1	6	6	6	3	1	1	5	6	5	3	1	1	5	6	5	3	1	1	5	6	5	30.1	30.1	30.1	41.442	382	382	0	92.756	By MS/MS	By matching	By matching	By MS/MS	By MS/MS	By MS/MS	11.5	3.7	3.7	24.3	30.1	24.3
P0A6T5	P0A6T5	12	12	12	GTP cyclohydrolase 1	folE	sp|P0A6T5|GCH1_ECOLI GTP cyclohydrolase 1 OS=Escherichia coli (strain K12) OX=83333 GN=folE PE=1 SV=2	1	12	12	12	12	9	11	12	9	11	12	9	11	12	9	11	12	9	11	12	9	11	69.8	69.8	69.8	24.83	222	222	0	240.37	By MS/MS	By MS/MS	By MS/MS	By MS/MS	By MS/MS	By MS/MS	69.8	48.6	61.7	69.8	51.4	61.7
P0A6T9	P0A6T9	1	1	1	Glycine cleavage system H protein	gcvH	sp|P0A6T9|GCSH_ECOLI Glycine cleavage system H protein OS=Escherichia coli (strain K12) OX=83333 GN=gcvH PE=1 SV=2	1	1	1	1	0	0	1	1	1	1	0	0	1	1	1	1	0	0	1	1	1	1	17.8	17.8	17.8	13.811	129	129	0	7.0537			By matching	By MS/MS	By MS/MS	By MS/MS	0	0	17.8	17.8	17.8	17.8
P0A6U3	P0A6U3	19	19	19	tRNA uridine 5-carboxymethylaminomethyl modification enzyme MnmG	mnmG	sp|P0A6U3|MNMG_ECOLI tRNA uridine 5-carboxymethylaminomethyl modification enzyme MnmG OS=Escherichia coli (strain K12) OX=83333 GN=mnmG PE=1 SV=1	1	19	19	19	12	6	8	16	16	15	12	6	8	16	16	15	12	6	8	16	16	15	39.7	39.7	39.7	69.52	629	629	0	104.29	By MS/MS	By MS/MS	By MS/MS	By MS/MS	By MS/MS	By MS/MS	22.9	10.7	18.1	32.3	33.7	28.6
P0A6U5	P0A6U5	5	5	5	Ribosomal RNA small subunit methyltransferase G	rsmG	sp|P0A6U5|RSMG_ECOLI Ribosomal RNA small subunit methyltransferase G OS=Escherichia coli (strain K12) OX=83333 GN=rsmG PE=1 SV=1	1	5	5	5	1	1	1	3	4	3	1	1	1	3	4	3	1	1	1	3	4	3	36.2	36.2	36.2	23.431	207	207	0	22.778	By matching	By matching	By matching	By MS/MS	By MS/MS	By MS/MS	5.3	5.3	5.3	23.7	25.6	23.7
P0A6U8	P0A6U8	9	9	9	Glycogen synthase	glgA	sp|P0A6U8|GLGA_ECOLI Glycogen synthase OS=Escherichia coli (strain K12) OX=83333 GN=glgA PE=1 SV=1	1	9	9	9	1	1	0	6	6	7	1	1	0	6	6	7	1	1	0	6	6	7	24.7	24.7	24.7	52.822	477	477	0	54.55	By matching	By matching		By MS/MS	By MS/MS	By MS/MS	2.1	2.7	0	17.2	19.5	19.5
P0A6V1	P0A6V1	5	5	5	Glucose-1-phosphate adenylyltransferase	glgC	sp|P0A6V1|GLGC_ECOLI Glucose-1-phosphate adenylyltransferase OS=Escherichia coli (strain K12) OX=83333 GN=glgC PE=1 SV=2	1	5	5	5	3	0	0	4	2	2	3	0	0	4	2	2	3	0	0	4	2	2	17.6	17.6	17.6	48.697	431	431	0	13.527	By MS/MS			By MS/MS	By MS/MS	By MS/MS	7.9	0	0	11.1	8.8	5.6
P0A6V8	P0A6V8	9	9	9	Glucokinase	glk	sp|P0A6V8|GLK_ECOLI Glucokinase OS=Escherichia coli (strain K12) OX=83333 GN=glk PE=1 SV=1	1	9	9	9	5	3	4	8	6	6	5	3	4	8	6	6	5	3	4	8	6	6	41.7	41.7	41.7	34.723	321	321	0	70.229	By MS/MS	By MS/MS	By MS/MS	By MS/MS	By MS/MS	By MS/MS	16.5	10.9	13.1	37.1	22.4	25.9
P0A6W0	P0A6W0	1	1	1	Glutaminase 2	glsA2	sp|P0A6W0|GLSA2_ECOLI Glutaminase 2 OS=Escherichia coli (strain K12) OX=83333 GN=glsA2 PE=1 SV=1	1	1	1	1	0	0	0	0	1	0	0	0	0	0	1	0	0	0	0	0	1	0	2.6	2.6	2.6	33.515	308	308	0.0060484	2.824					By MS/MS		0	0	0	0	2.6	0
P0A6W3	P0A6W3	2	2	2	Phospho-N-acetylmuramoyl-pentapeptide-transferase	mraY	sp|P0A6W3|MRAY_ECOLI Phospho-N-acetylmuramoyl-pentapeptide-transferase OS=Escherichia coli (strain K12) OX=83333 GN=mraY PE=1 SV=1	1	2	2	2	2	1	1	2	1	1	2	1	1	2	1	1	2	1	1	2	1	1	5	5	5	39.874	360	360	0	5.5731	By MS/MS	By matching	By MS/MS	By MS/MS	By MS/MS	By MS/MS	5	2.8	2.2	5	2.8	2.2
P0A6W5	P0A6W5	9	9	9	Transcription elongation factor GreA	greA	sp|P0A6W5|GREA_ECOLI Transcription elongation factor GreA OS=Escherichia coli (strain K12) OX=83333 GN=greA PE=1 SV=1	1	9	9	9	6	6	4	9	7	8	6	6	4	9	7	8	6	6	4	9	7	8	58.9	58.9	58.9	17.641	158	158	0	40.138	By MS/MS	By MS/MS	By matching	By MS/MS	By MS/MS	By MS/MS	39.2	41.8	25.9	58.9	47.5	53.2
P0A6W9	P0A6W9	12	12	12	Glutamate--cysteine ligase	gshA	sp|P0A6W9|GSH1_ECOLI Glutamate--cysteine ligase OS=Escherichia coli (strain K12) OX=83333 GN=gshA PE=1 SV=1	1	12	12	12	8	8	6	7	10	9	8	8	6	7	10	9	8	8	6	7	10	9	30.7	30.7	30.7	58.269	518	518	0	49.254	By MS/MS	By MS/MS	By MS/MS	By MS/MS	By MS/MS	By MS/MS	19.3	18.1	14.7	14.9	24.9	22.6
P0A6X3	P0A6X3	5	5	5	RNA-binding protein Hfq	hfq	sp|P0A6X3|HFQ_ECOLI RNA-binding protein Hfq OS=Escherichia coli (strain K12) OX=83333 GN=hfq PE=1 SV=2	1	5	5	5	2	3	3	4	2	2	2	3	3	4	2	2	2	3	3	4	2	2	45.1	45.1	45.1	11.166	102	102	0	53.232	By MS/MS	By MS/MS	By MS/MS	By MS/MS	By MS/MS	By MS/MS	24.5	33.3	26.5	36.3	24.5	24.5
P0A6X7	P0A6X7	2	2	2	Integration host factor subunit alpha	ihfA	sp|P0A6X7|IHFA_ECOLI Integration host factor subunit alpha OS=Escherichia coli (strain K12) OX=83333 GN=ihfA PE=1 SV=1	1	2	2	2	2	1	1	2	1	0	2	1	1	2	1	0	2	1	1	2	1	0	19.2	19.2	19.2	11.354	99	99	0	5.7375	By MS/MS	By MS/MS	By matching	By MS/MS	By MS/MS		19.2	10.1	10.1	19.2	10.1	0
P0A6Y1	P0A6Y1	2	2	2	Integration host factor subunit beta	ihfB	sp|P0A6Y1|IHFB_ECOLI Integration host factor subunit beta OS=Escherichia coli (strain K12) OX=83333 GN=ihfB PE=1 SV=1	1	2	2	2	2	1	2	2	2	2	2	1	2	2	2	2	2	1	2	2	2	2	27.7	27.7	27.7	10.651	94	94	0	10.163	By MS/MS	By MS/MS	By matching	By MS/MS	By MS/MS	By MS/MS	27.7	16	27.7	27.7	27.7	27.7
P0A6Y5	P0A6Y5	9	9	9	33 kDa chaperonin	hslO	sp|P0A6Y5|HSLO_ECOLI 33 kDa chaperonin OS=Escherichia coli (strain K12) OX=83333 GN=hslO PE=1 SV=1	1	9	9	9	7	6	8	7	8	9	7	6	8	7	8	9	7	6	8	7	8	9	52.4	52.4	52.4	32.534	292	292	0	173.69	By MS/MS	By MS/MS	By MS/MS	By MS/MS	By MS/MS	By MS/MS	40.1	26.7	46.2	43.8	46.2	52.4
P0A6Y8	P0A6Y8	32	32	32	Chaperone protein DnaK	dnaK	sp|P0A6Y8|DNAK_ECOLI Chaperone protein DnaK OS=Escherichia coli (strain K12) OX=83333 GN=dnaK PE=1 SV=2	1	32	32	32	31	27	28	31	31	29	31	27	28	31	31	29	31	27	28	31	31	29	64.1	64.1	64.1	69.114	638	638	0	323.31	By MS/MS	By MS/MS	By MS/MS	By MS/MS	By MS/MS	By MS/MS	64.1	60.8	57.5	61.9	62.4	60
P0A6Z1	P0A6Z1	18	18	18	Chaperone protein HscA	hscA	sp|P0A6Z1|HSCA_ECOLI Chaperone protein HscA OS=Escherichia coli (strain K12) OX=83333 GN=hscA PE=1 SV=1	1	18	18	18	6	4	8	14	15	14	6	4	8	14	15	14	6	4	8	14	15	14	40.4	40.4	40.4	65.652	616	616	0	188.04	By MS/MS	By MS/MS	By MS/MS	By MS/MS	By MS/MS	By MS/MS	13.8	7.1	19.5	28.6	33.4	33.9
P0A6Z3	P0A6Z3	30	30	30	Chaperone protein HtpG	htpG	sp|P0A6Z3|HTPG_ECOLI Chaperone protein HtpG OS=Escherichia coli (strain K12) OX=83333 GN=htpG PE=1 SV=1	1	30	30	30	24	21	22	27	24	27	24	21	22	27	24	27	24	21	22	27	24	27	62	62	62	71.422	624	624	0	323.31	By MS/MS	By MS/MS	By MS/MS	By MS/MS	By MS/MS	By MS/MS	49.2	44.6	46	57.5	50.3	57.2
P0A705	P0A705	32	32	32	Translation initiation factor IF-2	infB	sp|P0A705|IF2_ECOLI Translation initiation factor IF-2 OS=Escherichia coli (strain K12) OX=83333 GN=infB PE=1 SV=1	1	32	32	32	27	20	19	31	29	30	27	20	19	31	29	30	27	20	19	31	29	30	52.4	52.4	52.4	97.349	890	890	0	323.31	By MS/MS	By MS/MS	By MS/MS	By MS/MS	By MS/MS	By MS/MS	44.5	29.4	29.6	49	47	49.6
P0A707	P0A707	6	6	6	Translation initiation factor IF-3;Translation initiation factor IF-3, N-terminally processed;Translation initiation factor IF-3S	infC	sp|P0A707|IF3_ECOLI Translation initiation factor IF-3 OS=Escherichia coli (strain K12) OX=83333 GN=infC PE=1 SV=1	1	6	6	6	6	4	4	6	5	5	6	4	4	6	5	5	6	4	4	6	5	5	48.3	48.3	48.3	20.564	180	180	0	246.63	By MS/MS	By MS/MS	By MS/MS	By MS/MS	By MS/MS	By MS/MS	48.3	35.6	35.6	48.3	40.6	40.6
P0A715	P0A715	13	13	13	2-dehydro-3-deoxyphosphooctonate aldolase	kdsA	sp|P0A715|KDSA_ECOLI 2-dehydro-3-deoxyphosphooctonate aldolase OS=Escherichia coli (strain K12) OX=83333 GN=kdsA PE=1 SV=1	1	13	13	13	6	7	6	10	10	9	6	7	6	10	10	9	6	7	6	10	10	9	59.5	59.5	59.5	30.832	284	284	0	105.2	By MS/MS	By MS/MS	By MS/MS	By MS/MS	By MS/MS	By MS/MS	30.3	23.2	21.8	46.1	45.1	38.4
P0A717	P0A717	14	14	14	Ribose-phosphate pyrophosphokinase	prs	sp|P0A717|KPRS_ECOLI Ribose-phosphate pyrophosphokinase OS=Escherichia coli (strain K12) OX=83333 GN=prs PE=1 SV=2	1	14	14	14	11	8	5	14	14	14	11	8	5	14	14	14	11	8	5	14	14	14	56.2	56.2	56.2	34.218	315	315	0	323.31	By MS/MS	By MS/MS	By MS/MS	By MS/MS	By MS/MS	By MS/MS	51.4	37.1	22.9	56.2	56.2	56.2
P0A720	P0A720	8	8	8	Thymidylate kinase	tmk	sp|P0A720|KTHY_ECOLI Thymidylate kinase OS=Escherichia coli (strain K12) OX=83333 GN=tmk PE=1 SV=1	1	8	8	8	0	0	0	8	2	6	0	0	0	8	2	6	0	0	0	8	2	6	46	46	46	23.783	213	213	0	51.707				By MS/MS	By MS/MS	By MS/MS	0	0	0	46	11.3	33.8
P0A722	P0A722	5	5	5	Acyl-[acyl-carrier-protein]--UDP-N-acetylglucosamine O-acyltransferase	lpxA	sp|P0A722|LPXA_ECOLI Acyl-[acyl-carrier-protein]--UDP-N-acetylglucosamine O-acyltransferase OS=Escherichia coli (strain K12) OX=83333 GN=lpxA PE=1 SV=1	1	5	5	5	5	4	5	5	5	5	5	4	5	5	5	5	5	4	5	5	5	5	24	24	24	28.08	262	262	0	151.43	By MS/MS	By MS/MS	By MS/MS	By MS/MS	By MS/MS	By MS/MS	24	16.4	24	24	24	24
P0A725	P0A725	9	9	9	UDP-3-O-[3-hydroxymyristoyl] N-acetylglucosamine deacetylase	lpxC	sp|P0A725|LPXC_ECOLI UDP-3-O-acyl-N-acetylglucosamine deacetylase OS=Escherichia coli (strain K12) OX=83333 GN=lpxC PE=1 SV=1	1	9	9	9	0	2	2	6	8	8	0	2	2	6	8	8	0	2	2	6	8	8	24.9	24.9	24.9	33.956	305	305	0	37.543		By matching	By MS/MS	By MS/MS	By MS/MS	By MS/MS	0	7.5	5.2	17	24.6	22.3
P0A729	P0A729	4	4	4	Maf-like protein YceF	yceF	sp|P0A729|NTPPB_ECOLI 7-methyl-GTP pyrophosphatase OS=Escherichia coli (strain K12) OX=83333 GN=yceF PE=1 SV=1	1	4	4	4	2	2	1	3	3	3	2	2	1	3	3	3	2	2	1	3	3	3	17.5	17.5	17.5	21.691	194	194	0	13.318	By MS/MS	By MS/MS	By MS/MS	By MS/MS	By MS/MS	By MS/MS	5.7	11.3	5.7	11.9	11.3	11.9
P0A731	P0A731	3	3	3	Methylglyoxal synthase	mgsA	sp|P0A731|MGSA_ECOLI Methylglyoxal synthase OS=Escherichia coli (strain K12) OX=83333 GN=mgsA PE=1 SV=1	1	3	3	3	1	0	0	2	2	2	1	0	0	2	2	2	1	0	0	2	2	2	27.6	27.6	27.6	16.918	152	152	0	19.016	By MS/MS			By MS/MS	By MS/MS	By MS/MS	14.5	0	0	21.7	20.4	20.4
P0A734	P0A734	5	5	5	Cell division topological specificity factor	minE	sp|P0A734|MINE_ECOLI Cell division topological specificity factor OS=Escherichia coli (strain K12) OX=83333 GN=minE PE=1 SV=1	1	5	5	5	2	1	2	4	4	2	2	1	2	4	4	2	2	1	2	4	4	2	60.2	60.2	60.2	10.235	88	88	0	18.192	By MS/MS	By matching	By MS/MS	By MS/MS	By MS/MS	By MS/MS	22.7	9.1	23.9	42	51.1	23.9
P0A738	P0A738	1	1	1	Cyclic pyranopterin monophosphate synthase accessory protein	moaC	sp|P0A738|MOAC_ECOLI Cyclic pyranopterin monophosphate synthase OS=Escherichia coli (strain K12) OX=83333 GN=moaC PE=1 SV=2	1	1	1	1	1	0	1	1	1	1	1	0	1	1	1	1	1	0	1	1	1	1	8.1	8.1	8.1	17.467	161	161	0.0027739	3.2119	By MS/MS		By matching	By MS/MS	By MS/MS	By MS/MS	8.1	0	8.1	8.1	8.1	8.1
P0A742	P0A742	3	3	3	Large-conductance mechanosensitive channel	mscL	sp|P0A742|MSCL_ECOLI Large-conductance mechanosensitive channel OS=Escherichia coli (strain K12) OX=83333 GN=mscL PE=1 SV=1	1	3	3	3	3	1	2	3	2	3	3	1	2	3	2	3	3	1	2	3	2	3	19.9	19.9	19.9	14.957	136	136	0	7.835	By MS/MS	By MS/MS	By matching	By MS/MS	By MS/MS	By MS/MS	19.9	8.1	14.7	19.9	14.7	19.9
P0A744	P0A744	1	1	1	Peptide methionine sulfoxide reductase MsrA	msrA	sp|P0A744|MSRA_ECOLI Peptide methionine sulfoxide reductase MsrA OS=Escherichia coli (strain K12) OX=83333 GN=msrA PE=1 SV=2	1	1	1	1	1	1	1	1	1	1	1	1	1	1	1	1	1	1	1	1	1	1	7.1	7.1	7.1	23.315	212	212	0.0091683	2.4636	By MS/MS	By MS/MS	By MS/MS	By MS/MS	By MS/MS	By MS/MS	7.1	7.1	7.1	7.1	7.1	7.1
P0A749	P0A749	12	12	12	UDP-N-acetylglucosamine 1-carboxyvinyltransferase	murA	sp|P0A749|MURA_ECOLI UDP-N-acetylglucosamine 1-carboxyvinyltransferase OS=Escherichia coli (strain K12) OX=83333 GN=murA PE=1 SV=1	1	12	12	12	6	8	4	11	11	9	6	8	4	11	11	9	6	8	4	11	11	9	35.1	35.1	35.1	44.817	419	419	0	111.3	By MS/MS	By MS/MS	By MS/MS	By MS/MS	By MS/MS	By MS/MS	16.2	22.9	11.5	31.7	33.4	27
P0A759	P0A759	11	11	11	Glucosamine-6-phosphate deaminase	nagB	sp|P0A759|NAGB_ECOLI Glucosamine-6-phosphate deaminase OS=Escherichia coli (strain K12) OX=83333 GN=nagB PE=1 SV=1	1	11	11	11	2	5	5	11	9	10	2	5	5	11	9	10	2	5	5	11	9	10	61.3	61.3	61.3	29.774	266	266	0	79.58	By MS/MS	By MS/MS	By MS/MS	By MS/MS	By MS/MS	By MS/MS	8.6	25.9	25.9	61.3	51.5	55.6
P0A761	P0A761	10	10	10	Putative N-acetylmannosamine-6-phosphate 2-epimerase	nanE	sp|P0A761|NANE_ECOLI Putative N-acetylmannosamine-6-phosphate 2-epimerase OS=Escherichia coli (strain K12) OX=83333 GN=nanE PE=1 SV=1	1	10	10	10	4	3	5	7	8	8	4	3	5	7	8	8	4	3	5	7	8	8	52.8	52.8	52.8	24.073	229	229	0	59.504	By MS/MS	By MS/MS	By MS/MS	By MS/MS	By MS/MS	By MS/MS	14	14	17.5	42.8	52.8	52.4
P0A763	P0A763	7	7	7	Nucleoside diphosphate kinase	ndk	sp|P0A763|NDK_ECOLI Nucleoside diphosphate kinase OS=Escherichia coli (strain K12) OX=83333 GN=ndk PE=1 SV=2	1	7	7	7	3	5	4	7	6	7	3	5	4	7	6	7	3	5	4	7	6	7	65.7	65.7	65.7	15.463	143	143	0	134.03	By MS/MS	By MS/MS	By MS/MS	By MS/MS	By MS/MS	By MS/MS	30.8	53.1	41.3	65.7	59.4	65.7
P0A780	P0A780	6	6	6	N utilization substance protein B	nusB	sp|P0A780|NUSB_ECOLI Transcription antitermination protein NusB OS=Escherichia coli (strain K12) OX=83333 GN=nusB PE=1 SV=1	1	6	6	6	5	3	5	5	5	5	5	3	5	5	5	5	5	3	5	5	5	5	46	46	46	15.689	139	139	0	36.083	By MS/MS	By MS/MS	By MS/MS	By MS/MS	By MS/MS	By MS/MS	38.8	19.4	40.3	38.1	40.3	33.1
P0A784	P0A784	2	2	2	Oligoribonuclease	orn	sp|P0A784|ORN_ECOLI Oligoribonuclease OS=Escherichia coli (strain K12) OX=83333 GN=orn PE=1 SV=2	1	2	2	2	2	2	2	2	2	1	2	2	2	2	2	1	2	2	2	2	2	1	9.9	9.9	9.9	20.815	181	181	0	5.0258	By MS/MS	By MS/MS	By matching	By MS/MS	By MS/MS	By MS/MS	9.9	9.9	9.9	9.9	9.9	5.5
P0A786	P0A786	5	5	5	Aspartate carbamoyltransferase catalytic chain	pyrB	sp|P0A786|PYRB_ECOLI Aspartate carbamoyltransferase catalytic subunit OS=Escherichia coli (strain K12) OX=83333 GN=pyrB PE=1 SV=2	1	5	5	5	0	2	1	3	3	3	0	2	1	3	3	3	0	2	1	3	3	3	17	17	17	34.427	311	311	0	10.828		By matching	By matching	By MS/MS	By MS/MS	By MS/MS	0	5.8	2.9	11.3	9.6	11.3
P0A790	P0A790	1	1	1	Aspartate 1-decarboxylase;Aspartate 1-decarboxylase beta chain;Aspartate 1-decarboxylase alpha chain	panD	sp|P0A790|PAND_ECOLI Aspartate 1-decarboxylase OS=Escherichia coli (strain K12) OX=83333 GN=panD PE=1 SV=1	1	1	1	1	0	1	0	0	0	0	0	1	0	0	0	0	0	1	0	0	0	0	7.9	7.9	7.9	13.834	126	126	0.0021097	3.4379		By MS/MS					0	7.9	0	0	0	0
P0A794	P0A794	8	8	8	Pyridoxine 5-phosphate synthase	pdxJ	sp|P0A794|PDXJ_ECOLI Pyridoxine 5-phosphate synthase OS=Escherichia coli (strain K12) OX=83333 GN=pdxJ PE=1 SV=2	1	8	8	8	8	6	4	7	5	3	8	6	4	7	5	3	8	6	4	7	5	3	46.9	46.9	46.9	26.384	243	243	0	57.46	By MS/MS	By MS/MS	By MS/MS	By MS/MS	By MS/MS	By MS/MS	46.9	35	19.3	42.4	28.8	11.1
P0A796	P0A796	15	15	15	ATP-dependent 6-phosphofructokinase isozyme 1	pfkA	sp|P0A796|PFKA_ECOLI ATP-dependent 6-phosphofructokinase isozyme 1 OS=Escherichia coli (strain K12) OX=83333 GN=pfkA PE=1 SV=1	1	15	15	15	9	11	4	13	12	15	9	11	4	13	12	15	9	11	4	13	12	15	65.9	65.9	65.9	34.842	320	320	0	257.77	By MS/MS	By MS/MS	By matching	By MS/MS	By MS/MS	By MS/MS	31.2	38.4	13.8	52.2	54.1	65.9
P0A799	P0A799	22	22	22	Phosphoglycerate kinase	pgk	sp|P0A799|PGK_ECOLI Phosphoglycerate kinase OS=Escherichia coli (strain K12) OX=83333 GN=pgk PE=1 SV=2	1	22	22	22	20	17	16	19	19	20	20	17	16	19	19	20	20	17	16	19	19	20	70.8	70.8	70.8	41.118	387	387	0	323.31	By MS/MS	By MS/MS	By MS/MS	By MS/MS	By MS/MS	By MS/MS	67.2	63.3	58.1	67.2	69.8	69.8
P0A7A2	P0A7A2	4	4	4	Probable phosphoglycerate mutase GpmB	gpmB	sp|P0A7A2|GPMB_ECOLI Probable phosphoglycerate mutase GpmB OS=Escherichia coli (strain K12) OX=83333 GN=gpmB PE=3 SV=1	1	4	4	4	2	3	3	4	4	2	2	3	3	4	4	2	2	3	3	4	4	2	20.5	20.5	20.5	24.065	215	215	0	13.349	By matching	By MS/MS	By matching	By MS/MS	By MS/MS	By MS/MS	9.8	14.4	14.4	20.5	20.5	9.8
P0A7A7	P0A7A7	35	35	35	Glycerol-3-phosphate acyltransferase	plsB	sp|P0A7A7|PLSB_ECOLI Glycerol-3-phosphate acyltransferase OS=Escherichia coli (strain K12) OX=83333 GN=plsB PE=1 SV=2	1	35	35	35	8	9	7	30	33	34	8	9	7	30	33	34	8	9	7	30	33	34	55.1	55.1	55.1	91.38	807	807	0	323.31	By MS/MS	By MS/MS	By matching	By MS/MS	By MS/MS	By MS/MS	9.7	10.9	7.9	48	51.3	52.5
P0A7A9	P0A7A9	8	8	8	Inorganic pyrophosphatase	ppa	sp|P0A7A9|IPYR_ECOLI Inorganic pyrophosphatase OS=Escherichia coli (strain K12) OX=83333 GN=ppa PE=1 SV=2	1	8	8	8	8	5	6	7	6	6	8	5	6	7	6	6	8	5	6	7	6	6	49.4	49.4	49.4	19.703	176	176	0	38.779	By MS/MS	By MS/MS	By MS/MS	By MS/MS	By MS/MS	By MS/MS	49.4	25.6	38.6	38.1	33.5	33.5
P0A7B1	P0A7B1	8	8	8	Polyphosphate kinase	ppk	sp|P0A7B1|PPK1_ECOLI Polyphosphate kinase OS=Escherichia coli (strain K12) OX=83333 GN=ppk PE=1 SV=2	1	8	8	8	1	0	0	6	3	4	1	0	0	6	3	4	1	0	0	6	3	4	14.1	14.1	14.1	80.431	688	688	0	22.622	By matching			By MS/MS	By MS/MS	By MS/MS	1.7	0	0	10.6	5.5	8.1
P0A7B5	P0A7B5	21	21	21	Glutamate 5-kinase	proB	sp|P0A7B5|PROB_ECOLI Glutamate 5-kinase OS=Escherichia coli (strain K12) OX=83333 GN=proB PE=1 SV=1	1	21	21	21	16	5	9	20	20	21	16	5	9	20	20	21	16	5	9	20	20	21	76	76	76	39.056	367	367	0	237.39	By MS/MS	By MS/MS	By MS/MS	By MS/MS	By MS/MS	By MS/MS	54.8	13.4	29.2	69.5	73.3	76
P0A7B8	P0A7B8	2	2	2	ATP-dependent protease subunit HslV	hslV	sp|P0A7B8|HSLV_ECOLI ATP-dependent protease subunit HslV OS=Escherichia coli (strain K12) OX=83333 GN=hslV PE=1 SV=2	1	2	2	2	2	1	1	2	2	2	2	1	1	2	2	2	2	1	1	2	2	2	11.9	11.9	11.9	19.093	176	176	0	27.915	By MS/MS	By MS/MS	By MS/MS	By MS/MS	By MS/MS	By MS/MS	11.9	6.2	6.2	11.9	11.9	11.9
P0A7C2	P0A7C2	8	8	8	LexA repressor	lexA	sp|P0A7C2|LEXA_ECOLI LexA repressor OS=Escherichia coli (strain K12) OX=83333 GN=lexA PE=1 SV=1	1	8	8	8	5	3	5	7	6	5	5	3	5	7	6	5	5	3	5	7	6	5	46	46	46	22.357	202	202	0	49.99	By MS/MS	By MS/MS	By MS/MS	By MS/MS	By MS/MS	By MS/MS	28.2	18.3	30.2	42.1	37.6	30.7
P0A7C6	P0A7C6	1	1	1	Peptidase E	pepE	sp|P0A7C6|PEPE_ECOLI Peptidase E OS=Escherichia coli (strain K12) OX=83333 GN=pepE PE=1 SV=1	1	1	1	1	1	0	0	1	1	1	1	0	0	1	1	1	1	0	0	1	1	1	4.8	4.8	4.8	24.57	229	229	0.0047847	3.0331	By MS/MS			By MS/MS	By MS/MS	By MS/MS	4.8	0	0	4.8	4.8	4.8
P0A7D4	P0A7D4	19	19	19	Adenylosuccinate synthetase	purA	sp|P0A7D4|PURA_ECOLI Adenylosuccinate synthetase OS=Escherichia coli (strain K12) OX=83333 GN=purA PE=1 SV=2	1	19	19	19	17	15	11	18	17	19	17	15	11	18	17	19	17	15	11	18	17	19	57.4	57.4	57.4	47.344	432	432	0	323.31	By MS/MS	By MS/MS	By MS/MS	By MS/MS	By MS/MS	By MS/MS	51.2	49.3	33.8	55.3	51.4	57.4
P0A7D7	P0A7D7	6	6	6	Phosphoribosylaminoimidazole-succinocarboxamide synthase	purC	sp|P0A7D7|PUR7_ECOLI Phosphoribosylaminoimidazole-succinocarboxamide synthase OS=Escherichia coli (strain K12) OX=83333 GN=purC PE=1 SV=1	1	6	6	6	1	0	1	5	6	6	1	0	1	5	6	6	1	0	1	5	6	6	29.1	29.1	29.1	26.995	237	237	0	39.34	By matching		By matching	By MS/MS	By MS/MS	By MS/MS	4.2	0	4.6	23.6	29.1	29.1
P0A7E1	P0A7E1	6	6	6	Dihydroorotate dehydrogenase (quinone)	pyrD	sp|P0A7E1|PYRD_ECOLI Dihydroorotate dehydrogenase (quinone) OS=Escherichia coli (strain K12) OX=83333 GN=pyrD PE=1 SV=1	1	6	6	6	4	3	0	5	1	2	4	3	0	5	1	2	4	3	0	5	1	2	21.7	21.7	21.7	36.774	336	336	0	22.725	By MS/MS	By MS/MS		By MS/MS	By matching	By MS/MS	15.8	12.5	0	18.8	4.8	7.1
P0A7E5	P0A7E5	28	28	28	CTP synthase	pyrG	sp|P0A7E5|PYRG_ECOLI CTP synthase OS=Escherichia coli (strain K12) OX=83333 GN=pyrG PE=1 SV=2	1	28	28	28	19	15	16	26	25	26	19	15	16	26	25	26	19	15	16	26	25	26	60.9	60.9	60.9	60.373	545	545	0	323.31	By MS/MS	By MS/MS	By MS/MS	By MS/MS	By MS/MS	By MS/MS	47.2	34.9	39.8	58.2	58.7	58.9
P0A7E9	P0A7E9	9	9	9	Uridylate kinase	pyrH	sp|P0A7E9|PYRH_ECOLI Uridylate kinase OS=Escherichia coli (strain K12) OX=83333 GN=pyrH PE=1 SV=2	1	9	9	9	3	1	3	5	7	6	3	1	3	5	7	6	3	1	3	5	7	6	55.2	55.2	55.2	25.97	241	241	0	172.08	By MS/MS	By matching	By matching	By MS/MS	By MS/MS	By MS/MS	16.6	4.6	16.6	28.6	47.7	43.6
P0A7F3	P0A7F3	3	3	3	Aspartate carbamoyltransferase regulatory chain	pyrI	sp|P0A7F3|PYRI_ECOLI Aspartate carbamoyltransferase regulatory chain OS=Escherichia coli (strain K12) OX=83333 GN=pyrI PE=1 SV=2	1	3	3	3	2	0	1	3	1	2	2	0	1	3	1	2	2	0	1	3	1	2	20.9	20.9	20.9	17.12	153	153	0	8.2118	By matching		By MS/MS	By MS/MS	By MS/MS	By MS/MS	14.4	0	9.8	20.9	9.8	16.3
P0A7F6	P0A7F6	5	5	5	S-adenosylmethionine decarboxylase proenzyme;S-adenosylmethionine decarboxylase beta chain;S-adenosylmethionine decarboxylase alpha chain	speD	sp|P0A7F6|SPED_ECOLI S-adenosylmethionine decarboxylase proenzyme OS=Escherichia coli (strain K12) OX=83333 GN=speD PE=1 SV=1	1	5	5	5	2	1	3	2	3	4	2	1	3	2	3	4	2	1	3	2	3	4	25.4	25.4	25.4	30.384	264	264	0	25.269	By MS/MS	By MS/MS	By MS/MS	By MS/MS	By MS/MS	By MS/MS	6.8	3.4	16.3	9.1	14.8	22
P0A7F9	P0A7F9	11	11	11	S-adenosylmethionine:tRNA ribosyltransferase-isomerase	queA	sp|P0A7F9|QUEA_ECOLI S-adenosylmethionine:tRNA ribosyltransferase-isomerase OS=Escherichia coli (strain K12) OX=83333 GN=queA PE=1 SV=1	1	11	11	11	4	4	3	10	9	8	4	4	3	10	9	8	4	4	3	10	9	8	57	57	57	39.43	356	356	0	97.462	By MS/MS	By MS/MS	By matching	By MS/MS	By MS/MS	By MS/MS	17.1	15.2	11.2	50.8	43.8	37.6
P0A7G2	P0A7G2	5	5	5	Ribosome-binding factor A	rbfA	sp|P0A7G2|RBFA_ECOLI 30S ribosome-binding factor OS=Escherichia coli (strain K12) OX=83333 GN=rbfA PE=1 SV=2	1	5	5	5	2	2	3	3	5	4	2	2	3	3	5	4	2	2	3	3	5	4	41.4	41.4	41.4	15.154	133	133	0	31.312	By MS/MS	By MS/MS	By MS/MS	By MS/MS	By MS/MS	By MS/MS	12.8	13.5	20.3	20.3	41.4	34.6
P0A7G6	P0A7G6	12	12	12	Protein RecA	recA	sp|P0A7G6|RECA_ECOLI Protein RecA OS=Escherichia coli (strain K12) OX=83333 GN=recA PE=1 SV=2	1	12	12	12	8	4	5	11	11	10	8	4	5	11	11	10	8	4	5	11	11	10	49.3	49.3	49.3	37.973	353	353	0	323.31	By MS/MS	By MS/MS	By MS/MS	By MS/MS	By MS/MS	By MS/MS	31.7	14.7	18.4	47	45.6	43.3
P0A7H0	P0A7H0	1	1	1	DNA replication and repair protein RecF	recF	sp|P0A7H0|RECF_ECOLI DNA replication and repair protein RecF OS=Escherichia coli (strain K12) OX=83333 GN=recF PE=1 SV=2	1	1	1	1	0	0	0	0	1	0	0	0	0	0	1	0	0	0	0	0	1	0	3.4	3.4	3.4	40.514	357	357	0.0054422	2.9709					By MS/MS		0	0	0	0	3.4	0
P0A7I0	P0A7I0	10	10	10	Peptide chain release factor 1	prfA	sp|P0A7I0|RF1_ECOLI Peptide chain release factor RF1 OS=Escherichia coli (strain K12) OX=83333 GN=prfA PE=1 SV=1	1	10	10	10	2	1	0	8	8	7	2	1	0	8	8	7	2	1	0	8	8	7	31.9	31.9	31.9	40.517	360	360	0	85.028	By matching	By matching		By MS/MS	By MS/MS	By MS/MS	6.4	4.2	0	25.3	25.6	25
P0A7I4	P0A7I4	18	18	18	Peptide chain release factor 3	prfC	sp|P0A7I4|RF3_ECOLI Peptide chain release factor RF3 OS=Escherichia coli (strain K12) OX=83333 GN=prfC PE=1 SV=2	1	18	18	18	6	8	6	12	15	17	6	8	6	12	15	17	6	8	6	12	15	17	49.5	49.5	49.5	59.573	529	529	0	151.64	By MS/MS	By MS/MS	By MS/MS	By MS/MS	By MS/MS	By MS/MS	14.6	20.6	17.8	28.5	36.9	48.2
P0A7I7	P0A7I7	4	4	4	GTP cyclohydrolase-2	ribA	sp|P0A7I7|RIBA_ECOLI GTP cyclohydrolase-2 OS=Escherichia coli (strain K12) OX=83333 GN=ribA PE=1 SV=1	1	4	4	4	0	1	2	1	4	3	0	1	2	1	4	3	0	1	2	1	4	3	27.6	27.6	27.6	21.836	196	196	0	8.5702		By MS/MS	By matching	By MS/MS	By MS/MS	By MS/MS	0	4.1	9.2	5.1	27.6	14.8
P0A7J0	P0A7J0	13	13	13	3,4-dihydroxy-2-butanone 4-phosphate synthase	ribB	sp|P0A7J0|RIBB_ECOLI 3,4-dihydroxy-2-butanone 4-phosphate synthase OS=Escherichia coli (strain K12) OX=83333 GN=ribB PE=1 SV=1	1	13	13	13	5	5	4	12	13	13	5	5	4	12	13	13	5	5	4	12	13	13	70.5	70.5	70.5	23.353	217	217	0	264.84	By MS/MS	By MS/MS	By MS/MS	By MS/MS	By MS/MS	By MS/MS	29	27.6	23	59.9	70.5	70.5
P0A7J3	P0A7J3	8	8	8	50S ribosomal protein L10	rplJ	sp|P0A7J3|RL10_ECOLI 50S ribosomal protein L10 OS=Escherichia coli (strain K12) OX=83333 GN=rplJ PE=1 SV=2	1	8	8	8	8	8	7	8	8	7	8	8	7	8	8	7	8	8	7	8	8	7	59.4	59.4	59.4	17.711	165	165	0	97.76	By MS/MS	By MS/MS	By MS/MS	By MS/MS	By MS/MS	By MS/MS	59.4	59.4	46.7	59.4	59.4	46.7
P0A7J7	P0A7J7	6	6	6	50S ribosomal protein L11	rplK	sp|P0A7J7|RL11_ECOLI 50S ribosomal protein L11 OS=Escherichia coli (strain K12) OX=83333 GN=rplK PE=1 SV=2	1	6	6	6	6	6	6	6	6	6	6	6	6	6	6	6	6	6	6	6	6	6	43.7	43.7	43.7	14.875	142	142	0	66.967	By MS/MS	By MS/MS	By MS/MS	By MS/MS	By MS/MS	By MS/MS	43.7	43.7	43.7	43.7	43.7	43.7
P0A7K2	P0A7K2	4	4	4	50S ribosomal protein L7/L12	rplL	sp|P0A7K2|RL7_ECOLI 50S ribosomal protein L7/L12 OS=Escherichia coli (strain K12) OX=83333 GN=rplL PE=1 SV=2	1	4	4	4	4	4	4	4	4	4	4	4	4	4	4	4	4	4	4	4	4	4	43.8	43.8	43.8	12.295	121	121	0	33.875	By MS/MS	By MS/MS	By MS/MS	By MS/MS	By MS/MS	By MS/MS	43.8	43.8	43.8	43.8	43.8	43.8
P0A7K6	P0A7K6	9	9	9	50S ribosomal protein L19	rplS	sp|P0A7K6|RL19_ECOLI 50S ribosomal protein L19 OS=Escherichia coli (strain K12) OX=83333 GN=rplS PE=1 SV=2	1	9	9	9	9	7	8	9	7	7	9	7	8	9	7	7	9	7	8	9	7	7	66.1	66.1	66.1	13.133	115	115	0	128.28	By MS/MS	By MS/MS	By MS/MS	By MS/MS	By MS/MS	By MS/MS	66.1	58.3	58.3	66.1	58.3	58.3
P0A7L0	P0A7L0	12	12	12	50S ribosomal protein L1	rplA	sp|P0A7L0|RL1_ECOLI 50S ribosomal protein L1 OS=Escherichia coli (strain K12) OX=83333 GN=rplA PE=1 SV=2	1	12	12	12	11	11	10	11	12	11	11	11	10	11	12	11	11	11	10	11	12	11	53	53	53	24.729	234	234	0	185.58	By MS/MS	By MS/MS	By MS/MS	By MS/MS	By MS/MS	By MS/MS	53	47.4	52.6	53	53	53
P0A7L3	P0A7L3	6	6	6	50S ribosomal protein L20	rplT	sp|P0A7L3|RL20_ECOLI 50S ribosomal protein L20 OS=Escherichia coli (strain K12) OX=83333 GN=rplT PE=1 SV=2	1	6	6	6	6	6	6	6	6	6	6	6	6	6	6	6	6	6	6	6	6	6	42.4	42.4	42.4	13.497	118	118	0	21.334	By MS/MS	By MS/MS	By MS/MS	By MS/MS	By MS/MS	By MS/MS	42.4	42.4	42.4	42.4	42.4	42.4
P0A7L8	P0A7L8	4	4	4	50S ribosomal protein L27	rpmA	sp|P0A7L8|RL27_ECOLI 50S ribosomal protein L27 OS=Escherichia coli (strain K12) OX=83333 GN=rpmA PE=1 SV=2	1	4	4	4	3	2	3	4	3	3	3	2	3	4	3	3	3	2	3	4	3	3	45.9	45.9	45.9	9.1244	85	85	0	32.221	By MS/MS	By MS/MS	By MS/MS	By MS/MS	By MS/MS	By MS/MS	37.6	24.7	37.6	45.9	37.6	37.6
P0A7M2	P0A7M2	4	4	4	50S ribosomal protein L28	rpmB	sp|P0A7M2|RL28_ECOLI 50S ribosomal protein L28 OS=Escherichia coli (strain K12) OX=83333 GN=rpmB PE=1 SV=2	1	4	4	4	4	3	4	4	3	4	4	3	4	4	3	4	4	3	4	4	3	4	34.6	34.6	34.6	9.0064	78	78	0	19.213	By MS/MS	By MS/MS	By MS/MS	By MS/MS	By MS/MS	By MS/MS	34.6	23.1	34.6	34.6	23.1	34.6
P0A7M6	P0A7M6	2	2	2	50S ribosomal protein L29	rpmC	sp|P0A7M6|RL29_ECOLI 50S ribosomal protein L29 OS=Escherichia coli (strain K12) OX=83333 GN=rpmC PE=1 SV=1	1	2	2	2	2	2	2	2	2	2	2	2	2	2	2	2	2	2	2	2	2	2	46	46	46	7.2734	63	63	0	126.55	By MS/MS	By MS/MS	By MS/MS	By MS/MS	By MS/MS	By MS/MS	46	46	46	46	46	46
P0A7M9	P0A7M9	3	3	3	50S ribosomal protein L31	rpmE	sp|P0A7M9|RL31_ECOLI 50S ribosomal protein L31 OS=Escherichia coli (strain K12) OX=83333 GN=rpmE PE=1 SV=1	1	3	3	3	3	2	3	3	3	3	3	2	3	3	3	3	3	2	3	3	3	3	52.9	52.9	52.9	7.871	70	70	0	37.431	By MS/MS	By MS/MS	By MS/MS	By MS/MS	By MS/MS	By MS/MS	52.9	31.4	52.9	52.9	52.9	52.9
P0A7N4	P0A7N4	2	2	2	50S ribosomal protein L32	rpmF	sp|P0A7N4|RL32_ECOLI 50S ribosomal protein L32 OS=Escherichia coli (strain K12) OX=83333 GN=rpmF PE=1 SV=2	1	2	2	2	2	2	2	2	2	2	2	2	2	2	2	2	2	2	2	2	2	2	43.9	43.9	43.9	6.4463	57	57	0	184.09	By MS/MS	By MS/MS	By MS/MS	By MS/MS	By MS/MS	By MS/MS	43.9	43.9	43.9	43.9	43.9	43.9
P0A7N9	P0A7N9	1	1	1	50S ribosomal protein L33	rpmG	sp|P0A7N9|RL33_ECOLI 50S ribosomal protein L33 OS=Escherichia coli (strain K12) OX=83333 GN=rpmG PE=1 SV=2	1	1	1	1	1	1	1	1	1	0	1	1	1	1	1	0	1	1	1	1	1	0	27.3	27.3	27.3	6.3715	55	55	0	45.821	By MS/MS	By MS/MS	By MS/MS	By MS/MS	By MS/MS		27.3	27.3	27.3	27.3	27.3	0
P0A7P5	P0A7P5	2	2	2	50S ribosomal protein L34	rpmH	sp|P0A7P5|RL34_ECOLI 50S ribosomal protein L34 OS=Escherichia coli (strain K12) OX=83333 GN=rpmH PE=1 SV=1	1	2	2	2	2	2	2	2	2	2	2	2	2	2	2	2	2	2	2	2	2	2	19.6	19.6	19.6	5.3803	46	46	0	6.792	By MS/MS	By MS/MS	By MS/MS	By MS/MS	By MS/MS	By MS/MS	19.6	19.6	19.6	19.6	19.6	19.6
P0A7Q1	P0A7Q1	1	1	1	50S ribosomal protein L35	rpmI	sp|P0A7Q1|RL35_ECOLI 50S ribosomal protein L35 OS=Escherichia coli (strain K12) OX=83333 GN=rpmI PE=1 SV=2	1	1	1	1	1	1	1	1	1	1	1	1	1	1	1	1	1	1	1	1	1	1	20	20	20	7.2888	65	65	0	13.699	By MS/MS	By MS/MS	By MS/MS	By MS/MS	By MS/MS	By MS/MS	20	20	20	20	20	20
P0A7Q6	P0A7Q6	1	1	1	50S ribosomal protein L36	rpmJ	sp|P0A7Q6|RL36_ECOLI 50S ribosomal protein L36 OS=Escherichia coli (strain K12) OX=83333 GN=rpmJ PE=1 SV=1	1	1	1	1	1	0	1	1	1	1	1	0	1	1	1	1	1	0	1	1	1	1	21.1	21.1	21.1	4.3643	38	38	0.0066578	2.6669	By MS/MS		By MS/MS	By MS/MS	By MS/MS	By MS/MS	21.1	0	21.1	21.1	21.1	21.1
P0A7R1	P0A7R1	10	10	10	50S ribosomal protein L9	rplI	sp|P0A7R1|RL9_ECOLI 50S ribosomal protein L9 OS=Escherichia coli (strain K12) OX=83333 GN=rplI PE=1 SV=1	1	10	10	10	9	9	10	8	10	10	9	9	10	8	10	10	9	9	10	8	10	10	73.8	73.8	73.8	15.769	149	149	0	74.933	By MS/MS	By MS/MS	By MS/MS	By MS/MS	By MS/MS	By MS/MS	68.5	68.5	73.8	54.4	73.8	73.8
P0A7R5	P0A7R5	7	7	7	30S ribosomal protein S10	rpsJ	sp|P0A7R5|RS10_ECOLI 30S ribosomal protein S10 OS=Escherichia coli (strain K12) OX=83333 GN=rpsJ PE=1 SV=1	1	7	7	7	6	5	5	7	6	6	6	5	5	7	6	6	6	5	5	7	6	6	63.1	63.1	63.1	11.735	103	103	0	100.89	By MS/MS	By MS/MS	By MS/MS	By MS/MS	By MS/MS	By MS/MS	49.5	48.5	48.5	63.1	49.5	49.5
P0A7R9	P0A7R9	5	5	5	30S ribosomal protein S11	rpsK	sp|P0A7R9|RS11_ECOLI 30S ribosomal protein S11 OS=Escherichia coli (strain K12) OX=83333 GN=rpsK PE=1 SV=2	1	5	5	5	5	5	5	5	5	5	5	5	5	5	5	5	5	5	5	5	5	5	51.2	51.2	51.2	13.845	129	129	0	78.988	By MS/MS	By MS/MS	By MS/MS	By MS/MS	By MS/MS	By MS/MS	51.2	51.2	51.2	51.2	51.2	51.2
P0A7S3	P0A7S3	5	5	5	30S ribosomal protein S12	rpsL	sp|P0A7S3|RS12_ECOLI 30S ribosomal protein S12 OS=Escherichia coli (strain K12) OX=83333 GN=rpsL PE=1 SV=2	1	5	5	5	5	4	5	5	5	5	5	4	5	5	5	5	5	4	5	5	5	5	50.8	50.8	50.8	13.737	124	124	0	20.216	By MS/MS	By MS/MS	By MS/MS	By MS/MS	By MS/MS	By MS/MS	50.8	29	50.8	50.8	50.8	50.8
P0A7S9	P0A7S9	9	9	9	30S ribosomal protein S13	rpsM	sp|P0A7S9|RS13_ECOLI 30S ribosomal protein S13 OS=Escherichia coli (strain K12) OX=83333 GN=rpsM PE=1 SV=2	1	9	9	9	7	8	8	8	8	8	7	8	8	8	8	8	7	8	8	8	8	8	66.9	66.9	66.9	13.099	118	118	0	186.04	By MS/MS	By MS/MS	By MS/MS	By MS/MS	By MS/MS	By MS/MS	59.3	58.5	66.1	66.1	60.2	66.1
P0A7T3	P0A7T3	3	3	3	30S ribosomal protein S16	rpsP	sp|P0A7T3|RS16_ECOLI 30S ribosomal protein S16 OS=Escherichia coli (strain K12) OX=83333 GN=rpsP PE=1 SV=1	1	3	3	3	3	2	3	3	3	3	3	2	3	3	3	3	3	2	3	3	3	3	45.1	45.1	45.1	9.1904	82	82	0	26.821	By MS/MS	By MS/MS	By MS/MS	By MS/MS	By MS/MS	By MS/MS	45.1	28	45.1	45.1	45.1	45.1
P0A7T7	P0A7T7	3	3	3	30S ribosomal protein S18	rpsR	sp|P0A7T7|RS18_ECOLI 30S ribosomal protein S18 OS=Escherichia coli (strain K12) OX=83333 GN=rpsR PE=1 SV=2	1	3	3	3	3	3	3	3	3	3	3	3	3	3	3	3	3	3	3	3	3	3	40	40	40	8.9863	75	75	0	40.278	By MS/MS	By MS/MS	By MS/MS	By MS/MS	By MS/MS	By MS/MS	40	40	40	40	40	40
P0A7U3	P0A7U3	5	5	5	30S ribosomal protein S19	rpsS	sp|P0A7U3|RS19_ECOLI 30S ribosomal protein S19 OS=Escherichia coli (strain K12) OX=83333 GN=rpsS PE=1 SV=2	1	5	5	5	5	5	3	4	3	4	5	5	3	4	3	4	5	5	3	4	3	4	56.5	56.5	56.5	10.43	92	92	0	67.376	By MS/MS	By MS/MS	By MS/MS	By MS/MS	By MS/MS	By MS/MS	56.5	56.5	35.9	37	35.9	37
P0A7U7	P0A7U7	3	3	3	30S ribosomal protein S20	rpsT	sp|P0A7U7|RS20_ECOLI 30S ribosomal protein S20 OS=Escherichia coli (strain K12) OX=83333 GN=rpsT PE=1 SV=2	1	3	3	3	3	3	3	3	3	3	3	3	3	3	3	3	3	3	3	3	3	3	34.5	34.5	34.5	9.6843	87	87	0	44.916	By MS/MS	By MS/MS	By MS/MS	By MS/MS	By MS/MS	By MS/MS	34.5	34.5	34.5	34.5	34.5	34.5
P0A7V0	P0A7V0	13	13	13	30S ribosomal protein S2	rpsB	sp|P0A7V0|RS2_ECOLI 30S ribosomal protein S2 OS=Escherichia coli (strain K12) OX=83333 GN=rpsB PE=1 SV=2	1	13	13	13	12	10	10	13	13	12	12	10	10	13	13	12	12	10	10	13	13	12	71.8	71.8	71.8	26.743	241	241	0	323.31	By MS/MS	By MS/MS	By MS/MS	By MS/MS	By MS/MS	By MS/MS	71.8	63.9	63.9	71.8	71.8	71
P0A7V3	P0A7V3	11	11	11	30S ribosomal protein S3	rpsC	sp|P0A7V3|RS3_ECOLI 30S ribosomal protein S3 OS=Escherichia coli (strain K12) OX=83333 GN=rpsC PE=1 SV=2	1	11	11	11	10	11	10	11	11	9	10	11	10	11	11	9	10	11	10	11	11	9	54.5	54.5	54.5	25.983	233	233	0	314.05	By MS/MS	By MS/MS	By MS/MS	By MS/MS	By MS/MS	By MS/MS	54.5	54.5	48.5	54.5	54.5	46.4
P0A7V8	P0A7V8	11	11	11	30S ribosomal protein S4	rpsD	sp|P0A7V8|RS4_ECOLI 30S ribosomal protein S4 OS=Escherichia coli (strain K12) OX=83333 GN=rpsD PE=1 SV=2	1	11	11	11	10	10	11	10	11	9	10	10	11	10	11	9	10	10	11	10	11	9	55.3	55.3	55.3	23.469	206	206	0	184.68	By MS/MS	By MS/MS	By MS/MS	By MS/MS	By MS/MS	By MS/MS	54.9	54.9	55.3	54.9	55.3	46.1
P0A7W1	P0A7W1	8	8	8	30S ribosomal protein S5	rpsE	sp|P0A7W1|RS5_ECOLI 30S ribosomal protein S5 OS=Escherichia coli (strain K12) OX=83333 GN=rpsE PE=1 SV=2	1	8	8	8	8	8	8	8	8	8	8	8	8	8	8	8	8	8	8	8	8	8	67.1	67.1	67.1	17.603	167	167	0	323.31	By MS/MS	By MS/MS	By MS/MS	By MS/MS	By MS/MS	By MS/MS	67.1	67.1	67.1	67.1	67.1	67.1
P0A7W7	P0A7W7	8	8	8	30S ribosomal protein S8	rpsH	sp|P0A7W7|RS8_ECOLI 30S ribosomal protein S8 OS=Escherichia coli (strain K12) OX=83333 GN=rpsH PE=1 SV=2	1	8	8	8	8	7	8	8	8	8	8	7	8	8	8	8	8	7	8	8	8	8	66.9	66.9	66.9	14.126	130	130	0	97.327	By MS/MS	By MS/MS	By MS/MS	By MS/MS	By MS/MS	By MS/MS	66.9	57.7	66.9	66.9	66.9	66.9
P0A7X3	P0A7X3	6	6	6	30S ribosomal protein S9	rpsI	sp|P0A7X3|RS9_ECOLI 30S ribosomal protein S9 OS=Escherichia coli (strain K12) OX=83333 GN=rpsI PE=1 SV=2	1	6	6	6	6	6	6	6	6	6	6	6	6	6	6	6	6	6	6	6	6	6	45.4	45.4	45.4	14.856	130	130	0	38.954	By MS/MS	By MS/MS	By MS/MS	By MS/MS	By MS/MS	By MS/MS	45.4	45.4	45.4	45.4	45.4	45.4
P0A7X6	P0A7X6	3	3	3	Ribosome maturation factor RimM	rimM	sp|P0A7X6|RIMM_ECOLI Ribosome maturation factor RimM OS=Escherichia coli (strain K12) OX=83333 GN=rimM PE=1 SV=1	1	3	3	3	2	1	1	2	3	1	2	1	1	2	3	1	2	1	1	2	3	1	18.7	18.7	18.7	20.605	182	182	0	19.028	By MS/MS	By matching	By MS/MS	By MS/MS	By MS/MS	By matching	13.2	6	6	13.2	18.7	6
P0A7Y0	P0A7Y0	10	10	10	Ribonuclease 3	rnc	sp|P0A7Y0|RNC_ECOLI Ribonuclease 3 OS=Escherichia coli (strain K12) OX=83333 GN=rnc PE=1 SV=1	1	10	10	10	5	3	4	8	7	6	5	3	4	8	7	6	5	3	4	8	7	6	54	54	54	25.55	226	226	0	54.322	By MS/MS	By MS/MS	By MS/MS	By MS/MS	By MS/MS	By MS/MS	22.6	11.9	16.8	46.5	36.7	32.7
P0A7Y8	P0A7Y8	2	2	2	Ribonuclease P protein component	rnpA	sp|P0A7Y8|RNPA_ECOLI Ribonuclease P protein component OS=Escherichia coli (strain K12) OX=83333 GN=rnpA PE=1 SV=1	1	2	2	2	1	1	2	1	0	2	1	1	2	1	0	2	1	1	2	1	0	2	22.7	22.7	22.7	13.789	119	119	0.0021023	3.3904	By MS/MS	By MS/MS	By MS/MS	By MS/MS		By MS/MS	13.4	9.2	22.7	9.2	0	22.7
P0A7Z0	P0A7Z0	4	4	4	Ribose-5-phosphate isomerase A	rpiA	sp|P0A7Z0|RPIA_ECOLI Ribose-5-phosphate isomerase A OS=Escherichia coli (strain K12) OX=83333 GN=rpiA PE=1 SV=1	1	4	4	4	3	3	2	3	4	4	3	3	2	3	4	4	3	3	2	3	4	4	22.8	22.8	22.8	22.86	219	219	0	22.151	By MS/MS	By MS/MS	By MS/MS	By MS/MS	By MS/MS	By MS/MS	17.4	17.4	13.7	17.4	22.8	22.8
P0A7Z4	P0A7Z4	19	19	19	DNA-directed RNA polymerase subunit alpha	rpoA	sp|P0A7Z4|RPOA_ECOLI DNA-directed RNA polymerase subunit alpha OS=Escherichia coli (strain K12) OX=83333 GN=rpoA PE=1 SV=1	1	19	19	19	17	14	13	16	18	15	17	14	13	16	18	15	17	14	13	16	18	15	79.6	79.6	79.6	36.511	329	329	0	323.31	By MS/MS	By MS/MS	By MS/MS	By MS/MS	By MS/MS	By MS/MS	76	52.9	57.1	68.4	76.3	62
P0A800	P0A800	2	2	2	DNA-directed RNA polymerase subunit omega	rpoZ	sp|P0A800|RPOZ_ECOLI DNA-directed RNA polymerase subunit omega OS=Escherichia coli (strain K12) OX=83333 GN=rpoZ PE=1 SV=1	1	2	2	2	0	0	1	2	1	2	0	0	1	2	1	2	0	0	1	2	1	2	26.4	26.4	26.4	10.236	91	91	0	17.275			By matching	By MS/MS	By MS/MS	By matching	0	0	9.9	26.4	9.9	26.4
P0A805	P0A805	7	7	7	Ribosome-recycling factor	frr	sp|P0A805|RRF_ECOLI Ribosome-recycling factor OS=Escherichia coli (strain K12) OX=83333 GN=frr PE=1 SV=1	1	7	7	7	5	5	6	6	7	6	5	5	6	6	7	6	5	5	6	6	7	6	45.4	45.4	45.4	20.638	185	185	0	185.19	By MS/MS	By MS/MS	By MS/MS	By MS/MS	By MS/MS	By MS/MS	37.3	37.3	41.6	41.1	45.4	41.6
P0A812	P0A812	8	8	8	Holliday junction ATP-dependent DNA helicase RuvB	ruvB	sp|P0A812|RUVB_ECOLI Holliday junction ATP-dependent DNA helicase RuvB OS=Escherichia coli (strain K12) OX=83333 GN=ruvB PE=1 SV=1	1	8	8	8	0	0	2	7	5	6	0	0	2	7	5	6	0	0	2	7	5	6	29.5	29.5	29.5	37.173	336	336	0	31.847			By MS/MS	By MS/MS	By MS/MS	By MS/MS	0	0	7.1	26.8	17.9	23.5
P0A817	P0A817	16	16	16	S-adenosylmethionine synthase	metK	sp|P0A817|METK_ECOLI S-adenosylmethionine synthase OS=Escherichia coli (strain K12) OX=83333 GN=metK PE=1 SV=2	1	16	16	16	11	10	9	14	14	13	11	10	9	14	14	13	11	10	9	14	14	13	56.5	56.5	56.5	41.951	384	384	0	187.45	By MS/MS	By MS/MS	By MS/MS	By MS/MS	By MS/MS	By MS/MS	37.5	31.5	31	48.7	47.7	46.9
P0A821	P0A821	6	6	6	L-seryl-tRNA(Sec) selenium transferase	selA	sp|P0A821|SELA_ECOLI L-seryl-tRNA(Sec) selenium transferase OS=Escherichia coli (strain K12) OX=83333 GN=selA PE=1 SV=1	1	6	6	6	1	4	0	3	4	1	1	4	0	3	4	1	1	4	0	3	4	1	14.9	14.9	14.9	50.607	463	463	0	12.327	By MS/MS	By matching		By MS/MS	By MS/MS	By MS/MS	2.4	10.2	0	7.1	10.2	2.4
P0A825	P0A825	17	17	17	Serine hydroxymethyltransferase	glyA	sp|P0A825|GLYA_ECOLI Serine hydroxymethyltransferase OS=Escherichia coli (strain K12) OX=83333 GN=glyA PE=1 SV=1	1	17	17	17	12	12	12	15	15	15	12	12	12	15	15	15	12	12	12	15	15	15	55.2	55.2	55.2	45.316	417	417	0	323.31	By MS/MS	By MS/MS	By MS/MS	By MS/MS	By MS/MS	By MS/MS	33.8	31.2	38.4	48.4	48.2	51.6
P0A830	P0A830	4	4	4	Aerobic C4-dicarboxylate transport protein	dctA	sp|P0A830|DCTA_ECOLI Aerobic C4-dicarboxylate transport protein OS=Escherichia coli (strain K12) OX=83333 GN=dctA PE=1 SV=1	1	4	4	4	4	3	3	4	4	4	4	3	3	4	4	4	4	3	3	4	4	4	10	10	10	45.436	428	428	0	17.788	By MS/MS	By MS/MS	By MS/MS	By MS/MS	By MS/MS	By MS/MS	10	7.7	8.2	10	10	10
P0A832	P0A832	3	3	3	SsrA-binding protein	smpB	sp|P0A832|SSRP_ECOLI SsrA-binding protein OS=Escherichia coli (strain K12) OX=83333 GN=smpB PE=1 SV=2	1	3	3	3	3	3	3	3	2	3	3	3	3	3	2	3	3	3	3	3	2	3	18.1	18.1	18.1	18.269	160	160	0	12.497	By MS/MS	By MS/MS	By MS/MS	By MS/MS	By MS/MS	By MS/MS	18.1	18.1	18.1	18.1	11.9	18.1
P0A836	P0A836	20	20	20	Succinyl-CoA ligase [ADP-forming] subunit beta	sucC	sp|P0A836|SUCC_ECOLI Succinate--CoA ligase [ADP-forming] subunit beta OS=Escherichia coli (strain K12) OX=83333 GN=sucC PE=1 SV=1	1	20	20	20	14	12	11	18	18	20	14	12	11	18	18	20	14	12	11	18	18	20	66.2	66.2	66.2	41.392	388	388	0	323.31	By MS/MS	By MS/MS	By MS/MS	By MS/MS	By MS/MS	By MS/MS	38.7	41.8	35.3	57	57.7	66.2
P0A840	P0A840	1	1	1	5/3-nucleotidase SurE	surE	sp|P0A840|SURE_ECOLI 5/3-nucleotidase SurE OS=Escherichia coli (strain K12) OX=83333 GN=surE PE=1 SV=1	1	1	1	1	0	0	0	0	1	0	0	0	0	0	1	0	0	0	0	0	1	0	7.5	7.5	7.5	26.9	253	253	0.0060322	2.774					By MS/MS		0	0	0	0	7.5	0
P0A847	P0A847	12	12	12	Queuine tRNA-ribosyltransferase	tgt	sp|P0A847|TGT_ECOLI Queuine tRNA-ribosyltransferase OS=Escherichia coli (strain K12) OX=83333 GN=tgt PE=1 SV=1	1	12	12	12	5	3	1	9	7	9	5	3	1	9	7	9	5	3	1	9	7	9	39.2	39.2	39.2	42.593	375	375	0	61.088	By MS/MS	By MS/MS	By matching	By MS/MS	By MS/MS	By MS/MS	13.3	8.8	2.4	28.5	24.3	29.6
P0A850	P0A850	26	26	26	Trigger factor	tig	sp|P0A850|TIG_ECOLI Trigger factor OS=Escherichia coli (strain K12) OX=83333 GN=tig PE=1 SV=1	1	26	26	26	23	21	19	25	24	25	23	21	19	25	24	25	23	21	19	25	24	25	67.8	67.8	67.8	48.192	432	432	0	323.31	By MS/MS	By MS/MS	By MS/MS	By MS/MS	By MS/MS	By MS/MS	61.3	54.4	51.6	63.7	61.6	67.6
P0A853	P0A853	25	25	25	Tryptophanase	tnaA	sp|P0A853|TNAA_ECOLI Tryptophanase OS=Escherichia coli (strain K12) OX=83333 GN=tnaA PE=1 SV=1	1	25	25	25	22	21	21	25	25	24	22	21	21	25	25	24	22	21	21	25	25	24	73	73	73	52.773	471	471	0	323.31	By MS/MS	By MS/MS	By MS/MS	By MS/MS	By MS/MS	By MS/MS	64.5	64.5	61.4	73	73	71.1
P0A855	P0A855	10	10	10	Protein TolB	tolB	sp|P0A855|TOLB_ECOLI Tol-Pal system protein TolB OS=Escherichia coli (strain K12) OX=83333 GN=tolB PE=1 SV=1	1	10	10	10	6	5	5	5	10	7	6	5	5	5	10	7	6	5	5	5	10	7	34	34	34	45.955	430	430	0	38.568	By MS/MS	By matching	By matching	By MS/MS	By MS/MS	By MS/MS	17.2	17.4	13.7	14	34	22.8
P0A858	P0A858	8	8	8	Triosephosphate isomerase	tpiA	sp|P0A858|TPIS_ECOLI Triosephosphate isomerase OS=Escherichia coli (strain K12) OX=83333 GN=tpiA PE=1 SV=1	1	8	8	8	5	5	6	7	6	7	5	5	6	7	6	7	5	5	6	7	6	7	47.1	47.1	47.1	26.972	255	255	0	119.43	By MS/MS	By MS/MS	By MS/MS	By MS/MS	By MS/MS	By MS/MS	31.4	31.4	34.5	43.9	35.3	43.5
P0A862	P0A862	7	7	7	Thiol peroxidase	tpx	sp|P0A862|TPX_ECOLI Thiol peroxidase OS=Escherichia coli (strain K12) OX=83333 GN=tpx PE=1 SV=2	1	7	7	7	5	6	5	7	7	7	5	6	5	7	7	7	5	6	5	7	7	7	78.6	78.6	78.6	17.835	168	168	0	323.31	By MS/MS	By MS/MS	By MS/MS	By MS/MS	By MS/MS	By MS/MS	44.6	58.3	44.6	78.6	78.6	78.6
P0A867	P0A867	11	10	10	Transaldolase A	talA	sp|P0A867|TALA_ECOLI Transaldolase A OS=Escherichia coli (strain K12) OX=83333 GN=talA PE=3 SV=1	1	11	10	10	4	3	3	8	8	7	3	2	2	7	7	6	3	2	2	7	7	6	39.2	34.2	34.2	35.658	316	316	0	19.358	By MS/MS	By matching	By matching	By MS/MS	By MS/MS	By MS/MS	13.9	9.8	11.4	31	24.4	25
P0A870	P0A870	17	17	16	Transaldolase B	talB	sp|P0A870|TALB_ECOLI Transaldolase B OS=Escherichia coli (strain K12) OX=83333 GN=talB PE=1 SV=2	1	17	17	16	14	15	15	16	15	17	14	15	15	16	15	17	13	14	14	15	14	16	69.4	69.4	64.4	35.219	317	317	0	251.69	By MS/MS	By MS/MS	By MS/MS	By MS/MS	By MS/MS	By MS/MS	57.7	61.5	59	66.9	63.1	69.4
P0A873	P0A873	4	4	4	tRNA (guanine-N(1)-)-methyltransferase	trmD	sp|P0A873|TRMD_ECOLI tRNA (guanine-N(1)-)-methyltransferase OS=Escherichia coli (strain K12) OX=83333 GN=trmD PE=1 SV=1	1	4	4	4	1	2	1	1	3	2	1	2	1	1	3	2	1	2	1	1	3	2	18.4	18.4	18.4	28.422	255	255	0	11.034	By matching	By MS/MS	By matching	By MS/MS	By MS/MS	By MS/MS	6.3	6.7	2.7	6.3	14.5	8.2
P0A877	P0A877	6	6	6	Tryptophan synthase alpha chain	trpA	sp|P0A877|TRPA_ECOLI Tryptophan synthase alpha chain OS=Escherichia coli (strain K12) OX=83333 GN=trpA PE=1 SV=1	1	6	6	6	0	0	0	4	5	4	0	0	0	4	5	4	0	0	0	4	5	4	32.8	32.8	32.8	28.724	268	268	0	40.059				By MS/MS	By MS/MS	By MS/MS	0	0	0	26.5	28.7	25.7
P0A879	P0A879	13	13	13	Tryptophan synthase beta chain	trpB	sp|P0A879|TRPB_ECOLI Tryptophan synthase beta chain OS=Escherichia coli (strain K12) OX=83333 GN=trpB PE=1 SV=2	1	13	13	13	2	1	0	12	10	9	2	1	0	12	10	9	2	1	0	12	10	9	41.6	41.6	41.6	42.983	397	397	0	114.97	By matching	By matching		By MS/MS	By MS/MS	By MS/MS	5.8	3.8	0	38.3	34	27.7
P0A884	P0A884	7	7	7	Thymidylate synthase	thyA	sp|P0A884|TYSY_ECOLI Thymidylate synthase OS=Escherichia coli (strain K12) OX=83333 GN=thyA PE=1 SV=1	1	7	7	7	3	1	2	4	5	1	3	1	2	4	5	1	3	1	2	4	5	1	30.7	30.7	30.7	30.479	264	264	0	19.288	By MS/MS	By MS/MS	By matching	By MS/MS	By MS/MS	By MS/MS	15.9	4.9	9.8	17.8	22	4.9
P0A887	P0A887	11	11	11	Ubiquinone/menaquinone biosynthesis C-methyltransferase UbiE	ubiE	sp|P0A887|UBIE_ECOLI Ubiquinone/menaquinone biosynthesis C-methyltransferase UbiE OS=Escherichia coli (strain K12) OX=83333 GN=ubiE PE=1 SV=1	1	11	11	11	7	3	3	11	10	9	7	3	3	11	10	9	7	3	3	11	10	9	59	59	59	28.073	251	251	0	93.613	By MS/MS	By MS/MS	By MS/MS	By MS/MS	By MS/MS	By MS/MS	34.3	12.7	13.5	59	55.4	42.6
P0A894	P0A894	7	7	7	RNase adapter protein RapZ	rapZ	sp|P0A894|RAPZ_ECOLI RNase adapter protein RapZ OS=Escherichia coli (strain K12) OX=83333 GN=rapZ PE=1 SV=1	1	7	7	7	0	1	0	7	4	4	0	1	0	7	4	4	0	1	0	7	4	4	34.9	34.9	34.9	32.492	284	284	0	62.823		By matching		By MS/MS	By MS/MS	By MS/MS	0	3.2	0	34.9	20.8	20.8
P0A8A0	P0A8A0	7	7	7	Probable transcriptional regulatory protein YebC	yebC	sp|P0A8A0|YEBC_ECOLI Probable transcriptional regulatory protein YebC OS=Escherichia coli (strain K12) OX=83333 GN=yebC PE=1 SV=1	1	7	7	7	6	3	5	6	6	6	6	3	5	6	6	6	6	3	5	6	6	6	30.9	30.9	30.9	26.422	246	246	0	40.356	By MS/MS	By MS/MS	By MS/MS	By MS/MS	By MS/MS	By MS/MS	27.6	16.7	24.4	27.6	27.2	27.6
P0A8A2	P0A8A2	4	4	4	Probable transcriptional regulatory protein YeeN	yeeN	sp|P0A8A2|YEEN_ECOLI Probable transcriptional regulatory protein YeeN OS=Escherichia coli (strain K12) OX=83333 GN=yeeN PE=1 SV=1	1	4	4	4	3	3	2	3	2	3	3	3	2	3	2	3	3	3	2	3	2	3	22.7	22.7	22.7	25.867	238	238	0	20.422	By MS/MS	By MS/MS	By MS/MS	By MS/MS	By MS/MS	By MS/MS	13.4	19.3	10.1	13.4	13.9	13.4
P0A8A4	P0A8A4	6	6	6	Phosphoenolpyruvate synthase regulatory protein	ppsR	sp|P0A8A4|PSRP_ECOLI Phosphoenolpyruvate synthase regulatory protein OS=Escherichia coli (strain K12) OX=83333 GN=ppsR PE=1 SV=1	1	6	6	6	0	0	0	3	6	3	0	0	0	3	6	3	0	0	0	3	6	3	25.6	25.6	25.6	31.211	277	277	0	15.568				By MS/MS	By MS/MS	By MS/MS	0	0	0	11.6	25.6	11.6
P0A8A8	P0A8A8	2	2	2	Ribosome maturation factor RimP	rimP	sp|P0A8A8|RIMP_ECOLI Ribosome maturation factor RimP OS=Escherichia coli (strain K12) OX=83333 GN=rimP PE=1 SV=2	1	2	2	2	2	1	1	2	1	2	2	1	1	2	1	2	2	1	1	2	1	2	14.7	14.7	14.7	16.651	150	150	0	6.9086	By MS/MS	By MS/MS	By MS/MS	By MS/MS	By MS/MS	By MS/MS	14.7	7.3	7.3	14.7	7.3	14.7
P0A8B2	P0A8B2	1	1	1	UPF0115 protein YfcN	yfcN	sp|P0A8B2|YFCN_ECOLI UPF0115 protein YfcN OS=Escherichia coli (strain K12) OX=83333 GN=yfcN PE=3 SV=1	1	1	1	1	0	0	0	1	1	1	0	0	0	1	1	1	0	0	0	1	1	1	14.8	14.8	14.8	21.013	183	183	0	8.5817				By MS/MS	By MS/MS	By MS/MS	0	0	0	14.8	14.8	14.8
P0A8B5	P0A8B5	7	7	6	Nucleoid-associated protein YbaB	ybaB	sp|P0A8B5|YBAB_ECOLI Nucleoid-associated protein YbaB OS=Escherichia coli (strain K12) OX=83333 GN=ybaB PE=1 SV=1	1	7	7	6	5	4	1	5	6	6	5	4	1	5	6	6	5	4	1	5	6	6	75.2	75.2	67.9	12.015	109	109	0	164.96	By MS/MS	By MS/MS	By MS/MS	By MS/MS	By MS/MS	By MS/MS	54.1	54.1	11.9	54.1	67.9	67.9
P0A8C1	P0A8C1	2	2	2	UPF0145 protein YbjQ	ybjQ	sp|P0A8C1|YBJQ_ECOLI UPF0145 protein YbjQ OS=Escherichia coli (strain K12) OX=83333 GN=ybjQ PE=1 SV=1	1	2	2	2	1	2	0	1	2	0	1	2	0	1	2	0	1	2	0	1	2	0	17.8	17.8	17.8	11.437	107	107	0.0060729	2.8779	By MS/MS	By MS/MS		By MS/MS	By MS/MS		6.5	17.8	0	6.5	17.8	0
P0A8C4	P0A8C4	1	1	1	UPF0149 protein YgfB	ygfB	sp|P0A8C4|YGFB_ECOLI UPF0149 protein YgfB OS=Escherichia coli (strain K12) OX=83333 GN=ygfB PE=3 SV=1	1	1	1	1	1	0	1	1	1	1	1	0	1	1	1	1	1	0	1	1	1	1	6.8	6.8	6.8	21.229	192	192	0	30.175	By MS/MS		By MS/MS	By MS/MS	By MS/MS	By MS/MS	6.8	0	6.8	6.8	6.8	6.8
P0A8D0	P0A8D0	4	4	4	Transcriptional repressor NrdR	nrdR	sp|P0A8D0|NRDR_ECOLI Transcriptional repressor NrdR OS=Escherichia coli (strain K12) OX=83333 GN=nrdR PE=1 SV=1	1	4	4	4	1	2	1	4	3	3	1	2	1	4	3	3	1	2	1	4	3	3	25.5	25.5	25.5	17.229	149	149	0	10.38	By matching	By matching	By matching	By MS/MS	By MS/MS	By MS/MS	5.4	11.4	6	25.5	20.1	20.1
P0A8E1	P0A8E1	7	7	7	UPF0227 protein YcfP	ycfP	sp|P0A8E1|YCFP_ECOLI UPF0227 protein YcfP OS=Escherichia coli (strain K12) OX=83333 GN=ycfP PE=1 SV=1	1	7	7	7	3	1	2	3	5	6	3	1	2	3	5	6	3	1	2	3	5	6	47.2	47.2	47.2	21.226	180	180	0	37.239	By MS/MS	By MS/MS	By matching	By MS/MS	By MS/MS	By MS/MS	18.3	6.7	13.9	18.3	33.3	43.3
P0A8E7	P0A8E7	10	10	10	UPF0234 protein YajQ	yajQ	sp|P0A8E7|YAJQ_ECOLI UPF0234 protein YajQ OS=Escherichia coli (strain K12) OX=83333 GN=yajQ PE=1 SV=2	1	10	10	10	10	10	10	10	9	9	10	10	10	10	9	9	10	10	10	10	9	9	69.9	69.9	69.9	18.344	163	163	0	323.31	By MS/MS	By MS/MS	By MS/MS	By MS/MS	By MS/MS	By MS/MS	69.9	69.9	69.9	69.9	64.4	64.4
P0A8F0	P0A8F0	11	11	11	Uracil phosphoribosyltransferase	upp	sp|P0A8F0|UPP_ECOLI Uracil phosphoribosyltransferase OS=Escherichia coli (strain K12) OX=83333 GN=upp PE=1 SV=1	1	11	11	11	9	7	9	10	11	10	9	7	9	10	11	10	9	7	9	10	11	10	79.3	79.3	79.3	22.533	208	208	0	323.31	By MS/MS	By MS/MS	By MS/MS	By MS/MS	By MS/MS	By MS/MS	67.3	48.1	70.2	78.4	79.3	78.4
P0A8F4	P0A8F4	6	6	6	Uridine kinase	udk	sp|P0A8F4|URK_ECOLI Uridine kinase OS=Escherichia coli (strain K12) OX=83333 GN=udk PE=3 SV=1	1	6	6	6	1	2	2	5	4	5	1	2	2	5	4	5	1	2	2	5	4	5	39	39	39	24.353	213	213	0	30.776	By MS/MS	By MS/MS	By matching	By MS/MS	By MS/MS	By MS/MS	4.2	8	12.2	30.5	21.1	28.6
P0A8F8	P0A8F8	4	4	4	UvrABC system protein B	uvrB	sp|P0A8F8|UVRB_ECOLI UvrABC system protein B OS=Escherichia coli (strain K12) OX=83333 GN=uvrB PE=1 SV=2	1	4	4	4	0	0	0	1	4	2	0	0	0	1	4	2	0	0	0	1	4	2	7	7	7	76.225	673	673	0	17.395				By MS/MS	By MS/MS	By MS/MS	0	0	0	1.5	7	4
P0A8G3	P0A8G3	2	2	2	Uronate isomerase	uxaC	sp|P0A8G3|UXAC_ECOLI Uronate isomerase OS=Escherichia coli (strain K12) OX=83333 GN=uxaC PE=2 SV=1	1	2	2	2	1	0	1	1	2	2	1	0	1	1	2	2	1	0	1	1	2	2	6.2	6.2	6.2	53.987	470	470	0.0054164	2.9344	By MS/MS		By MS/MS	By MS/MS	By MS/MS	By MS/MS	2.1	0	2.1	2.1	6.2	6.2
P0A8G6	P0A8G6	7	7	7	NAD(P)H dehydrogenase (quinone)	wrbA	sp|P0A8G6|NQOR_ECOLI NAD(P)H dehydrogenase (quinone) OS=Escherichia coli (strain K12) OX=83333 GN=wrbA PE=1 SV=2	1	7	7	7	4	5	7	7	7	7	4	5	7	7	7	7	4	5	7	7	7	7	51	51	51	20.845	198	198	0	177.47	By MS/MS	By MS/MS	By MS/MS	By MS/MS	By MS/MS	By MS/MS	23.2	29.3	51	51	51	51
P0A8I3	P0A8I3	1	1	1	UPF0246 protein YaaA	yaaA	sp|P0A8I3|YAAA_ECOLI Peroxide stress resistance protein YaaA OS=Escherichia coli (strain K12) OX=83333 GN=yaaA PE=1 SV=1	1	1	1	1	0	0	0	0	1	1	0	0	0	0	1	1	0	0	0	0	1	1	5.4	5.4	5.4	29.585	258	258	0	4.5755					By MS/MS	By MS/MS	0	0	0	0	5.4	5.4
P0A8I5	P0A8I5	3	3	3	tRNA (guanine-N(7)-)-methyltransferase	trmB	sp|P0A8I5|TRMB_ECOLI tRNA (guanine-N(7)-)-methyltransferase OS=Escherichia coli (strain K12) OX=83333 GN=trmB PE=1 SV=1	1	3	3	3	1	1	2	2	2	2	1	1	2	2	2	2	1	1	2	2	2	2	14.2	14.2	14.2	27.307	239	239	0	9.1923	By MS/MS	By MS/MS	By MS/MS	By MS/MS	By MS/MS	By matching	4.6	4.6	9.2	9.2	9.6	9.2
P0A8I8	P0A8I8	3	3	3	Ribosomal RNA large subunit methyltransferase H	rlmH	sp|P0A8I8|RLMH_ECOLI Ribosomal RNA large subunit methyltransferase H OS=Escherichia coli (strain K12) OX=83333 GN=rlmH PE=1 SV=1	1	3	3	3	0	0	0	0	3	0	0	0	0	0	3	0	0	0	0	0	3	0	24.5	24.5	24.5	17.341	155	155	0	7.5771					By MS/MS		0	0	0	0	24.5	0
P0A8J4	P0A8J4	2	2	2	UPF0250 protein YbeD	ybeD	sp|P0A8J4|YBED_ECOLI UPF0250 protein YbeD OS=Escherichia coli (strain K12) OX=83333 GN=ybeD PE=1 SV=1	1	2	2	2	1	0	0	1	2	1	1	0	0	1	2	1	1	0	0	1	2	1	39.1	39.1	39.1	9.8272	87	87	0	22.395	By matching			By MS/MS	By MS/MS	By matching	21.8	0	0	21.8	39.1	21.8
P0A8J8	P0A8J8	12	12	12	ATP-dependent RNA helicase RhlB	rhlB	sp|P0A8J8|RHLB_ECOLI ATP-dependent RNA helicase RhlB OS=Escherichia coli (strain K12) OX=83333 GN=rhlB PE=1 SV=2	1	12	12	12	2	5	6	10	11	10	2	5	6	10	11	10	2	5	6	10	11	10	38	38	38	47.125	421	421	0	85.17	By MS/MS	By MS/MS	By MS/MS	By MS/MS	By MS/MS	By MS/MS	7.6	18.3	19.2	31.4	33.3	32.8
P0A8K1	P0A8K1	3	3	3	Phosphatidylserine decarboxylase proenzyme;Phosphatidylserine decarboxylase alpha chain;Phosphatidylserine decarboxylase beta chain	psd	sp|P0A8K1|PSD_ECOLI Phosphatidylserine decarboxylase proenzyme OS=Escherichia coli (strain K12) OX=83333 GN=psd PE=1 SV=1	1	3	3	3	2	1	2	2	2	2	2	1	2	2	2	2	2	1	2	2	2	2	16.8	16.8	16.8	35.934	322	322	0	17.281	By MS/MS	By MS/MS	By matching	By MS/MS	By MS/MS	By MS/MS	13	8.1	13	13	8.7	13
P0A8L1	P0A8L1	25	25	25	Serine--tRNA ligase	serS	sp|P0A8L1|SYS_ECOLI Serine--tRNA ligase OS=Escherichia coli (strain K12) OX=83333 GN=serS PE=1 SV=1	1	25	25	25	18	10	16	25	23	23	18	10	16	25	23	23	18	10	16	25	23	23	73	73	73	48.413	430	430	0	323.31	By MS/MS	By MS/MS	By MS/MS	By MS/MS	By MS/MS	By MS/MS	55.8	29.1	46.3	73	68.8	62.1
P0A8M0	P0A8M0	21	21	21	Asparagine--tRNA ligase	asnS	sp|P0A8M0|SYN_ECOLI Asparagine--tRNA ligase OS=Escherichia coli (strain K12) OX=83333 GN=asnS PE=1 SV=2	1	21	21	21	17	15	15	19	18	18	17	15	15	19	18	18	17	15	15	19	18	18	51.5	51.5	51.5	52.57	466	466	0	299.94	By MS/MS	By MS/MS	By MS/MS	By MS/MS	By MS/MS	By MS/MS	39.1	36.1	37.8	45.1	42.9	47.6
P0A8M3	P0A8M3	30	30	30	Threonine--tRNA ligase	thrS	sp|P0A8M3|SYT_ECOLI Threonine--tRNA ligase OS=Escherichia coli (strain K12) OX=83333 GN=thrS PE=1 SV=1	1	30	30	30	18	12	13	28	27	25	18	12	13	28	27	25	18	12	13	28	27	25	55.9	55.9	55.9	74.013	642	642	0	239.8	By MS/MS	By MS/MS	By MS/MS	By MS/MS	By MS/MS	By MS/MS	30.8	21.3	22.3	54.5	51.4	47.4
P0A8M6	P0A8M6	4	4	4	UPF0265 protein YeeX	yeeX	sp|P0A8M6|YEEX_ECOLI UPF0265 protein YeeX OS=Escherichia coli (strain K12) OX=83333 GN=yeeX PE=1 SV=1	1	4	4	4	2	1	1	4	1	1	2	1	1	4	1	1	2	1	1	4	1	1	37.6	37.6	37.6	12.778	109	109	0	11.136	By MS/MS	By matching	By matching	By MS/MS	By MS/MS	By MS/MS	17.4	6.4	11	37.6	11	11
P0A8N3	P0A8N3	33	33	22	Lysine--tRNA ligase	lysS	sp|P0A8N3|SYK1_ECOLI Lysine--tRNA ligase OS=Escherichia coli (strain K12) OX=83333 GN=lysS PE=1 SV=2	1	33	33	22	19	16	22	25	29	31	19	16	22	25	29	31	10	10	12	16	18	21	81.6	81.6	66.1	57.603	505	505	0	323.31	By MS/MS	By MS/MS	By MS/MS	By MS/MS	By MS/MS	By MS/MS	41.6	38	47.5	61.4	66.3	79.4
P0A8N5	P0A8N5	28	17	17	Lysine--tRNA ligase, heat inducible	lysU	sp|P0A8N5|SYK2_ECOLI Lysine--tRNA ligase, heat inducible OS=Escherichia coli (strain K12) OX=83333 GN=lysU PE=1 SV=2	1	28	17	17	23	17	21	25	26	26	14	11	11	16	15	16	14	11	11	16	15	16	63	47.5	47.5	57.826	505	505	0	198.58	By MS/MS	By MS/MS	By MS/MS	By MS/MS	By MS/MS	By MS/MS	47.7	38.8	39.2	57.4	59.8	58.8
P0A8N7	P0A8N7	3	3	3	Elongation factor P--(R)-beta-lysine ligase	epmA	sp|P0A8N7|EPMA_ECOLI Elongation factor P--(R)-beta-lysine ligase OS=Escherichia coli (strain K12) OX=83333 GN=epmA PE=1 SV=1	1	3	3	3	0	0	0	2	2	0	0	0	0	2	2	0	0	0	0	2	2	0	16.6	16.6	16.6	36.976	325	325	0	21.453				By MS/MS	By MS/MS		0	0	0	8.6	13.2	0
P0A8P3	P0A8P3	2	2	2	Probable Fe(2+)-trafficking protein	yggX	sp|P0A8P3|FETP_ECOLI Probable Fe(2+)-trafficking protein OS=Escherichia coli (strain K12) OX=83333 GN=yggX PE=1 SV=2	1	2	2	2	2	1	1	2	1	2	2	1	1	2	1	2	2	1	1	2	1	2	25.3	25.3	25.3	10.952	91	91	0	11.48	By MS/MS	By MS/MS	By matching	By MS/MS	By MS/MS	By MS/MS	25.3	17.6	7.7	25.3	7.7	25.3
P0A8P6	P0A8P6	1	1	1	Tyrosine recombinase XerC	xerC	sp|P0A8P6|XERC_ECOLI Tyrosine recombinase XerC OS=Escherichia coli (strain K12) OX=83333 GN=xerC PE=1 SV=1	1	1	1	1	0	0	0	1	1	1	0	0	0	1	1	1	0	0	0	1	1	1	4.7	4.7	4.7	33.867	298	298	0.0027894	3.3259				By MS/MS	By MS/MS	By MS/MS	0	0	0	4.7	4.7	4.7
P0A8Q0	P0A8Q0	1	1	1	Fumarate reductase subunit C	frdC	sp|P0A8Q0|FRDC_ECOLI Fumarate reductase subunit C OS=Escherichia coli (strain K12) OX=83333 GN=frdC PE=1 SV=1	1	1	1	1	0	0	1	1	1	1	0	0	1	1	1	1	0	0	1	1	1	1	6.1	6.1	6.1	15.015	131	131	0.006605	2.5566			By matching	By MS/MS	By MS/MS	By MS/MS	0	0	6.1	6.1	6.1	6.1
P0A8Q3	P0A8Q3	1	1	1	Fumarate reductase subunit D	frdD	sp|P0A8Q3|FRDD_ECOLI Fumarate reductase subunit D OS=Escherichia coli (strain K12) OX=83333 GN=frdD PE=1 SV=1	1	1	1	1	0	0	1	1	1	1	0	0	1	1	1	1	0	0	1	1	1	1	5.9	5.9	5.9	13.107	119	119	1	-2			By matching	By matching	By MS/MS	By matching	0	0	5.9	5.9	5.9	5.9
P0A8R0	P0A8R0	3	3	3	Regulator of ribonuclease activity A	rraA	sp|P0A8R0|RRAA_ECOLI Regulator of ribonuclease activity A OS=Escherichia coli (strain K12) OX=83333 GN=rraA PE=1 SV=1	1	3	3	3	1	1	0	2	0	0	1	1	0	2	0	0	1	1	0	2	0	0	19.3	19.3	19.3	17.36	161	161	0	4.7467	By matching	By MS/MS		By MS/MS			5.6	6.8	0	12.4	0	0
P0A8R7	P0A8R7	2	2	2	UPF0283 membrane protein YcjF	ycjF	sp|P0A8R7|YCJF_ECOLI UPF0283 membrane protein YcjF OS=Escherichia coli (strain K12) OX=83333 GN=ycjF PE=1 SV=1	1	2	2	2	0	0	0	1	2	2	0	0	0	1	2	2	0	0	0	1	2	2	8.5	8.5	8.5	39.392	353	353	0	6.4865				By MS/MS	By MS/MS	By MS/MS	0	0	0	4.5	8.5	8.5
P0A8S1	P0A8S1	2	2	2	HTH-type transcriptional regulator ArgP	argP	sp|P0A8S1|ARGP_ECOLI HTH-type transcriptional regulator ArgP OS=Escherichia coli (strain K12) OX=83333 GN=argP PE=1 SV=1	1	2	2	2	1	0	0	1	2	1	1	0	0	1	2	1	1	0	0	1	2	1	9.8	9.8	9.8	33.471	297	297	0	16.968	By matching			By matching	By MS/MS	By matching	4	0	0	4	9.8	5.7
P0A8T1;CON__Q9N2I2	P0A8T1	6;1	6;1	6;1	Ribosomal protein L11 methyltransferase	prmA	sp|P0A8T1|PRMA_ECOLI Ribosomal protein L11 methyltransferase OS=Escherichia coli (strain K12) OX=83333 GN=prmA PE=1 SV=1	2	6	6	6	3	3	4	6	5	6	3	3	4	6	5	6	3	3	4	6	5	6	20.8	20.8	20.8	31.877	293	293;404	0	28.74	By MS/MS	By MS/MS	By matching	By MS/MS	By MS/MS	By MS/MS	12.3	12.3	14.7	20.8	18.1	20.8
P0A8T7	P0A8T7	69	69	69	DNA-directed RNA polymerase subunit beta	rpoC	sp|P0A8T7|RPOC_ECOLI DNA-directed RNA polymerase subunit beta OS=Escherichia coli (strain K12) OX=83333 GN=rpoC PE=1 SV=1	1	69	69	69	54	50	52	62	65	64	54	50	52	62	65	64	54	50	52	62	65	64	63.8	63.8	63.8	155.16	1407	1407	0	323.31	By MS/MS	By MS/MS	By MS/MS	By MS/MS	By MS/MS	By MS/MS	52.2	48.7	49.5	60	61.9	59.9
P0A8U2	P0A8U2	4	4	4	UPF0294 protein YafD	yafD	sp|P0A8U2|YAFD_ECOLI UPF0294 protein YafD OS=Escherichia coli (strain K12) OX=83333 GN=yafD PE=3 SV=1	1	4	4	4	0	0	0	3	2	1	0	0	0	3	2	1	0	0	0	3	2	1	14.3	14.3	14.3	29.991	266	266	0	9.1444				By MS/MS	By MS/MS	By matching	0	0	0	9.4	8.3	3.4
P0A8V2	P0A8V2	71	71	71	DNA-directed RNA polymerase subunit beta	rpoB	sp|P0A8V2|RPOB_ECOLI DNA-directed RNA polymerase subunit beta OS=Escherichia coli (strain K12) OX=83333 GN=rpoB PE=1 SV=1	1	71	71	71	60	53	52	64	65	67	60	53	52	64	65	67	60	53	52	64	65	67	65	65	65	150.63	1342	1342	0	323.31	By MS/MS	By MS/MS	By MS/MS	By MS/MS	By MS/MS	By MS/MS	56.1	54.9	52.5	58	62.2	63.4
P0A8V6	P0A8V6	7	7	7	Fatty acid metabolism regulator protein	fadR	sp|P0A8V6|FADR_ECOLI Fatty acid metabolism regulator protein OS=Escherichia coli (strain K12) OX=83333 GN=fadR PE=1 SV=2	1	7	7	7	1	2	0	2	3	4	1	2	0	2	3	4	1	2	0	2	3	4	44.8	44.8	44.8	26.968	239	239	0	113.45	By matching	By matching		By MS/MS	By MS/MS	By MS/MS	4.6	8.4	0	9.2	19.7	24.3
P0A8W0	P0A8W0	2	2	2	Transcriptional regulator NanR	nanR	sp|P0A8W0|NANR_ECOLI HTH-type transcriptional repressor NanR OS=Escherichia coli (strain K12) OX=83333 GN=nanR PE=1 SV=1	1	2	2	2	0	0	0	1	0	2	0	0	0	1	0	2	0	0	0	1	0	2	10.3	10.3	10.3	29.524	263	263	0	11.829				By MS/MS		By MS/MS	0	0	0	3.8	0	10.3
P0A8W5	P0A8W5	9	9	9	UPF0301 protein YqgE	yqgE	sp|P0A8W5|YQGE_ECOLI UPF0301 protein YqgE OS=Escherichia coli (strain K12) OX=83333 GN=yqgE PE=1 SV=1	1	9	9	9	7	8	8	7	7	8	7	8	8	7	7	8	7	8	8	7	7	8	61.5	61.5	61.5	20.686	187	187	0	153.13	By MS/MS	By MS/MS	By MS/MS	By MS/MS	By MS/MS	By MS/MS	49.7	48.7	61.5	57.8	48.7	61.5
P0A8W8	P0A8W8	4	4	4	UPF0304 protein YfbU	yfbU	sp|P0A8W8|YFBU_ECOLI UPF0304 protein YfbU OS=Escherichia coli (strain K12) OX=83333 GN=yfbU PE=1 SV=1	1	4	4	4	3	3	3	3	4	4	3	3	3	3	4	4	3	3	3	3	4	4	23.2	23.2	23.2	19.536	164	164	0	28.843	By MS/MS	By MS/MS	By MS/MS	By MS/MS	By MS/MS	By MS/MS	18.9	18.3	18.3	18.3	23.2	23.2
P0A8X0	P0A8X0	4	4	4	UPF0307 protein YjgA	yjgA	sp|P0A8X0|YJGA_ECOLI UPF0307 protein YjgA OS=Escherichia coli (strain K12) OX=83333 GN=yjgA PE=1 SV=1	1	4	4	4	1	2	1	2	4	1	1	2	1	2	4	1	1	2	1	2	4	1	18	18	18	21.359	183	183	0	8.5171	By matching	By MS/MS	By matching	By MS/MS	By MS/MS	By MS/MS	4.4	9.8	5.5	9.8	18	5.5
P0A8Y3	P0A8Y3	5	5	5	Alpha-D-glucose-1-phosphate phosphatase YihX	yihX	sp|P0A8Y3|YIHX_ECOLI Alpha-D-glucose 1-phosphate phosphatase YihX OS=Escherichia coli (strain K12) OX=83333 GN=yihX PE=1 SV=1	1	5	5	5	2	1	1	3	5	4	2	1	1	3	5	4	2	1	1	3	5	4	28.6	28.6	28.6	22.732	199	199	0	28.75	By MS/MS	By matching	By matching	By MS/MS	By MS/MS	By MS/MS	9	4.5	4.5	14.1	28.6	21.6
P0A8Y5	P0A8Y5	3	3	3	Sugar phosphatase YidA	yidA	sp|P0A8Y5|YIDA_ECOLI Sugar phosphatase YidA OS=Escherichia coli (strain K12) OX=83333 GN=yidA PE=1 SV=1	1	3	3	3	2	1	2	2	3	3	2	1	2	2	3	3	2	1	2	2	3	3	11.9	11.9	11.9	29.721	270	270	0	5.5568	By MS/MS	By MS/MS	By matching	By MS/MS	By MS/MS	By MS/MS	7	3	7	7	11.9	11.9
P0A8Z0	P0A8Z0	4	4	4	Acyl-CoA thioester hydrolase YciA	yciA	sp|P0A8Z0|YCIA_ECOLI Acyl-CoA thioester hydrolase YciA OS=Escherichia coli (strain K12) OX=83333 GN=yciA PE=3 SV=1	1	4	4	4	1	1	0	4	4	3	1	1	0	4	4	3	1	1	0	4	4	3	25.8	25.8	25.8	14.23	132	132	0	15.135	By MS/MS	By MS/MS		By MS/MS	By MS/MS	By MS/MS	6.8	6.8	0	25.8	25.8	25.8
P0A8Z3	P0A8Z3	4	4	4	Acyl-CoA thioester hydrolase YbgC	ybgC	sp|P0A8Z3|YBGC_ECOLI Acyl-CoA thioester hydrolase YbgC OS=Escherichia coli (strain K12) OX=83333 GN=ybgC PE=1 SV=1	1	4	4	4	1	0	0	3	3	4	1	0	0	3	3	4	1	0	0	3	3	4	40.3	40.3	40.3	15.562	134	134	0	220.21	By matching			By MS/MS	By MS/MS	By MS/MS	6.7	0	0	29.1	35.1	40.3
P0A903	P0A903	8	8	8	Outer membrane protein assembly factor BamC	bamC	sp|P0A903|BAMC_ECOLI Outer membrane protein assembly factor BamC OS=Escherichia coli (strain K12) OX=83333 GN=bamC PE=1 SV=1	1	8	8	8	2	2	0	4	7	3	2	2	0	4	7	3	2	2	0	4	7	3	35.8	35.8	35.8	36.842	344	344	0	52.199	By matching	By MS/MS		By MS/MS	By MS/MS	By MS/MS	7.3	10.2	0	18	29.4	15.4
P0A905	P0A905	5	5	5	Outer membrane lipoprotein SlyB	slyB	sp|P0A905|SLYB_ECOLI Outer membrane lipoprotein SlyB OS=Escherichia coli (strain K12) OX=83333 GN=slyB PE=2 SV=1	1	5	5	5	5	4	5	4	5	4	5	4	5	4	5	4	5	4	5	4	5	4	38.7	38.7	38.7	15.601	155	155	0	108.33	By MS/MS	By MS/MS	By MS/MS	By MS/MS	By MS/MS	By MS/MS	38.7	38.1	38.7	38.1	38.7	38.1
P0A908	P0A908	6	6	6	MltA-interacting protein	mipA	sp|P0A908|MIPA_ECOLI MltA-interacting protein OS=Escherichia coli (strain K12) OX=83333 GN=mipA PE=1 SV=1	1	6	6	6	5	3	5	5	6	6	5	3	5	5	6	6	5	3	5	5	6	6	40.7	40.7	40.7	27.831	248	248	0	165.87	By MS/MS	By MS/MS	By MS/MS	By MS/MS	By MS/MS	By MS/MS	31.5	17.3	31.5	31.5	40.7	40.7
P0A910	P0A910	19	19	19	Outer membrane protein A	ompA	sp|P0A910|OMPA_ECOLI Outer membrane protein A OS=Escherichia coli (strain K12) OX=83333 GN=ompA PE=1 SV=1	1	19	19	19	18	18	17	16	19	16	18	18	17	16	19	16	18	18	17	16	19	16	66.8	66.8	66.8	37.2	346	346	0	323.31	By MS/MS	By MS/MS	By MS/MS	By MS/MS	By MS/MS	By MS/MS	66.8	66.8	64.7	64.7	66.8	64.7
P0A912	P0A912	6	6	6	Peptidoglycan-associated lipoprotein	pal	sp|P0A912|PAL_ECOLI Peptidoglycan-associated lipoprotein OS=Escherichia coli (strain K12) OX=83333 GN=pal PE=1 SV=1	1	6	6	6	5	4	4	6	5	4	5	4	4	6	5	4	5	4	4	6	5	4	48.6	48.6	48.6	18.824	173	173	0	34.793	By MS/MS	By MS/MS	By MS/MS	By MS/MS	By MS/MS	By MS/MS	38.2	29.5	29.5	48.6	38.2	29.5
P0A915	P0A915	1	1	1	Outer membrane protein W	ompW	sp|P0A915|OMPW_ECOLI Outer membrane protein W OS=Escherichia coli (strain K12) OX=83333 GN=ompW PE=1 SV=1	1	1	1	1	1	1	1	1	1	1	1	1	1	1	1	1	1	1	1	1	1	1	4.7	4.7	4.7	22.928	212	212	0.0060281	2.7698	By MS/MS	By MS/MS	By MS/MS	By matching	By MS/MS	By MS/MS	4.7	4.7	4.7	4.7	4.7	4.7
P0A917	P0A917	6	6	6	Outer membrane protein X	ompX	sp|P0A917|OMPX_ECOLI Outer membrane protein X OS=Escherichia coli (strain K12) OX=83333 GN=ompX PE=1 SV=1	1	6	6	6	6	5	6	6	5	5	6	5	6	6	5	5	6	5	6	6	5	5	43.9	43.9	43.9	18.602	171	171	0	97.138	By MS/MS	By MS/MS	By MS/MS	By MS/MS	By MS/MS	By MS/MS	43.9	43.9	43.9	43.9	33.9	33.9
P0A927	P0A927	7	7	7	Nucleoside-specific channel-forming protein tsx	tsx	sp|P0A927|TSX_ECOLI Nucleoside-specific channel-forming protein Tsx OS=Escherichia coli (strain K12) OX=83333 GN=tsx PE=1 SV=1	1	7	7	7	7	5	5	7	6	5	7	5	5	7	6	5	7	5	5	7	6	5	41.2	41.2	41.2	33.589	294	294	0	151	By MS/MS	By MS/MS	By MS/MS	By MS/MS	By MS/MS	By MS/MS	41.2	24.5	27.2	41.2	32.7	28.6
P0A935	P0A935	3	3	3	Membrane-bound lytic murein transglycosylase A	mltA	sp|P0A935|MLTA_ECOLI Membrane-bound lytic murein transglycosylase A OS=Escherichia coli (strain K12) OX=83333 GN=mltA PE=1 SV=1	1	3	3	3	1	0	1	0	1	1	1	0	1	0	1	1	1	0	1	0	1	1	7.9	7.9	7.9	40.41	365	365	0	8.9347	By MS/MS		By matching		By MS/MS	By MS/MS	3.6	0	3.6	0	5.8	2.2
P0A937	P0A937	1	1	1	Outer membrane protein assembly factor BamE	bamE	sp|P0A937|BAME_ECOLI Outer membrane protein assembly factor BamE OS=Escherichia coli (strain K12) OX=83333 GN=bamE PE=1 SV=1	1	1	1	1	1	1	1	1	1	1	1	1	1	1	1	1	1	1	1	1	1	1	17.7	17.7	17.7	12.302	113	113	0	10.709	By MS/MS	By MS/MS	By MS/MS	By MS/MS	By MS/MS	By MS/MS	17.7	17.7	17.7	17.7	17.7	17.7
P0A940	P0A940	30	30	30	Outer membrane protein assembly factor BamA	bamA	sp|P0A940|BAMA_ECOLI Outer membrane protein assembly factor BamA OS=Escherichia coli (strain K12) OX=83333 GN=bamA PE=1 SV=1	1	30	30	30	16	16	13	23	26	26	16	16	13	23	26	26	16	16	13	23	26	26	49.8	49.8	49.8	90.552	810	810	0	284.43	By MS/MS	By MS/MS	By MS/MS	By MS/MS	By MS/MS	By MS/MS	26.7	27.3	20.6	40.1	42.7	43.1
P0A948	P0A948	1	1	1	Ribosomal-protein-alanine acetyltransferase	rimJ	sp|P0A948|RIMJ_ECOLI [Ribosomal protein S5]-alanine N-acetyltransferase OS=Escherichia coli (strain K12) OX=83333 GN=rimJ PE=1 SV=1	1	1	1	1	1	0	1	1	1	1	1	0	1	1	1	1	1	0	1	1	1	1	4.6	4.6	4.6	22.688	194	194	0.0054274	2.9518	By matching		By matching	By matching	By MS/MS	By MS/MS	4.6	0	4.6	4.6	4.6	4.6
P0A951	P0A951	2	2	2	Spermidine N(1)-acetyltransferase	speG	sp|P0A951|ATDA_ECOLI Spermidine N(1)-acetyltransferase OS=Escherichia coli (strain K12) OX=83333 GN=speG PE=1 SV=2	1	2	2	2	1	1	0	2	1	2	1	1	0	2	1	2	1	1	0	2	1	2	11.3	11.3	11.3	21.887	186	186	0	9.2524	By matching	By MS/MS		By MS/MS	By MS/MS	By MS/MS	4.8	6.5	0	11.3	6.5	11.3
P0A953	P0A953	13	13	13	3-oxoacyl-[acyl-carrier-protein] synthase 1	fabB	sp|P0A953|FABB_ECOLI 3-oxoacyl-[acyl-carrier-protein] synthase 1 OS=Escherichia coli (strain K12) OX=83333 GN=fabB PE=1 SV=1	1	13	13	13	9	7	8	12	12	12	9	7	8	12	12	12	9	7	8	12	12	12	49.3	49.3	49.3	42.613	406	406	0	323.31	By MS/MS	By MS/MS	By MS/MS	By MS/MS	By MS/MS	By MS/MS	28.6	22.4	26.1	49	41.9	49
P0A955	P0A955	10	10	10	KHG/KDPG aldolase;4-hydroxy-2-oxoglutarate aldolase;2-dehydro-3-deoxy-phosphogluconate aldolase	eda	sp|P0A955|ALKH_ECOLI KHG/KDPG aldolase OS=Escherichia coli (strain K12) OX=83333 GN=eda PE=1 SV=1	1	10	10	10	8	6	5	9	9	10	8	6	5	9	9	10	8	6	5	9	9	10	80.8	80.8	80.8	22.284	213	213	0	195.42	By MS/MS	By MS/MS	By MS/MS	By MS/MS	By MS/MS	By MS/MS	64.8	47.4	27.7	70	74.6	80.8
P0A959	P0A959	8	8	8	Glutamate-pyruvate aminotransferase AlaA	alaA	sp|P0A959|ALAA_ECOLI Glutamate-pyruvate aminotransferase AlaA OS=Escherichia coli (strain K12) OX=83333 GN=alaA PE=1 SV=1	1	8	8	8	2	1	0	6	7	7	2	1	0	6	7	7	2	1	0	6	7	7	30.4	30.4	30.4	45.517	405	405	0	39.797	By matching	By matching		By MS/MS	By MS/MS	By MS/MS	6.7	4.2	0	20.2	23	27.7
P0A962	P0A962	4	4	4	L-asparaginase 1	ansA	sp|P0A962|ASPG1_ECOLI L-asparaginase 1 OS=Escherichia coli (strain K12) OX=83333 GN=ansA PE=1 SV=1	1	4	4	4	2	0	2	3	3	3	2	0	2	3	3	3	2	0	2	3	3	3	25.4	25.4	25.4	37.127	338	338	0	10.053	By MS/MS		By MS/MS	By MS/MS	By MS/MS	By MS/MS	6.8	0	10.7	14.2	18	14.2
P0A972	P0A972	4	4	4	Cold shock-like protein CspE	cspE	sp|P0A972|CSPE_ECOLI Cold shock-like protein CspE OS=Escherichia coli (strain K12) OX=83333 GN=cspE PE=1 SV=2	1	4	4	4	4	4	4	4	4	4	4	4	4	4	4	4	4	4	4	4	4	4	68.1	68.1	68.1	7.4634	69	69	0	45.179	By MS/MS	By MS/MS	By MS/MS	By MS/MS	By MS/MS	By MS/MS	68.1	68.1	68.1	68.1	68.1	68.1
P0A978	P0A978	3	2	2	Cold shock-like protein CspG	cspG	sp|P0A978|CSPG_ECOLI Cold shock-like protein CspG OS=Escherichia coli (strain K12) OX=83333 GN=cspG PE=1 SV=1	1	3	2	2	3	3	2	1	2	1	2	2	1	0	1	0	2	2	1	0	1	0	45.7	28.6	28.6	7.7806	70	70	0	4.194	By MS/MS	By MS/MS	By MS/MS	By matching	By MS/MS	By matching	45.7	45.7	31.4	17.1	31.4	17.1
P0A988	P0A988	9	9	9	DNA polymerase III subunit beta	dnaN	sp|P0A988|DPO3B_ECOLI Beta sliding clamp OS=Escherichia coli (strain K12) OX=83333 GN=dnaN PE=1 SV=1	1	9	9	9	1	0	0	8	6	4	1	0	0	8	6	4	1	0	0	8	6	4	29	29	29	40.586	366	366	0	45.748	By matching			By MS/MS	By MS/MS	By MS/MS	4.6	0	0	24.6	20.8	12.6
P0A991	P0A991	7	7	7	Fructose-bisphosphate aldolase class 1	fbaB	sp|P0A991|ALF1_ECOLI Fructose-bisphosphate aldolase class 1 OS=Escherichia coli (strain K12) OX=83333 GN=fbaB PE=1 SV=2	1	7	7	7	4	4	2	5	3	2	4	4	2	5	3	2	4	4	2	5	3	2	24.9	24.9	24.9	38.109	350	350	0	44.889	By MS/MS	By MS/MS	By MS/MS	By MS/MS	By MS/MS	By MS/MS	16.6	15.4	6.9	19.4	10.6	6
P0A993	P0A993	11	11	11	Fructose-1,6-bisphosphatase class 1	fbp	sp|P0A993|F16PA_ECOLI Fructose-1,6-bisphosphatase class 1 OS=Escherichia coli (strain K12) OX=83333 GN=fbp PE=1 SV=1	1	11	11	11	6	3	5	9	10	10	6	3	5	9	10	10	6	3	5	9	10	10	48.2	48.2	48.2	36.833	332	332	0	181.64	By MS/MS	By MS/MS	By MS/MS	By MS/MS	By MS/MS	By MS/MS	26.2	11.4	22.3	40.1	42.5	42.5
P0A996	P0A996	19	19	19	Anaerobic glycerol-3-phosphate dehydrogenase subunit C	glpC	sp|P0A996|GLPC_ECOLI Anaerobic glycerol-3-phosphate dehydrogenase subunit C OS=Escherichia coli (strain K12) OX=83333 GN=glpC PE=1 SV=1	1	19	19	19	8	7	8	12	15	16	8	7	8	12	15	16	8	7	8	12	15	16	51.8	51.8	51.8	44.108	396	396	0	85.999	By MS/MS	By MS/MS	By MS/MS	By MS/MS	By MS/MS	By MS/MS	18.7	20.5	20.5	31.3	40.9	42.9
P0A998	P0A998	8	8	8	Bacterial non-heme ferritin	ftnA	sp|P0A998|FTNA_ECOLI Bacterial non-heme ferritin OS=Escherichia coli (strain K12) OX=83333 GN=ftnA PE=1 SV=1	1	8	8	8	6	6	5	5	5	7	6	6	5	5	5	7	6	6	5	5	5	7	50.3	50.3	50.3	19.424	165	165	0	138.94	By MS/MS	By MS/MS	By MS/MS	By MS/MS	By MS/MS	By MS/MS	44.8	43.6	38.2	38.8	37.6	42.4
P0A9A2	P0A9A2	1	1	1	Bacterial non-heme ferritin-like protein	ftnB	sp|P0A9A2|FTNB_ECOLI Bacterial non-heme ferritin-like protein OS=Escherichia coli (strain K12) OX=83333 GN=ftnB PE=3 SV=1	1	1	1	1	0	0	0	0	1	0	0	0	0	0	1	0	0	0	0	0	1	0	7.2	7.2	7.2	18.894	167	167	0.0097593	2.354					By MS/MS		0	0	0	0	7.2	0
P0A9A6	P0A9A6	25	25	25	Cell division protein FtsZ	ftsZ	sp|P0A9A6|FTSZ_ECOLI Cell division protein FtsZ OS=Escherichia coli (strain K12) OX=83333 GN=ftsZ PE=1 SV=1	1	25	25	25	13	16	13	22	24	21	13	16	13	22	24	21	13	16	13	22	24	21	88	88	88	40.323	383	383	0	323.31	By MS/MS	By MS/MS	By MS/MS	By MS/MS	By MS/MS	By MS/MS	44.9	57.2	44.4	77.8	84.9	76
P0A9A9	P0A9A9	2	2	2	Ferric uptake regulation protein	fur	sp|P0A9A9|FUR_ECOLI Ferric uptake regulation protein OS=Escherichia coli (strain K12) OX=83333 GN=fur PE=1 SV=1	1	2	2	2	1	2	2	1	2	2	1	2	2	1	2	2	1	2	2	1	2	2	16.9	16.9	16.9	16.795	148	148	0	10.518	By MS/MS	By MS/MS	By MS/MS	By MS/MS	By MS/MS	By MS/MS	8.1	16.9	16.9	8.1	16.9	16.9
P0A9B2	P0A9B2	18	18	18	Glyceraldehyde-3-phosphate dehydrogenase A	gapA	sp|P0A9B2|G3P1_ECOLI Glyceraldehyde-3-phosphate dehydrogenase A OS=Escherichia coli (strain K12) OX=83333 GN=gapA PE=1 SV=2	1	18	18	18	16	16	16	16	17	16	16	16	16	16	17	16	16	16	16	16	17	16	69.5	69.5	69.5	35.532	331	331	0	323.31	By MS/MS	By MS/MS	By MS/MS	By MS/MS	By MS/MS	By MS/MS	59.5	60.4	59.5	60.4	66.2	59.5
P0A9B6	P0A9B6	5	5	5	D-erythrose-4-phosphate dehydrogenase	epd	sp|P0A9B6|E4PD_ECOLI D-erythrose-4-phosphate dehydrogenase OS=Escherichia coli (strain K12) OX=83333 GN=epd PE=1 SV=2	1	5	5	5	1	0	0	3	4	1	1	0	0	3	4	1	1	0	0	3	4	1	19.8	19.8	19.8	37.299	339	339	0	23.369	By matching			By MS/MS	By MS/MS	By matching	2.9	0	0	10.3	15.6	4.1
P0A9C0	P0A9C0	32	32	32	Anaerobic glycerol-3-phosphate dehydrogenase subunit A	glpA	sp|P0A9C0|GLPA_ECOLI Anaerobic glycerol-3-phosphate dehydrogenase subunit A OS=Escherichia coli (strain K12) OX=83333 GN=glpA PE=1 SV=1	1	32	32	32	19	22	19	29	31	28	19	22	19	29	31	28	19	22	19	29	31	28	76.4	76.4	76.4	58.958	542	542	0	320.46	By MS/MS	By MS/MS	By MS/MS	By MS/MS	By MS/MS	By MS/MS	42.8	57.9	47.4	70.3	74.5	68.3
P0A9C3	P0A9C3	4	4	4	Aldose 1-epimerase	galM	sp|P0A9C3|GALM_ECOLI Aldose 1-epimerase OS=Escherichia coli (strain K12) OX=83333 GN=galM PE=1 SV=1	1	4	4	4	2	2	3	2	3	1	2	2	3	2	3	1	2	2	3	2	3	1	18.2	18.2	18.2	38.19	346	346	0	8.5018	By MS/MS	By matching	By matching	By MS/MS	By MS/MS	By MS/MS	9	5.5	11.8	5.5	15.6	2.6
P0A9C5	P0A9C5	21	21	21	Glutamine synthetase	glnA	sp|P0A9C5|GLN1B_ECOLI Glutamine synthetase OS=Escherichia coli (strain K12) OX=83333 GN=glnA PE=1 SV=2	1	21	21	21	12	12	12	21	19	18	12	12	12	21	19	18	12	12	12	21	19	18	63.1	63.1	63.1	51.903	469	469	0	323.31	By MS/MS	By MS/MS	By MS/MS	By MS/MS	By MS/MS	By MS/MS	31.6	42	35.6	63.1	59.9	58.4
P0A9C9	P0A9C9	15	15	15	Fructose-1,6-bisphosphatase 1 class 2	glpX	sp|P0A9C9|GLPX_ECOLI Fructose-1,6-bisphosphatase 1 class 2 OS=Escherichia coli (strain K12) OX=83333 GN=glpX PE=1 SV=1	1	15	15	15	5	2	4	13	13	14	5	2	4	13	13	14	5	2	4	13	13	14	49.7	49.7	49.7	35.852	336	336	0	141.07	By matching	By matching	By MS/MS	By MS/MS	By MS/MS	By MS/MS	18.5	5.7	15.5	44.6	44.6	47.3
P0A9D2	P0A9D2	2	2	2	Glutathione S-transferase GstA	gstA	sp|P0A9D2|GSTA_ECOLI Glutathione S-transferase GstA OS=Escherichia coli (strain K12) OX=83333 GN=gstA PE=1 SV=1	1	2	2	2	0	0	0	1	2	2	0	0	0	1	2	2	0	0	0	1	2	2	13.9	13.9	13.9	22.868	201	201	0	5.1851				By MS/MS	By MS/MS	By MS/MS	0	0	0	8.5	13.9	13.9
P0A9D4	P0A9D4	10	10	10	Serine acetyltransferase	cysE	sp|P0A9D4|CYSE_ECOLI Serine acetyltransferase OS=Escherichia coli (strain K12) OX=83333 GN=cysE PE=1 SV=1	1	10	10	10	2	1	4	10	10	10	2	1	4	10	10	10	2	1	4	10	10	10	48	48	48	29.316	273	273	0	314.78	By MS/MS	By MS/MS	By MS/MS	By MS/MS	By MS/MS	By MS/MS	7	3.3	20.5	48	48	48
P0A9D8	P0A9D8	13	13	13	2,3,4,5-tetrahydropyridine-2,6-dicarboxylate N-succinyltransferase	dapD	sp|P0A9D8|DAPD_ECOLI 2,3,4,5-tetrahydropyridine-2,6-dicarboxylate N-succinyltransferase OS=Escherichia coli (strain K12) OX=83333 GN=dapD PE=1 SV=1	1	13	13	13	11	7	11	12	12	13	11	7	11	12	12	13	11	7	11	12	12	13	57.3	57.3	57.3	29.892	274	274	0	121.9	By MS/MS	By MS/MS	By MS/MS	By MS/MS	By MS/MS	By MS/MS	42.7	32.1	49.6	54.7	52.2	57.3
P0A9E5	P0A9E5	4	4	4	Fumarate and nitrate reduction regulatory protein	fnr	sp|P0A9E5|FNR_ECOLI Fumarate and nitrate reduction regulatory protein OS=Escherichia coli (strain K12) OX=83333 GN=fnr PE=1 SV=1	1	4	4	4	3	3	3	4	4	4	3	3	3	4	4	4	3	3	3	4	4	4	22	22	22	27.967	250	250	0	63.988	By matching	By MS/MS	By MS/MS	By MS/MS	By MS/MS	By MS/MS	17.6	14.8	14.8	22	22	22
P0A9F3	P0A9F3	4	4	4	HTH-type transcriptional regulator CysB	cysB	sp|P0A9F3|CYSB_ECOLI HTH-type transcriptional regulator CysB OS=Escherichia coli (strain K12) OX=83333 GN=cysB PE=3 SV=1	1	4	4	4	1	0	1	2	3	3	1	0	1	2	3	3	1	0	1	2	3	3	12	12	12	36.15	324	324	0	7.5846	By MS/MS		By matching	By matching	By MS/MS	By MS/MS	3.1	0	2.8	5.9	8	9.9
P0A9G6	P0A9G6	20	20	20	Isocitrate lyase	aceA	sp|P0A9G6|ACEA_ECOLI Isocitrate lyase OS=Escherichia coli (strain K12) OX=83333 GN=aceA PE=1 SV=1	1	20	20	20	18	18	16	18	19	18	18	18	16	18	19	18	18	18	16	18	19	18	64.3	64.3	64.3	47.521	434	434	0	323.31	By MS/MS	By MS/MS	By MS/MS	By MS/MS	By MS/MS	By MS/MS	57.1	62.7	51.2	57.1	60.6	62.4
P0A9G8	P0A9G8	5	5	5	Transcriptional regulator ModE	modE	sp|P0A9G8|MODE_ECOLI DNA-binding transcriptional dual regulator ModE OS=Escherichia coli (strain K12) OX=83333 GN=modE PE=1 SV=1	1	5	5	5	2	1	0	4	3	2	2	1	0	4	3	2	2	1	0	4	3	2	34	34	34	28.281	262	262	0	18.859	By matching	By matching		By MS/MS	By MS/MS	By MS/MS	6.9	3.8	0	26.3	22.5	14.9
P0A9H1	P0A9H1	4	4	4	G/U mismatch-specific DNA glycosylase	mug	sp|P0A9H1|MUG_ECOLI G/U mismatch-specific DNA glycosylase OS=Escherichia coli (strain K12) OX=83333 GN=mug PE=1 SV=1	1	4	4	4	2	4	2	3	4	3	2	4	2	3	4	3	2	4	2	3	4	3	25.6	25.6	25.6	18.673	168	168	0	9.6042	By MS/MS	By MS/MS	By MS/MS	By MS/MS	By MS/MS	By MS/MS	13.7	25.6	14.3	19.6	25.6	20.2
P0A9H3	P0A9H3	25	25	25	Lysine decarboxylase, inducible	cadA	sp|P0A9H3|LDCI_ECOLI Inducible lysine decarboxylase OS=Escherichia coli (strain K12) OX=83333 GN=cadA PE=1 SV=1	1	25	25	25	9	3	4	22	16	21	9	3	4	22	16	21	9	3	4	22	16	21	45.5	45.5	45.5	81.259	715	715	0	128.54	By MS/MS	By MS/MS	By MS/MS	By MS/MS	By MS/MS	By MS/MS	14.4	7	7.4	39.9	27.8	38.9
P0A9H7	P0A9H7	9	9	9	Cyclopropane-fatty-acyl-phospholipid synthase	cfa	sp|P0A9H7|CFA_ECOLI Cyclopropane-fatty-acyl-phospholipid synthase OS=Escherichia coli (strain K12) OX=83333 GN=cfa PE=1 SV=2	1	9	9	9	0	0	0	6	5	6	0	0	0	6	5	6	0	0	0	6	5	6	27	27	27	43.909	382	382	0	30.318				By MS/MS	By MS/MS	By MS/MS	0	0	0	17.3	16	18.1
P0A9J0	P0A9J0	8	8	8	Ribonuclease G	rng	sp|P0A9J0|RNG_ECOLI Ribonuclease G OS=Escherichia coli (strain K12) OX=83333 GN=rng PE=1 SV=2	1	8	8	8	0	1	1	5	5	3	0	1	1	5	5	3	0	1	1	5	5	3	21.1	21.1	21.1	55.364	489	489	0	72.746		By matching	By matching	By MS/MS	By MS/MS	By MS/MS	0	2	1.4	14.9	12.9	8.8
P0A9J6	P0A9J6	8	8	8	Ribokinase	rbsK	sp|P0A9J6|RBSK_ECOLI Ribokinase OS=Escherichia coli (strain K12) OX=83333 GN=rbsK PE=1 SV=1	1	8	8	8	3	4	4	8	6	7	3	4	4	8	6	7	3	4	4	8	6	7	39.2	39.2	39.2	32.29	309	309	0	187.69	By MS/MS	By MS/MS	By MS/MS	By MS/MS	By MS/MS	By MS/MS	9.4	14.2	14.9	39.2	25.9	35.3
P0A9J8	P0A9J8	6	6	6	P-protein;Chorismate mutase;Prephenate dehydratase	pheA	sp|P0A9J8|CMPDT_ECOLI Bifunctional chorismate mutase/prephenate dehydratase OS=Escherichia coli (strain K12) OX=83333 GN=pheA PE=1 SV=1	1	6	6	6	2	0	0	4	4	5	2	0	0	4	4	5	2	0	0	4	4	5	16.1	16.1	16.1	43.111	386	386	0	14.332	By matching			By MS/MS	By MS/MS	By MS/MS	4.7	0	0	10.9	10.9	13.5
P0A9K3	P0A9K3	11	11	11	PhoH-like protein	ybeZ	sp|P0A9K3|PHOL_ECOLI PhoH-like protein OS=Escherichia coli (strain K12) OX=83333 GN=ybeZ PE=1 SV=2	1	11	11	11	7	4	6	9	7	7	7	4	6	9	7	7	7	4	6	9	7	7	39.9	39.9	39.9	39.038	346	346	0	59.282	By MS/MS	By MS/MS	By MS/MS	By MS/MS	By MS/MS	By MS/MS	21.1	13.9	20.8	28	27.7	29.8
P0A9K7	P0A9K7	10	10	10	Phosphate-specific transport system accessory protein PhoU	phoU	sp|P0A9K7|PHOU_ECOLI Phosphate-specific transport system accessory protein PhoU OS=Escherichia coli (strain K12) OX=83333 GN=phoU PE=1 SV=1	1	10	10	10	1	0	0	7	8	7	1	0	0	7	8	7	1	0	0	7	8	7	55.6	55.6	55.6	27.417	241	241	0	40.064	By matching			By MS/MS	By MS/MS	By MS/MS	2.9	0	0	39.4	36.9	38.6
P0A9K9	P0A9K9	6	6	6	FKBP-type peptidyl-prolyl cis-trans isomerase SlyD	slyD	sp|P0A9K9|SLYD_ECOLI FKBP-type peptidyl-prolyl cis-trans isomerase SlyD OS=Escherichia coli (strain K12) OX=83333 GN=slyD PE=1 SV=1	1	6	6	6	6	5	6	6	6	6	6	5	6	6	6	6	6	5	6	6	6	6	67.3	67.3	67.3	20.853	196	196	0	293.43	By MS/MS	By MS/MS	By MS/MS	By MS/MS	By MS/MS	By MS/MS	67.3	46.4	67.3	67.3	67.3	67.3
P0A9L3	P0A9L3	7	7	7	FKBP-type 22 kDa peptidyl-prolyl cis-trans isomerase	fklB	sp|P0A9L3|FKBB_ECOLI FKBP-type 22 kDa peptidyl-prolyl cis-trans isomerase OS=Escherichia coli (strain K12) OX=83333 GN=fklB PE=1 SV=2	1	7	7	7	4	2	4	6	6	6	4	2	4	6	6	6	4	2	4	6	6	6	47.1	47.1	47.1	22.216	206	206	0	84.393	By MS/MS	By MS/MS	By MS/MS	By MS/MS	By MS/MS	By MS/MS	21.4	12.1	25.2	40.8	41.7	43.7
P0A9L5	P0A9L5	4	4	4	Peptidyl-prolyl cis-trans isomerase C	ppiC	sp|P0A9L5|PPIC_ECOLI Peptidyl-prolyl cis-trans isomerase C OS=Escherichia coli (strain K12) OX=83333 GN=ppiC PE=1 SV=2	1	4	4	4	3	2	2	3	4	4	3	2	2	3	4	4	3	2	2	3	4	4	55.9	55.9	55.9	10.232	93	93	0	21.245	By MS/MS	By MS/MS	By MS/MS	By MS/MS	By MS/MS	By MS/MS	45.2	19.4	19.4	45.2	55.9	55.9
P0A9L8	P0A9L8	10	10	10	Pyrroline-5-carboxylate reductase	proC	sp|P0A9L8|P5CR_ECOLI Pyrroline-5-carboxylate reductase OS=Escherichia coli (strain K12) OX=83333 GN=proC PE=1 SV=1	1	10	10	10	3	2	1	10	9	9	3	2	1	10	9	9	3	2	1	10	9	9	66.9	66.9	66.9	28.145	269	269	0	266.29	By matching	By matching	By matching	By MS/MS	By MS/MS	By MS/MS	13	8.2	3.3	66.9	55.4	55.4
P0A9M0	P0A9M0	34	34	34	Lon protease	lon	sp|P0A9M0|LON_ECOLI Lon protease OS=Escherichia coli (strain K12) OX=83333 GN=lon PE=1 SV=1	1	34	34	34	21	11	21	29	29	29	21	11	21	29	29	29	21	11	21	29	29	29	52.9	52.9	52.9	87.437	784	784	0	323.31	By MS/MS	By MS/MS	By MS/MS	By MS/MS	By MS/MS	By MS/MS	33.5	15.3	32	46	45.5	44.4
P0A9M2	P0A9M2	7	7	7	Hypoxanthine phosphoribosyltransferase	hpt	sp|P0A9M2|HPRT_ECOLI Hypoxanthine phosphoribosyltransferase OS=Escherichia coli (strain K12) OX=83333 GN=hpt PE=1 SV=1	1	7	7	7	5	3	3	5	4	5	5	3	3	5	4	5	5	3	3	5	4	5	39.3	39.3	39.3	20.115	178	178	0	89.728	By MS/MS	By MS/MS	By MS/MS	By MS/MS	By MS/MS	By MS/MS	32	20.8	24.2	32	18.5	25.8
P0A9M5	P0A9M5	3	3	3	Xanthine phosphoribosyltransferase	gpt	sp|P0A9M5|XGPT_ECOLI Xanthine-guanine phosphoribosyltransferase OS=Escherichia coli (strain K12) OX=83333 GN=gpt PE=1 SV=1	1	3	3	3	2	1	1	1	1	3	2	1	1	1	1	3	2	1	1	1	1	3	26.3	26.3	26.3	16.97	152	152	0	6.9284	By MS/MS	By MS/MS	By MS/MS	By MS/MS	By MS/MS	By MS/MS	17.8	7.2	7.2	10.5	7.2	26.3
P0A9M8	P0A9M8	33	33	33	Phosphate acetyltransferase	pta	sp|P0A9M8|PTA_ECOLI Phosphate acetyltransferase OS=Escherichia coli (strain K12) OX=83333 GN=pta PE=1 SV=2	1	33	33	33	19	19	19	31	32	31	19	19	19	31	32	31	19	19	19	31	32	31	66.9	66.9	66.9	77.171	714	714	0	323.31	By MS/MS	By MS/MS	By MS/MS	By MS/MS	By MS/MS	By MS/MS	31.2	31.2	32.9	64.7	61.1	58.4
P0A9N4	P0A9N4	5	5	5	Pyruvate formate-lyase 1-activating enzyme	pflA	sp|P0A9N4|PFLA_ECOLI Pyruvate formate-lyase 1-activating enzyme OS=Escherichia coli (strain K12) OX=83333 GN=pflA PE=1 SV=2	1	5	5	5	1	0	1	3	3	4	1	0	1	3	3	4	1	0	1	3	3	4	24.8	24.8	24.8	28.204	246	246	0	22.514	By MS/MS		By matching	By MS/MS	By MS/MS	By MS/MS	4.5	0	4.5	14.6	14.6	18.3
P0A9P0	P0A9P0	19	19	19	Dihydrolipoyl dehydrogenase	lpdA	sp|P0A9P0|DLDH_ECOLI Dihydrolipoyl dehydrogenase OS=Escherichia coli (strain K12) OX=83333 GN=lpdA PE=1 SV=2	1	19	19	19	18	18	19	19	19	19	18	18	19	19	19	19	18	18	19	19	19	19	52.7	52.7	52.7	50.688	474	474	0	323.31	By MS/MS	By MS/MS	By MS/MS	By MS/MS	By MS/MS	By MS/MS	50.4	52.7	52.7	52.7	52.7	52.7
P0A9P4	P0A9P4	11	11	11	Thioredoxin reductase	trxB	sp|P0A9P4|TRXB_ECOLI Thioredoxin reductase OS=Escherichia coli (strain K12) OX=83333 GN=trxB PE=1 SV=2	1	11	11	11	3	2	3	8	11	7	3	2	3	8	11	7	3	2	3	8	11	7	57.6	57.6	57.6	34.623	321	321	0	85.962	By MS/MS	By MS/MS	By MS/MS	By MS/MS	By MS/MS	By MS/MS	10	7.8	15.3	43.6	57.6	35.5
P0A9P6	P0A9P6	24	24	24	ATP-dependent RNA helicase DeaD	deaD	sp|P0A9P6|DEAD_ECOLI ATP-dependent RNA helicase DeaD OS=Escherichia coli (strain K12) OX=83333 GN=deaD PE=1 SV=2	1	24	24	24	17	14	15	24	23	23	17	14	15	24	23	23	17	14	15	24	23	23	55.3	55.3	55.3	70.545	629	629	0	323.31	By MS/MS	By MS/MS	By MS/MS	By MS/MS	By MS/MS	By MS/MS	36.7	30.2	32.6	55.3	50.2	50.2
P0A9Q1	P0A9Q1	8	8	8	Aerobic respiration control protein ArcA	arcA	sp|P0A9Q1|ARCA_ECOLI Aerobic respiration control protein ArcA OS=Escherichia coli (strain K12) OX=83333 GN=arcA PE=1 SV=1	1	8	8	8	6	6	5	8	8	7	6	6	5	8	8	7	6	6	5	8	8	7	43.7	43.7	43.7	27.292	238	238	0	82.334	By MS/MS	By MS/MS	By MS/MS	By MS/MS	By MS/MS	By MS/MS	34.5	36.1	31.5	43.7	43.7	39.1
P0A9Q5	P0A9Q5	13	13	13	Acetyl-coenzyme A carboxylase carboxyl transferase subunit beta	accD	sp|P0A9Q5|ACCD_ECOLI Acetyl-coenzyme A carboxylase carboxyl transferase subunit beta OS=Escherichia coli (strain K12) OX=83333 GN=accD PE=1 SV=1	1	13	13	13	8	8	8	13	12	13	8	8	8	13	12	13	8	8	8	13	12	13	48.7	48.7	48.7	33.322	304	304	0	144.67	By MS/MS	By MS/MS	By MS/MS	By MS/MS	By MS/MS	By MS/MS	29.3	29.3	29.3	48.7	46.4	48.7
P0A9Q7	P0A9Q7	48	48	48	Aldehyde-alcohol dehydrogenase;Alcohol dehydrogenase;Acetaldehyde dehydrogenase [acetylating];Pyruvate-formate-lyase deactivase	adhE	sp|P0A9Q7|ADHE_ECOLI Aldehyde-alcohol dehydrogenase OS=Escherichia coli (strain K12) OX=83333 GN=adhE PE=1 SV=2	1	48	48	48	32	33	34	41	45	42	32	33	34	41	45	42	32	33	34	41	45	42	68	68	68	96.126	891	891	0	323.31	By MS/MS	By MS/MS	By MS/MS	By MS/MS	By MS/MS	By MS/MS	52.7	53.8	51.9	60.4	65.1	62.4
P0A9Q9	P0A9Q9	9	9	9	Aspartate-semialdehyde dehydrogenase	asd	sp|P0A9Q9|DHAS_ECOLI Aspartate-semialdehyde dehydrogenase OS=Escherichia coli (strain K12) OX=83333 GN=asd PE=1 SV=1	1	9	9	9	5	5	2	7	7	8	5	5	2	7	7	8	5	5	2	7	7	8	41.4	41.4	41.4	40.017	367	367	0	212.92	By MS/MS	By MS/MS	By MS/MS	By MS/MS	By MS/MS	By MS/MS	20.7	24.8	9	32.4	30.5	39
P0A9R7	P0A9R7	5	5	5	Cell division ATP-binding protein FtsE	ftsE	sp|P0A9R7|FTSE_ECOLI Cell division ATP-binding protein FtsE OS=Escherichia coli (strain K12) OX=83333 GN=ftsE PE=1 SV=1	1	5	5	5	1	1	2	4	3	3	1	1	2	4	3	3	1	1	2	4	3	3	31.5	31.5	31.5	24.439	222	222	0	39.768	By matching	By matching	By matching	By MS/MS	By MS/MS	By MS/MS	12.6	3.2	9	31.1	18.9	18.5
P0A9S5	P0A9S5	11	11	11	Glycerol dehydrogenase	gldA	sp|P0A9S5|GLDA_ECOLI Glycerol dehydrogenase OS=Escherichia coli (strain K12) OX=83333 GN=gldA PE=1 SV=1	1	11	11	11	7	6	2	10	10	11	7	6	2	10	10	11	7	6	2	10	10	11	51.5	51.5	51.5	38.712	367	367	0	165.44	By MS/MS	By MS/MS	By MS/MS	By MS/MS	By MS/MS	By MS/MS	26.2	21.5	7.1	45.5	48.2	51.5
P0A9T4	P0A9T4	2	2	2	Protein tas	tas	sp|P0A9T4|TAS_ECOLI Protein tas OS=Escherichia coli (strain K12) OX=83333 GN=tas PE=1 SV=1	1	2	2	2	1	0	0	0	1	0	1	0	0	0	1	0	1	0	0	0	1	0	6.9	6.9	6.9	38.499	346	346	0	4.9907	By MS/MS				By MS/MS		2.9	0	0	0	4	0
P0A9U3	P0A9U3	14	14	14	Uncharacterized ABC transporter ATP-binding protein YbiT	ybiT	sp|P0A9U3|YBIT_ECOLI Probable ATP-binding protein YbiT OS=Escherichia coli (strain K12) OX=83333 GN=ybiT PE=1 SV=1	1	14	14	14	1	3	3	7	10	12	1	3	3	7	10	12	1	3	3	7	10	12	38.5	38.5	38.5	59.857	530	530	0	110.55	By matching	By MS/MS	By matching	By MS/MS	By MS/MS	By MS/MS	3.8	7.5	7.4	18.9	29.8	34.2
P0A9V1	P0A9V1	7	7	7	Lipopolysaccharide export system ATP-binding protein LptB	lptB	sp|P0A9V1|LPTB_ECOLI Lipopolysaccharide export system ATP-binding protein LptB OS=Escherichia coli (strain K12) OX=83333 GN=lptB PE=1 SV=2	1	7	7	7	3	1	2	5	3	5	3	1	2	5	3	5	3	1	2	5	3	5	44	44	44	26.8	241	241	0	38.127	By MS/MS	By MS/MS	By MS/MS	By MS/MS	By MS/MS	By MS/MS	19.5	8.3	13.7	33.2	19.9	30.3
P0A9W0	P0A9W0	5	5	5	HTH-type transcriptional regulator UlaR	ulaR	sp|P0A9W0|ULAR_ECOLI HTH-type transcriptional regulator UlaR OS=Escherichia coli (strain K12) OX=83333 GN=ulaR PE=1 SV=1	1	5	5	5	0	0	0	4	2	2	0	0	0	4	2	2	0	0	0	4	2	2	23.5	23.5	23.5	27.602	251	251	0	24.911				By MS/MS	By MS/MS	By MS/MS	0	0	0	19.1	11.2	12
P0A9W3	P0A9W3	31	31	31	Energy-dependent translational throttle protein EttA	ettA	sp|P0A9W3|ETTA_ECOLI Energy-dependent translational throttle protein EttA OS=Escherichia coli (strain K12) OX=83333 GN=ettA PE=1 SV=2	1	31	31	31	15	10	18	24	25	29	15	10	18	24	25	29	15	10	18	24	25	29	71.4	71.4	71.4	62.442	555	555	0	323.31	By MS/MS	By MS/MS	By MS/MS	By MS/MS	By MS/MS	By MS/MS	38.4	25.4	42.5	59.6	61.6	65.4
P0A9W6	P0A9W6	1	1	1	Acid stress protein IbaG	ibaG	sp|P0A9W6|IBAG_ECOLI Acid stress protein IbaG OS=Escherichia coli (strain K12) OX=83333 GN=ibaG PE=1 SV=1	1	1	1	1	1	1	1	1	1	1	1	1	1	1	1	1	1	1	1	1	1	1	10.7	10.7	10.7	9.4516	84	84	0.0047978	3.046	By MS/MS	By MS/MS	By matching	By MS/MS	By MS/MS	By MS/MS	10.7	10.7	10.7	10.7	10.7	10.7
P0A9W9	P0A9W9	3	3	3	Protein YrdA	yrdA	sp|P0A9W9|YRDA_ECOLI Protein YrdA OS=Escherichia coli (strain K12) OX=83333 GN=yrdA PE=1 SV=1	1	3	3	3	2	1	1	2	0	0	2	1	1	2	0	0	2	1	1	2	0	0	20.7	20.7	20.7	20.245	184	184	0	10.563	By MS/MS	By MS/MS	By MS/MS	By matching			13	7.6	7.1	13	0	0
P0A9X1	P0A9X1	3	3	3	Zinc import ATP-binding protein ZnuC	znuC	sp|P0A9X1|ZNUC_ECOLI Zinc import ATP-binding protein ZnuC OS=Escherichia coli (strain K12) OX=83333 GN=znuC PE=1 SV=1	1	3	3	3	0	0	0	3	0	2	0	0	0	3	0	2	0	0	0	3	0	2	15.5	15.5	15.5	27.867	251	251	0	9.485				By MS/MS		By MS/MS	0	0	0	15.5	0	10.4
P0A9X4	P0A9X4	15	15	15	Rod shape-determining protein MreB	mreB	sp|P0A9X4|MREB_ECOLI Cell shape-determining protein MreB OS=Escherichia coli (strain K12) OX=83333 GN=mreB PE=1 SV=1	1	15	15	15	8	8	10	15	12	14	8	8	10	15	12	14	8	8	10	15	12	14	48.4	48.4	48.4	36.952	347	347	0	248.3	By MS/MS	By MS/MS	By MS/MS	By MS/MS	By MS/MS	By MS/MS	28.2	28	33.1	48.4	44.4	47
P0A9X9	P0A9X9	4	4	3	Cold shock protein CspA	cspA	sp|P0A9X9|CSPA_ECOLI Cold shock protein CspA OS=Escherichia coli (strain K12) OX=83333 GN=cspA PE=1 SV=2	1	4	4	3	4	4	4	4	4	3	4	4	4	4	4	3	3	3	3	3	3	2	67.1	67.1	50	7.4032	70	70	0	38.157	By MS/MS	By MS/MS	By MS/MS	By MS/MS	By MS/MS	By MS/MS	67.1	67.1	67.1	67.1	67.1	52.9
P0A9Y6	P0A9Y6	4	4	4	Cold shock-like protein CspC	cspC	sp|P0A9Y6|CSPC_ECOLI Cold shock-like protein CspC OS=Escherichia coli (strain K12) OX=83333 GN=cspC PE=1 SV=2	1	4	4	4	4	3	4	3	4	2	4	3	4	3	4	2	4	3	4	3	4	2	78.3	78.3	78.3	7.4023	69	69	0	59.374	By MS/MS	By MS/MS	By MS/MS	By MS/MS	By MS/MS	By MS/MS	78.3	60.9	78.3	60.9	78.3	39.1
P0A9Z1	P0A9Z1	4	4	4	Nitrogen regulatory protein P-II 1	glnB	sp|P0A9Z1|GLNB_ECOLI Nitrogen regulatory protein P-II 1 OS=Escherichia coli (strain K12) OX=83333 GN=glnB PE=1 SV=1	1	4	4	4	3	1	2	4	1	2	3	1	2	4	1	2	3	1	2	4	1	2	31.2	31.2	31.2	12.425	112	112	0	7.9507	By matching	By MS/MS	By MS/MS	By MS/MS	By MS/MS	By MS/MS	21.4	7.1	13.4	31.2	7.1	13.4
P0AA04	P0AA04	3	3	3	Phosphocarrier protein HPr	ptsH	sp|P0AA04|PTHP_ECOLI Phosphocarrier protein HPr OS=Escherichia coli (strain K12) OX=83333 GN=ptsH PE=1 SV=1	1	3	3	3	2	3	2	3	3	3	2	3	2	3	3	3	2	3	2	3	3	3	62.4	62.4	62.4	9.1193	85	85	0	66.043	By MS/MS	By MS/MS	By MS/MS	By MS/MS	By MS/MS	By MS/MS	35.3	62.4	35.3	62.4	62.4	62.4
P0AA10	P0AA10	7	7	7	50S ribosomal protein L13	rplM	sp|P0AA10|RL13_ECOLI 50S ribosomal protein L13 OS=Escherichia coli (strain K12) OX=83333 GN=rplM PE=1 SV=1	1	7	7	7	7	7	6	7	7	6	7	7	6	7	7	6	7	7	6	7	7	6	58.5	58.5	58.5	16.018	142	142	0	108.09	By MS/MS	By MS/MS	By MS/MS	By MS/MS	By MS/MS	By MS/MS	58.5	58.5	49.3	58.5	58.5	49.3
P0AA16	P0AA16	11	11	11	Transcriptional regulatory protein OmpR	ompR	sp|P0AA16|OMPR_ECOLI DNA-binding dual transcriptional regulator OmpR OS=Escherichia coli (strain K12) OX=83333 GN=ompR PE=1 SV=1	1	11	11	11	5	5	4	10	10	8	5	5	4	10	10	8	5	5	4	10	10	8	57.7	57.7	57.7	27.353	239	239	0	82.646	By MS/MS	By MS/MS	By MS/MS	By MS/MS	By MS/MS	By MS/MS	28	23.4	23.8	51.9	50.2	42.7
P0AA25	P0AA25	4	4	4	Thioredoxin-1	trxA	sp|P0AA25|THIO_ECOLI Thioredoxin 1 OS=Escherichia coli (strain K12) OX=83333 GN=trxA PE=1 SV=2	1	4	4	4	4	3	4	4	4	4	4	3	4	4	4	4	4	3	4	4	4	4	47.7	47.7	47.7	11.806	109	109	0	24.047	By MS/MS	By MS/MS	By MS/MS	By MS/MS	By MS/MS	By MS/MS	47.7	39.4	47.7	47.7	47.7	47.7
P0AA39	P0AA39	14	14	14	Ribosomal large subunit pseudouridine synthase C	rluC	sp|P0AA39|RLUC_ECOLI Ribosomal large subunit pseudouridine synthase C OS=Escherichia coli (strain K12) OX=83333 GN=rluC PE=1 SV=1	1	14	14	14	7	2	2	10	10	11	7	2	2	10	10	11	7	2	2	10	10	11	39.8	39.8	39.8	36.026	319	319	0	49.275	By MS/MS	By MS/MS	By MS/MS	By MS/MS	By MS/MS	By MS/MS	21.9	6.3	7.2	30.1	27.9	32.3
P0AA43	P0AA43	4	4	4	Ribosomal small subunit pseudouridine synthase A	rsuA	sp|P0AA43|RSUA_ECOLI Ribosomal small subunit pseudouridine synthase A OS=Escherichia coli (strain K12) OX=83333 GN=rsuA PE=1 SV=1	1	4	4	4	1	2	1	2	1	2	1	2	1	2	1	2	1	2	1	2	1	2	17.7	17.7	17.7	25.865	231	231	0	9.1998	By matching	By MS/MS	By MS/MS	By MS/MS	By MS/MS	By MS/MS	4.3	11.7	4.3	10.4	7.4	8.2
P0AA47	P0AA47	4	4	4	Low-affinity putrescine importer PlaP	plaP	sp|P0AA47|PLAP_ECOLI Low-affinity putrescine importer PlaP OS=Escherichia coli (strain K12) OX=83333 GN=plaP PE=1 SV=1	1	4	4	4	2	2	1	2	2	2	2	2	1	2	2	2	2	2	1	2	2	2	11.1	11.1	11.1	49.537	452	452	0	9.5385	By matching	By MS/MS	By matching	By MS/MS	By MS/MS	By MS/MS	6.2	4.9	4	4.2	6.2	6
P0AA53	P0AA53	1	1	1	Protein QmcA	qmcA	sp|P0AA53|QMCA_ECOLI Protein QmcA OS=Escherichia coli (strain K12) OX=83333 GN=qmcA PE=1 SV=1	1	1	1	1	0	0	0	0	1	0	0	0	0	0	1	0	0	0	0	0	1	0	3.3	3.3	3.3	33.743	305	305	0.0027567	3.1388					By MS/MS		0	0	0	0	3.3	0
P0AAA1	P0AAA1	2	2	2	Inner membrane protein YagU	yagU	sp|P0AAA1|YAGU_ECOLI Inner membrane protein YagU OS=Escherichia coli (strain K12) OX=83333 GN=yagU PE=1 SV=1	1	2	2	2	0	0	1	0	0	2	0	0	1	0	0	2	0	0	1	0	0	2	13.7	13.7	13.7	22.967	204	204	0	4.7652			By matching			By MS/MS	0	0	8.3	0	0	13.7
P0AAB4	P0AAB4	11	11	11	3-octaprenyl-4-hydroxybenzoate carboxy-lyase	ubiD	sp|P0AAB4|UBID_ECOLI 3-octaprenyl-4-hydroxybenzoate carboxy-lyase OS=Escherichia coli (strain K12) OX=83333 GN=ubiD PE=1 SV=1	1	11	11	11	3	2	6	8	8	10	3	2	6	8	8	10	3	2	6	8	8	10	35	35	35	55.603	497	497	0	184.93	By MS/MS	By MS/MS	By MS/MS	By MS/MS	By MS/MS	By MS/MS	7.2	6	14.5	26.6	29.6	31.4
P0AAB6	P0AAB6	14	14	14	UTP--glucose-1-phosphate uridylyltransferase	galF	sp|P0AAB6|GALF_ECOLI UTP--glucose-1-phosphate uridylyltransferase OS=Escherichia coli (strain K12) OX=83333 GN=galF PE=1 SV=1	1	14	14	14	5	3	2	14	13	12	5	3	2	14	13	12	5	3	2	14	13	12	76.8	76.8	76.8	32.829	297	297	0	323.31	By MS/MS	By MS/MS	By MS/MS	By MS/MS	By MS/MS	By MS/MS	21.2	16.8	11.8	76.8	72.4	65.3
P0AAC0	P0AAC0	9	9	9	Universal stress protein E	uspE	sp|P0AAC0|USPE_ECOLI Universal stress protein E OS=Escherichia coli (strain K12) OX=83333 GN=uspE PE=1 SV=2	1	9	9	9	1	1	5	3	6	7	1	1	5	3	6	7	1	1	5	3	6	7	45.6	45.6	45.6	35.706	316	316	0	65.07	By MS/MS	By MS/MS	By MS/MS	By MS/MS	By MS/MS	By MS/MS	6.3	6.3	20.6	18.4	34.2	35.4
P0AAC4	P0AAC4	1	1	1	Inner membrane protein YbhL	ybhL	sp|P0AAC4|YBHL_ECOLI Inner membrane protein YbhL OS=Escherichia coli (strain K12) OX=83333 GN=ybhL PE=1 SV=1	1	1	1	1	1	1	1	0	1	1	1	1	1	0	1	1	1	1	1	0	1	1	3.4	3.4	3.4	25.902	234	234	0.0060565	2.8482	By matching	By MS/MS	By matching		By MS/MS	By matching	3.4	3.4	3.4	0	3.4	3.4
P0AAC8	P0AAC8	5	5	5	Iron-binding protein IscA	iscA	sp|P0AAC8|ISCA_ECOLI Iron-binding protein IscA OS=Escherichia coli (strain K12) OX=83333 GN=iscA PE=1 SV=1	1	5	5	5	3	2	3	4	3	5	3	2	3	4	3	5	3	2	3	4	3	5	47.7	47.7	47.7	11.556	107	107	0	15.729	By MS/MS	By matching	By MS/MS	By MS/MS	By MS/MS	By MS/MS	30.8	16.8	27.1	37.4	29.9	47.7
P0AAD6	P0AAD6	7	7	7	Serine transporter	sdaC	sp|P0AAD6|SDAC_ECOLI Serine transporter SdaC OS=Escherichia coli (strain K12) OX=83333 GN=sdaC PE=1 SV=1	1	7	7	7	6	6	6	6	7	7	6	6	6	6	7	7	6	6	6	6	7	7	16.3	16.3	16.3	46.906	429	429	0	84.046	By MS/MS	By MS/MS	By MS/MS	By MS/MS	By MS/MS	By MS/MS	16.3	16.3	14	16.3	16.3	16.3
P0AAD8	P0AAD8	2	2	2	Threonine/serine transporter TdcC	tdcC	sp|P0AAD8|TDCC_ECOLI Threonine/serine transporter TdcC OS=Escherichia coli (strain K12) OX=83333 GN=tdcC PE=1 SV=1	1	2	2	2	1	2	1	1	2	1	1	2	1	1	2	1	1	2	1	1	2	1	7.7	7.7	7.7	48.878	443	443	0	28.771	By MS/MS	By MS/MS	By MS/MS	By MS/MS	By MS/MS	By MS/MS	2.7	7.7	2.7	2.7	7.7	2.7
P0AAE0	P0AAE0	1	1	1	D-serine/D-alanine/glycine transporter	cycA	sp|P0AAE0|CYCA_ECOLI D-serine/D-alanine/glycine transporter OS=Escherichia coli (strain K12) OX=83333 GN=cycA PE=1 SV=1	1	1	1	1	0	0	1	1	1	1	0	0	1	1	1	1	0	0	1	1	1	1	3	3	3	51.659	470	470	0	4.9839			By matching	By MS/MS	By MS/MS	By MS/MS	0	0	3	3	3	3
P0AAE8	P0AAE8	1	1	1	Probable cadaverine/lysine antiporter	cadB	sp|P0AAE8|CADB_ECOLI Probable cadaverine/lysine antiporter OS=Escherichia coli (strain K12) OX=83333 GN=cadB PE=1 SV=1	1	1	1	1	0	0	0	0	1	0	0	0	0	0	1	0	0	0	0	0	1	0	2.7	2.7	2.7	46.665	444	444	0	3.9311					By MS/MS		0	0	0	0	2.7	0
P0AAF6	P0AAF6	5	5	5	Arginine transport ATP-binding protein ArtP	artP	sp|P0AAF6|ARTP_ECOLI Arginine transport ATP-binding protein ArtP OS=Escherichia coli (strain K12) OX=83333 GN=artP PE=1 SV=1	1	5	5	5	0	0	1	3	3	2	0	0	1	3	3	2	0	0	1	3	3	2	36	36	36	27.022	242	242	0	27.983			By matching	By MS/MS	By MS/MS	By MS/MS	0	0	8.3	24.8	18.2	13.2
P0AAG5	P0AAG5	2	2	2	Multidrug resistance-like ATP-binding protein MdlB	mdlB	sp|P0AAG5|MDLB_ECOLI Multidrug resistance-like ATP-binding protein MdlB OS=Escherichia coli (strain K12) OX=83333 GN=mdlB PE=1 SV=1	1	2	2	2	1	1	1	1	2	1	1	1	1	1	2	1	1	1	1	1	2	1	3	3	3	65.222	593	593	0.0097847	2.383	By MS/MS	By MS/MS	By MS/MS	By MS/MS	By MS/MS	By MS/MS	1.5	1.5	1.5	1.5	3	1.5
P0AAG8	P0AAG8	23	23	23	Galactose/methyl galactoside import ATP-binding protein MglA	mglA	sp|P0AAG8|MGLA_ECOLI Galactose/methyl galactoside import ATP-binding protein MglA OS=Escherichia coli (strain K12) OX=83333 GN=mglA PE=1 SV=1	1	23	23	23	4	4	3	16	18	13	4	4	3	16	18	13	4	4	3	16	18	13	53.8	53.8	53.8	56.415	506	506	0	130.86	By matching	By MS/MS	By matching	By MS/MS	By MS/MS	By MS/MS	8.9	10.5	5.7	40.9	38.9	30.8
P0AAH0	P0AAH0	4	4	4	Phosphate import ATP-binding protein PstB	pstB	sp|P0AAH0|PSTB_ECOLI Phosphate import ATP-binding protein PstB OS=Escherichia coli (strain K12) OX=83333 GN=pstB PE=1 SV=2	1	4	4	4	1	0	1	4	2	2	1	0	1	4	2	2	1	0	1	4	2	2	25.3	25.3	25.3	29.027	257	257	0	15.638	By matching		By matching	By MS/MS	By MS/MS	By MS/MS	3.1	0	9.7	25.3	12.8	12.8
P0AAI3	P0AAI3	28	28	28	ATP-dependent zinc metalloprotease FtsH	ftsH	sp|P0AAI3|FTSH_ECOLI ATP-dependent zinc metalloprotease FtsH OS=Escherichia coli (strain K12) OX=83333 GN=ftsH PE=1 SV=1	1	28	28	28	17	18	14	27	28	25	17	18	14	27	28	25	17	18	14	27	28	25	53.7	53.7	53.7	70.707	644	644	0	323.31	By MS/MS	By MS/MS	By MS/MS	By MS/MS	By MS/MS	By MS/MS	33.9	36	26.1	50.2	53.7	48.9
P0AAI5	P0AAI5	11	11	11	3-oxoacyl-[acyl-carrier-protein] synthase 2	fabF	sp|P0AAI5|FABF_ECOLI 3-oxoacyl-[acyl-carrier-protein] synthase 2 OS=Escherichia coli (strain K12) OX=83333 GN=fabF PE=1 SV=2	1	11	11	11	6	8	8	10	11	11	6	8	8	10	11	11	6	8	8	10	11	11	50.1	50.1	50.1	43.045	413	413	0	279.9	By MS/MS	By MS/MS	By MS/MS	By MS/MS	By MS/MS	By MS/MS	25.4	36.3	35.6	46	50.1	50.1
P0AAI9	P0AAI9	8	8	8	Malonyl CoA-acyl carrier protein transacylase	fabD	sp|P0AAI9|FABD_ECOLI Malonyl CoA-acyl carrier protein transacylase OS=Escherichia coli (strain K12) OX=83333 GN=fabD PE=1 SV=2	1	8	8	8	6	7	3	8	7	8	6	7	3	8	7	8	6	7	3	8	7	8	50.8	50.8	50.8	32.417	309	309	0	196.76	By MS/MS	By MS/MS	By MS/MS	By MS/MS	By MS/MS	By MS/MS	37.2	45.3	20.1	50.8	43.4	50.8
P0AAJ5	P0AAJ5	7	7	7	Formate dehydrogenase-O iron-sulfur subunit	fdoH	sp|P0AAJ5|FDOH_ECOLI Formate dehydrogenase-O iron-sulfur subunit OS=Escherichia coli (strain K12) OX=83333 GN=fdoH PE=1 SV=1	1	7	7	7	3	3	2	4	5	5	3	3	2	4	5	5	3	3	2	4	5	5	26.7	26.7	26.7	33.1	300	300	0	22.732	By MS/MS	By MS/MS	By matching	By MS/MS	By MS/MS	By MS/MS	10	11.7	8	13.7	20.3	20.3
P0AAJ8	P0AAJ8	2	2	2	Hydrogenase-2 operon protein HybA	hybA	sp|P0AAJ8|HYBA_ECOLI Hydrogenase-2 operon protein HybA OS=Escherichia coli (strain K12) OX=83333 GN=hybA PE=3 SV=1	1	2	2	2	0	0	0	1	1	2	0	0	0	1	1	2	0	0	0	1	1	2	9.5	9.5	9.5	36.003	328	328	0	9.1048				By MS/MS	By MS/MS	By MS/MS	0	0	0	6.7	6.7	9.5
P0AAN3	P0AAN3	6	6	6	Hydrogenase isoenzymes nickel incorporation protein HypB	hypB	sp|P0AAN3|HYPB_ECOLI Hydrogenase maturation factor HypB OS=Escherichia coli (strain K12) OX=83333 GN=hypB PE=1 SV=1	1	6	6	6	4	3	4	4	4	4	4	3	4	4	4	4	4	3	4	4	4	4	31	31	31	31.565	290	290	0	33.694	By MS/MS	By MS/MS	By MS/MS	By MS/MS	By MS/MS	By MS/MS	19	13.8	19	19	21.4	19.7
P0AAP3	P0AAP3	3	3	3	Transcriptional repressor FrmR	frmR	sp|P0AAP3|FRMR_ECOLI Transcriptional repressor FrmR OS=Escherichia coli (strain K12) OX=83333 GN=frmR PE=1 SV=1	1	3	3	3	3	2	0	2	1	2	3	2	0	2	1	2	3	2	0	2	1	2	35.2	35.2	35.2	10.318	91	91	0	9.414	By MS/MS	By MS/MS		By matching	By matching	By MS/MS	35.2	24.2	0	19.8	8.8	19.8
P0AAQ2	P0AAQ2	1	1	1	Uncharacterized protein YajD	yajD	sp|P0AAQ2|YAJD_ECOLI Putative HNH nuclease YajD OS=Escherichia coli (strain K12) OX=83333 GN=yajD PE=3 SV=1	1	1	1	1	1	1	1	1	1	1	1	1	1	1	1	1	1	1	1	1	1	1	7	7	7	13.364	115	115	0.0060443	2.7929	By MS/MS	By MS/MS	By MS/MS	By MS/MS	By matching	By matching	7	7	7	7	7	7
P0AAQ6	P0AAQ6	1	1	1	Uncharacterized protein YbaA	ybaA	sp|P0AAQ6|YBAA_ECOLI Uncharacterized protein YbaA OS=Escherichia coli (strain K12) OX=83333 GN=ybaA PE=4 SV=1	1	1	1	1	0	0	0	1	1	1	0	0	0	1	1	1	0	0	0	1	1	1	11.1	11.1	11.1	13.318	117	117	0	4.5935				By matching	By MS/MS	By MS/MS	0	0	0	11.1	11.1	11.1
P0AAR3	P0AAR3	4	4	4	Cys-tRNA(Pro)/Cys-tRNA(Cys) deacylase YbaK	ybaK	sp|P0AAR3|YBAK_ECOLI Cys-tRNA(Pro)/Cys-tRNA(Cys) deacylase YbaK OS=Escherichia coli (strain K12) OX=83333 GN=ybaK PE=1 SV=1	1	4	4	4	1	3	2	0	2	2	1	3	2	0	2	2	1	3	2	0	2	2	37.1	37.1	37.1	17.093	159	159	0	10.986	By MS/MS	By MS/MS	By matching		By MS/MS	By MS/MS	9.4	27.7	19.5	0	19.5	19.5
P0AAS0	P0AAS0	5	5	5	Inner membrane protein YlaC	ylaC	sp|P0AAS0|YLAC_ECOLI Inner membrane protein YlaC OS=Escherichia coli (strain K12) OX=83333 GN=ylaC PE=1 SV=2	1	5	5	5	3	1	3	3	4	5	3	1	3	3	4	5	3	1	3	3	4	5	35.3	35.3	35.3	18.267	156	156	0	70.996	By MS/MS	By MS/MS	By MS/MS	By MS/MS	By MS/MS	By MS/MS	23.7	7.7	23.7	23.7	28.2	35.3
P0AAS7	P0AAS7	1	1	1	Uncharacterized protein YbcJ	ybcJ	sp|P0AAS7|YBCJ_ECOLI Uncharacterized protein YbcJ OS=Escherichia coli (strain K12) OX=83333 GN=ybcJ PE=1 SV=1	1	1	1	1	1	0	1	1	1	1	1	0	1	1	1	1	1	0	1	1	1	1	17.1	17.1	17.1	7.3895	70	70	0.0072512	2.5464	By matching		By matching	By MS/MS	By MS/MS	By MS/MS	17.1	0	17.1	17.1	17.1	17.1
P0AAT6	P0AAT6	2	2	2	Ribosomal silencing factor RsfS	rsfS	sp|P0AAT6|IOJAP_ECOLI Ribosomal silencing factor RsfS OS=Escherichia coli (strain K12) OX=83333 GN=rsfS PE=1 SV=1	1	2	2	2	2	2	1	2	2	2	2	2	1	2	2	2	2	2	1	2	2	2	20	20	20	11.582	105	105	0	11.806	By MS/MS	By MS/MS	By MS/MS	By MS/MS	By MS/MS	By MS/MS	20	20	11.4	20	20	20
P0AAT9	P0AAT9	4	4	4	Uncharacterized protein YbeL	ybeL	sp|P0AAT9|YBEL_ECOLI Uncharacterized protein YbeL OS=Escherichia coli (strain K12) OX=83333 GN=ybeL PE=4 SV=1	1	4	4	4	2	2	2	3	2	3	2	2	2	3	2	3	2	2	2	3	2	3	25	25	25	18.797	160	160	0	13.374	By MS/MS	By MS/MS	By matching	By MS/MS	By MS/MS	By MS/MS	10.6	11.2	10.6	18.8	11.2	19.4
P0AAX8;P39176	P0AAX8	8;1	8;1	8;1	Probable L,D-transpeptidase YbiS	ybiS	sp|P0AAX8|YBIS_ECOLI Probable L,D-transpeptidase YbiS OS=Escherichia coli (strain K12) OX=83333 GN=ybiS PE=1 SV=1	2	8	8	8	4	4	5	5	6	7	4	4	5	5	6	7	4	4	5	5	6	7	45.1	45.1	45.1	33.325	306	306;310	0	73.736	By MS/MS	By MS/MS	By MS/MS	By MS/MS	By MS/MS	By MS/MS	14.4	20.9	19.9	23.2	38.9	35.6
P0AAY6	P0AAY6	1	1	1	Uncharacterized protein YbjN	ybjN	sp|P0AAY6|YBJN_ECOLI Uncharacterized protein YbjN OS=Escherichia coli (strain K12) OX=83333 GN=ybjN PE=1 SV=1	1	1	1	1	1	0	0	1	0	1	1	0	0	1	0	1	1	0	0	1	0	1	7.6	7.6	7.6	17.666	158	158	0.0054237	2.9442	By matching			By MS/MS		By MS/MS	7.6	0	0	7.6	0	7.6
P0AAZ7	P0AAZ7	2	2	2	UPF0434 protein YcaR	ycaR	sp|P0AAZ7|YCAR_ECOLI UPF0434 protein YcaR OS=Escherichia coli (strain K12) OX=83333 GN=ycaR PE=1 SV=1	1	2	2	2	2	2	0	2	2	2	2	2	0	2	2	2	2	2	0	2	2	2	35	35	35	6.8549	60	60	0	5.4802	By MS/MS	By MS/MS		By MS/MS	By MS/MS	By MS/MS	35	35	0	35	35	35
P0AB03	P0AB03	1	1	1	Uncharacterized protein YcbJ	ycbJ	sp|P0AB03|YCBJ_ECOLI Uncharacterized protein YcbJ OS=Escherichia coli (strain K12) OX=83333 GN=ycbJ PE=4 SV=1	1	1	1	1	0	0	0	1	0	0	0	0	0	1	0	0	0	0	0	1	0	0	3.4	3.4	3.4	34.487	297	297	0.0027816	3.2445				By MS/MS			0	0	0	3.4	0	0
P0AB12	P0AB12	3	3	3	Inner membrane protein YccF	yccF	sp|P0AB12|YCCF_ECOLI Inner membrane protein YccF OS=Escherichia coli (strain K12) OX=83333 GN=yccF PE=1 SV=1	1	3	3	3	2	2	1	3	3	1	2	2	1	3	3	1	2	2	1	3	3	1	29.1	29.1	29.1	16.275	148	148	0	14.16	By MS/MS	By MS/MS	By matching	By MS/MS	By MS/MS	By MS/MS	14.9	14.9	14.2	29.1	29.1	7.4
P0AB26	P0AB26	2	2	2	Uncharacterized lipoprotein YceB	yceB	sp|P0AB26|YCEB_ECOLI Uncharacterized lipoprotein YceB OS=Escherichia coli (strain K12) OX=83333 GN=yceB PE=1 SV=1	1	2	2	2	0	2	1	1	2	2	0	2	1	1	2	2	0	2	1	1	2	2	14.5	14.5	14.5	20.5	186	186	0	6.2206		By matching	By matching	By matching	By MS/MS	By MS/MS	0	14.5	8.1	8.1	14.5	14.5
P0AB28	P0AB28	7	7	7	Uncharacterized protein YceD	yceD	sp|P0AB28|YCED_ECOLI Large ribosomal RNA subunit accumulation protein YceD OS=Escherichia coli (strain K12) OX=83333 GN=yceD PE=2 SV=1	1	7	7	7	5	4	4	5	7	4	5	4	4	5	7	4	5	4	4	5	7	4	34.7	34.7	34.7	19.315	173	173	0	82.724	By MS/MS	By MS/MS	By MS/MS	By MS/MS	By MS/MS	By MS/MS	24.9	19.1	23.7	20.2	34.7	23.7
P0AB38	P0AB38	2	2	2	Penicillin-binding protein activator LpoB	lpoB	sp|P0AB38|LPOB_ECOLI Penicillin-binding protein activator LpoB OS=Escherichia coli (strain K12) OX=83333 GN=lpoB PE=1 SV=1	1	2	2	2	2	1	2	1	2	2	2	1	2	1	2	2	2	1	2	1	2	2	13.6	13.6	13.6	22.515	213	213	0	7.6743	By MS/MS	By matching	By matching	By MS/MS	By MS/MS	By MS/MS	13.6	7	13.6	6.6	13.6	13.6
P0AB43	P0AB43	3	3	3	Protein YcgL	ycgL	sp|P0AB43|YCGL_ECOLI Protein YcgL OS=Escherichia coli (strain K12) OX=83333 GN=ycgL PE=1 SV=3	1	3	3	3	2	1	2	3	2	2	2	1	2	3	2	2	2	1	2	3	2	2	36.1	36.1	36.1	12.414	108	108	0	8.7321	By MS/MS	By matching	By matching	By MS/MS	By MS/MS	By MS/MS	16.7	7.4	26.9	36.1	26.9	26.9
P0AB52	P0AB52	1	1	1	Protein YchN	ychN	sp|P0AB52|YCHN_ECOLI Protein YchN OS=Escherichia coli (strain K12) OX=83333 GN=ychN PE=1 SV=1	1	1	1	1	1	0	1	1	0	0	1	0	1	1	0	0	1	0	1	1	0	0	7.7	7.7	7.7	12.693	117	117	0.0066313	2.5987	By MS/MS		By matching	By MS/MS			7.7	0	7.7	7.7	0	0
P0AB67	P0AB67	5	5	5	NAD(P) transhydrogenase subunit beta	pntB	sp|P0AB67|PNTB_ECOLI NAD(P) transhydrogenase subunit beta OS=Escherichia coli (strain K12) OX=83333 GN=pntB PE=1 SV=1	1	5	5	5	2	3	1	2	4	2	2	3	1	2	4	2	2	3	1	2	4	2	16.7	16.7	16.7	48.722	462	462	0	23.19	By MS/MS	By MS/MS	By matching	By MS/MS	By MS/MS	By MS/MS	5.4	11.3	2.6	5.4	14.9	5.4
P0AB71	P0AB71	14	14	14	Fructose-bisphosphate aldolase class 2	fbaA	sp|P0AB71|ALF_ECOLI Fructose-bisphosphate aldolase class 2 OS=Escherichia coli (strain K12) OX=83333 GN=fbaA PE=1 SV=2	1	14	14	14	11	13	10	12	13	12	11	13	10	12	13	12	11	13	10	12	13	12	53.2	53.2	53.2	39.147	359	359	0	323.31	By MS/MS	By MS/MS	By MS/MS	By MS/MS	By MS/MS	By MS/MS	42.9	49	36.2	47.1	52.6	46
P0AB77	P0AB77	16	16	16	2-amino-3-ketobutyrate coenzyme A ligase	kbl	sp|P0AB77|KBL_ECOLI 2-amino-3-ketobutyrate coenzyme A ligase OS=Escherichia coli (strain K12) OX=83333 GN=kbl PE=1 SV=1	1	16	16	16	6	7	6	14	13	13	6	7	6	14	13	13	6	7	6	14	13	13	55	55	55	43.117	398	398	0	105.09	By MS/MS	By MS/MS	By MS/MS	By MS/MS	By MS/MS	By MS/MS	17.1	23.9	17.1	49.7	41.7	48
P0AB80	P0AB80	6	6	6	Branched-chain-amino-acid aminotransferase	ilvE	sp|P0AB80|ILVE_ECOLI Branched-chain-amino-acid aminotransferase OS=Escherichia coli (strain K12) OX=83333 GN=ilvE PE=1 SV=2	1	6	6	6	1	1	2	3	4	2	1	1	2	3	4	2	1	1	2	3	4	2	24.6	24.6	24.6	34.093	309	309	0	13.625	By matching	By MS/MS	By MS/MS	By MS/MS	By MS/MS	By MS/MS	3.6	6.1	7.1	11	17.2	9.7
P0AB89	P0AB89	15	15	15	Adenylosuccinate lyase	purB	sp|P0AB89|PUR8_ECOLI Adenylosuccinate lyase OS=Escherichia coli (strain K12) OX=83333 GN=purB PE=1 SV=1	1	15	15	15	9	8	3	12	14	13	9	8	3	12	14	13	9	8	3	12	14	13	37.9	37.9	37.9	51.542	456	456	0	167.96	By MS/MS	By MS/MS	By MS/MS	By MS/MS	By MS/MS	By MS/MS	22.1	18.2	5.7	32.7	35.7	33.6
P0AB91	P0AB91	5	4	4	Phospho-2-dehydro-3-deoxyheptonate aldolase, Phe-sensitive	aroG	sp|P0AB91|AROG_ECOLI Phospho-2-dehydro-3-deoxyheptonate aldolase, Phe-sensitive OS=Escherichia coli (strain K12) OX=83333 GN=aroG PE=1 SV=1	1	5	4	4	1	0	1	1	3	3	1	0	1	1	2	2	1	0	1	1	2	2	18	16	16	38.009	350	350	0	17.732	By matching		By matching	By MS/MS	By MS/MS	By MS/MS	4.3	0	3.1	4.3	10.6	8.9
P0AB98	P0AB98	1	1	1	ATP synthase subunit a	atpB	sp|P0AB98|ATP6_ECOLI ATP synthase subunit a OS=Escherichia coli (strain K12) OX=83333 GN=atpB PE=1 SV=1	1	1	1	1	1	1	1	1	1	1	1	1	1	1	1	1	1	1	1	1	1	1	8.5	8.5	8.5	30.303	271	271	0	4.8597	By MS/MS	By MS/MS	By matching	By MS/MS	By matching	By MS/MS	8.5	8.5	8.5	8.5	8.5	8.5
P0ABA0	P0ABA0	7	7	7	ATP synthase subunit b	atpF	sp|P0ABA0|ATPF_ECOLI ATP synthase subunit b OS=Escherichia coli (strain K12) OX=83333 GN=atpF PE=1 SV=1	1	7	7	7	6	6	6	6	6	6	6	6	6	6	6	6	6	6	6	6	6	6	51.9	51.9	51.9	17.264	156	156	0	61.697	By MS/MS	By MS/MS	By MS/MS	By MS/MS	By MS/MS	By MS/MS	44.2	44.2	44.2	44.2	46.8	44.2
P0ABA4	P0ABA4	6	6	6	ATP synthase subunit delta	atpH	sp|P0ABA4|ATPD_ECOLI ATP synthase subunit delta OS=Escherichia coli (strain K12) OX=83333 GN=atpH PE=1 SV=1	1	6	6	6	1	1	5	5	6	5	1	1	5	5	6	5	1	1	5	5	6	5	48.6	48.6	48.6	19.332	177	177	0	88.787	By matching	By MS/MS	By matching	By MS/MS	By MS/MS	By MS/MS	7.3	13.6	43.5	42.4	48.6	42.4
P0ABA6	P0ABA6	16	16	16	ATP synthase gamma chain	atpG	sp|P0ABA6|ATPG_ECOLI ATP synthase gamma chain OS=Escherichia coli (strain K12) OX=83333 GN=atpG PE=1 SV=1	1	16	16	16	13	14	12	15	14	12	13	14	12	15	14	12	13	14	12	15	14	12	60.3	60.3	60.3	31.577	287	287	0	247.06	By MS/MS	By MS/MS	By MS/MS	By MS/MS	By MS/MS	By MS/MS	48.8	54.7	45.6	57.5	52.6	46.7
P0ABB0	P0ABB0	26	26	26	ATP synthase subunit alpha	atpA	sp|P0ABB0|ATPA_ECOLI ATP synthase subunit alpha OS=Escherichia coli (strain K12) OX=83333 GN=atpA PE=1 SV=1	1	26	26	26	21	22	22	24	26	22	21	22	22	24	26	22	21	22	22	24	26	22	63.4	63.4	63.4	55.221	513	513	0	323.31	By MS/MS	By MS/MS	By MS/MS	By MS/MS	By MS/MS	By MS/MS	53	55.4	55.2	60.8	63.4	56.9
P0ABB4	P0ABB4	25	25	25	ATP synthase subunit beta	atpD	sp|P0ABB4|ATPB_ECOLI ATP synthase subunit beta OS=Escherichia coli (strain K12) OX=83333 GN=atpD PE=1 SV=2	1	25	25	25	20	22	19	23	25	24	20	22	19	23	25	24	20	22	19	23	25	24	77	77	77	50.325	460	460	0	323.31	By MS/MS	By MS/MS	By MS/MS	By MS/MS	By MS/MS	By MS/MS	65.4	68.3	61.5	73	77	76.5
P0ABB8	P0ABB8	18	18	18	Magnesium-transporting ATPase, P-type 1	mgtA	sp|P0ABB8|ATMA_ECOLI Magnesium-transporting ATPase, P-type 1 OS=Escherichia coli (strain K12) OX=83333 GN=mgtA PE=1 SV=1	1	18	18	18	1	8	6	11	12	12	1	8	6	11	12	12	1	8	6	11	12	12	30.2	30.2	30.2	99.465	898	898	0	172.37	By matching	By MS/MS	By MS/MS	By MS/MS	By MS/MS	By MS/MS	0.9	12.5	10.2	20.5	21.4	21.6
P0ABC3	P0ABC3	10	10	10	Modulator of FtsH protease HflC	hflC	sp|P0ABC3|HFLC_ECOLI Modulator of FtsH protease HflC OS=Escherichia coli (strain K12) OX=83333 GN=hflC PE=1 SV=1	1	10	10	10	3	5	3	4	8	8	3	5	3	4	8	8	3	5	3	4	8	8	39.2	39.2	39.2	37.649	334	334	0	38.087	By MS/MS	By MS/MS	By MS/MS	By MS/MS	By MS/MS	By MS/MS	12.9	19.8	8.1	18.6	31.1	27.8
P0ABC7	P0ABC7	13	13	13	Modulator of FtsH protease HflK	hflK	sp|P0ABC7|HFLK_ECOLI Modulator of FtsH protease HflK OS=Escherichia coli (strain K12) OX=83333 GN=hflK PE=1 SV=1	1	13	13	13	5	5	6	11	11	11	5	5	6	11	11	11	5	5	6	11	11	11	37.5	37.5	37.5	45.544	419	419	0	142.92	By MS/MS	By MS/MS	By MS/MS	By MS/MS	By MS/MS	By MS/MS	14.3	13.4	16.7	30.3	35.6	30.3
P0ABD5	P0ABD5	15	15	15	Acetyl-coenzyme A carboxylase carboxyl transferase subunit alpha	accA	sp|P0ABD5|ACCA_ECOLI Acetyl-coenzyme A carboxylase carboxyl transferase subunit alpha OS=Escherichia coli (strain K12) OX=83333 GN=accA PE=1 SV=2	1	15	15	15	7	7	6	11	13	12	7	7	6	11	13	12	7	7	6	11	13	12	61.8	61.8	61.8	35.241	319	319	0	289.66	By MS/MS	By MS/MS	By MS/MS	By MS/MS	By MS/MS	By MS/MS	34.5	35.4	26.3	53	55.8	56.1
P0ABD8	P0ABD8	7	7	7	Biotin carboxyl carrier protein of acetyl-CoA carboxylase	accB	sp|P0ABD8|BCCP_ECOLI Biotin carboxyl carrier protein of acetyl-CoA carboxylase OS=Escherichia coli (strain K12) OX=83333 GN=accB PE=1 SV=1	1	7	7	7	7	6	6	6	6	5	7	6	6	6	6	5	7	6	6	6	6	5	46.8	46.8	46.8	16.687	156	156	0	323.31	By MS/MS	By MS/MS	By MS/MS	By MS/MS	By MS/MS	By MS/MS	46.8	43.6	43.6	43.6	43.6	39.1
P0ABE2	P0ABE2	2	2	2	Protein BolA	bolA	sp|P0ABE2|BOLA_ECOLI DNA-binding transcriptional regulator BolA OS=Escherichia coli (strain K12) OX=83333 GN=bolA PE=1 SV=1	1	2	2	2	2	1	1	1	1	1	2	1	1	1	1	1	2	1	1	1	1	1	26.7	26.7	26.7	11.994	105	105	0	7.3759	By MS/MS	By MS/MS	By MS/MS	By MS/MS	By MS/MS	By MS/MS	26.7	15.2	15.2	11.4	15.2	15.2
P0ABF1	P0ABF1	15	15	15	Poly(A) polymerase I	pcnB	sp|P0ABF1|PCNB_ECOLI Poly(A) polymerase I OS=Escherichia coli (strain K12) OX=83333 GN=pcnB PE=1 SV=2	1	15	15	15	4	3	4	12	12	13	4	3	4	12	12	13	4	3	4	12	12	13	32.7	32.7	32.7	53.87	465	465	0	53.009	By MS/MS	By MS/MS	By matching	By MS/MS	By MS/MS	By MS/MS	11.6	9	9.5	28	25.2	29.7
P0ABF6	P0ABF6	11	11	11	Cytidine deaminase	cdd	sp|P0ABF6|CDD_ECOLI Cytidine deaminase OS=Escherichia coli (strain K12) OX=83333 GN=cdd PE=1 SV=1	1	11	11	11	10	7	7	9	9	9	10	7	7	9	9	9	10	7	7	9	9	9	62.9	62.9	62.9	31.54	294	294	0	241.39	By MS/MS	By MS/MS	By MS/MS	By MS/MS	By MS/MS	By MS/MS	55.1	37.8	41.5	45.2	56.5	50.3
P0ABF8	P0ABF8	2	2	2	CDP-diacylglycerol--glycerol-3-phosphate 3-phosphatidyltransferase	pgsA	sp|P0ABF8|PGSA_ECOLI CDP-diacylglycerol--glycerol-3-phosphate 3-phosphatidyltransferase OS=Escherichia coli (strain K12) OX=83333 GN=pgsA PE=1 SV=2	1	2	2	2	1	0	1	2	0	1	1	0	1	2	0	1	1	0	1	2	0	1	10.4	10.4	10.4	20.7	182	182	0.0021067	3.4303	By MS/MS		By matching	By MS/MS		By MS/MS	6	0	6	10.4	0	6
P0ABG1	P0ABG1	1	1	1	Phosphatidate cytidylyltransferase	cdsA	sp|P0ABG1|CDSA_ECOLI Phosphatidate cytidylyltransferase OS=Escherichia coli (strain K12) OX=83333 GN=cdsA PE=1 SV=2	1	1	1	1	0	0	0	1	1	1	0	0	0	1	1	1	0	0	0	1	1	1	5.3	5.3	5.3	31.453	285	285	0	8.8207				By MS/MS	By MS/MS	By MS/MS	0	0	0	5.3	5.3	5.3
P0ABG4	P0ABG4	2	2	2	Lipid II flippase FtsW	ftsW	sp|P0ABG4|FTSW_ECOLI Probable peptidoglycan glycosyltransferase FtsW OS=Escherichia coli (strain K12) OX=83333 GN=ftsW PE=1 SV=1	1	2	2	2	0	0	0	0	2	0	0	0	0	0	2	0	0	0	0	0	2	0	5.3	5.3	5.3	45.987	414	414	0.0021082	3.4358					By MS/MS		0	0	0	0	5.3	0
P0ABH0	P0ABH0	9	9	9	Cell division protein FtsA	ftsA	sp|P0ABH0|FTSA_ECOLI Cell division protein FtsA OS=Escherichia coli (strain K12) OX=83333 GN=ftsA PE=1 SV=1	1	9	9	9	1	2	1	8	9	9	1	2	1	8	9	9	1	2	1	8	9	9	36.7	36.7	36.7	45.329	420	420	0	127.71	By matching	By MS/MS	By matching	By MS/MS	By MS/MS	By MS/MS	2.4	4.8	2.6	34.5	36.7	36.7
P0ABH7	P0ABH7	23	23	23	Citrate synthase	gltA	sp|P0ABH7|CISY_ECOLI Citrate synthase OS=Escherichia coli (strain K12) OX=83333 GN=gltA PE=1 SV=1	1	23	23	23	15	13	14	22	23	22	15	13	14	22	23	22	15	13	14	22	23	22	72.8	72.8	72.8	48.014	427	427	0	323.31	By MS/MS	By MS/MS	By MS/MS	By MS/MS	By MS/MS	By MS/MS	41.5	34.9	37.2	72.6	72.8	72.6
P0ABH9	P0ABH9	30	30	30	ATP-dependent Clp protease ATP-binding subunit ClpA	clpA	sp|P0ABH9|CLPA_ECOLI ATP-dependent Clp protease ATP-binding subunit ClpA OS=Escherichia coli (strain K12) OX=83333 GN=clpA PE=1 SV=1	1	30	30	30	13	14	10	25	26	24	13	14	10	25	26	24	13	14	10	25	26	24	49.9	49.9	49.9	84.206	758	758	0	323.31	By MS/MS	By MS/MS	By MS/MS	By MS/MS	By MS/MS	By MS/MS	18.9	23.6	15.3	43.1	46.2	41.7
P0ABI4	P0ABI4	4	4	4	Magnesium transport protein CorA	corA	sp|P0ABI4|CORA_ECOLI Magnesium transport protein CorA OS=Escherichia coli (strain K12) OX=83333 GN=corA PE=1 SV=1	1	4	4	4	1	2	1	2	4	3	1	2	1	2	4	3	1	2	1	2	4	3	19	19	19	36.589	316	316	0	35.688	By matching	By MS/MS	By matching	By MS/MS	By MS/MS	By MS/MS	2.2	10.4	3.2	9.5	19	11.7
P0ABI8	P0ABI8	8	8	8	Cytochrome bo(3) ubiquinol oxidase subunit 1	cyoB	sp|P0ABI8|CYOB_ECOLI Cytochrome bo(3) ubiquinol oxidase subunit 1 OS=Escherichia coli (strain K12) OX=83333 GN=cyoB PE=1 SV=1	1	8	8	8	2	4	5	5	7	5	2	4	5	5	7	5	2	4	5	5	7	5	14.8	14.8	14.8	74.367	663	663	0	60.096	By MS/MS	By MS/MS	By MS/MS	By MS/MS	By MS/MS	By MS/MS	3	7.7	10.7	8.3	13.6	8.3
P0ABJ1	P0ABJ1	7	7	7	Cytochrome bo(3) ubiquinol oxidase subunit 2	cyoA	sp|P0ABJ1|CYOA_ECOLI Cytochrome bo(3) ubiquinol oxidase subunit 2 OS=Escherichia coli (strain K12) OX=83333 GN=cyoA PE=1 SV=1	1	7	7	7	4	5	7	5	7	6	4	5	7	5	7	6	4	5	7	5	7	6	34.6	34.6	34.6	34.911	315	315	0	78.155	By MS/MS	By MS/MS	By MS/MS	By MS/MS	By MS/MS	By MS/MS	20	28.6	34.6	22.9	34.6	26
P0ABJ9	P0ABJ9	9	9	9	Cytochrome bd-I ubiquinol oxidase subunit 1	cydA	sp|P0ABJ9|CYDA_ECOLI Cytochrome bd-I ubiquinol oxidase subunit 1 OS=Escherichia coli (strain K12) OX=83333 GN=cydA PE=1 SV=1	1	9	9	9	7	7	7	6	6	9	7	7	7	6	6	9	7	7	7	6	6	9	24.3	24.3	24.3	58.204	522	522	0	57.142	By MS/MS	By MS/MS	By MS/MS	By MS/MS	By MS/MS	By MS/MS	16.7	20.9	16.7	14	13.2	24.3
P0ABK2	P0ABK2	2	2	2	Cytochrome bd-I ubiquinol oxidase subunit 2	cydB	sp|P0ABK2|CYDB_ECOLI Cytochrome bd-I ubiquinol oxidase subunit 2 OS=Escherichia coli (strain K12) OX=83333 GN=cydB PE=1 SV=1	1	2	2	2	2	1	1	2	1	2	2	1	1	2	1	2	2	1	1	2	1	2	5.8	5.8	5.8	42.453	379	379	0	9.195	By MS/MS	By MS/MS	By MS/MS	By MS/MS	By MS/MS	By MS/MS	5.8	3.7	3.7	5.8	3.7	5.8
P0ABK5	P0ABK5	15	15	15	Cysteine synthase A	cysK	sp|P0ABK5|CYSK_ECOLI Cysteine synthase A OS=Escherichia coli (strain K12) OX=83333 GN=cysK PE=1 SV=2	1	15	15	15	10	9	10	13	14	13	10	9	10	13	14	13	10	9	10	13	14	13	70.9	70.9	70.9	34.489	323	323	0	303.32	By MS/MS	By MS/MS	By MS/MS	By MS/MS	By MS/MS	By MS/MS	50.5	47.4	50.5	66.3	66.9	66.3
P0ABK9	P0ABK9	4	4	4	Cytochrome c-552	nrfA	sp|P0ABK9|NRFA_ECOLI Cytochrome c-552 OS=Escherichia coli (strain K12) OX=83333 GN=nrfA PE=1 SV=1	1	4	4	4	2	2	2	4	3	3	2	2	2	4	3	3	2	2	2	4	3	3	11.1	11.1	11.1	53.702	478	478	0	17.819	By MS/MS	By MS/MS	By MS/MS	By MS/MS	By MS/MS	By MS/MS	4.6	6.5	4.6	11.1	6.9	8.8
P0ABN5	P0ABN5	4	4	4	Anaerobic C4-dicarboxylate transporter DcuA	dcuA	sp|P0ABN5|DCUA_ECOLI Anaerobic C4-dicarboxylate transporter DcuA OS=Escherichia coli (strain K12) OX=83333 GN=dcuA PE=1 SV=1	1	4	4	4	0	0	0	2	1	3	0	0	0	2	1	3	0	0	0	2	1	3	7.2	7.2	7.2	45.75	433	433	0	7.9141				By MS/MS	By matching	By MS/MS	0	0	0	4.2	2.1	6.9
P0ABP3	P0ABP3	2	2	2	Anaerobic C4-dicarboxylate transporter DcuC	dcuC	sp|P0ABP3|DCUC_ECOLI Anaerobic C4-dicarboxylate transporter DcuC OS=Escherichia coli (strain K12) OX=83333 GN=dcuC PE=3 SV=1	1	2	2	2	2	1	1	2	2	1	2	1	1	2	2	1	2	1	1	2	2	1	3.9	3.9	3.9	48.412	461	461	0	5.7137	By matching	By MS/MS	By MS/MS	By MS/MS	By MS/MS	By MS/MS	3.9	2.2	2.2	3.9	3.9	2.2
P0ABP8	P0ABP8	15	15	15	Purine nucleoside phosphorylase DeoD-type	deoD	sp|P0ABP8|DEOD_ECOLI Purine nucleoside phosphorylase DeoD-type OS=Escherichia coli (strain K12) OX=83333 GN=deoD PE=1 SV=2	1	15	15	15	9	9	10	14	15	15	9	9	10	14	15	15	9	9	10	14	15	15	80.3	80.3	80.3	25.95	239	239	0	323.31	By MS/MS	By MS/MS	By MS/MS	By MS/MS	By MS/MS	By MS/MS	43.5	37.2	47.3	70.7	80.3	80.3
P0ABQ0	P0ABQ0	11	11	11	Coenzyme A biosynthesis bifunctional protein CoaBC;Phosphopantothenoylcysteine decarboxylase;Phosphopantothenate--cysteine ligase	coaBC	sp|P0ABQ0|COABC_ECOLI Coenzyme A biosynthesis bifunctional protein CoaBC OS=Escherichia coli (strain K12) OX=83333 GN=coaBC PE=1 SV=2	1	11	11	11	4	4	3	9	11	9	4	4	3	9	11	9	4	4	3	9	11	9	52.5	52.5	52.5	43.438	406	406	0	275.91	By MS/MS	By MS/MS	By MS/MS	By MS/MS	By MS/MS	By MS/MS	14	14.5	11.8	45.8	52.5	45.8
P0ABQ2	P0ABQ2	14	14	14	2-hydroxy-3-oxopropionate reductase	garR	sp|P0ABQ2|GARR_ECOLI 2-hydroxy-3-oxopropionate reductase OS=Escherichia coli (strain K12) OX=83333 GN=garR PE=1 SV=1	1	14	14	14	2	4	3	11	12	8	2	4	3	11	12	8	2	4	3	11	12	8	75.2	75.2	75.2	30.427	294	294	0	136.39	By MS/MS	By MS/MS	By MS/MS	By MS/MS	By MS/MS	By MS/MS	8.2	21.1	13.6	56.8	65	40.1
P0ABQ4	P0ABQ4	5	5	5	Dihydrofolate reductase	folA	sp|P0ABQ4|DYR_ECOLI Dihydrofolate reductase OS=Escherichia coli (strain K12) OX=83333 GN=folA PE=1 SV=1	1	5	5	5	4	2	1	4	3	3	4	2	1	4	3	3	4	2	1	4	3	3	45.3	45.3	45.3	17.999	159	159	0	18.895	By MS/MS	By matching	By MS/MS	By MS/MS	By MS/MS	By MS/MS	31.4	13.2	8.2	31.4	27	18.2
P0ABS1	P0ABS1	4	4	4	RNA polymerase-binding transcription factor DksA	dksA	sp|P0ABS1|DKSA_ECOLI RNA polymerase-binding transcription factor DksA OS=Escherichia coli (strain K12) OX=83333 GN=dksA PE=1 SV=1	1	4	4	4	4	2	1	4	4	4	4	2	1	4	4	4	4	2	1	4	4	4	48.3	48.3	48.3	17.528	151	151	0	55.423	By MS/MS	By MS/MS	By MS/MS	By MS/MS	By MS/MS	By MS/MS	48.3	19.9	7.9	48.3	48.3	48.3
P0ABS5	P0ABS5	3	3	3	DNA primase	dnaG	sp|P0ABS5|DNAG_ECOLI DNA primase OS=Escherichia coli (strain K12) OX=83333 GN=dnaG PE=1 SV=1	1	3	3	3	1	0	0	0	2	1	1	0	0	0	2	1	1	0	0	0	2	1	6.5	6.5	6.5	65.564	581	581	0	5.0801	By MS/MS				By MS/MS	By MS/MS	2.8	0	0	0	3.8	1.7
P0ABT2	P0ABT2	9	9	9	DNA protection during starvation protein	dps	sp|P0ABT2|DPS_ECOLI DNA protection during starvation protein OS=Escherichia coli (strain K12) OX=83333 GN=dps PE=1 SV=2	1	9	9	9	9	9	9	9	9	9	9	9	9	9	9	9	9	9	9	9	9	9	66.5	66.5	66.5	18.695	167	167	0	127.28	By MS/MS	By MS/MS	By MS/MS	By MS/MS	By MS/MS	By MS/MS	66.5	66.5	66.5	66.5	66.5	66.5
P0ABU0	P0ABU0	7	7	7	1,4-dihydroxy-2-naphthoyl-CoA synthase	menB	sp|P0ABU0|MENB_ECOLI 1,4-dihydroxy-2-naphthoyl-CoA synthase OS=Escherichia coli (strain K12) OX=83333 GN=menB PE=1 SV=1	1	7	7	7	1	2	2	6	7	3	1	2	2	6	7	3	1	2	2	6	7	3	34.4	34.4	34.4	31.633	285	285	0	122.68	By MS/MS	By MS/MS	By MS/MS	By MS/MS	By MS/MS	By MS/MS	5.6	10.2	12.3	31.2	34.4	15.8
P0ABU2	P0ABU2	18	18	18	Ribosome-binding ATPase YchF	ychF	sp|P0ABU2|YCHF_ECOLI Ribosome-binding ATPase YchF OS=Escherichia coli (strain K12) OX=83333 GN=ychF PE=1 SV=2	1	18	18	18	12	6	10	17	15	14	12	6	10	17	15	14	12	6	10	17	15	14	69.4	69.4	69.4	39.667	363	363	0	244.36	By MS/MS	By MS/MS	By MS/MS	By MS/MS	By MS/MS	By MS/MS	37.7	20.7	34.4	67.5	61.7	59
P0ABU5	P0ABU5	10	10	10	Enhancing lycopene biosynthesis protein 2	elbB	sp|P0ABU5|ELBB_ECOLI Glyoxalase ElbB OS=Escherichia coli (strain K12) OX=83333 GN=elbB PE=1 SV=1	1	10	10	10	10	9	9	9	9	9	10	9	9	9	9	9	10	9	9	9	9	9	71.9	71.9	71.9	22.981	217	217	0	323.31	By MS/MS	By MS/MS	By MS/MS	By MS/MS	By MS/MS	By MS/MS	71.9	66.4	55.8	66.4	68.2	66.4
P0ABU7	P0ABU7	5	5	5	Biopolymer transport protein ExbB	exbB	sp|P0ABU7|EXBB_ECOLI Biopolymer transport protein ExbB OS=Escherichia coli (strain K12) OX=83333 GN=exbB PE=1 SV=1	1	5	5	5	4	3	2	5	5	3	4	3	2	5	5	3	4	3	2	5	5	3	25.4	25.4	25.4	26.287	244	244	0	60.409	By MS/MS	By MS/MS	By MS/MS	By MS/MS	By MS/MS	By MS/MS	18.9	15.6	11.9	25.4	25.4	16.4
P0ABU9	P0ABU9	3	3	3	Protein TolQ	tolQ	sp|P0ABU9|TOLQ_ECOLI Tol-Pal system protein TolQ OS=Escherichia coli (strain K12) OX=83333 GN=tolQ PE=1 SV=1	1	3	3	3	2	0	1	3	3	2	2	0	1	3	3	2	2	0	1	3	3	2	17	17	17	25.597	230	230	0	15.915	By MS/MS		By matching	By MS/MS	By MS/MS	By MS/MS	13	0	6.5	17	17	10.4
P0ABV2	P0ABV2	3	3	3	Biopolymer transport protein ExbD	exbD	sp|P0ABV2|EXBD_ECOLI Biopolymer transport protein ExbD OS=Escherichia coli (strain K12) OX=83333 GN=exbD PE=1 SV=1	1	3	3	3	2	1	1	2	2	2	2	1	1	2	2	2	2	1	1	2	2	2	21.3	21.3	21.3	15.527	141	141	0	6.353	By MS/MS	By MS/MS	By matching	By MS/MS	By MS/MS	By MS/MS	12.1	7.1	7.1	14.2	12.1	12.1
P0ABZ1	P0ABZ1	2	2	2	Flagellar motor switch protein FliG	fliG	sp|P0ABZ1|FLIG_ECOLI Flagellar motor switch protein FliG OS=Escherichia coli (strain K12) OX=83333 GN=fliG PE=1 SV=1	1	2	2	2	0	0	0	2	1	2	0	0	0	2	1	2	0	0	0	2	1	2	7.6	7.6	7.6	36.776	331	331	0	6.8125				By MS/MS	By matching	By MS/MS	0	0	0	7.6	3.6	7.6
P0ABZ6	P0ABZ6	15	15	15	Chaperone SurA	surA	sp|P0ABZ6|SURA_ECOLI Chaperone SurA OS=Escherichia coli (strain K12) OX=83333 GN=surA PE=1 SV=1	1	15	15	15	8	4	7	12	13	13	8	4	7	12	13	13	8	4	7	12	13	13	52.1	52.1	52.1	47.283	428	428	0	323.31	By MS/MS	By MS/MS	By MS/MS	By MS/MS	By MS/MS	By MS/MS	25.7	11.7	20.1	35.5	41.6	42.1
P0AC02	P0AC02	9	9	9	Outer membrane protein assembly factor BamD	bamD	sp|P0AC02|BAMD_ECOLI Outer membrane protein assembly factor BamD OS=Escherichia coli (strain K12) OX=83333 GN=bamD PE=1 SV=1	1	9	9	9	5	3	4	6	7	6	5	3	4	6	7	6	5	3	4	6	7	6	42.9	42.9	42.9	27.829	245	245	0	27.482	By MS/MS	By MS/MS	By matching	By MS/MS	By MS/MS	By MS/MS	22.4	15.1	18.8	26.9	31.8	30.6
P0AC13	P0AC13	5	5	5	Dihydropteroate synthase	folP	sp|P0AC13|DHPS_ECOLI Dihydropteroate synthase OS=Escherichia coli (strain K12) OX=83333 GN=folP PE=1 SV=1	1	5	5	5	1	0	1	2	2	4	1	0	1	2	2	4	1	0	1	2	2	4	19.5	19.5	19.5	30.615	282	282	0	11.425	By matching		By matching	By MS/MS	By MS/MS	By MS/MS	3.9	0	3.9	7.8	7.4	16
P0AC19	P0AC19	4	4	4	D-erythro-7,8-dihydroneopterin triphosphate epimerase	folX	sp|P0AC19|FOLX_ECOLI Dihydroneopterin triphosphate 2-epimerase OS=Escherichia coli (strain K12) OX=83333 GN=folX PE=1 SV=2	1	4	4	4	3	1	4	3	4	3	3	1	4	3	4	3	3	1	4	3	4	3	33.3	33.3	33.3	14.082	120	120	0	53.158	By MS/MS	By MS/MS	By MS/MS	By MS/MS	By MS/MS	By MS/MS	26.7	10	33.3	26.7	33.3	26.7
P0AC23	P0AC23	3	3	3	Probable formate transporter 1	focA	sp|P0AC23|FOCA_ECOLI Probable formate transporter 1 OS=Escherichia coli (strain K12) OX=83333 GN=focA PE=1 SV=1	1	3	3	3	3	3	3	2	3	3	3	3	3	2	3	3	3	3	3	2	3	3	11.2	11.2	11.2	30.99	285	285	0	41.122	By MS/MS	By MS/MS	By MS/MS	By MS/MS	By MS/MS	By MS/MS	11.2	11.2	11.2	6	11.2	11.2
P0AC28	P0AC28	1	1	1	5-formyltetrahydrofolate cyclo-ligase	ygfA	sp|P0AC28|5FCL_ECOLI 5-formyltetrahydrofolate cyclo-ligase OS=Escherichia coli (strain K12) OX=83333 GN=ygfA PE=1 SV=1	1	1	1	1	0	0	0	1	1	1	0	0	0	1	1	1	0	0	0	1	1	1	9.9	9.9	9.9	21.105	182	182	0	6.2801				By MS/MS	By MS/MS	By MS/MS	0	0	0	9.9	9.9	9.9
P0AC30	P0AC30	4	4	4	Cell division protein FtsX	ftsX	sp|P0AC30|FTSX_ECOLI Cell division protein FtsX OS=Escherichia coli (strain K12) OX=83333 GN=ftsX PE=1 SV=1	1	4	4	4	1	3	0	1	3	2	1	3	0	1	3	2	1	3	0	1	3	2	11.9	11.9	11.9	38.543	352	352	0	14.193	By MS/MS	By MS/MS		By MS/MS	By MS/MS	By MS/MS	3.1	9.7	0	3.1	8.8	6
P0AC33	P0AC33	24	24	14	Fumarate hydratase class I, aerobic	fumA	sp|P0AC33|FUMA_ECOLI Fumarate hydratase class I, aerobic OS=Escherichia coli (strain K12) OX=83333 GN=fumA PE=1 SV=2	1	24	24	14	13	13	15	16	21	20	13	13	15	16	21	20	7	6	10	8	12	11	64.4	64.4	36.9	60.298	548	548	0	323.31	By MS/MS	By MS/MS	By MS/MS	By MS/MS	By MS/MS	By MS/MS	31.8	31.4	34.5	39.2	56.9	51.8
P0AC41	P0AC41	23	23	23	Succinate dehydrogenase flavoprotein subunit	sdhA	sp|P0AC41|SDHA_ECOLI Succinate dehydrogenase flavoprotein subunit OS=Escherichia coli (strain K12) OX=83333 GN=sdhA PE=1 SV=1	1	23	23	23	15	12	12	20	19	15	15	12	12	20	19	15	15	12	12	20	19	15	59.7	59.7	59.7	64.421	588	588	0	323.31	By MS/MS	By MS/MS	By MS/MS	By MS/MS	By MS/MS	By MS/MS	37.8	28.2	29.3	50	48.3	35.5
P0AC44	P0AC44	2	2	2	Succinate dehydrogenase hydrophobic membrane anchor subunit	sdhD	sp|P0AC44|DHSD_ECOLI Succinate dehydrogenase hydrophobic membrane anchor subunit OS=Escherichia coli (strain K12) OX=83333 GN=sdhD PE=1 SV=1	1	2	2	2	2	1	1	2	2	1	2	1	1	2	2	1	2	1	1	2	2	1	8.7	8.7	8.7	12.867	115	115	0.00071942	3.9093	By matching	By matching	By matching	By MS/MS	By MS/MS	By MS/MS	8.7	7.8	7.8	8.7	8.7	7.8
P0AC47	P0AC47	6	6	6	Fumarate reductase iron-sulfur subunit	frdB	sp|P0AC47|FRDB_ECOLI Fumarate reductase iron-sulfur subunit OS=Escherichia coli (strain K12) OX=83333 GN=frdB PE=1 SV=2	1	6	6	6	4	4	4	4	6	4	4	4	4	4	6	4	4	4	4	4	6	4	37.3	37.3	37.3	27.123	244	244	0	37.56	By MS/MS	By MS/MS	By MS/MS	By MS/MS	By MS/MS	By MS/MS	26.6	17.6	17.6	20.1	37.3	19.7
P0AC53	P0AC53	22	22	22	Glucose-6-phosphate 1-dehydrogenase;Extracellular death factor	zwf	sp|P0AC53|G6PD_ECOLI Glucose-6-phosphate 1-dehydrogenase OS=Escherichia coli (strain K12) OX=83333 GN=zwf PE=1 SV=1	1	22	22	22	13	13	13	14	18	17	13	13	13	14	18	17	13	13	13	14	18	17	51.9	51.9	51.9	55.704	491	491	0	174.05	By MS/MS	By MS/MS	By MS/MS	By MS/MS	By MS/MS	By MS/MS	28.7	28.9	27.9	31.2	43.8	36
P0AC59	P0AC59	3	3	3	Glutaredoxin-2	grxB	sp|P0AC59|GLRX2_ECOLI Glutaredoxin 2 OS=Escherichia coli (strain K12) OX=83333 GN=grxB PE=1 SV=1	1	3	3	3	2	1	0	3	1	2	2	1	0	3	1	2	2	1	0	3	1	2	17.7	17.7	17.7	24.35	215	215	0	5.3829	By MS/MS	By MS/MS		By MS/MS	By MS/MS	By MS/MS	14.4	3.3	0	17.7	3.3	12.1
P0AC62	P0AC62	3	3	3	Glutaredoxin-3	grxC	sp|P0AC62|GLRX3_ECOLI Glutaredoxin 3 OS=Escherichia coli (strain K12) OX=83333 GN=grxC PE=1 SV=2	1	3	3	3	2	2	0	2	2	1	2	2	0	2	2	1	2	2	0	2	2	1	37.3	37.3	37.3	9.1374	83	83	0	5.8754	By MS/MS	By MS/MS		By MS/MS	By MS/MS	By matching	19.3	27.7	0	19.3	19.3	9.6
P0AC69	P0AC69	4	4	4	Glutaredoxin-4	grxD	sp|P0AC69|GLRX4_ECOLI Glutaredoxin 4 OS=Escherichia coli (strain K12) OX=83333 GN=grxD PE=1 SV=1	1	4	4	4	3	4	3	3	3	4	3	4	3	3	3	4	3	4	3	3	3	4	46.1	46.1	46.1	12.879	115	115	0	48.884	By MS/MS	By MS/MS	By MS/MS	By MS/MS	By MS/MS	By MS/MS	28.7	46.1	28.7	28.7	28.7	46.1
P0AC75	P0AC75	2	2	2	3-deoxy-D-manno-octulosonic acid transferase	waaA	sp|P0AC75|KDTA_ECOLI 3-deoxy-D-manno-octulosonic acid transferase OS=Escherichia coli (strain K12) OX=83333 GN=waaA PE=1 SV=1	1	2	2	2	0	0	0	1	0	1	0	0	0	1	0	1	0	0	0	1	0	1	6.1	6.1	6.1	47.29	425	425	0	4.2161				By MS/MS		By MS/MS	0	0	0	2.8	0	3.3
P0AC78	P0AC78	2	2	2	Undecaprenyl-phosphate alpha-N-acetylglucosaminyl 1-phosphate transferase	wecA	sp|P0AC78|WECA_ECOLI Undecaprenyl-phosphate alpha-N-acetylglucosaminyl 1-phosphate transferase OS=Escherichia coli (strain K12) OX=83333 GN=wecA PE=1 SV=1	1	2	2	2	1	0	0	2	1	1	1	0	0	2	1	1	1	0	0	2	1	1	5.2	5.2	5.2	40.957	367	367	0	4.2606	By matching			By MS/MS	By MS/MS	By MS/MS	2.7	0	0	5.2	2.5	2.5
P0AC81	P0AC81	1	1	1	Lactoylglutathione lyase	gloA	sp|P0AC81|LGUL_ECOLI Lactoylglutathione lyase OS=Escherichia coli (strain K12) OX=83333 GN=gloA PE=1 SV=1	1	1	1	1	0	0	0	1	1	1	0	0	0	1	1	1	0	0	0	1	1	1	11.9	11.9	11.9	14.92	135	135	0	3.9744				By matching	By matching	By MS/MS	0	0	0	11.9	11.9	11.9
P0AC86	P0AC86	9	9	9	Glycogen phosphorylase	glgP	sp|P0AC86|PHSG_ECOLI Glycogen phosphorylase OS=Escherichia coli (strain K12) OX=83333 GN=glgP PE=3 SV=1	1	9	9	9	1	0	1	3	8	7	1	0	1	3	8	7	1	0	1	3	8	7	14.5	14.5	14.5	93.171	815	815	0	29.144	By matching		By matching	By MS/MS	By MS/MS	By MS/MS	2.3	0	2.3	4.7	12.1	11.7
P0ACA1	P0ACA1	1	1	1	Uncharacterized GST-like protein YibF	yibF	sp|P0ACA1|YIBF_ECOLI Uncharacterized GST-like protein YibF OS=Escherichia coli (strain K12) OX=83333 GN=yibF PE=1 SV=1	1	1	1	1	0	0	0	0	0	1	0	0	0	0	0	1	0	0	0	0	0	1	5.9	5.9	5.9	22.545	202	202	0.00071891	3.9038						By MS/MS	0	0	0	0	0	5.9
P0ACA3	P0ACA3	8	8	8	Stringent starvation protein A	sspA	sp|P0ACA3|SSPA_ECOLI Stringent starvation protein A OS=Escherichia coli (strain K12) OX=83333 GN=sspA PE=1 SV=2	1	8	8	8	5	4	7	7	8	7	5	4	7	7	8	7	5	4	7	7	8	7	54.7	54.7	54.7	24.305	212	212	0	120.34	By MS/MS	By MS/MS	By MS/MS	By MS/MS	By MS/MS	By MS/MS	30.2	26.9	48.1	44.3	54.7	48.1
P0ACA7	P0ACA7	1	1	1	Glutathione S-transferase GstB	gstB	sp|P0ACA7|GSTB_ECOLI Glutathione S-transferase GstB OS=Escherichia coli (strain K12) OX=83333 GN=gstB PE=1 SV=1	1	1	1	1	0	0	0	0	1	0	0	0	0	0	1	0	0	0	0	0	1	0	7.7	7.7	7.7	23.713	208	208	0	6.1045					By MS/MS		0	0	0	0	7.7	0
P0ACB0	P0ACB0	14	14	14	Replicative DNA helicase	dnaB	sp|P0ACB0|DNAB_ECOLI Replicative DNA helicase OS=Escherichia coli (strain K12) OX=83333 GN=dnaB PE=1 SV=1	1	14	14	14	1	3	0	9	11	10	1	3	0	9	11	10	1	3	0	9	11	10	38	38	38	52.389	471	471	0	122.78	By matching	By MS/MS		By MS/MS	By MS/MS	By MS/MS	1.7	7.9	0	27.6	31.8	25.9
P0ACB2	P0ACB2	11	11	11	Delta-aminolevulinic acid dehydratase	hemB	sp|P0ACB2|HEM2_ECOLI Delta-aminolevulinic acid dehydratase OS=Escherichia coli (strain K12) OX=83333 GN=hemB PE=1 SV=2	1	11	11	11	3	3	5	6	7	9	3	3	5	6	7	9	3	3	5	6	7	9	39.8	39.8	39.8	35.624	324	324	0	90.993	By MS/MS	By MS/MS	By MS/MS	By MS/MS	By MS/MS	By MS/MS	14.5	16.4	17.6	31.5	31.2	34.3
P0ACB4	P0ACB4	5	5	5	Protoporphyrinogen IX dehydrogenase [menaquinone]	hemG	sp|P0ACB4|HEMG_ECOLI Protoporphyrinogen IX dehydrogenase [quinone] OS=Escherichia coli (strain K12) OX=83333 GN=hemG PE=1 SV=1	1	5	5	5	3	2	2	4	1	2	3	2	2	4	1	2	3	2	2	4	1	2	31.5	31.5	31.5	21.226	181	181	0	19.104	By MS/MS	By MS/MS	By matching	By MS/MS	By matching	By MS/MS	19.3	14.4	14.4	23.2	6.1	14.4
P0ACB7	P0ACB7	5	5	5	Protein HemY	hemY	sp|P0ACB7|HEMY_ECOLI Protein HemY OS=Escherichia coli (strain K12) OX=83333 GN=hemY PE=1 SV=1	1	5	5	5	1	2	2	3	5	3	1	2	2	3	5	3	1	2	2	3	5	3	16.1	16.1	16.1	45.244	398	398	0	20.534	By MS/MS	By MS/MS	By matching	By MS/MS	By MS/MS	By MS/MS	2	7.5	6	11.6	16.1	11.6
P0ACC3	P0ACC3	3	3	3	Iron-sulfur cluster insertion protein ErpA	erpA	sp|P0ACC3|ERPA_ECOLI Iron-sulfur cluster insertion protein ErpA OS=Escherichia coli (strain K12) OX=83333 GN=erpA PE=1 SV=1	1	3	3	3	2	3	2	2	3	2	2	3	2	2	3	2	2	3	2	2	3	2	33.3	33.3	33.3	12.1	114	114	0	21.511	By MS/MS	By MS/MS	By MS/MS	By MS/MS	By MS/MS	By MS/MS	25.4	33.3	22.8	25.4	33.3	25.4
P0ACC7	P0ACC7	10	10	10	Bifunctional protein GlmU;UDP-N-acetylglucosamine pyrophosphorylase;Glucosamine-1-phosphate N-acetyltransferase	glmU	sp|P0ACC7|GLMU_ECOLI Bifunctional protein GlmU OS=Escherichia coli (strain K12) OX=83333 GN=glmU PE=1 SV=1	1	10	10	10	6	4	4	6	8	7	6	4	4	6	8	7	6	4	4	6	8	7	24.6	24.6	24.6	49.19	456	456	0	45.372	By MS/MS	By MS/MS	By MS/MS	By MS/MS	By MS/MS	By MS/MS	15.6	8.8	12.5	17.8	22.1	20.2
P0ACD4	P0ACD4	5	5	5	Iron-sulfur cluster assembly scaffold protein IscU	iscU	sp|P0ACD4|ISCU_ECOLI Iron-sulfur cluster assembly scaffold protein IscU OS=Escherichia coli (strain K12) OX=83333 GN=iscU PE=1 SV=1	1	5	5	5	4	3	4	4	5	4	4	3	4	4	5	4	4	3	4	4	5	4	48.4	48.4	48.4	13.848	128	128	0	32.913	By MS/MS	By MS/MS	By MS/MS	By MS/MS	By MS/MS	By MS/MS	33.6	26.6	33.6	33.6	48.4	33.6
P0ACE0	P0ACE0	15	15	15	Hydrogenase-2 large chain	hybC	sp|P0ACE0|MBHM_ECOLI Hydrogenase-2 large chain OS=Escherichia coli (strain K12) OX=83333 GN=hybC PE=1 SV=2	1	15	15	15	6	4	2	10	10	12	6	4	2	10	10	12	6	4	2	10	10	12	42.7	42.7	42.7	62.49	567	567	0	138.76	By MS/MS	By MS/MS	By MS/MS	By MS/MS	By MS/MS	By MS/MS	18.3	7.6	3	33.5	27.2	35.6
P0ACE7	P0ACE7	3	3	3	HIT-like protein HinT	hinT	sp|P0ACE7|HINT_ECOLI Purine nucleoside phosphoramidase OS=Escherichia coli (strain K12) OX=83333 GN=hinT PE=1 SV=1	1	3	3	3	3	2	3	3	3	2	3	2	3	3	3	2	3	2	3	3	3	2	31.1	31.1	31.1	13.241	119	119	0	22.104	By MS/MS	By MS/MS	By MS/MS	By MS/MS	By MS/MS	By MS/MS	31.1	20.2	31.1	31.1	31.1	25.2
P0ACF0	P0ACF0	4	4	4	DNA-binding protein HU-alpha	hupA	sp|P0ACF0|DBHA_ECOLI DNA-binding protein HU-alpha OS=Escherichia coli (strain K12) OX=83333 GN=hupA PE=1 SV=1	1	4	4	4	4	3	4	4	4	4	4	3	4	4	4	4	4	3	4	4	4	4	57.8	57.8	57.8	9.5349	90	90	0	93.842	By MS/MS	By MS/MS	By MS/MS	By MS/MS	By MS/MS	By MS/MS	57.8	43.3	57.8	57.8	57.8	57.8
P0ACF4	P0ACF4	4	4	4	DNA-binding protein HU-beta	hupB	sp|P0ACF4|DBHB_ECOLI DNA-binding protein HU-beta OS=Escherichia coli (strain K12) OX=83333 GN=hupB PE=1 SV=1	1	4	4	4	3	4	4	3	4	4	3	4	4	3	4	4	3	4	4	3	4	4	52.2	52.2	52.2	9.2255	90	90	0	35.188	By MS/MS	By MS/MS	By MS/MS	By MS/MS	By MS/MS	By MS/MS	34.4	52.2	52.2	34.4	52.2	52.2
P0ACF8	P0ACF8	8	8	8	DNA-binding protein H-NS	hns	sp|P0ACF8|HNS_ECOLI DNA-binding protein H-NS OS=Escherichia coli (strain K12) OX=83333 GN=hns PE=1 SV=2	1	8	8	8	6	7	6	5	6	5	6	7	6	5	6	5	6	7	6	5	6	5	55.5	55.5	55.5	15.539	137	137	0	139.17	By MS/MS	By MS/MS	By MS/MS	By MS/MS	By MS/MS	By MS/MS	46.7	54.7	46.7	31.4	39.4	31.4
P0ACG1	P0ACG1	6	6	6	DNA-binding protein StpA	stpA	sp|P0ACG1|STPA_ECOLI DNA-binding protein StpA OS=Escherichia coli (strain K12) OX=83333 GN=stpA PE=1 SV=1	1	6	6	6	5	3	5	5	5	5	5	3	5	5	5	5	5	3	5	5	5	5	53	53	53	15.347	134	134	0	99.396	By MS/MS	By MS/MS	By MS/MS	By MS/MS	By MS/MS	By MS/MS	38.8	28.4	43.3	43.3	43.3	43.3
P0ACI0	P0ACI0	6	6	6	Right origin-binding protein	rob	sp|P0ACI0|ROB_ECOLI Right origin-binding protein OS=Escherichia coli (strain K12) OX=83333 GN=rob PE=1 SV=1	1	6	6	6	3	4	3	4	4	4	3	4	3	4	4	4	3	4	3	4	4	4	19.7	19.7	19.7	33.144	289	289	0	20.367	By MS/MS	By MS/MS	By MS/MS	By MS/MS	By MS/MS	By MS/MS	9.3	13.5	8.7	12.1	12.1	12.1
P0ACJ0	P0ACJ0	8	8	8	Leucine-responsive regulatory protein	lrp	sp|P0ACJ0|LRP_ECOLI Leucine-responsive regulatory protein OS=Escherichia coli (strain K12) OX=83333 GN=lrp PE=1 SV=2	1	8	8	8	7	5	7	6	7	8	7	5	7	6	7	8	7	5	7	6	7	8	52.4	52.4	52.4	18.887	164	164	0	70.495	By MS/MS	By MS/MS	By MS/MS	By MS/MS	By MS/MS	By MS/MS	47.6	30.5	40.9	31.7	47.6	52.4
P0ACJ8	P0ACJ8	11	11	11	cAMP-activated global transcriptional regulator CRP	crp	sp|P0ACJ8|CRP_ECOLI cAMP-activated global transcriptional regulator CRP OS=Escherichia coli (strain K12) OX=83333 GN=crp PE=1 SV=1	1	11	11	11	7	7	5	11	11	8	7	7	5	11	11	8	7	7	5	11	11	8	55.7	55.7	55.7	23.64	210	210	0	87.227	By MS/MS	By MS/MS	By MS/MS	By MS/MS	By MS/MS	By MS/MS	34.3	35.2	24.8	55.7	55.7	42.9
P0ACK5	P0ACK5	2	2	2	Deoxyribose operon repressor	deoR	sp|P0ACK5|DEOR_ECOLI Deoxyribose operon repressor OS=Escherichia coli (strain K12) OX=83333 GN=deoR PE=1 SV=1	1	2	2	2	1	0	0	1	1	0	1	0	0	1	1	0	1	0	0	1	1	0	7.9	7.9	7.9	28.548	252	252	0	3.9246	By matching			By MS/MS	By MS/MS		3.6	0	0	3.6	4.4	0
P0ACK8	P0ACK8	2	2	2	L-fucose operon activator	fucR	sp|P0ACK8|FUCR_ECOLI L-fucose operon activator OS=Escherichia coli (strain K12) OX=83333 GN=fucR PE=4 SV=1	1	2	2	2	0	0	0	2	1	1	0	0	0	2	1	1	0	0	0	2	1	1	9.1	9.1	9.1	27.362	243	243	0	5.2538				By MS/MS	By MS/MS	By MS/MS	0	0	0	9.1	4.1	4.9
P0ACL0	P0ACL0	8	8	8	Glycerol-3-phosphate regulon repressor	glpR	sp|P0ACL0|GLPR_ECOLI Glycerol-3-phosphate regulon repressor OS=Escherichia coli (strain K12) OX=83333 GN=glpR PE=1 SV=1	1	8	8	8	2	1	2	7	6	6	2	1	2	7	6	6	2	1	2	7	6	6	54.4	54.4	54.4	28.048	252	252	0	80.532	By matching	By MS/MS	By matching	By MS/MS	By MS/MS	By MS/MS	8.7	5.2	8.7	45.6	33.7	33.7
P0ACL2	P0ACL2	6	6	6	Exu regulon transcriptional regulator	exuR	sp|P0ACL2|EXUR_ECOLI Exu regulon transcriptional regulator OS=Escherichia coli (strain K12) OX=83333 GN=exuR PE=4 SV=1	1	6	6	6	1	2	1	4	4	6	1	2	1	4	4	6	1	2	1	4	4	6	34.5	34.5	34.5	29.835	258	258	0	30.595	By matching	By matching	By matching	By MS/MS	By MS/MS	By MS/MS	3.9	10.9	4.3	26.7	23.3	34.5
P0ACL7	P0ACL7	2	2	2	Putative L-lactate dehydrogenase operon regulatory protein	lldR	sp|P0ACL7|LLDR_ECOLI Putative L-lactate dehydrogenase operon regulatory protein OS=Escherichia coli (strain K12) OX=83333 GN=lldR PE=2 SV=1	1	2	2	2	0	0	0	1	1	1	0	0	0	1	1	1	0	0	0	1	1	1	7.4	7.4	7.4	29.166	258	258	0.0021142	3.467				By matching	By MS/MS	By MS/MS	0	0	0	4.3	3.1	4.3
P0ACL9	P0ACL9	1	1	1	Pyruvate dehydrogenase complex repressor	pdhR	sp|P0ACL9|PDHR_ECOLI Pyruvate dehydrogenase complex repressor OS=Escherichia coli (strain K12) OX=83333 GN=pdhR PE=1 SV=1	1	1	1	1	0	0	0	0	1	1	0	0	0	0	1	1	0	0	0	0	1	1	9.1	9.1	9.1	29.425	254	254	0	17.296					By MS/MS	By MS/MS	0	0	0	0	9.1	9.1
P0ACN4	P0ACN4	3	3	3	HTH-type transcriptional repressor AllR	allR	sp|P0ACN4|ALLR_ECOLI HTH-type transcriptional repressor AllR OS=Escherichia coli (strain K12) OX=83333 GN=allR PE=1 SV=1	1	3	3	3	0	0	0	1	0	3	0	0	0	1	0	3	0	0	0	1	0	3	12.2	12.2	12.2	29.269	271	271	0	5.9222				By matching		By MS/MS	0	0	0	5.2	0	12.2
P0ACN7	P0ACN7	3	3	3	HTH-type transcriptional repressor CytR	cytR	sp|P0ACN7|CYTR_ECOLI HTH-type transcriptional repressor CytR OS=Escherichia coli (strain K12) OX=83333 GN=cytR PE=1 SV=1	1	3	3	3	0	0	0	1	1	2	0	0	0	1	1	2	0	0	0	1	1	2	8.8	8.8	8.8	37.819	341	341	0	4.7697				By MS/MS	By MS/MS	By MS/MS	0	0	0	3.2	2.6	6.2
P0ACP1	P0ACP1	6	6	6	Catabolite repressor/activator	cra	sp|P0ACP1|CRA_ECOLI Catabolite repressor/activator OS=Escherichia coli (strain K12) OX=83333 GN=cra PE=1 SV=1	1	6	6	6	1	1	3	5	3	5	1	1	3	5	3	5	1	1	3	5	3	5	24	24	24	37.999	334	334	0	29.199	By matching	By matching	By matching	By MS/MS	By MS/MS	By MS/MS	2.1	2.1	10.8	20.1	10.8	21
P0ACP5	P0ACP5	2	2	2	HTH-type transcriptional regulator GntR	gntR	sp|P0ACP5|GNTR_ECOLI HTH-type transcriptional regulator GntR OS=Escherichia coli (strain K12) OX=83333 GN=gntR PE=1 SV=1	1	2	2	2	1	1	1	2	2	2	1	1	1	2	2	2	1	1	1	2	2	2	5.4	5.4	5.4	36.422	331	331	0	5.9865	By MS/MS	By MS/MS	By MS/MS	By MS/MS	By MS/MS	By MS/MS	2.4	2.4	2.4	5.4	5.4	5.4
P0ACP7	P0ACP7	5	5	5	HTH-type transcriptional repressor PurR	purR	sp|P0ACP7|PURR_ECOLI HTH-type transcriptional repressor PurR OS=Escherichia coli (strain K12) OX=83333 GN=purR PE=1 SV=2	1	5	5	5	2	0	0	3	4	4	2	0	0	3	4	4	2	0	0	3	4	4	22	22	22	38.174	341	341	0	48.318	By matching			By MS/MS	By MS/MS	By MS/MS	7.6	0	0	10.9	18.5	18.5
P0ACQ0	P0ACQ0	2	2	2	Ribose operon repressor	rbsR	sp|P0ACQ0|RBSR_ECOLI Ribose operon repressor OS=Escherichia coli (strain K12) OX=83333 GN=rbsR PE=1 SV=2	1	2	2	2	0	0	0	1	1	0	0	0	0	1	1	0	0	0	0	1	1	0	8.8	8.8	8.8	36.612	330	330	0.0047912	3.0394				By MS/MS	By MS/MS		0	0	0	4.5	4.2	0
P0ACQ4	P0ACQ4	9	9	9	Hydrogen peroxide-inducible genes activator	oxyR	sp|P0ACQ4|OXYR_ECOLI Hydrogen peroxide-inducible genes activator OS=Escherichia coli (strain K12) OX=83333 GN=oxyR PE=1 SV=1	1	9	9	9	2	1	0	8	7	7	2	1	0	8	7	7	2	1	0	8	7	7	39.3	39.3	39.3	34.276	305	305	0	40.355	By matching	By matching		By MS/MS	By MS/MS	By MS/MS	8.9	5.6	0	34.4	31.8	32.8
P0ACQ7	P0ACQ7	4	4	4	HTH-type transcriptional regulator TdcA	tdcA	sp|P0ACQ7|TDCA_ECOLI HTH-type transcriptional regulator TdcA OS=Escherichia coli (strain K12) OX=83333 GN=tdcA PE=3 SV=1	1	4	4	4	0	0	0	3	3	3	0	0	0	3	3	3	0	0	0	3	3	3	16.7	16.7	16.7	34.538	312	312	0	17.665				By MS/MS	By MS/MS	By MS/MS	0	0	0	12.8	12.5	12.8
P0ACR9	P0ACR9	8	8	8	Transcriptional repressor MprA	mprA	sp|P0ACR9|MPRA_ECOLI Transcriptional repressor MprA OS=Escherichia coli (strain K12) OX=83333 GN=mprA PE=2 SV=1	1	8	8	8	5	4	2	7	7	7	5	4	2	7	7	7	5	4	2	7	7	7	69.9	69.9	69.9	20.563	176	176	0	234.81	By MS/MS	By MS/MS	By MS/MS	By MS/MS	By MS/MS	By MS/MS	28.4	23.3	14.8	61.4	64.8	65.3
P0ACS5	P0ACS5	2	2	2	HTH-type transcriptional regulator ZntR	zntR	sp|P0ACS5|ZNTR_ECOLI HTH-type transcriptional regulator ZntR OS=Escherichia coli (strain K12) OX=83333 GN=zntR PE=1 SV=1	1	2	2	2	0	0	1	0	2	1	0	0	1	0	2	1	0	0	1	0	2	1	11.3	11.3	11.3	16.179	141	141	0	4.5244			By matching		By MS/MS	By matching	0	0	6.4	0	11.3	5
P0ACS7	P0ACS7	4	4	4	HTH-type transcriptional regulator RpiR	rpiR	sp|P0ACS7|RPIR_ECOLI HTH-type transcriptional regulator RpiR OS=Escherichia coli (strain K12) OX=83333 GN=rpiR PE=1 SV=1	1	4	4	4	0	0	0	4	0	3	0	0	0	4	0	3	0	0	0	4	0	3	18.9	18.9	18.9	32.362	296	296	0	14.359				By MS/MS		By MS/MS	0	0	0	18.9	0	16.6
P0ACS9	P0ACS9	4	4	4	HTH-type transcriptional regulator AcrR	acrR	sp|P0ACS9|ACRR_ECOLI HTH-type transcriptional regulator AcrR OS=Escherichia coli (strain K12) OX=83333 GN=acrR PE=1 SV=1	1	4	4	4	3	2	1	4	4	3	3	2	1	4	4	3	3	2	1	4	4	3	20.9	20.9	20.9	24.766	215	215	0	19.265	By matching	By MS/MS	By matching	By MS/MS	By MS/MS	By MS/MS	16.7	12.6	4.2	20.9	20.9	16.7
P0ACT6	P0ACT6	2	2	2	HTH-type transcriptional regulator UidR	uidR	sp|P0ACT6|UIDR_ECOLI HTH-type transcriptional regulator UidR OS=Escherichia coli (strain K12) OX=83333 GN=uidR PE=4 SV=1	1	2	2	2	0	0	0	0	2	0	0	0	0	0	2	0	0	0	0	0	2	0	14.3	14.3	14.3	21.799	196	196	0	13.473					By MS/MS		0	0	0	0	14.3	0
P0ACU5	P0ACU5	3	3	3	HTH-type transcriptional repressor FabR	fabR	sp|P0ACU5|FABR_ECOLI HTH-type transcriptional repressor FabR OS=Escherichia coli (strain K12) OX=83333 GN=fabR PE=1 SV=2	1	3	3	3	0	0	0	1	1	1	0	0	0	1	1	1	0	0	0	1	1	1	12	12	12	26.553	234	234	0	7.7551				By MS/MS	By MS/MS	By MS/MS	0	0	0	3.8	3.4	4.7
P0ACV0	P0ACV0	3	3	3	Lipid A biosynthesis lauroyltransferase	lpxL	sp|P0ACV0|LPXL_ECOLI Lipid A biosynthesis lauroyltransferase OS=Escherichia coli (strain K12) OX=83333 GN=lpxL PE=1 SV=1	1	3	3	3	1	0	1	2	3	2	1	0	1	2	3	2	1	0	1	2	3	2	12.4	12.4	12.4	35.406	306	306	0	13.057	By MS/MS		By matching	By MS/MS	By MS/MS	By MS/MS	4.9	0	4.9	8.8	12.4	8.5
P0ACX3	P0ACX3	3	3	3	Putative monooxygenase YdhR	ydhR	sp|P0ACX3|YDHR_ECOLI Putative monooxygenase YdhR OS=Escherichia coli (strain K12) OX=83333 GN=ydhR PE=1 SV=1	1	3	3	3	1	0	1	2	2	1	1	0	1	2	2	1	1	0	1	2	2	1	38.6	38.6	38.6	11.288	101	101	0	7.0326	By MS/MS		By MS/MS	By MS/MS	By MS/MS	By MS/MS	9.9	0	9.9	23.8	24.8	9.9
P0ACY1	P0ACY1	4	4	4	Putative NAD(P)H nitroreductase YdjA	ydjA	sp|P0ACY1|YDJA_ECOLI Putative NAD(P)H nitroreductase YdjA OS=Escherichia coli (strain K12) OX=83333 GN=ydjA PE=1 SV=1	1	4	4	4	4	3	3	4	3	3	4	3	3	4	3	3	4	3	3	4	3	3	29.5	29.5	29.5	20.059	183	183	0	32.962	By MS/MS	By MS/MS	By MS/MS	By MS/MS	By MS/MS	By MS/MS	29.5	24	24	29.5	24	24
P0ACY3	P0ACY3	8	8	8	Uncharacterized protein YeaG	yeaG	sp|P0ACY3|YEAG_ECOLI Uncharacterized protein YeaG OS=Escherichia coli (strain K12) OX=83333 GN=yeaG PE=3 SV=1	1	8	8	8	0	0	0	4	7	5	0	0	0	4	7	5	0	0	0	4	7	5	17.1	17.1	17.1	74.479	644	644	0	22.238				By MS/MS	By MS/MS	By MS/MS	0	0	0	7.9	14.4	11
P0ACZ4	P0ACZ4	7	7	7	Positive transcription regulator EvgA	evgA	sp|P0ACZ4|EVGA_ECOLI DNA-binding transcriptional activator EvgA OS=Escherichia coli (strain K12) OX=83333 GN=evgA PE=1 SV=1	1	7	7	7	7	6	7	5	6	7	7	6	7	5	6	7	7	6	7	5	6	7	44.1	44.1	44.1	22.69	204	204	0	91.449	By MS/MS	By MS/MS	By MS/MS	By MS/MS	By MS/MS	By MS/MS	44.1	38.2	44.1	29.4	38.2	44.1
P0AD05	P0AD05	3	3	3	Uncharacterized protein YecA	yecA	sp|P0AD05|YECA_ECOLI Uncharacterized protein YecA OS=Escherichia coli (strain K12) OX=83333 GN=yecA PE=4 SV=1	1	3	3	3	1	0	0	1	1	3	1	0	0	1	1	3	1	0	0	1	1	3	27.6	27.6	27.6	25.039	221	221	0	7.5626	By MS/MS			By matching	By matching	By MS/MS	14.5	0	0	6.8	6.3	27.6
P0AD07	P0AD07	2	2	2	Uncharacterized protein YecF	yecF	sp|P0AD07|YECF_ECOLI Uncharacterized protein YecF OS=Escherichia coli (strain K12) OX=83333 GN=yecF PE=4 SV=1	1	2	2	2	0	1	0	1	2	1	0	1	0	1	2	1	0	1	0	1	2	1	51.4	51.4	51.4	8.2385	74	74	0	25.387		By MS/MS		By MS/MS	By MS/MS	By MS/MS	0	21.6	0	21.6	51.4	29.7
P0AD10	P0AD10	2	2	2	Uncharacterized protein YecJ	yecJ	sp|P0AD10|YECJ_ECOLI Uncharacterized protein YecJ OS=Escherichia coli (strain K12) OX=83333 GN=yecJ PE=4 SV=1	1	2	2	2	1	0	0	2	1	1	1	0	0	2	1	1	1	0	0	2	1	1	27.7	27.7	27.7	9.1225	83	83	0	48.326	By MS/MS			By MS/MS	By matching	By MS/MS	9.6	0	0	27.7	18.1	18.1
P0AD12	P0AD12	8	8	8	Protein YeeZ	yeeZ	sp|P0AD12|YEEZ_ECOLI Protein YeeZ OS=Escherichia coli (strain K12) OX=83333 GN=yeeZ PE=1 SV=1	1	8	8	8	0	1	1	6	5	5	0	1	1	6	5	5	0	1	1	6	5	5	40.1	40.1	40.1	29.68	274	274	0	95.406		By MS/MS	By matching	By MS/MS	By MS/MS	By MS/MS	0	2.9	3.3	29.6	20.8	20.8
P0AD24	P0AD24	2	2	2	UPF0352 protein YejL	yejL	sp|P0AD24|YEJL_ECOLI UPF0352 protein YejL OS=Escherichia coli (strain K12) OX=83333 GN=yejL PE=1 SV=1	1	2	2	2	1	2	2	2	2	2	1	2	2	2	2	2	1	2	2	2	2	2	25.3	25.3	25.3	8.2884	75	75	0	6.6372	By matching	By MS/MS	By matching	By MS/MS	By MS/MS	By MS/MS	13.3	25.3	25.3	25.3	25.3	25.3
P0AD33	P0AD33	2	2	2	UPF0381 protein YfcZ	yfcZ	sp|P0AD33|YFCZ_ECOLI UPF0381 protein YfcZ OS=Escherichia coli (strain K12) OX=83333 GN=yfcZ PE=3 SV=1	1	2	2	2	2	2	1	2	2	1	2	2	1	2	2	1	2	2	1	2	2	1	27.7	27.7	27.7	10.318	94	94	0	14.217	By MS/MS	By MS/MS	By MS/MS	By MS/MS	By MS/MS	By MS/MS	27.7	27.7	13.8	27.7	27.7	13.8
P0AD42	P0AD42	5	5	5	Phosphatidylglycerophosphatase C	pgpC	sp|P0AD42|PGPC_ECOLI Phosphatidylglycerophosphatase C OS=Escherichia coli (strain K12) OX=83333 GN=pgpC PE=1 SV=1	1	5	5	5	0	0	0	2	4	4	0	0	0	2	4	4	0	0	0	2	4	4	28.4	28.4	28.4	24.439	211	211	0	25.052				By MS/MS	By MS/MS	By MS/MS	0	0	0	14.7	22.7	18.5
P0AD49	P0AD49	4	4	4	Ribosome-associated inhibitor A	raiA	sp|P0AD49|YFIA_ECOLI Ribosome-associated inhibitor A OS=Escherichia coli (strain K12) OX=83333 GN=raiA PE=1 SV=2	1	4	4	4	4	3	2	4	4	3	4	3	2	4	4	3	4	3	2	4	4	3	50.4	50.4	50.4	12.784	113	113	0	153.05	By MS/MS	By MS/MS	By MS/MS	By MS/MS	By MS/MS	By MS/MS	50.4	40.7	20.4	50.4	50.4	30.1
P0AD53	P0AD53	6	6	6	Uncharacterized protein YgaC	ygaC	sp|P0AD53|YGAC_ECOLI Uncharacterized protein YgaC OS=Escherichia coli (strain K12) OX=83333 GN=ygaC PE=4 SV=1	1	6	6	6	3	2	4	3	2	3	3	2	4	3	2	3	3	2	4	3	2	3	46.5	46.5	46.5	13.066	114	114	0	15.315	By MS/MS	By MS/MS	By MS/MS	By MS/MS	By matching	By MS/MS	19.3	20.2	36.8	28.1	18.4	27.2
P0AD57	P0AD57	2	2	2	Octaprenyl-diphosphate synthase	ispB	sp|P0AD57|ISPB_ECOLI Octaprenyl diphosphate synthase OS=Escherichia coli (strain K12) OX=83333 GN=ispB PE=1 SV=1	1	2	2	2	0	2	1	0	2	0	0	2	1	0	2	0	0	2	1	0	2	0	6.5	6.5	6.5	35.217	323	323	0	12.491		By matching	By matching		By MS/MS		0	6.5	2.2	0	6.5	0
P0AD61	P0AD61	27	27	27	Pyruvate kinase I	pykF	sp|P0AD61|KPYK1_ECOLI Pyruvate kinase I OS=Escherichia coli (strain K12) OX=83333 GN=pykF PE=1 SV=1	1	27	27	27	23	21	16	25	25	25	23	21	16	25	25	25	23	21	16	25	25	25	67.2	67.2	67.2	50.729	470	470	0	323.31	By MS/MS	By MS/MS	By MS/MS	By MS/MS	By MS/MS	By MS/MS	63	61.5	42.8	62.8	64.7	65.3
P0AD65	P0AD65	3	3	3	Penicillin-binding protein 2	mrdA	sp|P0AD65|MRDA_ECOLI Peptidoglycan D,D-transpeptidase MrdA OS=Escherichia coli (strain K12) OX=83333 GN=mrdA PE=1 SV=1	1	3	3	3	1	0	0	1	1	2	1	0	0	1	1	2	1	0	0	1	1	2	7	7	7	70.856	633	633	0	7.0838	By matching			By MS/MS	By MS/MS	By MS/MS	1.9	0	0	1.9	2.7	5.1
P0AD68	P0AD68	2	2	2	Peptidoglycan synthase FtsI	ftsI	sp|P0AD68|FTSI_ECOLI Peptidoglycan D,D-transpeptidase FtsI OS=Escherichia coli (strain K12) OX=83333 GN=ftsI PE=1 SV=1	1	2	2	2	1	0	0	2	1	1	1	0	0	2	1	1	1	0	0	2	1	1	4.3	4.3	4.3	63.877	588	588	0	6.4183	By matching			By matching	By MS/MS	By MS/MS	1.7	0	0	4.3	2.6	1.7
P0AD99	P0AD99	2	2	2	Branched-chain amino acid transport system 2 carrier protein	brnQ	sp|P0AD99|BRNQ_ECOLI Branched-chain amino acid transport system 2 carrier protein OS=Escherichia coli (strain K12) OX=83333 GN=brnQ PE=1 SV=1	1	2	2	2	1	1	2	1	1	2	1	1	2	1	1	2	1	1	2	1	1	2	6.4	6.4	6.4	46.208	439	439	0	9.8735	By MS/MS	By MS/MS	By MS/MS	By MS/MS	By MS/MS	By MS/MS	3.2	3.2	6.4	3.2	3.2	6.4
P0ADA3	P0ADA3	3	3	3	Murein hydrolase activator NlpD	nlpD	sp|P0ADA3|NLPD_ECOLI Murein hydrolase activator NlpD OS=Escherichia coli (strain K12) OX=83333 GN=nlpD PE=1 SV=1	1	3	3	3	1	1	0	1	1	2	1	1	0	1	1	2	1	1	0	1	1	2	9.5	9.5	9.5	40.149	379	379	0	5.9853	By matching	By MS/MS		By MS/MS	By MS/MS	By MS/MS	2.4	2.4	0	2.4	2.4	7.1
P0ADA5	P0ADA5	5	5	5	Uncharacterized lipoprotein YajG	yajG	sp|P0ADA5|YAJG_ECOLI Uncharacterized lipoprotein YajG OS=Escherichia coli (strain K12) OX=83333 GN=yajG PE=3 SV=1	1	5	5	5	2	4	5	4	5	5	2	4	5	4	5	5	2	4	5	4	5	5	39.6	39.6	39.6	20.95	192	192	0	117.04	By MS/MS	By MS/MS	By MS/MS	By MS/MS	By MS/MS	By MS/MS	21.9	25	39.6	34.9	39.6	39.6
P0ADB1	P0ADB1	2	2	2	Osmotically-inducible lipoprotein E	osmE	sp|P0ADB1|OSME_ECOLI Osmotically-inducible putative lipoprotein OsmE OS=Escherichia coli (strain K12) OX=83333 GN=osmE PE=2 SV=1	1	2	2	2	2	2	1	1	1	1	2	2	1	1	1	1	2	2	1	1	1	1	17.9	17.9	17.9	12.021	112	112	0	5.0801	By MS/MS	By MS/MS	By MS/MS	By MS/MS	By matching	By MS/MS	17.9	17.9	8	8	8	8
P0ADB7	P0ADB7	1	1	1	Entericidin B	ecnB	sp|P0ADB7|ECNB_ECOLI Entericidin B OS=Escherichia coli (strain K12) OX=83333 GN=ecnB PE=3 SV=1	1	1	1	1	1	1	1	1	1	1	1	1	1	1	1	1	1	1	1	1	1	1	39.6	39.6	39.6	4.8095	48	48	0	42.255	By MS/MS	By MS/MS	By MS/MS	By MS/MS	By MS/MS	By MS/MS	39.6	39.6	39.6	39.6	39.6	39.6
P0ADC1	P0ADC1	2	2	2	LPS-assembly lipoprotein LptE	lptE	sp|P0ADC1|LPTE_ECOLI LPS-assembly lipoprotein LptE OS=Escherichia coli (strain K12) OX=83333 GN=lptE PE=1 SV=1	1	2	2	2	0	1	0	0	2	0	0	1	0	0	2	0	0	1	0	0	2	0	13	13	13	21.356	193	193	0	7.5247		By MS/MS			By MS/MS		0	3.6	0	0	13	0
P0ADC3	P0ADC3	1	1	1	Lipoprotein-releasing system transmembrane protein LolC	lolC	sp|P0ADC3|LOLC_ECOLI Lipoprotein-releasing system transmembrane protein LolC OS=Escherichia coli (strain K12) OX=83333 GN=lolC PE=1 SV=1	1	1	1	1	1	1	0	1	1	1	1	1	0	1	1	1	1	1	0	1	1	1	3.8	3.8	3.8	43.263	399	399	0.0021337	3.5772	By matching	By matching		By matching	By MS/MS	By MS/MS	3.8	3.8	0	3.8	3.8	3.8
P0ADC6	P0ADC6	3	3	3	Lipopolysaccharide export system permease protein LptG	lptG	sp|P0ADC6|LPTG_ECOLI Lipopolysaccharide export system permease protein LptG OS=Escherichia coli (strain K12) OX=83333 GN=lptG PE=1 SV=1	1	3	3	3	3	0	0	3	2	2	3	0	0	3	2	2	3	0	0	3	2	2	12.2	12.2	12.2	39.618	360	360	0	8.944	By MS/MS			By MS/MS	By MS/MS	By MS/MS	12.2	0	0	12.2	9.4	6.4
P0ADE6	P0ADE6	5	5	5	Uncharacterized protein YgaU	ygaU	sp|P0ADE6|KBP_ECOLI Potassium binding protein Kbp OS=Escherichia coli (strain K12) OX=83333 GN=kbp PE=1 SV=2	1	5	5	5	3	5	3	2	4	3	3	5	3	2	4	3	3	5	3	2	4	3	36.9	36.9	36.9	16.063	149	149	0	13.375	By MS/MS	By MS/MS	By MS/MS	By MS/MS	By MS/MS	By MS/MS	22.1	36.9	22.1	14.8	30.9	22.1
P0ADE8	P0ADE8	11	11	11	tRNA-modifying protein YgfZ	ygfZ	sp|P0ADE8|YGFZ_ECOLI tRNA-modifying protein YgfZ OS=Escherichia coli (strain K12) OX=83333 GN=ygfZ PE=1 SV=2	1	11	11	11	6	8	9	7	8	9	6	8	9	7	8	9	6	8	9	7	8	9	37.1	37.1	37.1	36.094	326	326	0	59.976	By MS/MS	By MS/MS	By MS/MS	By MS/MS	By MS/MS	By MS/MS	21.2	29.4	31	23.9	26.1	31
P0ADF8	P0ADF8	1	1	1	Acetolactate synthase isozyme 1 small subunit	ilvN	sp|P0ADF8|ILVN_ECOLI Acetolactate synthase isozyme 1 small subunit OS=Escherichia coli (strain K12) OX=83333 GN=ilvN PE=1 SV=1	1	1	1	1	0	0	0	0	1	0	0	0	0	0	1	0	0	0	0	0	1	0	10.4	10.4	10.4	11.106	96	96	0.0021038	3.395					By MS/MS		0	0	0	0	10.4	0
P0ADG4	P0ADG4	13	13	13	Inositol-1-monophosphatase	suhB	sp|P0ADG4|SUHB_ECOLI Nus factor SuhB OS=Escherichia coli (strain K12) OX=83333 GN=suhB PE=1 SV=1	1	13	13	13	10	12	9	11	11	11	10	12	9	11	11	11	10	12	9	11	11	11	70	70	70	29.172	267	267	0	122.32	By MS/MS	By MS/MS	By MS/MS	By MS/MS	By MS/MS	By MS/MS	49.4	56.2	49.1	62.5	52.1	62.5
P0ADG7	P0ADG7	20	20	20	Inosine-5-monophosphate dehydrogenase	guaB	sp|P0ADG7|IMDH_ECOLI Inosine-5-monophosphate dehydrogenase OS=Escherichia coli (strain K12) OX=83333 GN=guaB PE=1 SV=1	1	20	20	20	15	13	12	19	20	20	15	13	12	19	20	20	15	13	12	19	20	20	70.1	70.1	70.1	52.022	488	488	0	323.31	By MS/MS	By MS/MS	By MS/MS	By MS/MS	By MS/MS	By MS/MS	51.4	46.9	45.5	68	70.1	70.1
P0ADI4	P0ADI4	8	8	8	Enterobactin synthase component B;Isochorismatase;Aryl carrier protein	entB	sp|P0ADI4|ENTB_ECOLI Enterobactin synthase component B OS=Escherichia coli (strain K12) OX=83333 GN=entB PE=1 SV=1	1	8	8	8	0	3	1	5	8	6	0	3	1	5	8	6	0	3	1	5	8	6	33.7	33.7	33.7	32.554	285	285	0	30.02		By MS/MS	By matching	By MS/MS	By MS/MS	By MS/MS	0	13	4.2	22.1	33.7	24.9
P0ADK0	P0ADK0	4	4	4	Uncharacterized protein YiaF	yiaF	sp|P0ADK0|YIAF_ECOLI Uncharacterized protein YiaF OS=Escherichia coli (strain K12) OX=83333 GN=yiaF PE=4 SV=2	1	4	4	4	3	2	3	3	4	4	3	2	3	3	4	4	3	2	3	3	4	4	21.2	21.2	21.2	25.663	236	236	0	22.105	By MS/MS	By MS/MS	By MS/MS	By MS/MS	By MS/MS	By MS/MS	14	11	16.5	14	21.2	21.2
P0ADN2	P0ADN2	5	5	5	UPF0438 protein YifE	yifE	sp|P0ADN2|YIFE_ECOLI UPF0438 protein YifE OS=Escherichia coli (strain K12) OX=83333 GN=yifE PE=1 SV=2	1	5	5	5	4	4	2	3	3	4	4	4	2	3	3	4	4	4	2	3	3	4	41.1	41.1	41.1	13.133	112	112	0	32.079	By MS/MS	By MS/MS	By MS/MS	By MS/MS	By MS/MS	By MS/MS	31.2	34.8	18.8	25	26.8	34.8
P0ADP2	P0ADP2	7	7	7	Uncharacterized protein YigI	yigI	sp|P0ADP2|YIGI_ECOLI Uncharacterized protein YigI OS=Escherichia coli (strain K12) OX=83333 GN=yigI PE=4 SV=1	1	7	7	7	7	6	5	5	7	4	7	6	5	5	7	4	7	6	5	5	7	4	39.4	39.4	39.4	17.163	155	155	0	31.093	By MS/MS	By MS/MS	By MS/MS	By MS/MS	By MS/MS	By MS/MS	39.4	34.2	28.4	28.4	39.4	22.6
P0ADP9	P0ADP9	2	2	2	Protein YihD	yihD	sp|P0ADP9|YIHD_ECOLI Protein YihD OS=Escherichia coli (strain K12) OX=83333 GN=yihD PE=1 SV=1	1	2	2	2	0	1	1	0	0	1	0	1	1	0	0	1	0	1	1	0	0	1	25.8	25.8	25.8	10.273	89	89	0.0066534	2.6636		By MS/MS	By MS/MS			By matching	0	10.1	15.7	0	0	15.7
P0ADQ2	P0ADQ2	8	8	8	Uncharacterized protein YiiD	yiiD	sp|P0ADQ2|FABY_ECOLI Probable acyltransferase FabY OS=Escherichia coli (strain K12) OX=83333 GN=fabY PE=2 SV=1	1	8	8	8	0	2	1	5	6	4	0	2	1	5	6	4	0	2	1	5	6	4	27.7	27.7	27.7	37.094	329	329	0	47.014		By MS/MS	By matching	By MS/MS	By MS/MS	By MS/MS	0	5.5	3.3	18.5	20.1	14
P0ADR6	P0ADR6	7	7	7	Ribosomal RNA large subunit methyltransferase M	rlmM	sp|P0ADR6|RLMM_ECOLI Ribosomal RNA large subunit methyltransferase M OS=Escherichia coli (strain K12) OX=83333 GN=rlmM PE=1 SV=1	1	7	7	7	5	3	3	6	5	4	5	3	3	6	5	4	5	3	3	6	5	4	21.6	21.6	21.6	41.905	366	366	0	24.926	By MS/MS	By MS/MS	By MS/MS	By MS/MS	By MS/MS	By MS/MS	14.5	8.2	9.8	17.8	16.7	12.8
P0ADR8	P0ADR8	19	19	19	LOG family protein YgdH	ygdH	sp|P0ADR8|PPNN_ECOLI Pyrimidine/purine nucleotide 5-monophosphate nucleosidase OS=Escherichia coli (strain K12) OX=83333 GN=ppnN PE=1 SV=1	1	19	19	19	8	4	4	17	18	15	8	4	4	17	18	15	8	4	4	17	18	15	58.8	58.8	58.8	50.971	454	454	0	166.11	By MS/MS	By MS/MS	By matching	By MS/MS	By MS/MS	By MS/MS	20.7	10.8	9	51.3	52.2	41.6
P0ADS2	P0ADS2	2	2	2	Cell division protein ZapA	zapA	sp|P0ADS2|ZAPA_ECOLI Cell division protein ZapA OS=Escherichia coli (strain K12) OX=83333 GN=zapA PE=1 SV=1	1	2	2	2	1	2	2	2	2	2	1	2	2	2	2	2	1	2	2	2	2	2	25.7	25.7	25.7	12.594	109	109	0	20.515	By MS/MS	By MS/MS	By MS/MS	By MS/MS	By MS/MS	By MS/MS	11.9	25.7	25.7	25.7	25.7	25.7
P0ADS6	P0ADS6	9	9	9	Uncharacterized protein YggE	yggE	sp|P0ADS6|YGGE_ECOLI Uncharacterized protein YggE OS=Escherichia coli (strain K12) OX=83333 GN=yggE PE=4 SV=1	1	9	9	9	9	6	9	9	6	9	9	6	9	9	6	9	9	6	9	9	6	9	39.8	39.8	39.8	26.635	246	246	0	209.9	By MS/MS	By MS/MS	By MS/MS	By MS/MS	By MS/MS	By MS/MS	39.8	26.8	39.8	39.8	31.3	39.8
P0ADS9	P0ADS9	2	2	2	Uncharacterized protein YggN	yggN	sp|P0ADS9|YGGN_ECOLI Uncharacterized protein YggN OS=Escherichia coli (strain K12) OX=83333 GN=yggN PE=4 SV=1	1	2	2	2	0	0	1	0	1	2	0	0	1	0	1	2	0	0	1	0	1	2	10.9	10.9	10.9	26.429	239	239	0.0047814	3.0315			By matching		By MS/MS	By MS/MS	0	0	5.4	0	5.4	10.9
P0ADT2	P0ADT2	5	5	5	UPF0441 protein YgiB	ygiB	sp|P0ADT2|YGIB_ECOLI UPF0441 protein YgiB OS=Escherichia coli (strain K12) OX=83333 GN=ygiB PE=3 SV=2	1	5	5	5	3	1	3	4	3	4	3	1	3	4	3	4	3	1	3	4	3	4	30.9	30.9	30.9	23.479	223	223	0	11.098	By matching	By matching	By matching	By MS/MS	By MS/MS	By MS/MS	13.9	4	13.9	21.5	13.9	23.3
P0ADT5	P0ADT5	7	7	7	Putative acid--amine ligase YgiC	ygiC	sp|P0ADT5|YGIC_ECOLI Putative acid--amine ligase YgiC OS=Escherichia coli (strain K12) OX=83333 GN=ygiC PE=1 SV=1	1	7	7	7	1	0	1	4	4	5	1	0	1	4	4	5	1	0	1	4	4	5	21.2	21.2	21.2	45.025	386	386	0	15.476	By matching		By matching	By MS/MS	By MS/MS	By MS/MS	3.1	0	2.3	14.2	8.8	17.4
P0ADT8	P0ADT8	4	4	4	Uncharacterized protein YgiM	ygiM	sp|P0ADT8|YGIM_ECOLI Uncharacterized protein YgiM OS=Escherichia coli (strain K12) OX=83333 GN=ygiM PE=3 SV=1	1	4	4	4	1	1	0	4	1	2	1	1	0	4	1	2	1	1	0	4	1	2	20.4	20.4	20.4	23.076	206	206	0	13.153	By MS/MS	By matching		By MS/MS	By MS/MS	By MS/MS	5.3	5.3	0	20.4	5.8	9.7
P0ADU2	P0ADU2	3	3	3	Probable quinol monooxygenase YgiN	ygiN	sp|P0ADU2|YGIN_ECOLI Probable quinol monooxygenase YgiN OS=Escherichia coli (strain K12) OX=83333 GN=ygiN PE=1 SV=1	1	3	3	3	1	2	1	3	3	2	1	2	1	3	3	2	1	2	1	3	3	2	26	26	26	11.532	104	104	0	12.122	By MS/MS	By MS/MS	By MS/MS	By MS/MS	By MS/MS	By MS/MS	8.7	17.3	8.7	26	26	17.3
P0ADV1	P0ADV1	2	2	2	Lipopolysaccharide export system protein LptA	lptA	sp|P0ADV1|LPTA_ECOLI Lipopolysaccharide export system protein LptA OS=Escherichia coli (strain K12) OX=83333 GN=lptA PE=1 SV=1	1	2	2	2	1	0	0	1	1	0	1	0	0	1	1	0	1	0	0	1	1	0	17.3	17.3	17.3	20.127	185	185	0	9.5122	By matching			By MS/MS	By MS/MS		7	0	0	7	10.3	0
P0ADV5	P0ADV5	7	7	7	Uncharacterized protein YhbW	yhbW	sp|P0ADV5|YHBW_ECOLI Luciferase-like monooxygenase OS=Escherichia coli (strain K12) OX=83333 GN=yhbW PE=4 SV=1	1	7	7	7	3	1	1	3	4	4	3	1	1	3	4	4	3	1	1	3	4	4	26	26	26	37.129	335	335	0	71.885	By MS/MS	By MS/MS	By MS/MS	By MS/MS	By MS/MS	By MS/MS	8.1	3.6	3.6	11.3	14.9	17.3
P0ADV7	P0ADV7	9	9	9	Probable phospholipid-binding protein MlaC	mlaC	sp|P0ADV7|MLAC_ECOLI Intermembrane phospholipid transport system binding protein MlaC OS=Escherichia coli (strain K12) OX=83333 GN=mlaC PE=1 SV=1	1	9	9	9	7	5	2	9	5	8	7	5	2	9	5	8	7	5	2	9	5	8	41.2	41.2	41.2	23.962	211	211	0	54.509	By MS/MS	By MS/MS	By matching	By MS/MS	By MS/MS	By MS/MS	28.4	27	10	41.2	27.5	37.9
P0ADV9	P0ADV9	2	2	2	Lipopolysaccharide export system protein LptC	lptC	sp|P0ADV9|LPTC_ECOLI Lipopolysaccharide export system protein LptC OS=Escherichia coli (strain K12) OX=83333 GN=lptC PE=1 SV=1	1	2	2	2	1	1	0	1	2	2	1	1	0	1	2	2	1	1	0	1	2	2	12.6	12.6	12.6	21.702	191	191	0	7.6654	By matching	By matching		By matching	By MS/MS	By MS/MS	4.2	4.2	0	4.2	12.6	12.6
P0ADW3	P0ADW3	7	7	7	Inner membrane protein YhcB	yhcB	sp|P0ADW3|YHCB_ECOLI Inner membrane protein YhcB OS=Escherichia coli (strain K12) OX=83333 GN=yhcB PE=1 SV=2	1	7	7	7	6	2	6	6	7	7	6	2	6	6	7	7	6	2	6	6	7	7	64.4	64.4	64.4	14.961	132	132	0	55.052	By MS/MS	By MS/MS	By MS/MS	By MS/MS	By MS/MS	By MS/MS	64.4	16.7	64.4	64.4	64.4	64.4
P0ADY1	P0ADY1	31	31	31	Peptidyl-prolyl cis-trans isomerase D	ppiD	sp|P0ADY1|PPID_ECOLI Periplasmic chaperone PpiD OS=Escherichia coli (strain K12) OX=83333 GN=ppiD PE=1 SV=1	1	31	31	31	13	12	13	22	27	25	13	12	13	22	27	25	13	12	13	22	27	25	64	64	64	68.149	623	623	0	306.2	By MS/MS	By MS/MS	By MS/MS	By MS/MS	By MS/MS	By MS/MS	25.5	23.4	23.8	43.8	56.7	57.1
P0ADY3	P0ADY3	5	5	5	50S ribosomal protein L14	rplN	sp|P0ADY3|RL14_ECOLI 50S ribosomal protein L14 OS=Escherichia coli (strain K12) OX=83333 GN=rplN PE=1 SV=1	1	5	5	5	5	4	5	5	5	5	5	4	5	5	5	5	5	4	5	5	5	5	51.2	51.2	51.2	13.541	123	123	0	155.47	By MS/MS	By MS/MS	By MS/MS	By MS/MS	By MS/MS	By MS/MS	51.2	44.7	51.2	51.2	51.2	51.2
P0ADY7	P0ADY7	5	5	5	50S ribosomal protein L16	rplP	sp|P0ADY7|RL16_ECOLI 50S ribosomal protein L16 OS=Escherichia coli (strain K12) OX=83333 GN=rplP PE=1 SV=1	1	5	5	5	4	5	4	4	4	4	4	5	4	4	4	4	4	5	4	4	4	4	43.4	43.4	43.4	15.281	136	136	0	93.809	By MS/MS	By MS/MS	By MS/MS	By MS/MS	By MS/MS	By MS/MS	39.7	43.4	39.7	39.7	39.7	39.7
P0ADZ0	P0ADZ0	2	2	2	50S ribosomal protein L23	rplW	sp|P0ADZ0|RL23_ECOLI 50S ribosomal protein L23 OS=Escherichia coli (strain K12) OX=83333 GN=rplW PE=1 SV=1	1	2	2	2	0	1	1	1	2	2	0	1	1	1	2	2	0	1	1	1	2	2	27	27	27	11.199	100	100	0	59.231		By MS/MS	By MS/MS	By MS/MS	By MS/MS	By MS/MS	0	12	12	15	27	27
P0ADZ4	P0ADZ4	4	4	4	30S ribosomal protein S15	rpsO	sp|P0ADZ4|RS15_ECOLI 30S ribosomal protein S15 OS=Escherichia coli (strain K12) OX=83333 GN=rpsO PE=1 SV=2	1	4	4	4	4	4	4	4	4	4	4	4	4	4	4	4	4	4	4	4	4	4	59.6	59.6	59.6	10.269	89	89	0	91.806	By MS/MS	By MS/MS	By MS/MS	By MS/MS	By MS/MS	By MS/MS	59.6	59.6	59.6	59.6	59.6	59.6
P0ADZ7	P0ADZ7	3	3	3	UPF0092 membrane protein YajC	yajC	sp|P0ADZ7|YAJC_ECOLI Sec translocon accessory complex subunit YajC OS=Escherichia coli (strain K12) OX=83333 GN=yajC PE=1 SV=1	1	3	3	3	3	1	2	3	2	2	3	1	2	3	2	2	3	1	2	3	2	2	20.9	20.9	20.9	11.887	110	110	0	26.314	By MS/MS	By MS/MS	By MS/MS	By MS/MS	By MS/MS	By MS/MS	20.9	11.8	20	20.9	20	20
P0AE01	P0AE01	7	7	7	tRNA (cytidine/uridine-2-O-)-methyltransferase TrmJ	trmJ	sp|P0AE01|TRMJ_ECOLI tRNA (cytidine/uridine-2-O-)-methyltransferase TrmJ OS=Escherichia coli (strain K12) OX=83333 GN=trmJ PE=1 SV=1	1	7	7	7	1	2	0	4	3	5	1	2	0	4	3	5	1	2	0	4	3	5	41.9	41.9	41.9	27.048	246	246	0	76.084	By MS/MS	By MS/MS		By MS/MS	By MS/MS	By MS/MS	4.5	11	0	19.9	19.9	32.9
P0AE06;P24180	P0AE06	16;1	16;1	16;1	Multidrug efflux pump subunit AcrA	acrA	sp|P0AE06|ACRA_ECOLI Multidrug efflux pump subunit AcrA OS=Escherichia coli (strain K12) OX=83333 GN=acrA PE=1 SV=1	2	16	16	16	12	10	11	14	13	13	12	10	11	14	13	13	12	10	11	14	13	13	50.9	50.9	50.9	42.196	397	397;385	0	93.21	By MS/MS	By MS/MS	By MS/MS	By MS/MS	By MS/MS	By MS/MS	37	31.2	33.2	45.1	41.1	40.8
P0AE08	P0AE08	10	10	10	Alkyl hydroperoxide reductase subunit C	ahpC	sp|P0AE08|AHPC_ECOLI Alkyl hydroperoxide reductase C OS=Escherichia coli (strain K12) OX=83333 GN=ahpC PE=1 SV=2	1	10	10	10	7	7	7	10	7	7	7	7	7	10	7	7	7	7	7	10	7	7	64.2	64.2	64.2	20.761	187	187	0	130.21	By MS/MS	By MS/MS	By MS/MS	By MS/MS	By MS/MS	By MS/MS	53.5	42.8	56.1	64.2	56.1	56.1
P0AE18	P0AE18	13	13	13	Methionine aminopeptidase	map	sp|P0AE18|MAP1_ECOLI Methionine aminopeptidase OS=Escherichia coli (strain K12) OX=83333 GN=map PE=1 SV=1	1	13	13	13	11	10	10	12	11	10	11	10	10	12	11	10	11	10	10	12	11	10	51.9	51.9	51.9	29.33	264	264	0	102.77	By MS/MS	By MS/MS	By MS/MS	By MS/MS	By MS/MS	By MS/MS	43.2	40.2	42.8	48.5	47	38.3
P0AE22	P0AE22	2	2	2	Class B acid phosphatase	aphA	sp|P0AE22|APHA_ECOLI Class B acid phosphatase OS=Escherichia coli (strain K12) OX=83333 GN=aphA PE=1 SV=1	1	2	2	2	0	2	2	0	2	2	0	2	2	0	2	2	0	2	2	0	2	2	10.5	10.5	10.5	26.103	237	237	0	8.0875		By MS/MS	By MS/MS		By MS/MS	By MS/MS	0	10.5	10.5	0	10.5	10.5
P0AE45	P0AE45	3	3	3	UPF0053 inner membrane protein YtfL	ytfL	sp|P0AE45|PAEA_ECOLI Polyamine export protein OS=Escherichia coli (strain K12) OX=83333 GN=paeA PE=1 SV=1	1	3	3	3	0	0	0	3	1	3	0	0	0	3	1	3	0	0	0	3	1	3	8.5	8.5	8.5	49.762	447	447	0	9.9693				By MS/MS	By MS/MS	By MS/MS	0	0	0	8.5	1.8	8.5
P0AE48	P0AE48	2	2	2	Gamma-glutamylcyclotransferase family protein YtfP	ytfP	sp|P0AE48|YTFP_ECOLI Gamma-glutamylcyclotransferase family protein YtfP OS=Escherichia coli (strain K12) OX=83333 GN=ytfP PE=1 SV=1	1	2	2	2	1	1	2	1	0	1	1	1	2	1	0	1	1	1	2	1	0	1	18.6	18.6	18.6	12.866	113	113	0	5.9995	By MS/MS	By MS/MS	By MS/MS	By matching		By MS/MS	11.5	11.5	18.6	11.5	0	11.5
P0AE52	P0AE52	8	8	8	Putative peroxiredoxin bcp	bcp	sp|P0AE52|BCP_ECOLI Peroxiredoxin Bcp OS=Escherichia coli (strain K12) OX=83333 GN=bcp PE=1 SV=1	1	8	8	8	4	6	3	5	7	6	4	6	3	5	7	6	4	6	3	5	7	6	61.5	61.5	61.5	17.634	156	156	0	151.05	By MS/MS	By MS/MS	By MS/MS	By MS/MS	By MS/MS	By MS/MS	26.9	44.2	20.5	35.9	53.2	44.2
P0AE70	P0AE70	3	3	3	mRNA interferase MazF	mazF	sp|P0AE70|MAZF_ECOLI Endoribonuclease toxin MazF OS=Escherichia coli (strain K12) OX=83333 GN=mazF PE=1 SV=1	1	3	3	3	2	2	2	2	1	2	2	2	2	2	1	2	2	2	2	2	1	2	35.1	35.1	35.1	12.098	111	111	0	6.8368	By MS/MS	By MS/MS	By MS/MS	By MS/MS	By MS/MS	By matching	19.8	24.3	19.8	19.8	9	19.8
P0AE78	P0AE78	7	7	7	Magnesium and cobalt efflux protein CorC	corC	sp|P0AE78|CORC_ECOLI Magnesium and cobalt efflux protein CorC OS=Escherichia coli (strain K12) OX=83333 GN=corC PE=1 SV=1	1	7	7	7	2	0	2	6	6	4	2	0	2	6	6	4	2	0	2	6	6	4	22.3	22.3	22.3	33.298	292	292	0	29.446	By matching		By matching	By MS/MS	By MS/MS	By MS/MS	5.8	0	5.8	21.2	19.9	14.7
P0AE82	P0AE82	4	4	4	Sensor protein CpxA	cpxA	sp|P0AE82|CPXA_ECOLI Sensor histidine kinase CpxA OS=Escherichia coli (strain K12) OX=83333 GN=cpxA PE=1 SV=1	1	4	4	4	0	0	0	2	0	2	0	0	0	2	0	2	0	0	0	2	0	2	8.5	8.5	8.5	51.624	457	457	0	9.2621				By MS/MS		By MS/MS	0	0	0	4.6	0	3.9
P0AE85	P0AE85	1	1	1	Periplasmic protein CpxP	cpxP	sp|P0AE85|CPXP_ECOLI Periplasmic protein CpxP OS=Escherichia coli (strain K12) OX=83333 GN=cpxP PE=1 SV=1	1	1	1	1	0	0	1	0	1	1	0	0	1	0	1	1	0	0	1	0	1	1	7.8	7.8	7.8	18.965	166	166	0.0060525	2.845			By matching		By MS/MS	By MS/MS	0	0	7.8	0	7.8	7.8
P0AE88	P0AE88	3	3	3	Transcriptional regulatory protein CpxR	cpxR	sp|P0AE88|CPXR_ECOLI Transcriptional regulatory protein CpxR OS=Escherichia coli (strain K12) OX=83333 GN=cpxR PE=1 SV=1	1	3	3	3	0	0	1	2	3	3	0	0	1	2	3	3	0	0	1	2	3	3	16.8	16.8	16.8	26.312	232	232	0	14.714			By matching	By MS/MS	By MS/MS	By MS/MS	0	0	6	12.5	16.8	16.8
P0AE91	P0AE91	2	2	2	Protein CreA	creA	sp|P0AE91|CREA_ECOLI Protein CreA OS=Escherichia coli (strain K12) OX=83333 GN=creA PE=3 SV=1	1	2	2	2	1	0	1	1	0	2	1	0	1	1	0	2	1	0	1	1	0	2	15.3	15.3	15.3	17.108	157	157	0	5.835	By matching		By matching	By MS/MS		By MS/MS	7.6	0	7.6	7.6	0	15.3
P0AEA8	P0AEA8	14	14	14	Siroheme synthase;Uroporphyrinogen-III C-methyltransferase;Precorrin-2 dehydrogenase;Sirohydrochlorin ferrochelatase	cysG	sp|P0AEA8|CYSG_ECOLI Siroheme synthase OS=Escherichia coli (strain K12) OX=83333 GN=cysG PE=1 SV=1	1	14	14	14	2	2	1	10	12	11	2	2	1	10	12	11	2	2	1	10	12	11	42.7	42.7	42.7	49.951	457	457	0	135.37	By matching	By matching	By matching	By MS/MS	By MS/MS	By MS/MS	4.6	4.4	2.4	30.6	37.2	34.8
P0AEB2	P0AEB2	12	12	12	D-alanyl-D-alanine carboxypeptidase DacA	dacA	sp|P0AEB2|DACA_ECOLI D-alanyl-D-alanine carboxypeptidase DacA OS=Escherichia coli (strain K12) OX=83333 GN=dacA PE=1 SV=1	1	12	12	12	4	7	9	10	8	9	4	7	9	10	8	9	4	7	9	10	8	9	39	39	39	44.443	403	403	0	69.279	By MS/MS	By MS/MS	By MS/MS	By MS/MS	By MS/MS	By MS/MS	8.9	21.8	27.5	31.5	23.8	31.8
P0AEB7	P0AEB7	1	1	1	RutC family protein YoaB	yoaB	sp|P0AEB7|YOAB_ECOLI RutC family protein YoaB OS=Escherichia coli (strain K12) OX=83333 GN=yoaB PE=3 SV=1	1	1	1	1	1	1	1	0	1	0	1	1	1	0	1	0	1	1	1	0	1	0	11.4	11.4	11.4	12.493	114	114	0	4.5022	By MS/MS	By MS/MS	By MS/MS		By MS/MS		11.4	11.4	11.4	0	11.4	0
P0AEC0	P0AEC0	2	2	2	UPF0053 inner membrane protein YoaE	yoaE	sp|P0AEC0|YOAE_ECOLI UPF0053 inner membrane protein YoaE OS=Escherichia coli (strain K12) OX=83333 GN=yoaE PE=1 SV=1	1	2	2	2	0	0	0	1	1	2	0	0	0	1	1	2	0	0	0	1	1	2	5.2	5.2	5.2	56.527	518	518	0	6.6582				By matching	By MS/MS	By MS/MS	0	0	0	2.1	3.1	5.2
P0AEC3	P0AEC3	12	12	12	Aerobic respiration control sensor protein ArcB	arcB	sp|P0AEC3|ARCB_ECOLI Aerobic respiration control sensor protein ArcB OS=Escherichia coli (strain K12) OX=83333 GN=arcB PE=1 SV=1	1	12	12	12	0	3	2	6	6	11	0	3	2	6	6	11	0	3	2	6	6	11	21.7	21.7	21.7	87.982	778	778	0	45.122		By matching	By matching	By MS/MS	By MS/MS	By MS/MS	0	4.8	3.2	9.3	12.2	20.2
P0AEC5	P0AEC5	4	4	4	Signal transduction histidine-protein kinase BarA	barA	sp|P0AEC5|BARA_ECOLI Signal transduction histidine-protein kinase BarA OS=Escherichia coli (strain K12) OX=83333 GN=barA PE=1 SV=1	1	4	4	4	0	0	1	2	3	2	0	0	1	2	3	2	0	0	1	2	3	2	5.3	5.3	5.3	102.45	918	918	0	10.784			By matching	By MS/MS	By MS/MS	By MS/MS	0	0	0.9	2.9	4.5	2.1
P0AED0	P0AED0	4	4	4	Universal stress protein A	uspA	sp|P0AED0|USPA_ECOLI Universal stress protein A OS=Escherichia coli (strain K12) OX=83333 GN=uspA PE=1 SV=2	1	4	4	4	2	1	3	3	4	3	2	1	3	3	4	3	2	1	3	3	4	3	61.8	61.8	61.8	16.066	144	144	0	61.092	By MS/MS	By MS/MS	By MS/MS	By MS/MS	By MS/MS	By MS/MS	22.9	9	50	50	61.8	50
P0AED7	P0AED7	3	3	3	Succinyl-diaminopimelate desuccinylase	dapE	sp|P0AED7|DAPE_ECOLI Succinyl-diaminopimelate desuccinylase OS=Escherichia coli (strain K12) OX=83333 GN=dapE PE=1 SV=1	1	3	3	3	2	0	0	2	2	1	2	0	0	2	2	1	2	0	0	2	2	1	12.3	12.3	12.3	41.269	375	375	0	4.9169	By MS/MS			By MS/MS	By MS/MS	By matching	6.9	0	0	6.9	7.7	5.3
P0AEE1	P0AEE1	8	8	8	Protein DcrB	dcrB	sp|P0AEE1|DCRB_ECOLI Inner membrane lipoprotein DcrB OS=Escherichia coli (strain K12) OX=83333 GN=dcrB PE=1 SV=1	1	8	8	8	6	4	3	6	6	7	6	4	3	6	6	7	6	4	3	6	6	7	53	53	53	19.787	185	185	0	38.705	By MS/MS	By MS/MS	By MS/MS	By MS/MS	By MS/MS	By MS/MS	38.9	28.1	18.4	44.9	44.9	44.9
P0AEE5	P0AEE5	14	14	14	D-galactose-binding periplasmic protein	mglB	sp|P0AEE5|DGAL_ECOLI D-galactose-binding periplasmic protein OS=Escherichia coli (strain K12) OX=83333 GN=mglB PE=1 SV=1	1	14	14	14	11	9	7	12	13	9	11	9	7	12	13	9	11	9	7	12	13	9	55.4	55.4	55.4	35.712	332	332	0	89.308	By MS/MS	By MS/MS	By MS/MS	By MS/MS	By MS/MS	By MS/MS	41.9	37	26.8	46.7	50.3	35.2
P0AEG4	P0AEG4	10	10	10	Thiol:disulfide interchange protein DsbA	dsbA	sp|P0AEG4|DSBA_ECOLI Thiol:disulfide interchange protein DsbA OS=Escherichia coli (strain K12) OX=83333 GN=dsbA PE=1 SV=1	1	10	10	10	7	2	5	10	10	10	7	2	5	10	10	10	7	2	5	10	10	10	58.2	58.2	58.2	23.104	208	208	0	207.18	By MS/MS	By MS/MS	By MS/MS	By MS/MS	By MS/MS	By MS/MS	40.9	10.6	25	58.2	58.2	58.2
P0AEG6	P0AEG6	6	6	6	Thiol:disulfide interchange protein DsbC	dsbC	sp|P0AEG6|DSBC_ECOLI Thiol:disulfide interchange protein DsbC OS=Escherichia coli (strain K12) OX=83333 GN=dsbC PE=1 SV=1	1	6	6	6	1	0	1	5	2	6	1	0	1	5	2	6	1	0	1	5	2	6	31.4	31.4	31.4	25.621	236	236	0	21.872	By MS/MS		By matching	By MS/MS	By MS/MS	By MS/MS	3	0	3.4	28	9.3	31.4
P0AEH1	P0AEH1	4	4	4	Regulator of sigma-E protease RseP	rseP	sp|P0AEH1|RSEP_ECOLI Regulator of sigma-E protease RseP OS=Escherichia coli (strain K12) OX=83333 GN=rseP PE=1 SV=1	1	4	4	4	2	0	1	3	3	2	2	0	1	3	3	2	2	0	1	3	3	2	10.7	10.7	10.7	49.071	450	450	0	5.2028	By matching		By matching	By MS/MS	By MS/MS	By MS/MS	3.8	0	2.7	8	8	4.7
P0AEH3	P0AEH3	1	1	1	Protein ElaA	elaA	sp|P0AEH3|ELAA_ECOLI Protein ElaA OS=Escherichia coli (strain K12) OX=83333 GN=elaA PE=1 SV=1	1	1	1	1	1	0	0	1	1	0	1	0	0	1	1	0	1	0	0	1	1	0	7.8	7.8	7.8	17.419	153	153	0	8.9591	By matching			By MS/MS	By MS/MS		7.8	0	0	7.8	7.8	0
P0AEH5	P0AEH5	2	2	2	Protein ElaB	elaB	sp|P0AEH5|ELAB_ECOLI Protein ElaB OS=Escherichia coli (strain K12) OX=83333 GN=elaB PE=1 SV=1	1	2	2	2	0	1	1	0	2	1	0	1	1	0	2	1	0	1	1	0	2	1	27.7	27.7	27.7	11.306	101	101	0	70.154		By matching	By MS/MS		By MS/MS	By MS/MS	0	10.9	16.8	0	27.7	16.8
P0AEI1	P0AEI1	25	25	25	tRNA-2-methylthio-N(6)-dimethylallyladenosine synthase	miaB	sp|P0AEI1|MIAB_ECOLI tRNA-2-methylthio-N(6)-dimethylallyladenosine synthase OS=Escherichia coli (strain K12) OX=83333 GN=miaB PE=1 SV=1	1	25	25	25	15	16	17	21	24	22	15	16	17	21	24	22	15	16	17	21	24	22	72.8	72.8	72.8	53.662	474	474	0	323.31	By MS/MS	By MS/MS	By MS/MS	By MS/MS	By MS/MS	By MS/MS	47	45.1	50.2	62.7	70.5	66.5
P0AEI4	P0AEI4	16	16	16	Ribosomal protein S12 methylthiotransferase RimO	rimO	sp|P0AEI4|RIMO_ECOLI Ribosomal protein S12 methylthiotransferase RimO OS=Escherichia coli (strain K12) OX=83333 GN=rimO PE=1 SV=1	1	16	16	16	7	6	6	11	11	13	7	6	6	11	11	13	7	6	6	11	11	13	43.1	43.1	43.1	49.581	441	441	0	98.693	By MS/MS	By MS/MS	By MS/MS	By MS/MS	By MS/MS	By MS/MS	17	13.8	15.6	29.3	32	35.4
P0AEJ2	P0AEJ2	5	5	5	Isochorismate synthase EntC	entC	sp|P0AEJ2|ENTC_ECOLI Isochorismate synthase EntC OS=Escherichia coli (strain K12) OX=83333 GN=entC PE=1 SV=1	1	5	5	5	0	1	0	1	3	3	0	1	0	1	3	3	0	1	0	1	3	3	22.5	22.5	22.5	42.931	391	391	0	16.858		By MS/MS		By MS/MS	By MS/MS	By MS/MS	0	2.8	0	4.6	14.6	12.5
P0AEJ6	P0AEJ6	1	1	1	Ethanolamine ammonia-lyase heavy chain	eutB	sp|P0AEJ6|EUTB_ECOLI Ethanolamine ammonia-lyase large subunit OS=Escherichia coli (strain K12) OX=83333 GN=eutB PE=1 SV=1	1	1	1	1	0	0	0	0	1	0	0	0	0	0	1	0	0	0	0	0	1	0	3.8	3.8	3.8	49.403	453	453	0.0034317	3.0658					By MS/MS		0	0	0	0	3.8	0
P0AEK2	P0AEK2	9	9	9	3-oxoacyl-[acyl-carrier-protein] reductase FabG	fabG	sp|P0AEK2|FABG_ECOLI 3-oxoacyl-[acyl-carrier-protein] reductase FabG OS=Escherichia coli (strain K12) OX=83333 GN=fabG PE=1 SV=1	1	9	9	9	8	8	6	9	9	8	8	8	6	9	9	8	8	8	6	9	9	8	59.4	59.4	59.4	25.56	244	244	0	323.31	By MS/MS	By MS/MS	By MS/MS	By MS/MS	By MS/MS	By MS/MS	52.5	52.5	41.4	59.4	59.4	55.7
P0AEK4	P0AEK4	12	12	12	Enoyl-[acyl-carrier-protein] reductase [NADH] FabI	fabI	sp|P0AEK4|FABI_ECOLI Enoyl-[acyl-carrier-protein] reductase [NADH] FabI OS=Escherichia coli (strain K12) OX=83333 GN=fabI PE=1 SV=2	1	12	12	12	11	9	9	11	10	11	11	9	9	11	10	11	11	9	9	11	10	11	57.3	57.3	57.3	27.864	262	262	0	323.31	By MS/MS	By MS/MS	By MS/MS	By MS/MS	By MS/MS	By MS/MS	52.7	48.9	49.2	52.7	52.3	56.9
P0AEL0	P0AEL0	1	1	1	Formate dehydrogenase, cytochrome b556(fdo) subunit	fdoI	sp|P0AEL0|FDOI_ECOLI Formate dehydrogenase, cytochrome b556(fdo) subunit OS=Escherichia coli (strain K12) OX=83333 GN=fdoI PE=1 SV=1	1	1	1	1	1	1	0	0	0	0	1	1	0	0	0	0	1	1	0	0	0	0	5.7	5.7	5.7	24.606	211	211	0	4.5833	By MS/MS	By MS/MS					5.7	5.7	0	0	0	0
P0AEM0	P0AEM0	2	2	2	FKBP-type 16 kDa peptidyl-prolyl cis-trans isomerase	fkpB	sp|P0AEM0|FKBX_ECOLI FKBP-type 16 kDa peptidyl-prolyl cis-trans isomerase OS=Escherichia coli (strain K12) OX=83333 GN=fkpB PE=1 SV=2	1	2	2	2	1	1	0	1	2	1	1	1	0	1	2	1	1	1	0	1	2	1	19.5	19.5	19.5	16.081	149	149	0	14.121	By matching	By matching		By MS/MS	By MS/MS	By MS/MS	7.4	7.4	0	7.4	19.5	7.4
P0AEM9	P0AEM9	5	5	5	Cystine-binding periplasmic protein	fliY	sp|P0AEM9|TCYJ_ECOLI L-cystine-binding protein TcyJ OS=Escherichia coli (strain K12) OX=83333 GN=tcyJ PE=1 SV=1	1	5	5	5	3	3	4	1	2	2	3	3	4	1	2	2	3	3	4	1	2	2	20.3	20.3	20.3	29.039	266	266	0	13.617	By MS/MS	By MS/MS	By MS/MS	By MS/MS	By MS/MS	By MS/MS	11.3	13.5	16.5	3.8	10.5	8.3
P0AEN1	P0AEN1	6	6	6	NAD(P)H-flavin reductase	fre	sp|P0AEN1|FRE_ECOLI NAD(P)H-flavin reductase OS=Escherichia coli (strain K12) OX=83333 GN=fre PE=1 SV=2	1	6	6	6	3	1	1	4	5	5	3	1	1	4	5	5	3	1	1	4	5	5	33.5	33.5	33.5	26.242	233	233	0	35.089	By MS/MS	By MS/MS	By matching	By MS/MS	By MS/MS	By MS/MS	16.7	5.6	5.6	24.5	29.6	28.3
P0AEP3	P0AEP3	12	12	12	UTP--glucose-1-phosphate uridylyltransferase	galU	sp|P0AEP3|GALU_ECOLI UTP--glucose-1-phosphate uridylyltransferase OS=Escherichia coli (strain K12) OX=83333 GN=galU PE=1 SV=2	1	12	12	12	7	7	6	11	11	12	7	7	6	11	11	12	7	7	6	11	11	12	55	55	55	32.942	302	302	0	309.52	By MS/MS	By MS/MS	By MS/MS	By MS/MS	By MS/MS	By MS/MS	32.1	31.8	25.5	50.7	55	55
P0AEQ3	P0AEQ3	5	5	5	Glutamine-binding periplasmic protein	glnH	sp|P0AEQ3|GLNH_ECOLI Glutamine-binding periplasmic protein OS=Escherichia coli (strain K12) OX=83333 GN=glnH PE=1 SV=1	1	5	5	5	2	0	2	4	4	4	2	0	2	4	4	4	2	0	2	4	4	4	31.5	31.5	31.5	27.19	248	248	0	23.8	By MS/MS		By matching	By MS/MS	By MS/MS	By MS/MS	12.5	0	14.5	27.4	24.6	27.4
P0AEQ6	P0AEQ6	3	3	3	Glutamine transport system permease protein GlnP	glnP	sp|P0AEQ6|GLNP_ECOLI Glutamine transport system permease protein GlnP OS=Escherichia coli (strain K12) OX=83333 GN=glnP PE=1 SV=1	1	3	3	3	3	2	1	1	3	2	3	2	1	1	3	2	3	2	1	1	3	2	13.7	13.7	13.7	24.364	219	219	0	12.331	By MS/MS	By MS/MS	By MS/MS	By matching	By MS/MS	By MS/MS	13.7	9.6	5	4.1	13.7	8.7
P0AER0	P0AER0	1	1	1	Glycerol uptake facilitator protein	glpF	sp|P0AER0|GLPF_ECOLI Glycerol uptake facilitator protein OS=Escherichia coli (strain K12) OX=83333 GN=glpF PE=1 SV=1	1	1	1	1	1	0	1	1	1	1	1	0	1	1	1	1	1	0	1	1	1	1	4.3	4.3	4.3	29.78	281	281	0	9.8944	By matching		By matching	By MS/MS	By MS/MS	By MS/MS	4.3	0	4.3	4.3	4.3	4.3
P0AES0	P0AES0	1	1	1	Bifunctional glutathionylspermidine synthetase/amidase;Glutathionylspermidine amidase;Glutathionylspermidine synthetase	gss	sp|P0AES0|GSP_ECOLI Bifunctional glutathionylspermidine synthetase/amidase OS=Escherichia coli (strain K12) OX=83333 GN=gss PE=1 SV=1	1	1	1	1	0	0	0	0	0	1	0	0	0	0	0	1	0	0	0	0	0	1	3.1	3.1	3.1	70.531	619	619	0	5.9808						By MS/MS	0	0	0	0	0	3.1
P0AES2	P0AES2	4	4	4	Glucarate dehydratase	gudD	sp|P0AES2|GUDD_ECOLI Glucarate dehydratase OS=Escherichia coli (strain K12) OX=83333 GN=gudD PE=1 SV=2	1	4	4	4	0	0	0	2	4	1	0	0	0	2	4	1	0	0	0	2	4	1	13.9	13.9	13.9	49.14	446	446	0	16.09				By MS/MS	By MS/MS	By matching	0	0	0	7	13.9	4.3
P0AES4	P0AES4	32	32	32	DNA gyrase subunit A	gyrA	sp|P0AES4|GYRA_ECOLI DNA gyrase subunit A OS=Escherichia coli (strain K12) OX=83333 GN=gyrA PE=1 SV=1	1	32	32	32	17	15	16	26	28	24	17	15	16	26	28	24	17	15	16	26	28	24	44.3	44.3	44.3	96.962	875	875	0	323.31	By MS/MS	By MS/MS	By MS/MS	By MS/MS	By MS/MS	By MS/MS	22.2	20.3	21.8	37.3	39.2	36.6
P0AES6	P0AES6	35	35	35	DNA gyrase subunit B	gyrB	sp|P0AES6|GYRB_ECOLI DNA gyrase subunit B OS=Escherichia coli (strain K12) OX=83333 GN=gyrB PE=1 SV=2	1	35	35	35	19	15	13	32	33	32	19	15	13	32	33	32	19	15	13	32	33	32	60.8	60.8	60.8	89.949	804	804	0	323.31	By MS/MS	By MS/MS	By MS/MS	By MS/MS	By MS/MS	By MS/MS	27.2	25.5	16.4	58.2	58.8	57.1
P0AET8	P0AET8	4	4	4	7-alpha-hydroxysteroid dehydrogenase	hdhA	sp|P0AET8|HDHA_ECOLI 7alpha-hydroxysteroid dehydrogenase OS=Escherichia coli (strain K12) OX=83333 GN=hdhA PE=1 SV=1	1	4	4	4	0	0	1	2	4	4	0	0	1	2	4	4	0	0	1	2	4	4	20.4	20.4	20.4	26.778	255	255	0	8.3145			By matching	By matching	By MS/MS	By MS/MS	0	0	5.1	9.4	20.4	20.4
P0AEU7	P0AEU7	6	6	6	Chaperone protein Skp	skp	sp|P0AEU7|SKP_ECOLI Chaperone protein Skp OS=Escherichia coli (strain K12) OX=83333 GN=skp PE=1 SV=1	1	6	6	6	5	2	5	6	6	6	5	2	5	6	6	6	5	2	5	6	6	6	47.8	47.8	47.8	17.688	161	161	0	95.851	By MS/MS	By MS/MS	By MS/MS	By MS/MS	By MS/MS	By MS/MS	32.3	14.9	32.3	47.8	47.8	47.8
P0AEV9	P0AEV9	1	1	1	Hydrogenase 3 maturation protease	hycI	sp|P0AEV9|HYCI_ECOLI Hydrogenase 3 maturation protease OS=Escherichia coli (strain K12) OX=83333 GN=hycI PE=1 SV=2	1	1	1	1	0	0	0	0	0	1	0	0	0	0	0	1	0	0	0	0	0	1	5.8	5.8	5.8	17.056	156	156	0.0066445	2.6539						By MS/MS	0	0	0	0	0	5.8
P0AEW6	P0AEW6	9	9	9	Inosine-guanosine kinase	gsk	sp|P0AEW6|INGK_ECOLI Guanosine-inosine kinase OS=Escherichia coli (strain K12) OX=83333 GN=gsk PE=1 SV=1	1	9	9	9	4	3	1	7	8	8	4	3	1	7	8	8	4	3	1	7	8	8	27.6	27.6	27.6	48.448	434	434	0	52.165	By MS/MS	By MS/MS	By matching	By MS/MS	By MS/MS	By MS/MS	10.6	7.1	2.8	20.5	25.1	23
P0AEW9	P0AEW9	12	12	12	1-phosphofructokinase	fruK	sp|P0AEW9|K1PF_ECOLI 1-phosphofructokinase OS=Escherichia coli (strain K12) OX=83333 GN=fruK PE=1 SV=1	1	12	12	12	5	4	6	12	11	11	5	4	6	12	11	11	5	4	6	12	11	11	52.9	52.9	52.9	33.755	312	312	0	323.31	By MS/MS	By MS/MS	By MS/MS	By MS/MS	By MS/MS	By MS/MS	19.9	19.9	23.1	52.9	50.6	43.6
P0AEX3	P0AEX3	3	3	3	Alpha-ketoglutarate permease	kgtP	sp|P0AEX3|KGTP_ECOLI Alpha-ketoglutarate permease OS=Escherichia coli (strain K12) OX=83333 GN=kgtP PE=1 SV=1	1	3	3	3	1	1	1	1	3	2	1	1	1	1	3	2	1	1	1	1	3	2	6.7	6.7	6.7	47.052	432	432	0	9.2085	By matching	By MS/MS	By matching	By MS/MS	By MS/MS	By MS/MS	2.5	2.1	2.5	2.5	6.7	4.6
P0AEX9	P0AEX9	19	19	19	Maltose-binding periplasmic protein	malE	sp|P0AEX9|MALE_ECOLI Maltose/maltodextrin-binding periplasmic protein OS=Escherichia coli (strain K12) OX=83333 GN=malE PE=1 SV=1	1	19	19	19	13	11	16	14	15	15	13	11	16	14	15	15	13	11	16	14	15	15	61.1	61.1	61.1	43.387	396	396	0	180.9	By MS/MS	By MS/MS	By MS/MS	By MS/MS	By MS/MS	By MS/MS	43.2	36.6	54	50	46	49
P0AEZ3	P0AEZ3	14	14	14	Septum site-determining protein MinD	minD	sp|P0AEZ3|MIND_ECOLI Septum site-determining protein MinD OS=Escherichia coli (strain K12) OX=83333 GN=minD PE=1 SV=2	1	14	14	14	7	3	4	13	11	12	7	3	4	13	11	12	7	3	4	13	11	12	57.4	57.4	57.4	29.614	270	270	0	180.41	By MS/MS	By MS/MS	By MS/MS	By MS/MS	By MS/MS	By MS/MS	24.1	10.7	15.9	53.3	50	50
P0AEZ9	P0AEZ9	6	6	6	Molybdenum cofactor biosynthesis protein B	moaB	sp|P0AEZ9|MOAB_ECOLI Molybdenum cofactor biosynthesis protein B OS=Escherichia coli (strain K12) OX=83333 GN=moaB PE=1 SV=2	1	6	6	6	5	3	5	5	5	6	5	3	5	5	5	6	5	3	5	5	5	6	41.8	41.8	41.8	18.665	170	170	0	22.6	By MS/MS	By MS/MS	By MS/MS	By MS/MS	By MS/MS	By MS/MS	34.7	19.4	32.9	35.3	35.3	41.8
P0AF03	P0AF03	2	2	2	Molybdopterin adenylyltransferase	mog	sp|P0AF03|MOG_ECOLI Molybdopterin adenylyltransferase OS=Escherichia coli (strain K12) OX=83333 GN=mog PE=1 SV=1	1	2	2	2	1	2	1	1	1	0	1	2	1	1	1	0	1	2	1	1	1	0	11.3	11.3	11.3	21.222	195	195	0	7.3603	By MS/MS	By MS/MS	By MS/MS	By MS/MS	By MS/MS		4.6	11.3	4.6	4.6	6.7	0
P0AF08	P0AF08	7	7	7	Protein mrp	mrp	sp|P0AF08|APBC_ECOLI Iron-sulfur cluster carrier protein OS=Escherichia coli (strain K12) OX=83333 GN=mrp PE=3 SV=1	1	7	7	7	5	4	3	6	7	7	5	4	3	6	7	7	5	4	3	6	7	7	25.7	25.7	25.7	39.938	369	369	0	74.075	By MS/MS	By MS/MS	By MS/MS	By MS/MS	By MS/MS	By MS/MS	18.2	14.4	11.9	20.6	25.7	25.7
P0AF12	P0AF12	6	6	6	5-methylthioadenosine/S-adenosylhomocysteine nucleosidase	mtnN	sp|P0AF12|MTNN_ECOLI 5-methylthioadenosine/S-adenosylhomocysteine nucleosidase OS=Escherichia coli (strain K12) OX=83333 GN=mtnN PE=1 SV=1	1	6	6	6	1	2	0	6	4	5	1	2	0	6	4	5	1	2	0	6	4	5	44.4	44.4	44.4	24.354	232	232	0	104.5	By matching	By MS/MS		By MS/MS	By MS/MS	By MS/MS	4.7	14.7	0	44.4	33.2	37.9
P0AF18	P0AF18	6	6	6	N-acetylglucosamine-6-phosphate deacetylase	nagA	sp|P0AF18|NAGA_ECOLI N-acetylglucosamine-6-phosphate deacetylase OS=Escherichia coli (strain K12) OX=83333 GN=nagA PE=1 SV=1	1	6	6	6	2	4	1	3	5	3	2	4	1	3	5	3	2	4	1	3	5	3	24.6	24.6	24.6	40.949	382	382	0	25.589	By MS/MS	By MS/MS	By matching	By MS/MS	By MS/MS	By MS/MS	8.1	14.9	5	12.8	19.6	12.8
P0AF20	P0AF20	13	13	13	N-acetylglucosamine repressor	nagC	sp|P0AF20|NAGC_ECOLI N-acetylglucosamine repressor OS=Escherichia coli (strain K12) OX=83333 GN=nagC PE=2 SV=1	1	13	13	13	3	3	4	8	11	6	3	3	4	8	11	6	3	3	4	8	11	6	43.3	43.3	43.3	44.541	406	406	0	114.31	By MS/MS	By MS/MS	By matching	By MS/MS	By MS/MS	By MS/MS	8.6	9.4	11.1	23.6	36.7	18.7
P0AF24	P0AF24	5	5	5	Ribonucleotide monophosphatase NagD	nagD	sp|P0AF24|NAGD_ECOLI Ribonucleotide monophosphatase NagD OS=Escherichia coli (strain K12) OX=83333 GN=nagD PE=1 SV=1	1	5	5	5	3	2	2	5	5	4	3	2	2	5	5	4	3	2	2	5	5	4	29.2	29.2	29.2	27.163	250	250	0	86.514	By MS/MS	By MS/MS	By matching	By MS/MS	By MS/MS	By MS/MS	20.4	16	16	29.2	29.2	24.8
P0AF26	P0AF26	3	3	3	Nitrate reductase molybdenum cofactor assembly chaperone NarJ	narJ	sp|P0AF26|NARJ_ECOLI Nitrate reductase molybdenum cofactor assembly chaperone NarJ OS=Escherichia coli (strain K12) OX=83333 GN=narJ PE=1 SV=1	1	3	3	3	0	0	0	2	3	2	0	0	0	2	3	2	0	0	0	2	3	2	23.3	23.3	23.3	26.449	236	236	0	17.556				By MS/MS	By MS/MS	By MS/MS	0	0	0	18.2	23.3	16.1
P0AF28	P0AF28	7	7	7	Nitrate/nitrite response regulator protein NarL	narL	sp|P0AF28|NARL_ECOLI Nitrate/nitrite response regulator protein NarL OS=Escherichia coli (strain K12) OX=83333 GN=narL PE=1 SV=1	1	7	7	7	1	1	1	1	5	4	1	1	1	1	5	4	1	1	1	1	5	4	37.5	37.5	37.5	23.927	216	216	0	18.472	By matching	By matching	By matching	By MS/MS	By MS/MS	By MS/MS	4.2	4.2	4.2	4.2	32.4	13.9
P0AF36	P0AF36	3	3	3	Cell division protein ZapB	zapB	sp|P0AF36|ZAPB_ECOLI Cell division protein ZapB OS=Escherichia coli (strain K12) OX=83333 GN=zapB PE=1 SV=1	1	3	3	3	1	1	1	3	0	2	1	1	1	3	0	2	1	1	1	3	0	2	53.1	53.1	53.1	9.6347	81	81	0	21.846	By matching	By matching	By matching	By MS/MS		By MS/MS	11.1	11.1	11.1	53.1	0	29.6
P0AF50	P0AF50	2	2	2	Uncharacterized protein YjbR	yjbR	sp|P0AF50|YJBR_ECOLI Uncharacterized protein YjbR OS=Escherichia coli (strain K12) OX=83333 GN=yjbR PE=1 SV=1	1	2	2	2	2	0	0	2	0	1	2	0	0	2	0	1	2	0	0	2	0	1	17.8	17.8	17.8	13.519	118	118	0	5.0798	By MS/MS			By MS/MS		By MS/MS	17.8	0	0	17.8	0	8.5
P0AF67	P0AF67	1	1	1	tRNA threonylcarbamoyladenosine biosynthesis protein TsaE	tsaE	sp|P0AF67|TSAE_ECOLI tRNA threonylcarbamoyladenosine biosynthesis protein TsaE OS=Escherichia coli (strain K12) OX=83333 GN=tsaE PE=1 SV=1	1	1	1	1	0	0	0	0	1	1	0	0	0	0	1	1	0	0	0	0	1	1	10.5	10.5	10.5	16.853	153	153	0.0021216	3.4878					By MS/MS	By matching	0	0	0	0	10.5	10.5
P0AF70	P0AF70	1	1	1	Uncharacterized protein YjeI	yjeI	sp|P0AF70|YJEI_ECOLI Uncharacterized protein YjeI OS=Escherichia coli (strain K12) OX=83333 GN=yjeI PE=3 SV=1	1	1	1	1	1	0	1	1	1	1	1	0	1	1	1	1	1	0	1	1	1	1	16.2	16.2	16.2	11.958	117	117	0	19.073	By MS/MS		By MS/MS	By MS/MS	By MS/MS	By MS/MS	16.2	0	16.2	16.2	16.2	16.2
P0AF90	P0AF90	2	2	2	Regulator of ribonuclease activity B	rraB	sp|P0AF90|RRAB_ECOLI Regulator of ribonuclease activity B OS=Escherichia coli (strain K12) OX=83333 GN=rraB PE=1 SV=1	1	2	2	2	1	0	0	1	0	1	1	0	0	1	0	1	1	0	0	1	0	1	10.1	10.1	10.1	15.603	138	138	0.0021112	3.4504	By matching			By MS/MS		By MS/MS	10.1	0	0	10.1	0	7.2
P0AF93	P0AF93	5	5	5	2-iminobutanoate/2-iminopropanoate deaminase	ridA	sp|P0AF93|RIDA_ECOLI 2-iminobutanoate/2-iminopropanoate deaminase OS=Escherichia coli (strain K12) OX=83333 GN=ridA PE=1 SV=2	1	5	5	5	4	5	5	4	4	3	4	5	5	4	4	3	4	5	5	4	4	3	70.3	70.3	70.3	13.611	128	128	0	88.726	By MS/MS	By MS/MS	By MS/MS	By MS/MS	By MS/MS	By MS/MS	64.8	70.3	70.3	64.8	64.8	44.5
P0AF96	P0AF96	5	5	5	Toxin-antitoxin biofilm protein TabA	tabA	sp|P0AF96|TABA_ECOLI Toxin-antitoxin biofilm protein TabA OS=Escherichia coli (strain K12) OX=83333 GN=tabA PE=1 SV=1	1	5	5	5	1	0	1	4	3	3	1	0	1	4	3	3	1	0	1	4	3	3	51.3	51.3	51.3	16.865	150	150	0	21.38	By matching		By matching	By MS/MS	By MS/MS	By MS/MS	8	0	8	38.7	31.3	26.7
P0AF98	P0AF98	4	4	4	Lipopolysaccharide export system permease protein LptF	lptF	sp|P0AF98|LPTF_ECOLI Lipopolysaccharide export system permease protein LptF OS=Escherichia coli (strain K12) OX=83333 GN=lptF PE=1 SV=1	1	4	4	4	3	0	2	4	3	2	3	0	2	4	3	2	3	0	2	4	3	2	10.1	10.1	10.1	40.357	366	366	0	11.386	By MS/MS		By matching	By MS/MS	By MS/MS	By MS/MS	7.7	0	4.9	10.1	7.4	4.9
P0AFA7	P0AFA7	3	3	3	Na(+)/H(+) antiporter NhaB	nhaB	sp|P0AFA7|NHAB_ECOLI Na(+)/H(+) antiporter NhaB OS=Escherichia coli (strain K12) OX=83333 GN=nhaB PE=1 SV=1	1	3	3	3	0	1	1	1	2	1	0	1	1	1	2	1	0	1	1	1	2	1	6.6	6.6	6.6	56.728	513	513	0	10.768		By MS/MS	By MS/MS	By matching	By MS/MS	By MS/MS	0	2.1	2.1	2.1	4.5	2.1
P0AFB8	P0AFB8	2	2	2	Nitrogen regulation protein NR(I)	glnG	sp|P0AFB8|NTRC_ECOLI DNA-binding transcriptional regulator NtrC OS=Escherichia coli (strain K12) OX=83333 GN=glnG PE=1 SV=1	1	2	2	2	0	0	0	1	1	2	0	0	0	1	1	2	0	0	0	1	1	2	5.3	5.3	5.3	52.254	469	469	0	5.1371				By matching	By MS/MS	By MS/MS	0	0	0	3.2	2.1	5.3
P0AFC0	P0AFC0	1	1	1	Dihydroneopterin triphosphate diphosphatase	nudB	sp|P0AFC0|NUDB_ECOLI Dihydroneopterin triphosphate diphosphatase OS=Escherichia coli (strain K12) OX=83333 GN=nudB PE=1 SV=1	1	1	1	1	1	1	1	1	1	0	1	1	1	1	1	0	1	1	1	1	1	0	7.3	7.3	7.3	17.306	150	150	0.0060811	2.9041	By MS/MS	By MS/MS	By MS/MS	By MS/MS	By MS/MS		7.3	7.3	7.3	7.3	7.3	0
P0AFC3	P0AFC3	3	3	3	NADH-quinone oxidoreductase subunit A	nuoA	sp|P0AFC3|NUOA_ECOLI NADH-quinone oxidoreductase subunit A OS=Escherichia coli (strain K12) OX=83333 GN=nuoA PE=1 SV=1	1	3	3	3	3	3	3	3	3	3	3	3	3	3	3	3	3	3	3	3	3	3	24.5	24.5	24.5	16.457	147	147	0	9.1059	By MS/MS	By MS/MS	By MS/MS	By MS/MS	By MS/MS	By MS/MS	24.5	24.5	24.5	24.5	24.5	24.5
P0AFC7	P0AFC7	5	5	5	NADH-quinone oxidoreductase subunit B	nuoB	sp|P0AFC7|NUOB_ECOLI NADH-quinone oxidoreductase subunit B OS=Escherichia coli (strain K12) OX=83333 GN=nuoB PE=1 SV=1	1	5	5	5	2	4	3	2	5	5	2	4	3	2	5	5	2	4	3	2	5	5	24.1	24.1	24.1	25.056	220	220	0	36.954	By MS/MS	By MS/MS	By MS/MS	By MS/MS	By MS/MS	By MS/MS	12.7	20	14.5	9.5	24.1	24.1
P0AFD1	P0AFD1	3	3	3	NADH-quinone oxidoreductase subunit E	nuoE	sp|P0AFD1|NUOE_ECOLI NADH-quinone oxidoreductase subunit E OS=Escherichia coli (strain K12) OX=83333 GN=nuoE PE=1 SV=1	1	3	3	3	3	2	3	2	3	2	3	2	3	2	3	2	3	2	3	2	3	2	19.3	19.3	19.3	18.59	166	166	0	8.679	By MS/MS	By MS/MS	By MS/MS	By matching	By MS/MS	By MS/MS	19.3	7.8	19.3	19.3	19.3	16.9
P0AFD4	P0AFD4	3	3	3	NADH-quinone oxidoreductase subunit H	nuoH	sp|P0AFD4|NUOH_ECOLI NADH-quinone oxidoreductase subunit H OS=Escherichia coli (strain K12) OX=83333 GN=nuoH PE=1 SV=1	1	3	3	3	2	2	2	2	2	3	2	2	2	2	2	3	2	2	2	2	2	3	10.2	10.2	10.2	36.219	325	325	0	13.501	By MS/MS	By MS/MS	By MS/MS	By MS/MS	By MS/MS	By MS/MS	7.1	7.1	7.1	7.1	5.5	10.2
P0AFD6	P0AFD6	6	6	6	NADH-quinone oxidoreductase subunit I	nuoI	sp|P0AFD6|NUOI_ECOLI NADH-quinone oxidoreductase subunit I OS=Escherichia coli (strain K12) OX=83333 GN=nuoI PE=1 SV=1	1	6	6	6	6	3	4	6	4	5	6	3	4	6	4	5	6	3	4	6	4	5	31.7	31.7	31.7	20.538	180	180	0	25.199	By MS/MS	By MS/MS	By MS/MS	By MS/MS	By MS/MS	By MS/MS	31.7	13.9	20	31.7	20	26.1
P0AFE4	P0AFE4	1	1	1	NADH-quinone oxidoreductase subunit K	nuoK	sp|P0AFE4|NUOK_ECOLI NADH-quinone oxidoreductase subunit K OS=Escherichia coli (strain K12) OX=83333 GN=nuoK PE=1 SV=1	1	1	1	1	1	1	0	0	1	1	1	1	0	0	1	1	1	1	0	0	1	1	12	12	12	10.845	100	100	0.0021413	3.6736	By MS/MS	By matching			By MS/MS	By matching	12	12	0	0	12	12
P0AFE8	P0AFE8	1	1	1	NADH-quinone oxidoreductase subunit M	nuoM	sp|P0AFE8|NUOM_ECOLI NADH-quinone oxidoreductase subunit M OS=Escherichia coli (strain K12) OX=83333 GN=nuoM PE=1 SV=1	1	1	1	1	1	1	1	1	1	1	1	1	1	1	1	1	1	1	1	1	1	1	1.6	1.6	1.6	56.524	509	509	0.0020964	3.3656	By MS/MS	By MS/MS	By MS/MS	By MS/MS	By MS/MS	By MS/MS	1.6	1.6	1.6	1.6	1.6	1.6
P0AFF2	P0AFF2	7	7	7	Nucleoside permease NupC	nupC	sp|P0AFF2|NUPC_ECOLI Nucleoside permease NupC OS=Escherichia coli (strain K12) OX=83333 GN=nupC PE=1 SV=1	1	7	7	7	5	3	3	3	5	5	5	3	3	3	5	5	5	3	3	3	5	5	19.8	19.8	19.8	43.475	400	400	0	38.26	By MS/MS	By MS/MS	By MS/MS	By MS/MS	By MS/MS	By MS/MS	12.2	10.5	8.2	6.8	12.2	12.2
P0AFF4	P0AFF4	1	1	1	Nucleoside permease NupG	nupG	sp|P0AFF4|NUPG_ECOLI Nucleoside permease NupG OS=Escherichia coli (strain K12) OX=83333 GN=nupG PE=1 SV=1	1	1	1	1	1	0	1	1	1	1	1	0	1	1	1	1	1	0	1	1	1	1	2.4	2.4	2.4	46.389	418	418	0	4.3286	By MS/MS		By MS/MS	By MS/MS	By MS/MS	By MS/MS	2.4	0	2.4	2.4	2.4	2.4
P0AFF6	P0AFF6	25	25	25	Transcription termination/antitermination protein NusA	nusA	sp|P0AFF6|NUSA_ECOLI Transcription termination/antitermination protein NusA OS=Escherichia coli (strain K12) OX=83333 GN=nusA PE=1 SV=1	1	25	25	25	17	10	13	25	22	22	17	10	13	25	22	22	17	10	13	25	22	22	74.1	74.1	74.1	54.87	495	495	0	323.31	By MS/MS	By MS/MS	By MS/MS	By MS/MS	By MS/MS	By MS/MS	48.5	31.3	37.2	74.1	64.2	68.5
P0AFG0	P0AFG0	14	14	14	Transcription termination/antitermination protein NusG	nusG	sp|P0AFG0|NUSG_ECOLI Transcription termination/antitermination protein NusG OS=Escherichia coli (strain K12) OX=83333 GN=nusG PE=1 SV=2	1	14	14	14	11	14	13	12	12	12	11	14	13	12	12	12	11	14	13	12	12	12	69.1	69.1	69.1	20.531	181	181	0	277.52	By MS/MS	By MS/MS	By MS/MS	By MS/MS	By MS/MS	By MS/MS	63	69.1	69.1	68.5	68.5	68.5
P0AFG3	P0AFG3	27	27	27	2-oxoglutarate dehydrogenase E1 component	sucA	sp|P0AFG3|ODO1_ECOLI 2-oxoglutarate dehydrogenase E1 component OS=Escherichia coli (strain K12) OX=83333 GN=sucA PE=1 SV=1	1	27	27	27	17	13	16	21	24	24	17	13	16	21	24	24	17	13	16	21	24	24	40.9	40.9	40.9	105.06	933	933	0	323.31	By MS/MS	By MS/MS	By MS/MS	By MS/MS	By MS/MS	By MS/MS	21.3	19.3	20.6	28.9	35.2	37.4
P0AFG6	P0AFG6	9	9	9	Dihydrolipoyllysine-residue succinyltransferase component of 2-oxoglutarate dehydrogenase complex	sucB	sp|P0AFG6|ODO2_ECOLI Dihydrolipoyllysine-residue succinyltransferase component of 2-oxoglutarate dehydrogenase complex OS=Escherichia coli (strain K12) OX=83333 GN=sucB PE=1 SV=2	1	9	9	9	7	6	9	8	9	9	7	6	9	8	9	9	7	6	9	8	9	9	28.6	28.6	28.6	44.011	405	405	0	161.87	By MS/MS	By MS/MS	By MS/MS	By MS/MS	By MS/MS	By MS/MS	21.7	15.8	28.6	25.7	28.6	28.6
P0AFG8	P0AFG8	50	50	50	Pyruvate dehydrogenase E1 component	aceE	sp|P0AFG8|ODP1_ECOLI Pyruvate dehydrogenase E1 component OS=Escherichia coli (strain K12) OX=83333 GN=aceE PE=1 SV=2	1	50	50	50	38	41	37	48	49	48	38	41	37	48	49	48	38	41	37	48	49	48	67.6	67.6	67.6	99.667	887	887	0	323.31	By MS/MS	By MS/MS	By MS/MS	By MS/MS	By MS/MS	By MS/MS	54.3	59.2	55.8	67.3	67.4	67.3
P0AFH8	P0AFH8	3	3	3	Osmotically-inducible protein Y	osmY	sp|P0AFH8|OSMY_ECOLI Osmotically-inducible protein Y OS=Escherichia coli (strain K12) OX=83333 GN=osmY PE=1 SV=1	1	3	3	3	1	2	0	1	1	1	1	2	0	1	1	1	1	2	0	1	1	1	22.9	22.9	22.9	21.073	201	201	0	5.4051	By MS/MS	By MS/MS		By MS/MS	By MS/MS	By MS/MS	6.5	11.9	0	6.5	10.9	6.5
P0AFI2	P0AFI2	17	17	17	DNA topoisomerase 4 subunit A	parC	sp|P0AFI2|PARC_ECOLI DNA topoisomerase 4 subunit A OS=Escherichia coli (strain K12) OX=83333 GN=parC PE=1 SV=1	1	17	17	17	6	2	7	15	13	14	6	2	7	15	13	14	6	2	7	15	13	14	34.3	34.3	34.3	83.83	752	752	0	195.85	By MS/MS	By matching	By MS/MS	By MS/MS	By MS/MS	By MS/MS	10.9	3.2	12.5	31.2	24.5	25.4
P0AFI7	P0AFI7	2	2	2	Pyridoxine/pyridoxamine 5-phosphate oxidase	pdxH	sp|P0AFI7|PDXH_ECOLI Pyridoxine/pyridoxamine 5-phosphate oxidase OS=Escherichia coli (strain K12) OX=83333 GN=pdxH PE=1 SV=2	1	2	2	2	1	0	2	1	2	2	1	0	2	1	2	2	1	0	2	1	2	2	12.8	12.8	12.8	25.545	218	218	0	8.5302	By matching		By matching	By MS/MS	By MS/MS	By MS/MS	5.5	0	12.8	5.5	12.8	12.8
P0AFI9	P0AFI9	1	1	1	Putative permease PerM	perM	sp|P0AFI9|PERM_ECOLI Putative permease PerM OS=Escherichia coli (strain K12) OX=83333 GN=perM PE=3 SV=1	1	1	1	1	0	1	1	0	1	1	0	1	1	0	1	1	0	1	1	0	1	1	4	4	4	39.194	353	353	0.0020994	3.3846		By MS/MS	By MS/MS		By MS/MS	By matching	0	4	4	0	4	4
P0AFJ1	P0AFJ1	2	2	2	Protein PhnA	phnA	sp|P0AFJ1|YJDM_ECOLI Protein YjdM OS=Escherichia coli (strain K12) OX=83333 GN=yjdM PE=3 SV=1	1	2	2	2	1	2	2	1	2	2	1	2	2	1	2	2	1	2	2	1	2	2	25.2	25.2	25.2	12.345	111	111	0	20.636	By matching	By MS/MS	By MS/MS	By matching	By MS/MS	By matching	9.9	25.2	25.2	9.9	25.2	25.2
P0AFJ7	P0AFJ7	6	6	6	Low-affinity inorganic phosphate transporter 1	pitA	sp|P0AFJ7|PITA_ECOLI Low-affinity inorganic phosphate transporter 1 OS=Escherichia coli (strain K12) OX=83333 GN=pitA PE=1 SV=1	1	6	6	6	5	3	5	5	6	6	5	3	5	5	6	6	5	3	5	5	6	6	18.2	18.2	18.2	53.388	499	499	0	27.724	By MS/MS	By MS/MS	By MS/MS	By MS/MS	By MS/MS	By MS/MS	16.2	6	11.2	16.2	18.2	18.2
P0AFK0	P0AFK0	20	20	20	Metalloprotease PmbA	pmbA	sp|P0AFK0|PMBA_ECOLI Metalloprotease PmbA OS=Escherichia coli (strain K12) OX=83333 GN=pmbA PE=1 SV=1	1	20	20	20	7	6	10	16	17	19	7	6	10	16	17	19	7	6	10	16	17	19	64.9	64.9	64.9	48.369	450	450	0	249.56	By MS/MS	By MS/MS	By MS/MS	By MS/MS	By MS/MS	By MS/MS	17.8	15.6	25.3	48	55.6	59.1
P0AFK6	P0AFK6	2	2	2	Spermidine/putrescine transport system permease protein PotC	potC	sp|P0AFK6|POTC_ECOLI Spermidine/putrescine transport system permease protein PotC OS=Escherichia coli (strain K12) OX=83333 GN=potC PE=3 SV=1	1	2	2	2	0	1	1	1	2	1	0	1	1	1	2	1	0	1	1	1	2	1	8.3	8.3	8.3	29.111	264	264	0	5.7536		By matching	By matching	By MS/MS	By MS/MS	By matching	0	4.2	4.2	4.2	8.3	4.2
P0AFK9	P0AFK9	12	12	12	Spermidine/putrescine-binding periplasmic protein	potD	sp|P0AFK9|POTD_ECOLI Spermidine/putrescine-binding periplasmic protein OS=Escherichia coli (strain K12) OX=83333 GN=potD PE=1 SV=1	1	12	12	12	5	8	5	7	9	8	5	8	5	7	9	8	5	8	5	7	9	8	43.4	43.4	43.4	38.867	348	348	0	41.784	By MS/MS	By MS/MS	By MS/MS	By MS/MS	By MS/MS	By MS/MS	16.7	28.2	17.8	22.4	31.9	28.2
P0AFL3	P0AFL3	2	2	2	Peptidyl-prolyl cis-trans isomerase A	ppiA	sp|P0AFL3|PPIA_ECOLI Peptidyl-prolyl cis-trans isomerase A OS=Escherichia coli (strain K12) OX=83333 GN=ppiA PE=1 SV=1	1	2	2	2	1	1	1	2	1	1	1	1	1	2	1	1	1	1	1	2	1	1	25.3	25.3	25.3	20.431	190	190	0	17.425	By matching	By MS/MS	By matching	By MS/MS	By MS/MS	By matching	11.6	11.6	11.6	25.3	11.6	11.6
P0AFL6	P0AFL6	8	8	8	Exopolyphosphatase	ppx	sp|P0AFL6|PPX_ECOLI Exopolyphosphatase OS=Escherichia coli (strain K12) OX=83333 GN=ppx PE=1 SV=2	1	8	8	8	1	2	0	3	6	5	1	2	0	3	6	5	1	2	0	3	6	5	16.8	16.8	16.8	58.135	513	513	0	30.851	By matching	By MS/MS		By MS/MS	By MS/MS	By MS/MS	1.9	3.5	0	6	13.1	9
P0AFM2	P0AFM2	8	8	8	Glycine betaine-binding periplasmic protein	proX	sp|P0AFM2|PROX_ECOLI Glycine betaine/proline betaine-binding periplasmic protein OS=Escherichia coli (strain K12) OX=83333 GN=proX PE=1 SV=1	1	8	8	8	6	6	7	5	6	5	6	6	7	5	6	5	6	6	7	5	6	5	40.3	40.3	40.3	36.022	330	330	0	152.69	By MS/MS	By MS/MS	By MS/MS	By MS/MS	By MS/MS	By MS/MS	29.4	31.8	35.5	27	30	27
P0AFM6	P0AFM6	8	8	8	Phage shock protein A	pspA	sp|P0AFM6|PSPA_ECOLI Phage shock protein A OS=Escherichia coli (strain K12) OX=83333 GN=pspA PE=1 SV=2	1	8	8	8	6	5	6	6	4	5	6	5	6	6	4	5	6	5	6	6	4	5	34.7	34.7	34.7	25.493	222	222	0	43.12	By MS/MS	By MS/MS	By MS/MS	By MS/MS	By MS/MS	By MS/MS	29.7	26.6	29.7	28.4	21.6	27.5
P0AFP4	P0AFP4	1	1	1	Uncharacterized oxidoreductase YbbO	ybbO	sp|P0AFP4|YBBO_ECOLI Uncharacterized oxidoreductase YbbO OS=Escherichia coli (strain K12) OX=83333 GN=ybbO PE=3 SV=1	1	1	1	1	0	0	1	0	1	1	0	0	1	0	1	1	0	0	1	0	1	1	3.7	3.7	3.7	29.41	269	269	0.0065963	2.5537			By matching		By MS/MS	By MS/MS	0	0	3.7	0	3.7	3.7
P0AFP6	P0AFP6	4	4	4	Putative GTP cyclohydrolase 1 type 2	ybgI	sp|P0AFP6|GCH1L_ECOLI GTP cyclohydrolase 1 type 2 homolog OS=Escherichia coli (strain K12) OX=83333 GN=ybgI PE=1 SV=1	1	4	4	4	1	4	3	2	3	4	1	4	3	2	3	4	1	4	3	2	3	4	25.9	25.9	25.9	26.892	247	247	0	47.285	By MS/MS	By MS/MS	By MS/MS	By MS/MS	By MS/MS	By MS/MS	6.9	25.9	19	11.3	21.5	25.9
P0AFQ7	P0AFQ7	6	6	6	Uncharacterized deoxyribonuclease YcfH	ycfH	sp|P0AFQ7|YCFH_ECOLI Uncharacterized metal-dependent hydrolase YcfH OS=Escherichia coli (strain K12) OX=83333 GN=ycfH PE=1 SV=1	1	6	6	6	4	2	2	5	3	2	4	2	2	5	3	2	4	2	2	5	3	2	27.5	27.5	27.5	29.808	265	265	0	25.885	By MS/MS	By MS/MS	By MS/MS	By MS/MS	By MS/MS	By MS/MS	15.1	9.1	9.4	21.5	15.5	9.4
P0AFR0	P0AFR0	2	2	2	NTE family protein RssA	rssA	sp|P0AFR0|RSSA_ECOLI NTE family protein RssA OS=Escherichia coli (strain K12) OX=83333 GN=rssA PE=3 SV=2	1	2	2	2	0	0	0	2	0	1	0	0	0	2	0	1	0	0	0	2	0	1	7.6	7.6	7.6	33.067	301	301	0	4.139				By MS/MS		By MS/MS	0	0	0	7.6	0	3.7
P0AFR2	P0AFR2	2	2	2	C4-dicarboxylic acid transporter DauA	dauA	sp|P0AFR2|DAUA_ECOLI C4-dicarboxylic acid transporter DauA OS=Escherichia coli (strain K12) OX=83333 GN=dauA PE=1 SV=2	1	2	2	2	1	1	1	1	2	1	1	1	1	1	2	1	1	1	1	1	2	1	3.4	3.4	3.4	59.428	559	559	0.004788	3.0366	By matching	By matching	By matching	By MS/MS	By MS/MS	By matching	1.6	1.6	1.6	1.6	3.4	1.6
P0AFR4	P0AFR4	5	5	5	Uncharacterized protein YciO	yciO	sp|P0AFR4|YCIO_ECOLI Uncharacterized protein YciO OS=Escherichia coli (strain K12) OX=83333 GN=yciO PE=1 SV=1	1	5	5	5	1	3	0	1	5	4	1	3	0	1	5	4	1	3	0	1	5	4	30.6	30.6	30.6	23.211	206	206	0	16.015	By MS/MS	By MS/MS		By MS/MS	By MS/MS	By MS/MS	4.9	15.5	0	4.9	30.6	24.8
P0AFS7	P0AFS7	1	1	1	UPF0118 inner membrane protein YdiK	ydiK	sp|P0AFS7|YDIK_ECOLI Putative transport protein YdiK OS=Escherichia coli (strain K12) OX=83333 GN=ydiK PE=1 SV=1	1	1	1	1	0	0	1	0	1	1	0	0	1	0	1	1	0	0	1	0	1	1	3.5	3.5	3.5	39.841	370	370	0.0060647	2.8689			By matching		By MS/MS	By MS/MS	0	0	3.5	0	3.5	3.5
P0AFU8	P0AFU8	6	6	6	Riboflavin synthase	ribC	sp|P0AFU8|RISA_ECOLI Riboflavin synthase OS=Escherichia coli (strain K12) OX=83333 GN=ribC PE=1 SV=1	1	6	6	6	4	4	3	5	5	6	4	4	3	5	5	6	4	4	3	5	5	6	30.5	30.5	30.5	23.445	213	213	0	48.343	By MS/MS	By MS/MS	By matching	By MS/MS	By MS/MS	By MS/MS	21.1	21.1	12.7	26.8	24.9	30.5
P0AFW0	P0AFW0	2	2	2	Transcription antitermination protein RfaH	rfaH	sp|P0AFW0|RFAH_ECOLI Transcription antitermination protein RfaH OS=Escherichia coli (strain K12) OX=83333 GN=rfaH PE=1 SV=1	1	2	2	2	0	0	1	0	2	1	0	0	1	0	2	1	0	0	1	0	2	1	14.2	14.2	14.2	18.34	162	162	0	5.4632			By matching		By MS/MS	By MS/MS	0	0	8	0	14.2	8
P0AFX0	P0AFX0	2	2	2	Ribosome hibernation promoting factor	hpf	sp|P0AFX0|HPF_ECOLI Ribosome hibernation promoting factor OS=Escherichia coli (strain K12) OX=83333 GN=hpf PE=1 SV=1	1	2	2	2	0	1	0	1	1	2	0	1	0	1	1	2	0	1	0	1	1	2	16.8	16.8	16.8	10.75	95	95	0	3.9774		By MS/MS		By matching	By MS/MS	By MS/MS	0	9.5	0	7.4	7.4	16.8
P0AFX9	P0AFX9	3	3	3	Sigma-E factor regulatory protein RseB	rseB	sp|P0AFX9|RSEB_ECOLI Sigma-E factor regulatory protein RseB OS=Escherichia coli (strain K12) OX=83333 GN=rseB PE=1 SV=1	1	3	3	3	1	1	0	2	1	1	1	1	0	2	1	1	1	1	0	2	1	1	13.2	13.2	13.2	35.749	318	318	0	9.2354	By matching	By matching		By MS/MS	By MS/MS	By MS/MS	3.8	3.8	0	8.8	3.8	4.4
P0AFY8	P0AFY8	7	7	7	Negative modulator of initiation of replication	seqA	sp|P0AFY8|SEQA_ECOLI Negative modulator of initiation of replication OS=Escherichia coli (strain K12) OX=83333 GN=seqA PE=1 SV=1	1	7	7	7	7	7	6	7	7	7	7	7	6	7	7	7	7	7	6	7	7	7	50.8	50.8	50.8	20.315	181	181	0	158.55	By MS/MS	By MS/MS	By MS/MS	By MS/MS	By MS/MS	By MS/MS	50.8	50.8	44.8	50.8	50.8	50.8
P0AFZ1	P0AFZ1	1	1	1	Protein SseB	sseB	sp|P0AFZ1|SSEB_ECOLI Protein SseB OS=Escherichia coli (strain K12) OX=83333 GN=sseB PE=4 SV=1	1	1	1	1	0	0	0	1	1	1	0	0	0	1	1	1	0	0	0	1	1	1	3.5	3.5	3.5	28.642	258	258	0	4.3497				By MS/MS	By MS/MS	By MS/MS	0	0	0	3.5	3.5	3.5
P0AFZ3	P0AFZ3	3	3	3	Stringent starvation protein B	sspB	sp|P0AFZ3|SSPB_ECOLI Stringent starvation protein B OS=Escherichia coli (strain K12) OX=83333 GN=sspB PE=1 SV=1	1	3	3	3	1	1	0	3	2	3	1	1	0	3	2	3	1	1	0	3	2	3	20	20	20	18.262	165	165	0	20.766	By MS/MS	By MS/MS		By MS/MS	By MS/MS	By MS/MS	6.7	6.7	0	20	13.3	20
P0AG00	P0AG00	4	4	4	Lipopolysaccharide biosynthesis protein WzzE	wzzE	sp|P0AG00|WZZE_ECOLI ECA polysaccharide chain length modulation protein OS=Escherichia coli (strain K12) OX=83333 GN=wzzE PE=1 SV=2	1	4	4	4	0	1	0	3	2	2	0	1	0	3	2	2	0	1	0	3	2	2	16.1	16.1	16.1	39.489	348	348	0	11.278		By matching		By MS/MS	By MS/MS	By MS/MS	0	4	0	10.3	9.8	9.8
P0AG03	P0AG03	1	1	1	3-octaprenyl-4-hydroxybenzoate carboxy-lyase partner protein	ubiX	sp|P0AG03|UBIX_ECOLI Flavin prenyltransferase UbiX OS=Escherichia coli (strain K12) OX=83333 GN=ubiX PE=2 SV=1	1	1	1	1	0	0	0	1	0	0	0	0	0	1	0	0	0	0	0	1	0	0	6.9	6.9	6.9	20.695	189	189	0	4.7342				By MS/MS			0	0	0	6.9	0	0
P0AG07	P0AG07	6	6	6	Ribulose-phosphate 3-epimerase	rpe	sp|P0AG07|RPE_ECOLI Ribulose-phosphate 3-epimerase OS=Escherichia coli (strain K12) OX=83333 GN=rpe PE=1 SV=1	1	6	6	6	2	3	3	4	6	6	2	3	3	4	6	6	2	3	3	4	6	6	42.7	42.7	42.7	24.554	225	225	0	79.601	By matching	By MS/MS	By MS/MS	By MS/MS	By MS/MS	By MS/MS	15.6	21.3	14.2	29.8	42.7	42.7
P0AG14	P0AG14	7	7	7	Probable protease SohB	sohB	sp|P0AG14|SOHB_ECOLI Probable protease SohB OS=Escherichia coli (strain K12) OX=83333 GN=sohB PE=1 SV=1	1	7	7	7	3	2	3	4	5	6	3	2	3	4	5	6	3	2	3	4	5	6	23.8	23.8	23.8	39.366	349	349	0	179.26	By MS/MS	By MS/MS	By MS/MS	By MS/MS	By MS/MS	By MS/MS	9.5	5.4	9.5	13.2	17.2	20.9
P0AG16	P0AG16	5	5	5	Amidophosphoribosyltransferase	purF	sp|P0AG16|PUR1_ECOLI Amidophosphoribosyltransferase OS=Escherichia coli (strain K12) OX=83333 GN=purF PE=1 SV=2	1	5	5	5	0	1	0	3	3	2	0	1	0	3	3	2	0	1	0	3	3	2	14.9	14.9	14.9	56.487	505	505	0	12.831		By matching		By MS/MS	By MS/MS	By MS/MS	0	2.2	0	6.9	8.5	7.9
P0AG20	P0AG20	7	7	7	GTP pyrophosphokinase	relA	sp|P0AG20|RELA_ECOLI GTP pyrophosphokinase OS=Escherichia coli (strain K12) OX=83333 GN=relA PE=1 SV=1	1	7	7	7	3	2	0	6	2	3	3	2	0	6	2	3	3	2	0	6	2	3	9.7	9.7	9.7	83.875	744	744	0	16.525	By matching	By matching		By MS/MS	By MS/MS	By MS/MS	3.9	2.6	0	8.3	2.6	3.8
P0AG24	P0AG24	14	14	14	Bifunctional (p)ppGpp synthase/hydrolase SpoT;GTP pyrophosphokinase;Guanosine-3,5-bis(diphosphate) 3-pyrophosphohydrolase	spoT	sp|P0AG24|SPOT_ECOLI Bifunctional (p)ppGpp synthase/hydrolase SpoT OS=Escherichia coli (strain K12) OX=83333 GN=spoT PE=1 SV=1	1	14	14	14	1	1	1	8	10	10	1	1	1	8	10	10	1	1	1	8	10	10	20.8	20.8	20.8	79.342	702	702	0	59.251	By matching	By matching	By matching	By MS/MS	By MS/MS	By MS/MS	1.6	1.6	1.6	11.4	14.7	15.1
P0AG27	P0AG27	5	5	5	Uncharacterized protein YibN	yibN	sp|P0AG27|YIBN_ECOLI Uncharacterized protein YibN OS=Escherichia coli (strain K12) OX=83333 GN=yibN PE=1 SV=1	1	5	5	5	4	4	4	4	5	5	4	4	4	4	5	5	4	4	4	4	5	5	40.6	40.6	40.6	15.596	143	143	0	48.074	By MS/MS	By MS/MS	By MS/MS	By MS/MS	By MS/MS	By MS/MS	30.1	30.1	30.1	30.1	40.6	40.6
P0AG30	P0AG30	24	24	24	Transcription termination factor Rho	rho	sp|P0AG30|RHO_ECOLI Transcription termination factor Rho OS=Escherichia coli (strain K12) OX=83333 GN=rho PE=1 SV=1	1	24	24	24	20	11	13	24	23	24	20	11	13	24	23	24	20	11	13	24	23	24	63.7	63.7	63.7	47.004	419	419	0	323.31	By MS/MS	By MS/MS	By MS/MS	By MS/MS	By MS/MS	By MS/MS	51.3	33.9	41.3	63.7	63.7	63.7
P0AG40	P0AG40	18	18	18	Riboflavin biosynthesis protein RibF;Riboflavin kinase;FMN adenylyltransferase	ribF	sp|P0AG40|RIBF_ECOLI Bifunctional riboflavin kinase/FMN adenylyltransferase OS=Escherichia coli (strain K12) OX=83333 GN=ribF PE=1 SV=1	1	18	18	18	6	2	2	18	15	18	6	2	2	18	15	18	6	2	2	18	15	18	66.8	66.8	66.8	34.734	313	313	0	320.4	By MS/MS	By matching	By matching	By MS/MS	By MS/MS	By MS/MS	26.5	5.8	10.5	66.8	61.3	66.8
P0AG44	P0AG44	6	6	6	50S ribosomal protein L17	rplQ	sp|P0AG44|RL17_ECOLI 50S ribosomal protein L17 OS=Escherichia coli (strain K12) OX=83333 GN=rplQ PE=1 SV=1	1	6	6	6	5	6	6	6	6	6	5	6	6	6	6	6	5	6	6	6	6	6	40.2	40.2	40.2	14.364	127	127	0	36.967	By MS/MS	By MS/MS	By MS/MS	By MS/MS	By MS/MS	By MS/MS	33.1	40.2	40.2	40.2	40.2	40.2
P0AG48	P0AG48	4	4	4	50S ribosomal protein L21	rplU	sp|P0AG48|RL21_ECOLI 50S ribosomal protein L21 OS=Escherichia coli (strain K12) OX=83333 GN=rplU PE=1 SV=1	1	4	4	4	4	3	3	3	3	3	4	3	3	3	3	3	4	3	3	3	3	3	35.9	35.9	35.9	11.564	103	103	0	11.174	By MS/MS	By MS/MS	By MS/MS	By MS/MS	By MS/MS	By MS/MS	35.9	28.2	28.2	28.2	28.2	28.2
P0AG51	P0AG51	4	4	4	50S ribosomal protein L30	rpmD	sp|P0AG51|RL30_ECOLI 50S ribosomal protein L30 OS=Escherichia coli (strain K12) OX=83333 GN=rpmD PE=1 SV=2	1	4	4	4	2	4	3	2	2	2	2	4	3	2	2	2	2	4	3	2	2	2	57.6	57.6	57.6	6.5417	59	59	0	12.459	By MS/MS	By MS/MS	By MS/MS	By MS/MS	By MS/MS	By MS/MS	27.1	57.6	45.8	27.1	33.9	27.1
P0AG55	P0AG55	10	10	10	50S ribosomal protein L6	rplF	sp|P0AG55|RL6_ECOLI 50S ribosomal protein L6 OS=Escherichia coli (strain K12) OX=83333 GN=rplF PE=1 SV=2	1	10	10	10	10	9	10	10	9	10	10	9	10	10	9	10	10	9	10	10	9	10	75.1	75.1	75.1	18.904	177	177	0	185.73	By MS/MS	By MS/MS	By MS/MS	By MS/MS	By MS/MS	By MS/MS	75.1	55.4	75.1	75.1	71.2	75.1
P0AG59	P0AG59	2	2	2	30S ribosomal protein S14	rpsN	sp|P0AG59|RS14_ECOLI 30S ribosomal protein S14 OS=Escherichia coli (strain K12) OX=83333 GN=rpsN PE=1 SV=2	1	2	2	2	2	2	2	2	2	2	2	2	2	2	2	2	2	2	2	2	2	2	18.8	18.8	18.8	11.58	101	101	0	46.924	By MS/MS	By MS/MS	By MS/MS	By MS/MS	By MS/MS	By MS/MS	18.8	18.8	18.8	18.8	18.8	18.8
P0AG63	P0AG63	2	2	2	30S ribosomal protein S17	rpsQ	sp|P0AG63|RS17_ECOLI 30S ribosomal protein S17 OS=Escherichia coli (strain K12) OX=83333 GN=rpsQ PE=1 SV=2	1	2	2	2	2	2	2	2	2	2	2	2	2	2	2	2	2	2	2	2	2	2	32.1	32.1	32.1	9.7043	84	84	0	23.206	By MS/MS	By MS/MS	By MS/MS	By MS/MS	By MS/MS	By MS/MS	32.1	32.1	32.1	32.1	32.1	32.1
P0AG67	P0AG67	31	31	31	30S ribosomal protein S1	rpsA	sp|P0AG67|RS1_ECOLI 30S ribosomal protein S1 OS=Escherichia coli (strain K12) OX=83333 GN=rpsA PE=1 SV=1	1	31	31	31	27	28	27	31	29	28	27	28	27	31	29	28	27	28	27	31	29	28	63.2	63.2	63.2	61.157	557	557	0	323.31	By MS/MS	By MS/MS	By MS/MS	By MS/MS	By MS/MS	By MS/MS	54.9	53	57.3	63.2	57.6	60.9
P0AG71	P0AG71	2	2	2	DNA recombination protein RmuC	rmuC	sp|P0AG71|RMUC_ECOLI DNA recombination protein RmuC OS=Escherichia coli (strain K12) OX=83333 GN=rmuC PE=3 SV=1	1	2	2	2	0	0	0	2	0	1	0	0	0	2	0	1	0	0	0	2	0	1	4.4	4.4	4.4	54.764	475	475	0.0021277	3.5392				By MS/MS		By matching	0	0	0	4.4	0	2.3
P0AG76	P0AG76	2	2	2	Nuclease SbcCD subunit D	sbcD	sp|P0AG76|SBCD_ECOLI Nuclease SbcCD subunit D OS=Escherichia coli (strain K12) OX=83333 GN=sbcD PE=1 SV=1	1	2	2	2	0	1	0	1	1	0	0	1	0	1	1	0	0	1	0	1	1	0	8	8	8	44.713	400	400	0.006077	2.8949		By MS/MS		By MS/MS	By MS/MS		0	4.8	0	3.2	4.8	0
P0AG86	P0AG86	6	6	6	Protein-export protein SecB	secB	sp|P0AG86|SECB_ECOLI Protein-export protein SecB OS=Escherichia coli (strain K12) OX=83333 GN=secB PE=1 SV=1	1	6	6	6	5	5	4	6	6	6	5	5	4	6	6	6	5	5	4	6	6	6	64.5	64.5	64.5	17.277	155	155	0	262.65	By MS/MS	By MS/MS	By MS/MS	By MS/MS	By MS/MS	By MS/MS	41.9	41.9	37.4	64.5	64.5	64.5
P0AG90	P0AG90	21	21	21	Protein translocase subunit SecD	secD	sp|P0AG90|SECD_ECOLI Protein translocase subunit SecD OS=Escherichia coli (strain K12) OX=83333 GN=secD PE=1 SV=1	1	21	21	21	11	14	11	16	16	18	11	14	11	16	16	18	11	14	11	16	16	18	38.9	38.9	38.9	66.631	615	615	0	119.95	By MS/MS	By MS/MS	By MS/MS	By MS/MS	By MS/MS	By MS/MS	21.3	26.7	22.6	29.3	29.8	33.2
P0AG93	P0AG93	6	6	6	Protein translocase subunit SecF	secF	sp|P0AG93|SECF_ECOLI Protein translocase subunit SecF OS=Escherichia coli (strain K12) OX=83333 GN=secF PE=1 SV=1	1	6	6	6	2	3	2	3	5	5	2	3	2	3	5	5	2	3	2	3	5	5	28.5	28.5	28.5	35.382	323	323	0	49.865	By MS/MS	By MS/MS	By MS/MS	By MS/MS	By MS/MS	By MS/MS	8	14.2	11.5	13.9	23.2	25.4
P0AG96	P0AG96	1	1	1	Protein translocase subunit SecE	secE	sp|P0AG96|SECE_ECOLI Protein translocase subunit SecE OS=Escherichia coli (strain K12) OX=83333 GN=secE PE=1 SV=1	1	1	1	1	0	0	0	1	0	0	0	0	0	1	0	0	0	0	0	1	0	0	7.1	7.1	7.1	13.643	127	127	0.0091503	2.4406				By MS/MS			0	0	0	7.1	0	0
P0AG99	P0AG99	2	2	2	Protein-export membrane protein SecG	secG	sp|P0AG99|SECG_ECOLI Protein-export membrane protein SecG OS=Escherichia coli (strain K12) OX=83333 GN=secG PE=1 SV=1	1	2	2	2	1	2	2	2	2	2	1	2	2	2	2	2	1	2	2	2	2	2	27.3	27.3	27.3	11.365	110	110	0	28.347	By MS/MS	By MS/MS	By MS/MS	By MS/MS	By MS/MS	By MS/MS	10.9	27.3	27.3	27.3	27.3	27.3
P0AGA2	P0AGA2	6	6	6	Protein translocase subunit SecY	secY	sp|P0AGA2|SECY_ECOLI Protein translocase subunit SecY OS=Escherichia coli (strain K12) OX=83333 GN=secY PE=1 SV=1	1	6	6	6	5	4	5	5	6	5	5	4	5	5	6	5	5	4	5	5	6	5	14	14	14	48.511	443	443	0	47.334	By MS/MS	By MS/MS	By MS/MS	By MS/MS	By MS/MS	By MS/MS	12.4	10.2	12.4	12.4	14	12.4
P0AGB0	P0AGB0	2	2	2	Phosphoserine phosphatase	serB	sp|P0AGB0|SERB_ECOLI Phosphoserine phosphatase OS=Escherichia coli (strain K12) OX=83333 GN=serB PE=1 SV=1	1	2	2	2	1	1	0	2	1	2	1	1	0	2	1	2	1	1	0	2	1	2	9.3	9.3	9.3	35.042	322	322	0	8.8357	By matching	By matching		By MS/MS	By MS/MS	By MS/MS	4.7	4.7	0	9.3	4.7	9.3
P0AGB6	P0AGB6	4	4	4	ECF RNA polymerase sigma-E factor	rpoE	sp|P0AGB6|RPOE_ECOLI ECF RNA polymerase sigma-E factor OS=Escherichia coli (strain K12) OX=83333 GN=rpoE PE=1 SV=1	1	4	4	4	0	0	0	3	2	3	0	0	0	3	2	3	0	0	0	3	2	3	29.8	29.8	29.8	21.695	191	191	0	11.902				By MS/MS	By MS/MS	By MS/MS	0	0	0	25.7	15.7	25.7
P0AGD3	P0AGD3	7	7	7	Superoxide dismutase [Fe]	sodB	sp|P0AGD3|SODF_ECOLI Superoxide dismutase [Fe] OS=Escherichia coli (strain K12) OX=83333 GN=sodB PE=1 SV=2	1	7	7	7	7	7	6	7	6	6	7	7	6	7	6	6	7	7	6	7	6	6	44.6	44.6	44.6	21.265	193	193	0	71.153	By MS/MS	By MS/MS	By MS/MS	By MS/MS	By MS/MS	By MS/MS	44.6	44.6	37.3	44.6	37.3	37.3
P0AGD7	P0AGD7	21	21	21	Signal recognition particle protein	ffh	sp|P0AGD7|SRP54_ECOLI Signal recognition particle protein OS=Escherichia coli (strain K12) OX=83333 GN=ffh PE=1 SV=1	1	21	21	21	6	3	4	20	20	20	6	3	4	20	20	20	6	3	4	20	20	20	63.4	63.4	63.4	49.787	453	453	0	323.31	By MS/MS	By MS/MS	By MS/MS	By MS/MS	By MS/MS	By MS/MS	16.3	8.2	10.6	60.9	55.8	55.8
P0AGE0	P0AGE0	5	5	5	Single-stranded DNA-binding protein	ssb	sp|P0AGE0|SSB_ECOLI Single-stranded DNA-binding protein OS=Escherichia coli (strain K12) OX=83333 GN=ssb PE=1 SV=2	1	5	5	5	4	2	4	4	5	5	4	2	4	4	5	5	4	2	4	4	5	5	28.7	28.7	28.7	18.975	178	178	0	45.409	By MS/MS	By MS/MS	By MS/MS	By MS/MS	By MS/MS	By MS/MS	23.6	11.8	24.7	23.6	28.7	28.7
P0AGE6	P0AGE6	2	2	2	Chromate reductase	chrR	sp|P0AGE6|CHRR_ECOLI Quinone reductase OS=Escherichia coli (strain K12) OX=83333 GN=chrR PE=1 SV=1	1	2	2	2	1	0	1	2	2	2	1	0	1	2	2	2	1	0	1	2	2	2	10.1	10.1	10.1	20.375	188	188	0	4.0472	By matching		By matching	By MS/MS	By MS/MS	By MS/MS	4.3	0	4.3	10.1	10.1	10.1
P0AGE9	P0AGE9	12	12	12	Succinyl-CoA ligase [ADP-forming] subunit alpha	sucD	sp|P0AGE9|SUCD_ECOLI Succinate--CoA ligase [ADP-forming] subunit alpha OS=Escherichia coli (strain K12) OX=83333 GN=sucD PE=1 SV=2	1	12	12	12	6	9	6	11	9	9	6	9	6	11	9	9	6	9	6	11	9	9	60.6	60.6	60.6	29.777	289	289	0	98.533	By MS/MS	By MS/MS	By MS/MS	By MS/MS	By MS/MS	By MS/MS	22.8	43.9	21.8	53.3	42.9	45
P0AGF2	P0AGF2	5	5	5	Sulfur acceptor protein CsdE	csdE	sp|P0AGF2|CSDE_ECOLI Sulfur acceptor protein CsdE OS=Escherichia coli (strain K12) OX=83333 GN=csdE PE=1 SV=1	1	5	5	5	4	2	4	4	3	2	4	2	4	4	3	2	4	2	4	4	3	2	49.7	49.7	49.7	15.94	147	147	0	108.36	By MS/MS	By MS/MS	By MS/MS	By MS/MS	By MS/MS	By MS/MS	41.5	21.8	40.8	41.5	30.6	21.8
P0AGF6	P0AGF6	14	14	14	L-threonine dehydratase catabolic TdcB	tdcB	sp|P0AGF6|TDCB_ECOLI L-threonine dehydratase catabolic TdcB OS=Escherichia coli (strain K12) OX=83333 GN=tdcB PE=1 SV=1	1	14	14	14	6	7	7	13	14	14	6	7	7	13	14	14	6	7	7	13	14	14	46.8	46.8	46.8	35.232	329	329	0	197.59	By MS/MS	By MS/MS	By MS/MS	By MS/MS	By MS/MS	By MS/MS	21.9	23.7	28.6	42.2	46.8	46.8
P0AGG0	P0AGG0	1	1	1	Thiamine-monophosphate kinase	thiL	sp|P0AGG0|THIL_ECOLI Thiamine-monophosphate kinase OS=Escherichia coli (strain K12) OX=83333 GN=thiL PE=1 SV=1	1	1	1	1	0	0	0	1	1	1	0	0	0	1	1	1	0	0	0	1	1	1	2.8	2.8	2.8	35.07	325	325	0.0078895	2.5109				By MS/MS	By MS/MS	By MS/MS	0	0	0	2.8	2.8	2.8
P0AGG2	P0AGG2	8	8	8	Acyl-CoA thioesterase 2	tesB	sp|P0AGG2|TESB_ECOLI Acyl-CoA thioesterase 2 OS=Escherichia coli (strain K12) OX=83333 GN=tesB PE=1 SV=2	1	8	8	8	2	1	2	5	5	6	2	1	2	5	5	6	2	1	2	5	5	6	28.3	28.3	28.3	31.966	286	286	0	35.013	By matching	By matching	By MS/MS	By MS/MS	By MS/MS	By MS/MS	7	3.5	5.9	18.5	19.6	22
P0AGG8	P0AGG8	9	9	9	Metalloprotease TldD	tldD	sp|P0AGG8|TLDD_ECOLI Metalloprotease TldD OS=Escherichia coli (strain K12) OX=83333 GN=tldD PE=1 SV=1	1	9	9	9	4	5	1	3	8	6	4	5	1	3	8	6	4	5	1	3	8	6	33.7	33.7	33.7	51.363	481	481	0	46.372	By MS/MS	By MS/MS	By MS/MS	By MS/MS	By MS/MS	By MS/MS	11	15.8	2.7	8.3	28.7	20.6
P0AGI1	P0AGI1	2	2	2	Ribose transport system permease protein RbsC	rbsC	sp|P0AGI1|RBSC_ECOLI Ribose import permease protein RbsC OS=Escherichia coli (strain K12) OX=83333 GN=rbsC PE=1 SV=1	1	2	2	2	2	1	2	2	1	2	2	1	2	2	1	2	2	1	2	2	1	2	6.5	6.5	6.5	33.451	321	321	0	8.1523	By MS/MS	By MS/MS	By MS/MS	By MS/MS	By MS/MS	By MS/MS	6.5	4	6.5	6.5	4	6.5
P0AGI8	P0AGI8	3	3	3	Trk system potassium uptake protein TrkA	trkA	sp|P0AGI8|TRKA_ECOLI Trk system potassium uptake protein TrkA OS=Escherichia coli (strain K12) OX=83333 GN=trkA PE=1 SV=1	1	3	3	3	1	0	0	2	3	2	1	0	0	2	3	2	1	0	0	2	3	2	7.4	7.4	7.4	50.367	458	458	0	12.596	By matching			By MS/MS	By MS/MS	By MS/MS	2.2	0	0	5.2	7.4	5.2
P0AGJ2	P0AGJ2	3	3	3	tRNA (guanosine(18)-2-O)-methyltransferase	trmH	sp|P0AGJ2|TRMH_ECOLI tRNA (guanosine(18)-2-O)-methyltransferase OS=Escherichia coli (strain K12) OX=83333 GN=trmH PE=1 SV=1	1	3	3	3	0	0	0	2	1	3	0	0	0	2	1	3	0	0	0	2	1	3	14.8	14.8	14.8	25.343	229	229	0	8.4338				By MS/MS	By MS/MS	By MS/MS	0	0	0	9.6	5.2	14.8
P0AGJ5	P0AGJ5	11	11	11	Uncharacterized tRNA/rRNA methyltransferase YfiF	yfiF	sp|P0AGJ5|YFIF_ECOLI Uncharacterized tRNA/rRNA methyltransferase YfiF OS=Escherichia coli (strain K12) OX=83333 GN=yfiF PE=1 SV=1	1	11	11	11	6	4	6	7	8	7	6	4	6	7	8	7	6	4	6	7	8	7	41.7	41.7	41.7	37.784	345	345	0	72.384	By MS/MS	By MS/MS	By MS/MS	By MS/MS	By MS/MS	By MS/MS	23.2	18.6	27.2	28.1	30.7	27.5
P0AGJ9	P0AGJ9	13	13	13	Tyrosine--tRNA ligase	tyrS	sp|P0AGJ9|SYY_ECOLI Tyrosine--tRNA ligase OS=Escherichia coli (strain K12) OX=83333 GN=tyrS PE=1 SV=2	1	13	13	13	11	10	10	12	13	10	11	10	10	12	13	10	11	10	10	12	13	10	41.3	41.3	41.3	47.526	424	424	0	278.67	By MS/MS	By MS/MS	By MS/MS	By MS/MS	By MS/MS	By MS/MS	37	31.1	31.1	39.4	41.3	30
P0AGK4	P0AGK4	2	2	2	RNA-binding protein YhbY	yhbY	sp|P0AGK4|YHBY_ECOLI RNA-binding protein YhbY OS=Escherichia coli (strain K12) OX=83333 GN=yhbY PE=1 SV=1	1	2	2	2	2	2	2	2	1	2	2	2	2	2	1	2	2	2	2	2	1	2	18.6	18.6	18.6	10.784	97	97	0	5.0933	By MS/MS	By MS/MS	By MS/MS	By MS/MS	By MS/MS	By MS/MS	18.6	18.6	18.6	18.6	9.3	18.6
P0AGK8	P0AGK8	3	3	3	HTH-type transcriptional regulator IscR	iscR	sp|P0AGK8|ISCR_ECOLI HTH-type transcriptional regulator IscR OS=Escherichia coli (strain K12) OX=83333 GN=iscR PE=1 SV=1	1	3	3	3	2	1	0	3	3	3	2	1	0	3	3	3	2	1	0	3	3	3	24.7	24.7	24.7	17.336	162	162	0	167.97	By MS/MS	By MS/MS		By MS/MS	By MS/MS	By MS/MS	19.8	13.6	0	24.7	24.7	24.7
P0AGL2	P0AGL2	2	2	2	Putative reactive intermediate deaminase TdcF	tdcF	sp|P0AGL2|TDCF_ECOLI Putative reactive intermediate deaminase TdcF OS=Escherichia coli (strain K12) OX=83333 GN=tdcF PE=1 SV=1	1	2	2	2	2	2	1	2	1	1	2	2	1	2	1	1	2	2	1	2	1	1	18.6	18.6	18.6	14.007	129	129	0	13.257	By MS/MS	By MS/MS	By MS/MS	By MS/MS	By MS/MS	By MS/MS	18.6	18.6	7	18.6	7	7
P0AGL5	P0AGL5	4	4	4	Ribosome association toxin RatA	ratA	sp|P0AGL5|RATA_ECOLI Ribosome association toxin RatA OS=Escherichia coli (strain K12) OX=83333 GN=ratA PE=1 SV=1	1	4	4	4	1	0	0	3	4	4	1	0	0	3	4	4	1	0	0	3	4	4	34.2	34.2	34.2	17.726	158	158	0	25.511	By matching			By MS/MS	By MS/MS	By MS/MS	5.1	0	0	27.8	34.2	34.2
P0AGL7	P0AGL7	2	2	2	Ribosomal RNA small subunit methyltransferase E	rsmE	sp|P0AGL7|RSME_ECOLI Ribosomal RNA small subunit methyltransferase E OS=Escherichia coli (strain K12) OX=83333 GN=rsmE PE=1 SV=1	1	2	2	2	1	0	1	1	2	2	1	0	1	1	2	2	1	0	1	1	2	2	12.3	12.3	12.3	26.978	243	243	0	9.5709	By matching		By matching	By MS/MS	By MS/MS	By MS/MS	4.5	0	4.5	4.5	12.3	12.3
P0AGM5	P0AGM5	1	1	1	Protein sirB1	sirB1	sp|P0AGM5|SIRB1_ECOLI UPF0162 protein YchA OS=Escherichia coli (strain K12) OX=83333 GN=ychA PE=3 SV=1	1	1	1	1	0	0	0	1	1	1	0	0	0	1	1	1	0	0	0	1	1	1	4.5	4.5	4.5	30.841	269	269	0	4.2553				By MS/MS	By MS/MS	By matching	0	0	0	4.5	4.5	4.5
P0AGM7	P0AGM7	2	2	2	Uracil permease	uraA	sp|P0AGM7|URAA_ECOLI Uracil permease OS=Escherichia coli (strain K12) OX=83333 GN=uraA PE=1 SV=1	1	2	2	2	1	1	1	0	1	2	1	1	1	0	1	2	1	1	1	0	1	2	7.2	7.2	7.2	45.06	429	429	0	13.133	By MS/MS	By MS/MS	By matching		By MS/MS	By MS/MS	5.1	5.1	2.1	0	5.1	7.2
P0C018	P0C018	4	4	4	50S ribosomal protein L18	rplR	sp|P0C018|RL18_ECOLI 50S ribosomal protein L18 OS=Escherichia coli (strain K12) OX=83333 GN=rplR PE=1 SV=1	1	4	4	4	4	3	4	4	4	4	4	3	4	4	4	4	4	3	4	4	4	4	41	41	41	12.769	117	117	0	82.024	By MS/MS	By MS/MS	By MS/MS	By MS/MS	By MS/MS	By MS/MS	41	34.2	41	41	41	41
[truncated: 702 more rows]
[truncated: 34 more columns]
