# Supplementary material for: Chemoproteomic identification of phosphohistidine acceptors: posttranslational activity regulation of a key glycolytic enzyme
Source: Royal Society of Chemistry journal article supplement (doi:10.1039/d5sc01024a), 2025-01-01
Supplement: d5sc01024a3.xlsx [file d5sc01024a3.xlsx]

## Sheet: Results
Significant	-LOG(P-value)	Difference	Protein IDs	Majority protein IDs	Protein names	Gene names	Mol. weight [kDa]	Score	Intensity	LFQ intensity pPyp-BP_1	LFQ intensity pPyp-BP_2	LFQ intensity pPyp-BP_3	LFQ intensity pPyp-BP_pHis_1	LFQ intensity pPyp-BP_pHis_2	LFQ intensity pPyp-BP_pHis_3	Significant pHis competed
+	2.96614	5.45058	P00562	P00562	Bifunctional aspartokinase/homoserine dehydrogenase 2;Aspartokinase;Homoserine dehydrogenase	metL	88.887	186.59	1231200000	24.5216	23.6433	23.4241	18.4011	NaN	18.4237	1
+	2.52612	4.35518	P13009	P13009	Methionine synthase	metH	136	323.31	1519300000	23.5585	22.5152	23.0116	18.9547	17.5142	19.5508	1
+	2.00015	4.2135	P27248	P27248	Aminomethyltransferase	gcvT	40.146	209.44	7564900000	27.1155	26.857	26.6418	21.7458	21.7605	24.4674	1
+	2.07844	3.66154	P04983	P04983	Ribose import ATP-binding protein RbsA	rbsA	55.041	323.31	623860000	23.9635	23.0414	23.7351	20.5443	NaN	19.2927	1
+	3.12306	3.62862	P0A796	P0A796	ATP-dependent 6-phosphofructokinase isozyme 1	pfkA	34.842	226.43	3283200000	25.5176	25.0268	25.3159	22.3767	21.4064	21.1912	1
+	2.33676	3.30497	P31120	P31120	Phosphoglucosamine mutase	glmM	47.543	323.31	9618800000	26.2033	26.6026	27.1055	23.2183	22.5029	24.2753	1
+	3.25902	3.21692	P05707	P05707	Sorbitol-6-phosphate 2-dehydrogenase	srlD	27.858	323.31	7734100000	27.179	27.36	27.2651	23.8354	23.645	24.6729	1
+	2.37479	3.20354	P0ABP8	P0ABP8	Purine nucleoside phosphorylase DeoD-type	deoD	25.95	323.31	21253000000	27.16	28.1455	28.1498	23.7743	25.2351	24.8352	1
+	3.03987	3.14359	P0A8F0	P0A8F0	Uracil phosphoribosyltransferase	upp	22.533	323.31	105730000000	29.7899	30.3679	29.3759	26.2815	26.8799	26.9415	1
+	1.77247	3.13095	P0A9A6	P0A9A6	Cell division protein FtsZ	ftsZ	40.323	323.31	3117100000	25.4811	25.1555	26.2332	23.4505	21.067	22.9595	1
+	2.18389	3.09902	P0AEU7	P0AEU7	Chaperone protein Skp	skp	17.688	219.46	585460000	23.2024	23.9532	23.6893	20.0358	NaN	20.9962	1
+	4.68154	3.07547	P0A9C5	P0A9C5	Glutamine synthetase	glnA	51.903	323.31	5629300000	26.3546	26.5021	26.4839	23.3376	NaN	23.4052	1
+	1.82955	3.03861	P45395	P45395	Arabinose 5-phosphate isomerase KdsD	kdsD	35.196	323.31	2469000000	24.6855	24.564	24.7909	20.8457	NaN	22.4373	1
+	2.84599	2.88003	P0AEG4	P0AEG4	Thiol:disulfide interchange protein DsbA	dsbA	23.104	120.64	1164400000	24.4251	24.8485	24.4105	NaN	21.9089	21.4538	1
+	3.62184	2.86576	P0ADG7	P0ADG7	Inosine-5-monophosphate dehydrogenase	guaB	52.022	323.31	3790600000	25.7996	25.3566	25.7245	22.5529	22.6005	23.13	1
	0.829377	2.59634	P60757	P60757	ATP phosphoribosyltransferase	hisG	33.366	135.38	857550000	24.6607	23.9021	24.246	19.9157	NaN	23.4308	0
+	1.9646	2.4765	P00961	P00961	Glycine--tRNA ligase beta subunit	glyS	76.812	323.31	2260900000	23.8537	23.713	24.7617	21.162	21.2208	22.5162	1
+	1.94655	2.46379	P0A9M0	P0A9M0	Lon protease	lon	87.437	134	935200000	24.3045	23.2093	23.4633	NaN	21.0499	21.3406	1
+	1.98748	2.40416	P04805	P04805	Glutamate--tRNA ligase	gltX	53.815	278.86	2639200000	26.8702	25.3577	25.6537	23.2432	23.3729	24.053	1
+	1.90325	2.40228	P12758	P12758	Uridine phosphorylase	udp	27.159	323.31	4655600000	25.3544	26.3027	26.0305	23.8487	22.5435	24.0886	1
+	1.85031	2.35132	P0A8N5	P0A8N5	Lysine--tRNA ligase, heat inducible	lysU	57.826	323.31	5956400000	25.1736	26.0702	26.0117	23.9875	22.4383	23.7757	1
+	2.53892	2.25127	P08312	P08312	Phenylalanine--tRNA ligase alpha subunit	pheS	36.831	151.04	960570000	23.6502	23.4956	23.386	21.5124	20.5903	21.6753	1
+	2.13996	2.23722	P0A850	P0A850	Trigger factor	tig	48.192	323.31	7788000000	25.9559	26.155	26.3475	24.4494	23.0678	24.2295	1
+	1.2965	2.23402	P25745	P25745	tRNA-specific 2-thiouridylase MnmA	mnmA	40.959	14.351	135120000	21.6832	21.4703	21.8397	NaN	20.3579	18.5029	0
+	1.84642	2.23342	P04079	P04079	GMP synthase [glutamine-hydrolyzing]	guaA	58.679	261.14	1185700000	24.1991	23.7853	23.9356	22.2835	NaN	21.1963	1
+	2.62103	2.17647	P08200	P08200	Isocitrate dehydrogenase [NADP]	icd	45.756	323.31	4043400000	25.5209	24.9661	25.0489	23.144	22.4848	23.3777	1
+	2.85366	2.08775	P0A7G6	P0A7G6	Protein RecA	recA	37.973	179.57	1168500000	24.598	24.2355	24.2031	22.1531	NaN	22.3625	1
+	2.90436	2.0057	P0AFG8	P0AFG8	Pyruvate dehydrogenase E1 component	aceE	99.667	323.31	55060000000	27.8186	28.2611	28.3885	25.9367	26.0144	26.5	1
+	1.6858	1.97766	P0AG30	P0AG30	Transcription termination factor Rho	rho	47.004	323.31	2815200000	24.7938	25.6318	24.5743	23.2166	NaN	22.828	1
+	1.67695	1.96964	P0AES6	P0AES6	DNA gyrase subunit B	gyrB	89.949	259.85	595450000	23.2626	23.4628	23.7314	20.5717	21.6256	22.3504	1
+	1.97885	1.95676	P0AEK2	P0AEK2	3-oxoacyl-[acyl-carrier-protein] reductase FabG	fabG	25.56	323.31	2514000000	25.4152	25.9182	24.9847	23.5548	24.0254	22.8676	1
+	1.2199	1.95316	P0AFF6	P0AFF6	Transcription termination/antitermination protein NusA	nusA	54.87	190.91	804450000	23.3148	22.7545	23.1447	22.5487	20.1197	20.6861	0
+	3.22734	1.95049	P0A6F5	P0A6F5	60 kDa chaperonin	groL	57.328	323.31	43189000000	28.3638	28.0357	28.3102	26.5621	26.3189	25.9772	1
+	1.14925	1.94064	P0AAI3	P0AAI3	ATP-dependent zinc metalloprotease FtsH	ftsH	70.707	154.24	959290000	23.4059	24.0659	23.4004	20.8163	NaN	22.5505	0
+	1.40774	1.92107	P0ABH9	P0ABH9	ATP-dependent Clp protease ATP-binding subunit ClpA	clpA	84.206	154.82	860890000	22.7865	22.4369	23.4291	21.6493	19.8413	21.3986	1
+	2.58662	1.88451	P0AGF6	P0AGF6	L-threonine dehydratase catabolic TdcB	tdcB	35.232	323.31	10353000000	26.3133	26.5086	26.3691	23.9719	24.6906	24.8749	1
+	2.88109	1.88222	P0ACR9	P0ACR9	Transcriptional repressor MprA	mprA	20.563	115.81	1365900000	24.7692	24.8918	24.4102	22.4527	22.896	23.0758	1
+	1.13064	1.85741	P02930	P02930	Outer membrane protein TolC	tolC	53.74	30.089	178920000	22.1819	21.8756	22.4415	19.4292	NaN	21.1887	0
+	2.95402	1.84701	P0ABQ0	P0ABQ0	Coenzyme A biosynthesis bifunctional protein CoaBC;Phosphopantothenoylcysteine decarboxylase;Phosphopantothenate--cysteine ligase	coaBC	43.438	113.94	543820000	23.1056	22.9161	23.2932	21.1952	NaN	21.3207	1
+	1.24374	1.8301	P23538	P23538	Phosphoenolpyruvate synthase	ppsA	87.434	170.97	629470000	22.1668	22.3399	23.5942	19.9469	20.9007	21.763	0
+	1.48068	1.80748	P0AES4	P0AES4	DNA gyrase subunit A	gyrA	96.962	220.98	587820000	23.8707	23.5582	23.7089	22.4729	20.7882	22.4544	1
+	1.70969	1.79799	P00393	P00393	NADH dehydrogenase	ndh	47.358	276.08	1913900000	24.4053	24.3087	24.7243	23.0186	21.7727	23.253	1
+	1.46005	1.76777	P0A9H7	P0A9H7	Cyclopropane-fatty-acyl-phospholipid synthase	cfa	43.909	31.991	186240000	22.6327	21.364	22.1069	20.1758	NaN	20.3577	1
+	3.18642	1.76745	P00959	P00959	Methionine--tRNA ligase	metG	76.254	121.25	914510000	23.2613	23.7496	23.3944	21.8933	21.5065	21.7031	1
+	1.5456	1.75227	P0A862	P0A862	Thiol peroxidase	tpx	17.835	270.93	2867500000	25.6447	25.5772	25.0744	24.1825	NaN	23.1772	1
+	2.56337	1.7486	P00452	P00452	Ribonucleoside-diphosphate reductase 1 subunit alpha	nrdA	85.774	323.31	3303100000	26.9953	26.3736	26.7206	24.9299	24.6202	25.2937	1
+	2.33377	1.74546	P0A7B5	P0A7B5	Glutamate 5-kinase	proB	39.056	236.22	1380100000	23.7831	23.5232	23.368	21.9105	21.2855	22.2419	1
+	1.64131	1.72552	P0A6H1	P0A6H1	ATP-dependent Clp protease ATP-binding subunit ClpX	clpX	46.355	151.49	580110000	22.6453	23.1897	23.8947	21.9997	20.9244	21.629	1
+	1.85248	1.69119	P39377	P39377	Isoaspartyl dipeptidase	iadA	41.083	19.267	105270000	20.6212	20.5994	21.2254	19.3819	NaN	18.8664	1
+	4.58965	1.66241	P0A6Q3	P0A6Q3	3-hydroxydecanoyl-[acyl-carrier-protein] dehydratase	fabA	18.969	77.179	3924000000	26.1055	26.288	26.2106	24.5069	24.4649	24.6451	1
+	2.25247	1.65779	P0A6S7	P0A6S7	Glycerol-3-phosphate dehydrogenase [NAD(P)+]	gpsA	36.361	71.51	185430000	21.7312	22.1028	22.0774	20.5432	20.0821	NaN	1
+	1.70153	1.642	P69441	P69441	Adenylate kinase	adk	23.586	130.03	1211600000	24.5663	23.7834	24.2634	22.2822	NaN	22.8425	1
+	1.81096	1.61509	P00962	P00962	Glutamine--tRNA ligase	glnS	63.477	202.27	1197700000	24.0709	23.4862	24.1434	22.4002	21.647	22.8079	1
	0.659874	1.57533	P11875	P11875	Arginine--tRNA ligase	argS	64.682	77.631	255630000	22.9904	20.793	21.979	21.1509	NaN	19.54	0
+	3.54059	1.56792	P21599	P21599	Pyruvate kinase II	pykA	51.357	323.31	6364000000	25.7579	25.7299	25.7645	24.0909	24.0152	24.4424	1
+	2.07604	1.51781	P0ADY1	P0ADY1	Peptidyl-prolyl cis-trans isomerase D	ppiD	68.149	126.74	723750000	22.5224	22.1135	22.8311	21.1466	20.5063	21.2606	1
+	2.14221	1.5109	P63284;A0A7H2C767	P63284;A0A7H2C767	Chaperone protein ClpB	clpB	95.584	323.31	4210500000	24.7384	24.1736	24.9775	23.2826	22.7586	23.3156	1
+	1.52362	1.50995	P08997	P08997	Malate synthase A	aceB	60.273	110.54	645110000	23.4576	22.874	22.5344	21.2174	NaN	21.6734	1
	0.94296	1.49905	P0AB89	P0AB89	Adenylosuccinate lyase	purB	51.542	39.096	278600000	21.88	21.0202	22.6174	19.9058	NaN	20.7745	0
+	1.62871	1.49538	P0A9C9	P0A9C9	Fructose-1,6-bisphosphatase 1 class 2	glpX	35.852	51.642	300950000	23.0361	22.2654	22.3226	20.8564	NaN	21.2356	1
+	3.36187	1.49062	P0A9M8	P0A9M8	Phosphate acetyltransferase	pta	77.171	323.31	12585000000	26.225	26.1949	26.3757	24.8727	24.5212	24.93	1
+	2.88222	1.48901	P00579	P00579	RNA polymerase sigma factor RpoD	rpoD	70.263	195.32	899970000	23.4995	23.3145	23.5942	21.857	21.7742	22.31	1
+	2.27337	1.47904	P0A836	P0A836	Succinyl-CoA ligase [ADP-forming] subunit beta	sucC	41.392	200.67	1042500000	23.8191	23.4779	23.2816	22.0586	22.0358	NaN	1
+	1.8832	1.46647	P00864	P00864	Phosphoenolpyruvate carboxylase	ppc	99.061	124.94	349930000	22.4986	21.698	22.4443	20.3115	20.8486	21.0814	1
+	1.95004	1.46212	P0A6B7	P0A6B7	Cysteine desulfurase IscS	iscS	45.089	101.08	739230000	23.2676	23.5617	23.9768	22.1715	21.6818	22.5665	1
+	1.4532	1.42092	P0A9P0	P0A9P0	Dihydrolipoyl dehydrogenase	lpdA	50.688	323.31	17395000000	26.5738	27.3131	27.2315	24.8436	26.0693	25.9427	1
+	2.08391	1.41215	P09373	P09373	Formate acetyltransferase 1	pflB	85.356	323.31	71058000000	28.3113	28.6179	28.7454	26.6402	27.2945	27.5035	1
+	1.52977	1.40502	P21889	P21889	Aspartate--tRNA ligase	aspS	65.913	162.54	911120000	23.0157	22.8263	23.7205	21.8376	21.1939	22.316	1
+	1.9355	1.39582	P0A8L1	P0A8L1	Serine--tRNA ligase	serS	48.413	323.31	2284000000	23.8604	24.7289	24.6463	23.0103	22.753	23.2849	1
+	1.82379	1.37409	P0ABH7	P0ABH7	Citrate synthase	gltA	48.014	323.31	38382000000	28.8616	28.9696	28.155	26.8589	27.4307	27.5743	1
+	1.2688	1.36548	P77395	P77395	Uncharacterized protein YbbN	ybbN	31.791	8.135	98396000	21.6808	21.4058	21.6506	20.7876	19.6396	NaN	0
+	1.27641	1.34413	P07118	P07118	Valine--tRNA ligase	valS	108.19	284.61	1778200000	25.0564	24.0241	24.699	23.8537	22.519	23.3744	0
	0.837789	1.31097	P0ADG4	P0ADG4	Inositol-1-monophosphatase	suhB	29.172	102.51	562600000	23.3023	22.9222	22.9197	22.6803	20.3351	22.1959	0
	1.01982	1.30138	P0DTT0	P0DTT0			67.355	135.48	321130000	22.7463	22.785	21.7348	22.0989	20.5675	20.6956	0
+	1.5233	1.29459	P37617	P37617	Lead, cadmium, zinc and mercury-transporting ATPase	zntA	76.839	55.317	338380000	21.9578	21.581	22.1814	20.2858	NaN	20.9385	1
	1.14197	1.29388	P26646	P26646	Probable acrylyl-CoA reductase AcuI	acuI	34.723	320.85	2286900000	24.6419	25.5931	25.2364	23.4458	NaN	24.2807	0
+	1.91405	1.25361	P0AB77	P0AB77	2-amino-3-ketobutyrate coenzyme A ligase	kbl	43.117	80.676	608340000	23.6317	23.205	23.6837	22.0299	21.9864	22.7432	1
+	1.25479	1.22756	P0A9C0	P0A9C0	Anaerobic glycerol-3-phosphate dehydrogenase subunit A	glpA	58.958	188.42	1576100000	24.281	24.6266	24.4397	23.5416	22.3363	23.7867	0
	0.895036	1.21986	P0ABK5	P0ABK5	Cysteine synthase A	cysK	34.489	90.55	987340000	23.6562	23.4706	23.9931	21.9673	23.7155	21.7775	0
	0.399652	1.2195	P29745	P29745	Peptidase T	pepT	44.923	19.421	114830000	21.6581	20.1498	20.841	21.1483	NaN	18.1786	0
+	1.60255	1.18967	P31663	P31663	Pantothenate synthetase	panC	31.597	20.377	159880000	20.8461	21.5485	21.4471	NaN	20.0485	20.1333	1
+	1.74212	1.18529	P09394	P09394	Glycerophosphoryl diester phosphodiesterase	glpQ	40.843	61.737	229200000	21.9653	22.4337	22.3177	NaN	21.2869	20.8203	1
	0.996841	1.1771	P0AFG6	P0AFG6	Dihydrolipoyllysine-residue succinyltransferase component of 2-oxoglutarate dehydrogenase complex	sucB	44.011	57.93	507160000	22.9903	22.4817	23.2054	22.7365	21.2121	21.1975	0
+	1.27547	1.16905	P08201	P08201	Nitrite reductase (NADH) large subunit	nirB	93.12	34.932	136590000	21.6349	20.9858	20.9481	19.6952	20.3459	NaN	0
+	2.88793	1.16245	P08839	P08839	Phosphoenolpyruvate-protein phosphotransferase	ptsI	63.561	321.41	3269000000	24.6237	24.4445	24.5328	23.6253	23.1658	23.3225	1
+	2.34287	1.15731	P60785	P60785	Elongation factor 4	lepA	66.57	102.42	675910000	23.5267	23.3731	23.3689	22.3809	21.8861	22.5297	1
+	2.51347	1.11789	P76658	P76658	Bifunctional protein HldE;D-beta-D-heptose 7-phosphate kinase;D-beta-D-heptose 1-phosphate adenylyltransferase	hldE	51.05	156.68	426160000	22.3331	22.5986	22.8748	21.5733	21.3289	21.5507	1
	0.706271	1.1165	P0A9H3	P0A9H3	Lysine decarboxylase, inducible	cadA	81.259	323.31	2770200000	24.6564	23.9105	25.0956	23.4458	22.3369	24.5303	0
	0.720248	1.0476	P35340	P35340	Alkyl hydroperoxide reductase subunit F	ahpF	56.176	48.652	381080000	22.4677	22.4174	21.906	NaN	20.4424	21.9898	0
+	2.59849	1.02357	P0A6Z3	P0A6Z3	Chaperone protein HtpG	htpG	71.422	159.93	1188700000	23.3373	23.1901	23.5473	22.4057	22.4811	22.1172	1
+	1.3004	1.01391	P27306	P27306	Soluble pyridine nucleotide transhydrogenase	sthA	51.56	41.263	250230000	22.4309	21.3377	21.4273	20.9186	20.5739	20.6616	1
	0.839027	1.00925	P0ABB4	P0ABB4	ATP synthase subunit beta	atpD	50.325	323.31	5452800000	24.1579	25.4106	25.6143	23.4284	24.217	24.5097	0
	0.730183	1.00881	P03841	P03841	Maltose operon periplasmic protein	malM	31.943	10.036	79276000	20.7046	20.3567	21.5004	20.1843	18.7972	20.5537	0
	0.831565	1.00269	P17952	P17952	UDP-N-acetylmuramate--L-alanine ligase	murC	53.625	24.945	182140000	22.1868	21.161	22.1506	NaN	20.4547	21.2055	0
	0.450035	0.993811	P0A7U7	P0A7U7	30S ribosomal protein S20	rpsT	9.6843	14.51	712780000	24.4847	24.3058	24.5641	24.6718	22.2436	NaN	0
	0.489362	0.965793	P0A7R5	P0A7R5	30S ribosomal protein S10	rpsJ	11.735	100.06	10768000000	26.8457	28.5547	27.1802	26.6873	27.6745	25.3213	0
	1.13216	0.94303	P07813	P07813	Leucine--tRNA ligase	leuS	97.233	202.17	582540000	22.6939	22.5586	23.1355	22.3533	21.1767	22.0289	0
+	1.75054	0.929858	P0A817	P0A817	S-adenosylmethionine synthase	metK	41.951	85.418	598130000	22.9368	22.5921	22.8907	21.4768	21.9465	22.2066	0
+	1.38101	0.926943	P10408	P10408	Protein translocase subunit SecA	secA	102.02	146.11	741730000	22.986	22.6444	23.5158	22.2414	22.3634	21.7606	0
+	1.85973	0.920061	P0A9W3	P0A9W3	Energy-dependent translational throttle protein EttA	ettA	62.442	95.409	876130000	23.3178	23.0879	23.2819	22.2254	21.9987	22.7033	0
	1.10855	0.913586	P0C8J6	P0C8J6	D-tagatose-1,6-bisphosphate aldolase subunit GatY	gatY	30.812	94.303	6060900000	25.8308	26.323	26.6109	24.8428	25.2611	25.92	0
+	1.408	0.910061	P22523	P22523	Chromosome partition protein MukB	mukB	170.23	84.999	346420000	21.7288	21.0068	21.4546	20.656	20.0589	20.7451	0
+	1.36718	0.876025	P0DMC7	P0DMC7	Transcriptional regulatory protein RcsB	rcsB	23.67	13.275	327900000	22.7189	22.741	23.2559	NaN	21.8613	22.1972	0
	0.717685	0.820796	P0A9S5	P0A9S5	Glycerol dehydrogenase	gldA	38.712	266.64	620460000	22.9722	23.6346	23.3415	21.93	NaN	23.0606	0
	1.30473	0.79992	P20083	P20083	DNA topoisomerase 4 subunit B	parE	70.243	70.383	141780000	21.5892	21.1086	21.518	20.819	NaN	20.3916	0
+	1.78403	0.785411	P30744	P30744	L-serine dehydratase 2	sdaB	48.752	163.22	1203200000	24.4103	24.0059	24.1029	23.4328	NaN	23.3425	0
+	1.75649	0.778406	P0CE48;P0CE47	P0CE48;P0CE47	Elongation factor Tu 2;Elongation factor Tu 1	tufB;tufA	43.313	323.31	61584000000	29.3949	29.5739	29.5171	28.4288	29.0818	28.6401	0
	0.516154	0.776723	P0AEZ3	P0AEZ3	Septum site-determining protein MinD	minD	29.614	66.269	557040000	22.1396	23.3198	23.3677	22.643	NaN	21.6882	0
	0.857335	0.749769	P0ABB0	P0ABB0	ATP synthase subunit alpha	atpA	55.221	319.92	2022400000	24.5256	24.2408	24.2336	24.0802	22.8033	23.8673	0
	0.649191	0.749719	P00561	P00561	Bifunctional aspartokinase/homoserine dehydrogenase 1;Aspartokinase;Homoserine dehydrogenase	thrA	89.119	33.56	121470000	21.6464	20.4219	20.4303	20.7083	19.6032	19.9379	0
	0.484117	0.73929	P13033	P13033	Anaerobic glycerol-3-phosphate dehydrogenase subunit B	glpB	45.357	112.42	699390000	22.6136	23.6867	23.5913	21.9485	NaN	23.1673	0
+	2.20423	0.730656	P10384	P10384	Long-chain fatty acid transport protein	fadL	48.541	29.507	178460000	22.356	22.2511	22.4771	21.5447	NaN	21.7168	0
	0.628164	0.712054	P0ABU2	P0ABU2	Ribosome-binding ATPase YchF	ychF	39.667	46.299	468260000	22.9055	22.0364	22.8268	22.3082	NaN	21.4468	0
	0.885516	0.704342	P0A7A2	P0A7A2	Probable phosphoglycerate mutase GpmB	gpmB	24.065	14.466	170410000	22.0495	21.9673	22.0591	20.5836	21.6478	21.7315	0
	1.13567	0.70272	P60716	P60716	Lipoyl synthase	lipA	36.071	27.015	246460000	22.5886	22.507	22.5579	21.503	NaN	22.1939	0
	1.12991	0.701689	P0A9Q5	P0A9Q5	Acetyl-coenzyme A carboxylase carboxyl transferase subunit beta	accD	33.322	69.181	1222100000	24.5374	23.9411	24.3301	23.9856	23.1764	23.5414	0
+	1.89567	0.688162	P0A715	P0A715	2-dehydro-3-deoxyphosphooctonate aldolase	kdsA	30.832	59.075	492240000	22.7192	22.4056	22.3834	21.8167	21.6091	22.018	0
	0.86246	0.687251	P0A8D0	P0A8D0	Transcriptional repressor NrdR	nrdR	17.229	14.293	72198000	21.1752	21.0459	21.0527	NaN	20.8557	19.9523	0
	0.864169	0.685478	P0A7Z4	P0A7Z4	DNA-directed RNA polymerase subunit alpha	rpoA	36.511	97.386	1120600000	24.4284	24.215	24.5423	24.2535	23.8366	23.0392	0
	0.80682	0.664654	P0A8J8	P0A8J8	ATP-dependent RNA helicase RhlB	rhlB	47.125	14.404	51420000	20.6835	20.7601	20.4148	20.3919	NaN	19.5177	0
	1.12098	0.657153	P0A825	P0A825	Serine hydroxymethyltransferase	glyA	45.316	323.31	1485600000	24.6724	24.5672	24.4533	23.3716	24.2048	24.1451	0
	0.239113	0.656784	P0AEI1	P0AEI1	tRNA-2-methylthio-N(6)-dimethylallyladenosine synthase	miaB	53.662	45.581	189940000	22.543	20.8003	22.0177	22.2221	NaN	20.0383	0
	0.819649	0.639233	P37759	P37759	dTDP-glucose 4,6-dehydratase 1	rfbB	40.558	15.151	60322000	20.2142	21.0451	20.6022	20.1482	NaN	19.8143	0
	1.37955	0.63182	P45523	P45523	FKBP-type peptidyl-prolyl cis-trans isomerase FkpA	fkpA	28.882	17.171	83877000	21.2956	21.0205	21.3821	NaN	20.7611	20.4407	0
	0.128047	0.618095	P0ADC1	P0ADC1	LPS-assembly lipoprotein LptE	lptE	21.356	5.3281	1054500000	26.059	21.8148	25.5672	23.8061	NaN	23.9184	0
	0.645322	0.597144	P76535	P76535	N-acetylmuramic acid 6-phosphate etherase	murQ	31.22	323.31	5512500000	25.5855	26.3316	25.7407	24.7447	25.1773	25.9444	0
	0.882512	0.577379	P0A7D4	P0A7D4	Adenylosuccinate synthetase	purA	47.344	323.31	1030200000	23.5687	23.6242	23.8866	23.609	23.1288	22.6096	0
	0.888387	0.56743	P0A6P1	P0A6P1	Elongation factor Ts	tsf	30.423	323.31	14287000000	26.754	26.6858	26.5687	25.5894	26.6031	26.1137	0
	1.24738	0.541683	P0A996	P0A996	Anaerobic glycerol-3-phosphate dehydrogenase subunit C	glpC	44.108	68.91	284570000	22.3878	21.9449	22.2056	21.8047	21.3214	21.7872	0
	0.582022	0.533941	P06149	P06149	D-lactate dehydrogenase	dld	64.612	14.376	107230000	20.9301	20.5387	21.037	19.6003	20.3978	20.9059	0
	1.26943	0.514399	P0A6H5	P0A6H5	ATP-dependent protease ATPase subunit HslU	hslU	49.593	139.67	1234800000	24.2754	23.7306	23.7347	23.3485	23.3333	23.5156	0
	0.470528	0.511999	P07650	P07650	Thymidine phosphorylase	deoA	47.207	323.31	7353800000	24.838	25.3108	25.3112	24.099	24.3031	25.5218	0
	1.55537	0.462775	P36683	P36683	Aconitate hydratase B	acnB	93.497	233.47	981130000	23.3307	23.0113	23.1676	22.9021	22.562	22.6572	0
	0.362068	0.462611	P0ACJ8	P0ACJ8	cAMP-activated global transcriptional regulator CRP	crp	23.64	126.42	1642900000	24.0452	24.8447	24.8185	23.5879	NaN	24.6257	0
	1.03891	0.461143	P0A7E5	P0A7E5	CTP synthase	pyrG	60.373	172.08	1641200000	25.1393	24.5897	24.6176	24.4417	24.1069	24.4145	0
	0.116267	0.434132	P0AG27	P0AG27	Uncharacterized protein YibN	yibN	15.596	35.578	108040000	21.5289	NaN	21.44	22.32	19.7807	NaN	0
	0.576627	0.424929	P0A799	P0A799	Phosphoglycerate kinase	pgk	41.118	323.31	6385200000	25.8537	25.9714	26.1011	25.2161	26.1909	25.2444	0
	0.460319	0.413879	P00956	P00956	Isoleucine--tRNA ligase	ileS	104.3	161.16	623660000	21.9829	21.9406	22.4484	21.0748	21.763	22.2925	0
	0.515471	0.399033	P0A6V8	P0A6V8	Glucokinase	glk	34.723	45.907	145530000	21.8173	21.1211	21.9101	21.2656	NaN	21.1687	0
	0.177511	0.397504	P0A940	P0A940	Outer membrane protein assembly factor BamA	bamA	90.552	68.514	249540000	20.963	21.3978	22.1758	22.5447	20.9074	19.8919	0
	0.314581	0.397144	P69910;P69908	P69910;P69908	Glutamate decarboxylase beta;Glutamate decarboxylase alpha	gadB;gadA	52.668	97.418	713640000	23.6423	22.4181	23.5002	22.7621	NaN	22.8173	0
	1.66539	0.391432	P0A870	P0A870	Transaldolase B	talB	35.219	233.9	2576000000	24.5637	24.2994	24.4888	24.0871	23.922	24.1686	0
	0.582908	0.388213	P00363	P00363	Fumarate reductase flavoprotein subunit	frdA	65.971	110.77	1271400000	23.7627	23.4786	23.9838	22.9209	23.3246	23.8151	0
	0.687029	0.380003	P0A858	P0A858	Triosephosphate isomerase	tpiA	26.972	188.87	850950000	23.386	23.6635	23.7239	22.7564	23.4879	23.3892	0
	1.46504	0.373296	P02931	P02931	Outer membrane protein F	ompF	39.333	67.166	171860000	21.647	21.7255	21.6374	21.1294	21.2438	21.5167	0
	0.558044	0.372719	P0A855	P0A855	Protein TolB	tolB	45.955	14.176	94334000	20.8877	20.6922	21.1495	NaN	20.8362	20.2379	0
	0.902358	0.362525	P0AC53	P0AC53	Glucose-6-phosphate 1-dehydrogenase;Extracellular death factor	zwf	55.704	25.903	123010000	21.2008	21.3172	21.3835	21.0374	20.5892	21.1873	0
	0.308499	0.348693	P0AB28	P0AB28	Uncharacterized protein YceD	yceD	19.315	98.742	741210000	23.7187	23.9251	22.931	23.1596	22.5829	23.7863	0
	0.693167	0.343896	P0A853	P0A853	Tryptophanase	tnaA	52.773	323.31	120490000000	29.3105	29.6327	29.7079	28.8733	29.5323	29.2138	0
	0.21066	0.329344	P21513	P21513	Ribonuclease E	rne	118.2	284.12	603280000	22.1881	21.9876	22.9294	22.7586	20.9958	22.3627	0
	0.745785	0.32738	P0AE06	P0AE06	Multidrug efflux pump subunit AcrA	acrA	42.196	42.908	189180000	21.217	21.1011	21.4845	20.6259	21.0022	21.1925	0
	0.309053	0.273066	P0A8T7	P0A8T7	DNA-directed RNA polymerase subunit beta	rpoC	155.16	323.31	6809000000	25.2462	25.7574	25.5252	25.1738	24.7011	25.8346	0
	0.117201	0.259762	P0A998	P0A998	Bacterial non-heme ferritin	ftnA	19.424	242.09	2207200000	23.7568	25.4992	25.6658	NaN	24.6796	24.7487	0
	0.631781	0.259536	P68066	P68066	Autonomous glycyl radical cofactor	grcA	14.284	323.31	10332000000	27.0914	26.6615	26.9547	26.6127	26.4262	26.8902	0
	0.429326	0.255006	P0A8M3	P0A8M3	Threonine--tRNA ligase	thrS	74.013	110.35	451980000	22.6486	22.3421	22.3177	22.6154	21.8297	22.0982	0
	1.29594	0.208342	P0AD61	P0AD61	Pyruvate kinase I	pykF	50.729	323.31	3860800000	24.6885	24.645	24.8845	24.5378	24.5546	24.5006	0
	0.654395	0.207839	P04825	P04825	Aminopeptidase N	pepN	98.918	66.009	417780000	22.798	22.4404	22.5964	22.5604	22.2187	22.4321	0
	1.06749	0.200092	P00957	P00957	Alanine--tRNA ligase	alaS	96.031	201.82	1402200000	23.2823	23.3903	23.5031	23.1035	23.1636	23.3084	0
	0.372106	0.194808	P0AEX9	P0AEX9	Maltose-binding periplasmic protein	malE	43.387	19.057	116130000	21.7468	21.6048	21.7993	21.813	21.1109	21.6426	0
	0.138319	0.185691	P0A6A3	P0A6A3	Acetate kinase	ackA	43.29	321.06	5140100000	25.0174	26.1846	25.9826	24.8598	25.8927	25.875	0
	0.0874992	0.178667	P25553	P25553	Lactaldehyde dehydrogenase	aldA	52.272	124.98	296790000	22.4514	21.4594	20.6096	21.5671	NaN	21.0891	0
	0.276888	0.163018	P60752	P60752	Lipid A export ATP-binding/permease protein MsbA	msbA	64.46	102.27	185410000	21.2741	21.0712	21.6664	21.2306	NaN	21.1178	0
	0.0910321	0.147218	P0AFG3	P0AFG3	2-oxoglutarate dehydrogenase E1 component	sucA	105.06	35.852	169360000	21.4479	20.9484	21.2586	21.6016	19.9567	21.6548	0
	0.189904	0.146957	P0AEE5	P0AEE5	D-galactose-binding periplasmic protein	mglB	35.712	55.017	119980000	21.4718	21.0881	20.7774	20.9888	21.3303	20.5773	0
	0.213609	0.134335	P07012	P07012	Peptide chain release factor 2	prfB	41.25	31.933	219970000	21.8339	21.8695	21.74	22.1242	21.2953	21.6209	0
	0.0525618	0.132198	P24182	P24182	Biotin carboxylase	accC	49.32	141.35	595640000	23.0147	22.5844	22.2846	23.7008	20.8813	22.9051	0
	0.0481853	0.0956586	P27302	P27302	Transketolase 1	tktA	72.211	66.522	310540000	22.2058	21.5693	22.0856	22.8985	22.0174	20.6578	0
	0.0797446	0.0838025	P0A705	P0A705	Translation initiation factor IF-2	infB	97.349	323.31	1371000000	23.5547	24.4235	24.1396	24.3303	23.4353	24.1009	0
	0.0890576	0.061154	P0A9Q7	P0A9Q7	Aldehyde-alcohol dehydrogenase;Alcohol dehydrogenase;Acetaldehyde dehydrogenase [acetylating];Pyruvate-formate-lyase deactivase	adhE	96.126	323.31	12184000000	25.9356	25.9903	26.3697	25.7615	25.9185	26.4321	0
	0.0840883	0.0607262	P0AC23	P0AC23	Probable formate transporter 1	focA	30.99	33.628	596890000	23.9865	23.6688	24.0724	NaN	23.5885	24.1085	0
	0.0422757	0.0550232	P0A6F3	P0A6F3	Glycerol kinase	glpK	56.23	323.31	3104800000	24.2611	25.4668	24.4544	24.8701	24.9495	24.1976	0
	0.0635311	0.0518093	P00803	P00803	Signal peptidase I	lepB	35.96	14.481	55286000	20.8471	20.3572	20.9784	20.2795	21.0014	20.7464	0
	0.0682673	0.0475938	P0ABA6	P0ABA6	ATP synthase gamma chain	atpG	31.577	296.42	883940000	23.0711	23.4233	23.3253	23.4889	NaN	22.9624	0
	0.177454	0.0458692	P31554	P31554	LPS-assembly protein LptD	lptD	89.67	53.817	144010000	20.726	20.6635	20.9232	20.6736	20.6583	20.8432	0
	0.0685726	0.0330264	P39160	P39160	D-mannonate oxidoreductase	uxuB	53.58	20.173	120790000	21.6013	21.2941	21.6038	21.3358	NaN	21.5976	0
	0.0944819	0.0320759	P00350	P00350	6-phosphogluconate dehydrogenase, decarboxylating	gnd	51.481	323.31	1544900000	23.9888	24.2498	24.0719	24.0261	23.9366	24.2516	0
	0.00506777	0.00215276	P0A6L0	P0A6L0	Deoxyribose-phosphate aldolase	deoC	27.733	29.677	321300000	23.2855	23.0621	22.9452	22.9016	23.1969	23.1878	0
	0.0373294	-0.0136204	P0A7W1	P0A7W1	30S ribosomal protein S5	rpsE	17.603	323.31	6062200000	25.7724	26.0937	26.0239	25.832	26.0895	26.0093	0
	0.0148415	-0.0158609	P08194	P08194	Glycerol-3-phosphate transporter	glpT	50.31	313.68	2470400000	24.9643	25.6127	25.4561	25.8414	24.8236	25.4157	0
	0.0470358	-0.0308434	P09323	P09323	PTS system N-acetylglucosamine-specific EIICBA component;N-acetylglucosamine permease IIC component;N-acetylglucosamine-specific phosphotransferase enzyme IIB component;N-acetylglucosamine-specific phosphotransferase enzyme IIA component	nagE	68.346	34.396	201320000	21.8319	21.8269	22.3403	22.0224	NaN	22.0387	0
	0.0327637	-0.0491041	P0ACE0	P0ACE0	Hydrogenase-2 large chain	hybC	62.49	173.15	861970000	22.9448	24.1806	23.6073	23.6793	22.9815	24.2193	0
	0.083704	-0.0523942	P0ABA0	P0ABA0	ATP synthase subunit b	atpF	17.264	62.169	637760000	23.7157	23.2663	23.4298	23.2397	23.4765	23.8527	0
	0.0415813	-0.056804	P0A8M0	P0A8M0	Asparagine--tRNA ligase	asnS	52.57	210.05	897080000	23.4672	23.2521	22.4761	23.4415	NaN	22.8024	0
	0.192964	-0.0577501	P06959	P06959	Dihydrolipoyllysine-residue acetyltransferase component of pyruvate dehydrogenase complex	aceF	66.095	323.31	14343000000	26.1537	26.0766	26.2782	26.1092	26.1494	26.4231	0
	0.0574396	-0.0747334	P21888	P21888	Cysteine--tRNA ligase	cysS	52.202	24.486	133990000	21.3515	20.452	20.2501	20.8348	NaN	20.6838	0
	0.0570096	-0.0777569	P0A7Z0	P0A7Z0	Ribose-5-phosphate isomerase A	rpiA	22.86	10.845	79948000	21.7336	20.8663	NaN	21.4709	NaN	21.2844	0
	0.154694	-0.111523	P33602	P33602	NADH-quinone oxidoreductase subunit G	nuoG	100.3	24.944	149080000	21.0882	21.5408	21.3127	20.9542	21.6786	21.6434	0
	0.194628	-0.121449	P62620	P62620	4-hydroxy-3-methylbut-2-en-1-yl diphosphate synthase (flavodoxin)	ispG	40.683	43.46	149620000	21.9625	21.3593	21.7628	21.8768	NaN	21.7559	0
	0.679032	-0.151948	P0A6Y5	P0A6Y5	33 kDa chaperonin	hslO	32.534	29.104	120770000	21.079	21.2737	21.0733	21.236	NaN	21.3519	0
	0.225385	-0.166884	P37440	P37440	Oxidoreductase UcpA	ucpA	27.85	43.039	173910000	21.737	21.4949	20.8688	21.5633	21.2956	21.7425	0
	0.139891	-0.168521	P0ADE8	P0ADE8	tRNA-modifying protein YgfZ	ygfZ	36.094	19.533	127910000	21.1871	NaN	21.5414	21.9092	NaN	21.1564	0
	0.247818	-0.171598	Q46868	Q46868	Uncharacterized protein YqiC	yqiC	11.276	17.287	114890000	21.3322	20.5988	21.1813	21.4917	20.9436	21.1917	0
	0.422142	-0.18536	P09148	P09148	Galactose-1-phosphate uridylyltransferase	galT	39.645	11.233	26302000	19.7685	19.5366	NaN	NaN	19.9555	19.7203	0
	0.084589	-0.18589	P00954	P00954	Tryptophan--tRNA ligase	trpS	37.437	323.31	4546000000	25.6143	26.5289	25.677	24.7232	26.5418	27.113	0
	0.11461	-0.203003	P0ABC7	P0ABC7	Modulator of FtsH protease HflK	hflK	45.544	41.703	192090000	21.4872	20.7704	21.0002	22.4954	20.5625	20.8089	0
	0.372983	-0.254669	P0AG67	P0AG67	30S ribosomal protein S1	rpsA	61.157	323.31	6778000000	25.2206	25.8556	25.857	25.5437	26.2036	25.95	0
	0.298612	-0.266144	P00805	P00805	L-asparaginase 2	ansB	36.85	61.21	243610000	22.2198	21.8699	21.7297	22.7661	22.2319	21.6198	0
	0.124069	-0.267472	P0A9D8	P0A9D8	2,3,4,5-tetrahydropyridine-2,6-dicarboxylate N-succinyltransferase	dapD	29.892	274.48	550160000	22.7945	21.5954	22.2215	23.8493	22.0671	21.4974	0
	0.312372	-0.276222	P37689	P37689	2,3-bisphosphoglycerate-independent phosphoglycerate mutase	gpmI	56.193	98.209	407230000	22.2839	22.7428	22.6236	22.4223	NaN	23.2304	0
	0.394165	-0.278211	P21499	P21499	Ribonuclease R	rnr	92.108	35.463	148410000	21.0674	20.3157	20.8297	20.9965	NaN	21.0352	0
	0.255839	-0.299121	P31808	P31808	Uncharacterized oxidoreductase YciK	yciK	27.933	16.765	45762000	19.6957	19.6262	20.3123	20.6504	NaN	19.7039	0
	0.398725	-0.307942	P0AG90	P0AG90	Protein translocase subunit SecD	secD	66.631	34.758	178210000	21.2645	20.8438	21.6035	22.0138	21.2076	21.4142	0
	0.358419	-0.330773	Q46856	Q46856	Alcohol dehydrogenase YqhD	yqhD	42.097	15.566	92230000	20.7916	20.9981	21.5173	22.0225	20.9307	21.3461	0
	0.428897	-0.330838	P37626	P37626	Uncharacterized protein YhiI	yhiI	38.828	14.863	32967000	19.171	18.8113	19.6302	19.4271	NaN	19.6429	0
	0.127601	-0.331713	P13029	P13029	Catalase-peroxidase	katG	80.023	99.988	340500000	21.8752	21.1915	22.3942	22.317	20.5391	23.6	0
	0.151422	-0.340367	P0AAC8	P0AAC8	Iron-binding protein IscA	iscA	11.556	11.539	53220000	20.8825	19.0499	21.016	20.673	20.6401	NaN	0
	0.531066	-0.351437	P0A7V0	P0A7V0	30S ribosomal protein S2	rpsB	26.743	291.66	5075400000	26.1951	26.3296	26.4927	27.1414	26.1819	26.7484	0
	0.388783	-0.355118	P00490	P00490	Maltodextrin phosphorylase	malP	90.521	62.056	305830000	21.814	21.6723	21.9704	22.8586	21.5654	22.098	0
	0.181	-0.357894	P06996	P06996	Outer membrane protein C	ompC	40.368	125.12	467290000	22.9944	22.3729	22.5014	23.909	NaN	22.0526	0
	0.386392	-0.372869	P76055	P76055	tRNA 2-thiocytidine biosynthesis protein TtcA	ttcA	35.561	9.5004	52209000	19.978	20.6551	20.7661	21.1449	NaN	20.5336	0
	0.360703	-0.385066	P07395	P07395	Phenylalanine--tRNA ligase beta subunit	pheT	87.377	153.69	600020000	22.907	21.7725	22.4574	22.8371	NaN	22.6909	0
	0.618893	-0.397145	P29131	P29131	Cell division protein FtsN	ftsN	35.793	18.305	63414000	19.6781	19.409	19.7985	19.72	NaN	20.3315	0
	1.1655	-0.40468	P33136	P33136	Glucans biosynthesis protein G	mdoG	57.912	16.418	122390000	21.0645	20.9021	21.0569	21.6269	21.4978	21.1127	0
	0.544549	-0.406075	P16659	P16659	Proline--tRNA ligase	proS	63.692	255.66	479230000	22.85	23.1457	22.9127	24.0086	23.0909	23.0272	0
	0.347569	-0.408813	P0A722	P0A722	Acyl-[acyl-carrier-protein]--UDP-N-acetylglucosamine O-acyltransferase	lpxA	28.08	323.31	573400000	23.0965	23.5836	22.8332	23.0452	23.2517	24.4428	0
	0.283483	-0.4203	P0A805	P0A805	Ribosome-recycling factor	frr	20.638	135.49	462850000	23.5894	23.1857	22.877	24.2126	22.5161	24.1843	0
	0.829425	-0.440842	P0A910	P0A910	Outer membrane protein A	ompA	37.2	323.31	10387000000	25.8058	26.3425	26.603	26.6396	26.8393	26.5949	0
	1.70662	-0.442696	P0A9B2	P0A9B2	Glyceraldehyde-3-phosphate dehydrogenase A	gapA	35.532	323.31	9282900000	26.4512	26.7025	26.5799	27.1976	26.9783	26.8859	0
	0.469191	-0.448606	P0AGD3	P0AGD3	Superoxide dismutase [Fe]	sodB	21.265	25.335	471220000	23.9698	23.2313	23.3174	23.6099	NaN	24.2997	0
	1.65663	-0.458245	P0AB71	P0AB71	Fructose-bisphosphate aldolase class 2	fbaA	39.147	280.31	1208500000	23.9938	23.8057	23.8754	24.4969	24.1267	24.426	0
	0.754717	-0.465511	P0AAD6	P0AAD6	Serine transporter	sdaC	46.906	38.954	475450000	23.3162	23.8784	23.8282	23.703	24.3931	24.3232	0
	0.173132	-0.48573	P0A7R9	P0A7R9	30S ribosomal protein S11	rpsK	13.845	106.15	932640000	24.0368	23.9954	24.008	25.561	22.3747	25.5617	0
	0.607929	-0.494905	P02358	P02358	30S ribosomal protein S6;30S ribosomal protein S6, fully modified isoform;30S ribosomal protein S6, non-modified isoform	rpsF	15.703	62.26	1365700000	25.4419	24.4994	24.4961	24.9653	25.6002	25.3567	0
	0.473528	-0.512224	P0A717	P0A717	Ribose-phosphate pyrophosphokinase	prs	34.218	323.31	6684900000	25.3399	26.4295	25.7874	25.6838	26.8157	26.5941	0
	0.418506	-0.512735	P0AC41	P0AC41	Succinate dehydrogenase flavoprotein subunit	sdhA	64.421	63.571	318390000	22.4902	21.4378	21.3689	22.9943	22.1148	21.7261	0
	0.787245	-0.526954	P25714	P25714	Membrane protein insertase YidC	yidC	61.525	53.792	243660000	21.2467	21.2773	21.7509	22.2125	NaN	21.6913	0
	0.726573	-0.527177	P33195	P33195	Glycine dehydrogenase (decarboxylating)	gcvP	104.38	161.63	611480000	23.2502	22.8288	22.5711	23.1748	NaN	23.6463	0
	1.2274	-0.547297	P37765	P37765	Ribosomal large subunit pseudouridine synthase B	rluB	32.711	16.558	41686000	NaN	20.7316	20.3864	21.2809	20.9261	21.1118	0
	0.792543	-0.551266	P0A8V2	P0A8V2	DNA-directed RNA polymerase subunit beta	rpoB	150.63	323.31	3803500000	24.4654	24.5037	24.6351	25.6744	24.5871	24.9965	0
	0.25485	-0.552563	P0ABZ6	P0ABZ6	Chaperone SurA	surA	47.283	141.01	527500000	23.2552	22.4015	23.1752	24.515	NaN	22.4781	0
	0.352219	-0.568429	P30859	P30859	Putative ABC transporter arginine-binding protein 2	artI	26.929	8.2166	26398000	19.2592	18.9462	19.0916	NaN	18.8135	20.5214	0
+	1.80128	-0.569946	P0ACC7	P0ACC7	Bifunctional protein GlmU;UDP-N-acetylglucosamine pyrophosphorylase;Glucosamine-1-phosphate N-acetyltransferase	glmU	49.19	45.024	147680000	20.9894	20.922	21.3332	21.7685	21.5575	21.6284	0
	1.4258	-0.585588	P19624	P19624	4-hydroxythreonine-4-phosphate dehydrogenase	pdxA	35.113	170.38	668160000	23.402	23.4656	23.2341	24.1374	NaN	23.7682	0
	1.35452	-0.593222	P0A6Y8	P0A6Y8	Chaperone protein DnaK	dnaK	69.114	323.31	4689400000	25.6984	25.8722	25.8547	26.0256	26.4874	26.6921	0
	0.902942	-0.609765	P0A7L0	P0A7L0	50S ribosomal protein L1	rplA	24.729	203.94	4308600000	25.8107	25.9358	26.2272	26.811	26.964	26.028	0
	0.51394	-0.628718	P0AGA2	P0AGA2	Protein translocase subunit SecY	secY	48.511	21.652	513660000	22.642	22.0272	23.3788	23.2013	NaN	23.4215	0
	0.987738	-0.62916	P31224	P31224	Multidrug efflux pump subunit AcrB	acrB	113.57	39.574	162220000	21.2034	21.8392	21.409	21.9491	NaN	22.2769	0
	0.352841	-0.650267	P76177	P76177	Protein YdgH	ydgH	33.903	27.229	127020000	20.422	19.8798	20.7042	21.8845	NaN	20.0868	0
+	1.54466	-0.656809	P0AAJ5	P0AAJ5	Formate dehydrogenase-O iron-sulfur subunit	fdoH	33.1	18.083	64483000	20.4682	20.3418	20.3541	20.7208	21.0292	21.3846	0
	0.599231	-0.657138	P0A6M8	P0A6M8	Elongation factor G	fusA	77.58	323.31	10610000000	24.9542	26.4253	25.5615	26.1631	26.7762	25.973	0
	0.781458	-0.723046	P06612	P06612	DNA topoisomerase 1	topA	97.349	24.264	82352000	20.6312	19.5731	20.0411	20.7701	NaN	20.8396	0
	0.451117	-0.756127	P0A725	P0A725	UDP-3-O-[3-hydroxymyristoyl] N-acetylglucosamine deacetylase	lpxC	33.956	16.115	120040000	21.8205	19.9884	20.8339	21.7747	NaN	21.4995	0
+	1.44694	-0.762406	P0A6T1	P0A6T1	Glucose-6-phosphate isomerase	pgi	61.529	77.242	377850000	22.5193	22.3225	22.5296	22.8171	23.6322	23.2093	0
	0.556029	-0.771298	P23843	P23843	Periplasmic oligopeptide-binding protein	oppA	60.898	49.675	151420000	21.6152	20.6362	20.9207	22.428	21.2293	NaN	0
	0.649077	-0.782856	P56580	P56580	Glucitol/sorbitol-specific phosphotransferase enzyme IIB component	srlE	33.332	32.49	83048000	21.1674	20.4794	20.0542	21.7473	NaN	20.9524	0
	0.630553	-0.795847	P0A7W7	P0A7W7	30S ribosomal protein S8	rpsH	14.126	66.654	1998500000	24.8013	25.8214	24.6772	25.386	26.7675	25.5339	0
+	1.42373	-0.811253	P0AFF2	P0AFF2	Nucleoside permease NupC	nupC	43.475	16.503	1216400000	25.4648	25.564	25.9059	25.9998	26.7197	26.649	0
+	2.10548	-0.820502	P62399	P62399	50S ribosomal protein L5	rplE	20.301	323.31	3440500000	24.6606	24.9317	24.8073	25.3535	25.8592	25.6484	0
	0.817511	-0.840431	P0A6A8	P0A6A8	Acyl carrier protein	acpP	8.6394	36.108	693040000	23.8306	23.9614	23.0174	24.1483	NaN	24.7388	0
	0.758051	-0.842372	P0AGJ9	P0AGJ9	Tyrosine--tRNA ligase	tyrS	47.526	129.81	311680000	22.7709	21.9584	22.5457	22.7869	NaN	23.748	0
	0.857658	-0.88481	P0ACF8	P0ACF8	DNA-binding protein H-NS	hns	15.539	181.73	611550000	24.1361	22.7686	23.0526	24.6013	24.2303	23.7801	0
	0.247856	-0.891355	P0ADZ0	P0ADZ0	50S ribosomal protein L23	rplW	11.199	62.678	178120000	21.4184	23.2082	NaN	24.1547	22.2547	NaN	0
	1.2079	-0.917715	P21507	P21507	ATP-dependent RNA helicase SrmB	srmB	49.914	20.04	99349000	20.509	20.7449	21.2103	21.9663	NaN	21.512	0
+	1.67082	-0.918119	P0A6P9	P0A6P9	Enolase	eno	45.654	323.31	4655100000	24.5109	25.1656	25.2099	25.706	25.8601	26.0746	0
	1.12183	-0.945801	P39396	P39396	Inner membrane protein YjiY	yjiY	77.323	69.339	422490000	23.1958	23.0296	23.3073	24.7768	23.4335	24.1598	0
+	1.70078	-0.948406	P0A6K6	P0A6K6	Phosphopentomutase	deoB	44.369	218.35	2189700000	24.1803	24.7583	24.6061	25.3681	25.2025	25.8194	0
	1.13454	-0.974644	P33937	P33937	Periplasmic nitrate reductase	napA	93.041	18.279	93159000	20.7914	20.2069	19.9461	21.3254	20.7225	21.8204	0
+	1.33878	-0.994687	P0A953	P0A953	3-oxoacyl-[acyl-carrier-protein] synthase 1	fabB	42.613	323.31	3721800000	24.9616	25.0829	25.2021	25.7829	26.756	25.6918	0
	1.20797	-0.998658	P32176	P32176	Formate dehydrogenase-O major subunit	fdoG	112.55	75.021	151160000	21.1308	21.0817	21.1164	22.5679	NaN	21.6487	0
	0.973845	-1.00386	P11557	P11557	Cell division protein DamX	damX	46.161	25.244	122290000	20.6952	20.4376	20.9326	22.2265	NaN	21.1581	0
+	1.76529	-1.00401	P0ABJ1	P0ABJ1	Cytochrome bo(3) ubiquinol oxidase subunit 2	cyoA	34.911	13.641	100800000	21.8387	NaN	21.9613	23.0224	NaN	22.7857	-1
+	1.67923	-1.01532	P0A7J7	P0A7J7	50S ribosomal protein L11	rplK	14.875	133.21	3423000000	26.5925	26.4607	25.8625	27.4761	27.4817	27.0039	-1
	0.682666	-1.02535	P63224	P63224	Phosphoheptose isomerase	gmhA	20.815	179.38	396390000	22.7116	23.542	22.927	23.3423	NaN	24.8288	0
	1.2155	-1.03474	P0A707	P0A707	Translation initiation factor IF-3;Translation initiation factor IF-3, N-terminally processed;Translation initiation factor IF-3S	infC	20.564	151.05	572880000	22.561	23.4292	23.1754	23.9323	NaN	24.2476	0
	1.11744	-1.04685	P16926	P16926	Cell shape-determining protein MreC	mreC	39.53	19.215	53816000	20.5713	20.8361	21.0315	22.3345	NaN	21.3851	0
	0.680258	-1.05395	P0AG51	P0AG51	50S ribosomal protein L30	rpmD	6.5417	31.459	601690000	24.3859	24.063	NaN	24.7254	NaN	25.8313	0
	0.909145	-1.10923	P0ADN2	P0ADN2	UPF0438 protein YifE	yifE	13.133	19.083	947810000	26.3669	27.4084	26.4522	NaN	28.2452	27.4583	0
+	1.58392	-1.12659	P61889	P61889	Malate dehydrogenase	mdh	32.337	290.46	4001500000	25.6075	25.1441	25.0546	26.8755	25.9123	26.3982	-1
+	1.64504	-1.12768	P0AEK4	P0AEK4	Enoyl-[acyl-carrier-protein] reductase [NADH] FabI	fabI	27.864	323.31	20738000000	27.8048	27.5253	27.7945	28.487	28.5895	29.4311	-1
	1.00639	-1.12779	P0A7J3	P0A7J3	50S ribosomal protein L10	rplJ	17.711	97.55	3482600000	24.8348	26.2506	25.1716	26.2451	27.1604	26.2349	0
	0.51285	-1.16064	P0A9G6	P0A9G6	Isocitrate lyase	aceA	47.521	30.828	355200000	23.0184	22.9062	22.1645	25.7123	23.3243	22.5344	0
	0.677953	-1.19744	P0AD49	P0AD49	Ribosome-associated inhibitor A	raiA	12.784	170.4	272030000	21.3599	23.1786	21.514	23.1594	NaN	23.2704	0
	0.659566	-1.20244	P02925	P02925	D-ribose-binding periplasmic protein	rbsB	30.95	323.31	2420400000	23.3058	25.5007	24.7961	24.985	26.7169	25.508	0
	0.716929	-1.21086	P62768	P62768	UPF0325 protein YaeH	yaeH	15.096	19.251	86929000	22.0577	20.4203	20.3557	22.2374	NaN	22.0735	0
	1.02377	-1.27579	P28248	P28248	Deoxycytidine triphosphate deaminase	dcd	21.249	9.48	70976000	19.875	19.5025	21.4071	21.5056	21.4683	21.638	0
+	1.85173	-1.28711	P02359	P02359	30S ribosomal protein S7	rpsG	20.019	235.49	1948300000	24.6671	24.2498	23.8808	25.7571	25.7677	25.1343	-1
+	1.42162	-1.29138	P0A7S3	P0A7S3	30S ribosomal protein S12	rpsL	13.737	29.966	2084000000	25.2297	25.1172	23.9566	25.9022	25.9924	26.2831	-1
	0.856149	-1.29544	P0AA10	P0AA10	50S ribosomal protein L13	rplM	16.018	125.45	850180000	23.0724	24.3312	23.0373	24.3158	NaN	25.2358	0
+	1.62556	-1.30424	P0C0V0	P0C0V0	Periplasmic serine endoprotease DegP	degP	49.354	323.31	790930000	21.904	23.0587	22.7997	23.723	24.0996	23.8526	-1
	0.504116	-1.41068	P68679	P68679	30S ribosomal protein S21	rpsU	8.4999	11.766	366380000	22.754	23.018	21.3724	25.0842	NaN	22.5001	0
+	1.23618	-1.4187	P0ADY3	P0ADY3	50S ribosomal protein L14	rplN	13.541	323.31	1057800000	23.8488	25.5278	24.1678	25.7799	26.2528	25.7678	0
	0.979763	-1.4256	P0A7R1	P0A7R1	50S ribosomal protein L9	rplI	15.769	99.454	1566000000	23.823	25.3143	23.8885	25.8627	26.5434	24.8964	0
+	1.33499	-1.42647	P0ADZ4	P0ADZ4	30S ribosomal protein S15	rpsO	10.269	20.467	724340000	24.4055	23.0873	23.4473	25.6797	24.6718	24.868	-1
	1.07166	-1.42962	P0A7A9	P0A7A9	Inorganic pyrophosphatase	ppa	19.703	39.313	1095000000	25.1475	23.7962	23.4205	25.0885	26.2229	25.3417	0
	0.954793	-1.43331	P69776	P69776	Major outer membrane lipoprotein Lpp	lpp	8.3234	172.67	1370300000	24.7849	24.645	24.6934	27.5147	25.2069	25.7017	0
+	2.33988	-1.43888	P0ABJ9	P0ABJ9	Cytochrome bd-I ubiquinol oxidase subunit 1	cydA	58.204	105.07	688610000	23.031	23.7024	23.7464	24.7823	24.9018	25.1124	-1
+	2.08819	-1.45312	P0ACF4	P0ACF4	DNA-binding protein HU-beta	hupB	9.2255	40.153	1018000000	24.4549	23.6027	23.8846	25.1409	25.6951	25.4656	-1
+	2.07155	-1.45735	P60723	P60723	50S ribosomal protein L4	rplD	22.086	135.5	2088600000	25.2163	25.2076	24.9943	26.8458	26.9318	26.0127	-1
+	1.26967	-1.48645	P0A7K2	P0A7K2	50S ribosomal protein L7/L12	rplL	12.295	42.046	1237300000	23.7099	24.0772	24.0195	26.4289	25.2435	24.5935	0
	0.542955	-1.49707	P0A7L8	P0A7L8	50S ribosomal protein L27	rpmA	9.1244	76.697	981050000	24.2653	21.7682	24.9372	25.6383	23.6921	26.1316	0
+	2.89675	-1.53845	P0A955	P0A955	KHG/KDPG aldolase;4-hydroxy-2-oxoglutarate aldolase;2-dehydro-3-deoxy-phosphogluconate aldolase	eda	22.284	85.481	875300000	23.0756	23.627	23.4011	24.7035	25.0353	24.9802	-1
+	4.78007	-1.54857	P0A7X3	P0A7X3	30S ribosomal protein S9	rpsI	14.856	43.935	2382300000	24.9299	24.9608	25.0253	26.4205	26.6169	26.5243	-1
	1.09983	-1.55612	P0ABT2	P0ABT2	DNA protection during starvation protein	dps	18.695	81.484	409650000	23.1256	21.6456	22.0709	24.7956	23.1169	23.598	0
+	1.79277	-1.5718	P22259	P22259	Phosphoenolpyruvate carboxykinase [ATP]	pckA	59.643	86.031	524810000	23.04	22.7674	22.3122	24.723	24.4796	23.6323	-1
+	1.25927	-1.57661	P0A993	P0A993	Fructose-1,6-bisphosphatase class 1	fbp	36.833	196.46	763670000	22.0881	23.4658	22.7017	24.2857	NaN	24.3711	0
+	2.43803	-1.57745	P33940	P33940	Malate:quinone oxidoreductase	mqo	60.229	10.537	30191000	19.1326	19.045	18.7901	NaN	20.3846	20.7488	-1
	1.09158	-1.5775	P0A6Q6	P0A6Q6	3-hydroxyacyl-[acyl-carrier-protein] dehydratase FabZ	fabZ	17.033	24.05	171620000	20.962	21.9697	21.1751	23.567	NaN	22.3259	0
+	2.24374	-1.77063	P0AG55	P0AG55	50S ribosomal protein L6	rplF	18.904	254.24	3715800000	25.2428	25.0184	24.7651	27.3471	26.651	26.3401	-1
+	2.81311	-1.7918	P0A7T7	P0A7T7	30S ribosomal protein S18	rpsR	8.9863	23.764	523270000	23.6215	23.4873	23.5999	25.8126	25.2061	25.0654	-1
	0.644761	-1.80253	P0AE08	P0AE08	Alkyl hydroperoxide reductase subunit C	ahpC	20.761	54.5	426590000	21.5106	24.0029	21.1686	23.6447	NaN	24.4151	0
+	1.72433	-1.85718	P02413	P02413	50S ribosomal protein L15	rplO	14.98	115.19	2352500000	24.3722	25.6462	24.2101	26.3422	26.9355	26.5223	-1
+	2.48018	-1.88782	P0A7V8	P0A7V8	30S ribosomal protein S4	rpsD	23.469	279.44	2978600000	24.2381	24.6638	24.681	26.2422	26.9344	26.0699	-1
+	1.74327	-1.89566	P0A905	P0A905	Outer membrane lipoprotein SlyB	slyB	15.601	73.778	213500000	22.0067	21.6855	20.9967	24.2304	23.1646	22.9809	-1
+	1.39344	-1.90809	P0A7J0	P0A7J0	3,4-dihydroxy-2-butanone 4-phosphate synthase	ribB	23.353	174	1693200000	23.6761	24.1794	23.7521	25.3802	26.9914	24.9602	-1
+	1.85092	-1.93288	P0AG48	P0AG48	50S ribosomal protein L21	rplU	11.564	13.761	735310000	23.4284	24.3664	24.1297	26.0276	NaN	25.7878	-1
+	1.9707	-1.94092	P0ACF0	P0ACF0	DNA-binding protein HU-alpha	hupA	9.5349	197.62	1651200000	24.0272	24.7912	24.3474	26.0818	NaN	26.5773	-1
+	1.10728	-2.08532	P0A7V3	P0A7V3	30S ribosomal protein S3	rpsC	25.983	180.76	4525200000	24.1796	26.2406	25.0966	26.7007	28.5627	26.5094	0
+	2.40064	-2.09148	P60422	P60422	50S ribosomal protein L2	rplB	29.86	323.31	7635900000	25.3665	26.1242	26.0041	27.8105	27.539	28.4197	-1
+	1.65397	-2.21395	P0A7L3	P0A7L3	50S ribosomal protein L20	rplT	13.497	58.284	6254900000	25.7931	27.1248	25.7175	27.6771	29.064	28.5362	-1
	0.898596	-2.29064	P0ABK2	P0ABK2	Cytochrome bd-I ubiquinol oxidase subunit 2	cydB	42.453	33.411	208830000	21.2846	21.7627	21.595	22.3964	NaN	25.2797	0
+	2.87836	-2.37284	P0C018	P0C018	50S ribosomal protein L18	rplR	12.769	38.298	2496600000	25.8093	24.9828	25.3439	27.4629	28.0681	27.7234	-1
+	2.14972	-2.4054	P0A7S9	P0A7S9	30S ribosomal protein S13	rpsM	13.099	157.39	3102800000	24.71	26.1071	24.8442	27.6821	27.8739	27.3215	-1
+	2.31861	-2.42895	P60438	P60438	50S ribosomal protein L3	rplC	22.243	113.89	1872700000	24.369	24.6038	24.2362	26.4837	27.6594	26.3528	-1
+	2.17679	-2.43358	P00509	P00509	Aspartate aminotransferase	aspC	43.573	288.1	2254500000	24.4671	23.9327	22.9064	26.3475	25.9882	26.2712	-1
+	2.8584	-2.50821	P0A7K6	P0A7K6	50S ribosomal protein L19	rplS	13.133	179.22	1326000000	23.6562	23.7565	23.6899	25.8546	26.8393	25.9334	-1
+	2.05131	-2.5378	P0AF93	P0AF93	2-iminobutanoate/2-iminopropanoate deaminase	ridA	13.611	188.44	1992700000	24.5933	25.5753	23.8477	27.5437	27.1743	26.9117	-1
+	4.42032	-2.66634	P23847	P23847	Periplasmic dipeptide transport protein	dppA	60.293	22.832	281640000	22.1112	21.834	21.8892	24.6161	24.4282	24.7892	-1
+	1.77715	-2.71002	P0AG44	P0AG44	50S ribosomal protein L17	rplQ	14.364	62.631	3735300000	24.4917	26.1119	24.2674	26.9973	28.2408	27.7629	-1
+	3.38875	-2.74345	P0ABD8	P0ABD8	Biotin carboxyl carrier protein of acetyl-CoA carboxylase	accB	16.687	323.31	285410000000	31.6732	31.9419	31.1276	34.267	34.4832	34.2229	-1
+	3.10477	-2.9123	P0AFG0	P0AFG0	Transcription termination/antitermination protein NusG	nusG	20.531	304.57	5246000000	25.5043	26.4378	26.2368	28.7736	29.2493	28.8929	-1
+	1.73976	-2.97822	P0A7M2	P0A7M2	50S ribosomal protein L28	rpmB	9.0064	21.654	497170000	23.4033	21.417	23.2653	25.2732	26.5363	25.2107	-1
+	3.38141	-3.02897	P0A8W5	P0A8W5	UPF0301 protein YqgE	yqgE	20.686	66.017	299150000	22.0888	21.8922	21.5777	25.1885	25.0426	24.4145	-1
+	3.28569	-3.03663	P0A8E7	P0A8E7	UPF0234 protein YajQ	yajQ	18.344	160.14	1320200000	23.3964	23.3423	24.0471	26.4305	26.4481	27.0171	-1
+	1.47617	-3.07487	P61175	P61175	50S ribosomal protein L22	rplV	12.226	134.1	2102500000	23.2554	25.0297	23.1622	26.0463	28.3878	26.2377	-1
+	1.98745	-3.31844	P0ABU5	P0ABU5	Enhancing lycopene biosynthesis protein 2	elbB	22.981	323.31	2104000000	24.3314	23.9372	22.2854	26.1035	27.1439	27.2619	-1
+	2.21842	-6.17439	P76046	P76046	Uncharacterized protein YcjX	ycjX	52.609	68.898	205840000	NaN	18.7103	17.4783	25.3489	23.3337	24.1234	-1

## Sheet: Result_pHis binders acceptors
Significant	-LOG(P-value)	Difference	Protein IDs	Majority protein IDs	Protein names	Gene names	Mol. weight [kDa]	Score	Intensity	LFQ intensity pPyp-BP_1	LFQ intensity pPyp-BP_2	LFQ intensity pPyp-BP_3	LFQ intensity pPyp-BP_pHis_1	LFQ intensity pPyp-BP_pHis_2	LFQ intensity pPyp-BP_pHis_3	Significant pHis competed	pPyp-BP/Me-BP Significant	known pHis site (pHis acceptor=1)
+	2.96614	5.45058	P00562	P00562	Bifunctional aspartokinase/homoserine dehydrogenase 2;Aspartokinase;Homoserine dehydrogenase	metL	88.887	186.59	1231200000	24.5216	23.6433	23.4241	18.4011	NaN	18.4237	1	1	0
+	2.52612	4.35518	P13009	P13009	Methionine synthase	metH	136	323.31	1519300000	23.5585	22.5152	23.0116	18.9547	17.5142	19.5508	1	1	0
+	2.00015	4.2135	P27248	P27248	Aminomethyltransferase	gcvT	40.146	209.44	7564900000	27.1155	26.857	26.6418	21.7458	21.7605	24.4674	1	1	0
+	2.07844	3.66154	P04983	P04983	Ribose import ATP-binding protein RbsA	rbsA	55.041	323.31	623860000	23.9635	23.0414	23.7351	20.5443	NaN	19.2927	1	1	0
+	3.62184	2.86576	P0ADG7	P0ADG7	Inosine-5-monophosphate dehydrogenase	guaB	52.022	323.31	3790600000	25.7996	25.3566	25.7245	22.5529	22.6005	23.13	1	1	1
+	3.54059	1.56792	P21599	P21599	Pyruvate kinase II	pykA	51.357	323.31	6364000000	25.7579	25.7299	25.7645	24.0909	24.0152	24.4424	1	1	1
+	3.25902	3.21692	P05707	P05707	Sorbitol-6-phosphate 2-dehydrogenase	srlD	27.858	323.31	7734100000	27.179	27.36	27.2651	23.8354	23.645	24.6729	1	1	0
+	2.37479	3.20354	P0ABP8	P0ABP8	Purine nucleoside phosphorylase DeoD-type	deoD	25.95	323.31	21253000000	27.16	28.1455	28.1498	23.7743	25.2351	24.8352	1	1	0
+	3.03987	3.14359	P0A8F0	P0A8F0	Uracil phosphoribosyltransferase	upp	22.533	323.31	105730000000	29.7899	30.3679	29.3759	26.2815	26.8799	26.9415	1	1	0
+	1.77247	3.13095	P0A9A6	P0A9A6	Cell division protein FtsZ	ftsZ	40.323	323.31	3117100000	25.4811	25.1555	26.2332	23.4505	21.067	22.9595	1	1	0
+	2.18389	3.09902	P0AEU7	P0AEU7	Chaperone protein Skp	skp	17.688	219.46	585460000	23.2024	23.9532	23.6893	20.0358	NaN	20.9962	1	1	0
+	1.82955	3.03861	P45395	P45395	Arabinose 5-phosphate isomerase KdsD	kdsD	35.196	323.31	2469000000	24.6855	24.564	24.7909	20.8457	NaN	22.4373	1	1	0
+	2.84599	2.88003	P0AEG4	P0AEG4	Thiol:disulfide interchange protein DsbA	dsbA	23.104	120.64	1164400000	24.4251	24.8485	24.4105	NaN	21.9089	21.4538	1	1	0
+	3.22734	1.95049	P0A6F5	P0A6F5	60 kDa chaperonin	groL	57.328	323.31	43189000000	28.3638	28.0357	28.3102	26.5621	26.3189	25.9772	1	1	1
+	1.9646	2.4765	P00961	P00961	Glycine--tRNA ligase beta subunit	glyS	76.812	323.31	2260900000	23.8537	23.713	24.7617	21.162	21.2208	22.5162	1	1	0
+	1.94655	2.46379	P0A9M0	P0A9M0	Lon protease	lon	87.437	134	935200000	24.3045	23.2093	23.4633	NaN	21.0499	21.3406	1	1	0
+	3.12306	3.62862	P0A796	P0A796	ATP-dependent 6-phosphofructokinase isozyme 1	pfkA	34.842	226.43	3283200000	25.5176	25.0268	25.3159	22.3767	21.4064	21.1912	1	1	1
+	1.90325	2.40228	P12758	P12758	Uridine phosphorylase	udp	27.159	323.31	4655600000	25.3544	26.3027	26.0305	23.8487	22.5435	24.0886	1	1	0
+	2.13996	2.23722	P0A850	P0A850	Trigger factor	tig	48.192	323.31	7788000000	25.9559	26.155	26.3475	24.4494	23.0678	24.2295	1	1	0
+	1.84642	2.23342	P04079	P04079	GMP synthase [glutamine-hydrolyzing]	guaA	58.679	261.14	1185700000	24.1991	23.7853	23.9356	22.2835	NaN	21.1963	1	1	0
+	2.62103	2.17647	P08200	P08200	Isocitrate dehydrogenase [NADP]	icd	45.756	323.31	4043400000	25.5209	24.9661	25.0489	23.144	22.4848	23.3777	1	1	0
+	2.85366	2.08775	P0A7G6	P0A7G6	Protein RecA	recA	37.973	179.57	1168500000	24.598	24.2355	24.2031	22.1531	NaN	22.3625	1	1	0
+	2.90436	2.0057	P0AFG8	P0AFG8	Pyruvate dehydrogenase E1 component	aceE	99.667	323.31	55060000000	27.8186	28.2611	28.3885	25.9367	26.0144	26.5	1	1	1
+	2.88793	1.16245	P08839	P08839	Phosphoenolpyruvate-protein phosphotransferase	ptsI	63.561	321.41	3269000000	24.6237	24.4445	24.5328	23.6253	23.1658	23.3225	1	1	1
+	1.67695	1.96964	P0AES6	P0AES6	DNA gyrase subunit B	gyrB	89.949	259.85	595450000	23.2626	23.4628	23.7314	20.5717	21.6256	22.3504	1	1	0
+	1.97885	1.95676	P0AEK2	P0AEK2	3-oxoacyl-[acyl-carrier-protein] reductase FabG	fabG	25.56	323.31	2514000000	25.4152	25.9182	24.9847	23.5548	24.0254	22.8676	1	1	0
+	2.56337	1.7486	P00452	P00452	Ribonucleoside-diphosphate reductase 1 subunit alpha	nrdA	85.774	323.31	3303100000	26.9953	26.3736	26.7206	24.9299	24.6202	25.2937	1	1	1
+	2.58662	1.88451	P0AGF6	P0AGF6	L-threonine dehydratase catabolic TdcB	tdcB	35.232	323.31	10353000000	26.3133	26.5086	26.3691	23.9719	24.6906	24.8749	1	1	0
+	2.88109	1.88222	P0ACR9	P0ACR9	Transcriptional repressor MprA	mprA	20.563	115.81	1365900000	24.7692	24.8918	24.4102	22.4527	22.896	23.0758	1	1	0
+	2.95402	1.84701	P0ABQ0	P0ABQ0	Coenzyme A biosynthesis bifunctional protein CoaBC;Phosphopantothenoylcysteine decarboxylase;Phosphopantothenate--cysteine ligase	coaBC	43.438	113.94	543820000	23.1056	22.9161	23.2932	21.1952	NaN	21.3207	1	1	0
+	3.18642	1.76745	P00959	P00959	Methionine--tRNA ligase	metG	76.254	121.25	914510000	23.2613	23.7496	23.3944	21.8933	21.5065	21.7031	1	1	0
+	1.5456	1.75227	P0A862	P0A862	Thiol peroxidase	tpx	17.835	270.93	2867500000	25.6447	25.5772	25.0744	24.1825	NaN	23.1772	1	1	0
+	2.33676	3.30497	P31120	P31120	Phosphoglucosamine mutase	glmM	47.543	323.31	9618800000	26.2033	26.6026	27.1055	23.2183	22.5029	24.2753	1	1	1
+	2.33377	1.74546	P0A7B5	P0A7B5	Glutamate 5-kinase	proB	39.056	236.22	1380100000	23.7831	23.5232	23.368	21.9105	21.2855	22.2419	1	1	0
+	2.25247	1.65779	P0A6S7	P0A6S7	Glycerol-3-phosphate dehydrogenase [NAD(P)+]	gpsA	36.361	71.51	185430000	21.7312	22.1028	22.0774	20.5432	20.0821	NaN	1	1	0
+	1.81096	1.61509	P00962	P00962	Glutamine--tRNA ligase	glnS	63.477	202.27	1197700000	24.0709	23.4862	24.1434	22.4002	21.647	22.8079	1	1	0
+	2.27337	1.47904	P0A836	P0A836	Succinyl-CoA ligase [ADP-forming] subunit beta	sucC	41.392	200.67	1042500000	23.8191	23.4779	23.2816	22.0586	22.0358	NaN	1	1	1
+	2.14221	1.5109	P63284;A0A7H2C767	P63284	Chaperone protein ClpB	clpB	95.584	323.31	4210500000	24.7384	24.1736	24.9775	23.2826	22.7586	23.3156	1	1	1
+	1.52362	1.50995	P08997	P08997	Malate synthase A	aceB	60.273	110.54	645110000	23.4576	22.874	22.5344	21.2174	NaN	21.6734	1	1	0
+	1.62871	1.49538	P0A9C9	P0A9C9	Fructose-1,6-bisphosphatase 1 class 2	glpX	35.852	51.642	300950000	23.0361	22.2654	22.3226	20.8564	NaN	21.2356	1	1	0
+	3.36187	1.49062	P0A9M8	P0A9M8	Phosphate acetyltransferase	pta	77.171	323.31	12585000000	26.225	26.1949	26.3757	24.8727	24.5212	24.93	1	1	0
+	2.88222	1.48901	P00579	P00579	RNA polymerase sigma factor RpoD	rpoD	70.263	195.32	899970000	23.4995	23.3145	23.5942	21.857	21.7742	22.31	1	1	0
+	1.98748	2.40416	P04805	P04805	Glutamate--tRNA ligase	gltX	53.815	278.86	2639200000	26.8702	25.3577	25.6537	23.2432	23.3729	24.053	1	1	1
+	1.8832	1.46647	P00864	P00864	Phosphoenolpyruvate carboxylase	ppc	99.061	124.94	349930000	22.4986	21.698	22.4443	20.3115	20.8486	21.0814	1	1	0
+	1.4532	1.42092	P0A9P0	P0A9P0	Dihydrolipoyl dehydrogenase	lpdA	50.688	323.31	17395000000	26.5738	27.3131	27.2315	24.8436	26.0693	25.9427	1	1	0
+	2.08391	1.41215	P09373	P09373	Formate acetyltransferase 1	pflB	85.356	323.31	71058000000	28.3113	28.6179	28.7454	26.6402	27.2945	27.5035	1	1	0
+	1.9355	1.39582	P0A8L1	P0A8L1	Serine--tRNA ligase	serS	48.413	323.31	2284000000	23.8604	24.7289	24.6463	23.0103	22.753	23.2849	1	1	0
+	1.82379	1.37409	P0ABH7	P0ABH7	Citrate synthase	gltA	48.014	323.31	38382000000	28.8616	28.9696	28.155	26.8589	27.4307	27.5743	1	1	1
+	1.5233	1.29459	P37617	P37617	Lead, cadmium, zinc and mercury-transporting ATPase	zntA	76.839	55.317	338380000	21.9578	21.581	22.1814	20.2858	NaN	20.9385	1	1	0
+	1.91405	1.25361	P0AB77	P0AB77	2-amino-3-ketobutyrate coenzyme A ligase	kbl	43.117	80.676	608340000	23.6317	23.205	23.6837	22.0299	21.9864	22.7432	1	1	0
+	1.60255	1.18967	P31663	P31663	Pantothenate synthetase	panC	31.597	20.377	159880000	20.8461	21.5485	21.4471	NaN	20.0485	20.1333	1	1	0
+	1.6858	1.97766	P0AG30	P0AG30	Transcription termination factor Rho	rho	47.004	323.31	2815200000	24.7938	25.6318	24.5743	23.2166	NaN	22.828	1	1	1
+	2.34287	1.15731	P60785	P60785	Elongation factor 4	lepA	66.57	102.42	675910000	23.5267	23.3731	23.3689	22.3809	21.8861	22.5297	1	1	0
+	2.51347	1.11789	P76658	P76658	Bifunctional protein HldE;D-beta-D-heptose 7-phosphate kinase;D-beta-D-heptose 1-phosphate adenylyltransferase	hldE	51.05	156.68	426160000	22.3331	22.5986	22.8748	21.5733	21.3289	21.5507	1	1	0
+	1.3004	1.01391	P27306	P27306	Soluble pyridine nucleotide transhydrogenase	sthA	51.56	41.263	250230000	22.4309	21.3377	21.4273	20.9186	20.5739	20.6616	1	1	0

## Sheet: Experimental summary
Raw file	Experiment	Enzyme	Enzyme mode	Enzyme first search	Enzyme mode first search	Use enzyme first search	Variable modifications	Fixed modifications	Multi modifications	Variable modifications first search	Use variable modifications first search	Requantify	Multiplicity	Max. missed cleavages	Labels0	LC-MS run type	Time-dependent recalibration	MS	MS/MS	MS3	MS/MS submitted	MS/MS submitted (SIL)	MS/MS submitted (ISO)	MS/MS submitted (PEAK)	MS/MS identified	MS/MS identified (SIL)	MS/MS identified (ISO)	MS/MS identified (PEAK)	MS/MS identified [%]	MS/MS identified (SIL) [%]	MS/MS identified (ISO) [%]	MS/MS identified (PEAK) [%]	Peptide sequences identified	Peaks	Peaks sequenced	Peaks sequenced [%]	Peaks repeatedly sequenced	Peaks repeatedly sequenced [%]	Isotope patterns	Isotope patterns sequenced	Isotope patterns sequenced (z>1)	Isotope patterns sequenced [%]	Isotope patterns sequenced (z>1) [%]	Isotope patterns repeatedly sequenced	Isotope patterns repeatedly sequenced [%]	Recalibrated	Av. absolute mass deviation [ppm]	Mass standard deviation [ppm]	Av. absolute mass deviation [mDa]
12_pPyp-BP_pHis_2	pPyp-BP_pHis_2	Trypsin/P	Specific			FALSE	Oxidation (M);Acetyl (Protein N-term)	Carbamidomethyl (C)			FALSE	FALSE	1	2		Standard		21315	21996	0	27139	16853	0	10286	2922	2812	0	110	11	17	0	1.1	1321	1505573	14599	0.97	2677	18	92321	10186	9050	11	15	2647	26	+	0.54995	0.8237	0.32241
15_pPyp-BP_pHis_3	pPyp-BP_pHis_3	Trypsin/P	Specific			FALSE	Oxidation (M);Acetyl (Protein N-term)	Carbamidomethyl (C)			FALSE	FALSE	1	2		Standard		20531	23562	0	29084	18040	0	11044	4067	3836	0	231	14	21	0	2.1	1916	1402166	15783	1.1	2837	18	85596	10891	9842	13	17	2935	27	+	0.53389	0.79085	0.32073
18_pPyp-BP_1	pPyp-BP_1	Trypsin/P	Specific			FALSE	Oxidation (M);Acetyl (Protein N-term)	Carbamidomethyl (C)			FALSE	FALSE	1	2		Standard		14626	41268	0	48329	34207	0	14122	14711	13926	0	785	30	41	0	5.6	4738	1236344	24997	2	6077	24	102487	18136	16508	18	22	5809	32	+	0.60851	0.91939	0.38279
21_pPyp-BP_2	pPyp-BP_2	Trypsin/P	Specific			FALSE	Oxidation (M);Acetyl (Protein N-term)	Carbamidomethyl (C)			FALSE	FALSE	1	2		Standard		18582	30445	0	35830	25060	0	10770	8842	8426	0	416	25	34	0	3.9	3625	1460453	19671	1.3	3927	20	103662	14682	13239	14	18	3878	26	+	0.58585	0.87716	0.35728
24_pPyp-BP_3	pPyp-BP_3	Trypsin/P	Specific			FALSE	Oxidation (M);Acetyl (Protein N-term)	Carbamidomethyl (C)			FALSE	FALSE	1	2		Standard		16558	36103	0	42431	29775	0	12656	12788	12168	0	620	30	41	0	4.9	4535	1323564	22014	1.7	4976	23	98818	16090	14615	16	20	4740	29	+	0.60976	0.91007	0.38177
9_pPyp-BP_pHis_1	pPyp-BP_pHis_1	Trypsin/P	Specific			FALSE	Oxidation (M);Acetyl (Protein N-term)	Carbamidomethyl (C)			FALSE	FALSE	1	2		Standard		18229	31992	0	38863	25121	0	13742	4482	4347	0	135	12	17	0	0.98	2464	1338911	23780	1.8	3787	16	101189	16962	15443	17	22	4379	26	+	0.50785	0.75326	0.31063
Total																		109841	185366	0	221676	149056	0	72620	47812	45515	0	2297	22	31	0	3.2	6415	8267011					584073	86947	78697	15	19	24388	28		0.57951	0.86947	0.35764
[truncated: 2 more columns]
