# Supplementary material for: Chemoproteomic identification of phosphohistidine acceptors: posttranslational activity regulation of a key glycolytic enzyme
Source: Royal Society of Chemistry journal article supplement (doi:10.1039/d5sc01024a), 2025-01-01
Supplement: d5sc01024a4.xlsx [file d5sc01024a4.xlsx]

## Sheet: pPyp-BPSites_PfkA
Proteins	Positions within proteins	Leading proteins	Protein	Fasta headers	Localization prob	Score diff	PEP	Score	Delta score	Score for localization	Localization prob 02_PfkA.raw	Score diff 02_PfkA.raw	PEP 02_PfkA.raw	Score 02_PfkA.raw	Diagnostic peak	Number of pPyp-BP	Amino acid	Sequence window	Modification window	Peptide window coverage	pPyp-BP Probabilities	pPyp-BP Score diffs	Position in peptide	Charge	Mass error [ppm]	Intensity	Intensity___1	Intensity___2	Intensity___3	Ratio mod/base	Intensity 02_PfkA.raw	Ratio mod/base 02_PfkA.raw	Intensity 02_PfkA.raw___1	Intensity 02_PfkA.raw___2	Intensity 02_PfkA.raw___3	Occupancy 02_PfkA.raw	Occupancy ratio02_PfkA.raw	Occupancy error scale 02_PfkA.raw	Reverse	Potential contaminant	id	Protein group IDs	Positions	Position	Peptide IDs	Mod. peptide IDs	Evidence IDs	MS/MS IDs	Best localization evidence ID
sp|P0A796|PFKA_ECOLI	61	sp|P0A796|PFKA_ECOLI	sp|P0A796|PFKA_ECOLI	sp|P0A796|PFKA_ECOLI ATP-dependent 6-phosphofructokinase isozyme 1 OS=Escherichia coli (strain K12) OX=83333 GN=pfkA PE=1 SV=1	0.906907	10.1859	1.36e-05	104.45	103.62	104.45	0.906907	10.1859	1.36e-05	104.45		1	M	YEDRMVQLDRYSVSDMINRGGTFLGSARFPE	X;X;X;X;Oxidation (M);X;X;X;X;X;X;X;X;X;X;Oxidation (M);pPyp-BP;X;X;X;X;X;X;X;X;pPyp-BP;pPyp-BP;X;X;pPyp-BP;X;X	XXXXXXXXXXPPPPPPPPPXXXXXXXXXXXX	YSVSD(0.006)M(0.907)I(0.087)N(0.001)R	Y(-86)S(-86)V(-60)S(-41)D(-22)M(10)I(-10)N(-32)R(-42)	6	2	-0.019867	20771000	20771000	0	0	0.0084809	20771000	0.0084809	20771000	0	0						6	1	61	61	34	52	202	572	202
sp|P0A796|PFKA_ECOLI	74	sp|P0A796|PFKA_ECOLI	sp|P0A796|PFKA_ECOLI	sp|P0A796|PFKA_ECOLI ATP-dependent 6-phosphofructokinase isozyme 1 OS=Escherichia coli (strain K12) OX=83333 GN=pfkA PE=1 SV=1	0.58111	2.85997	9.58e-06	101.45	96.738	101.45	0.58111	2.85997	9.58e-06	101.45		1	F	SDMINRGGTFLGSARFPEFRDENIRAVAIEN	X;X;Oxidation (M);pPyp-BP;X;X;X;X;X;X;X;X;X;X;X;X;pPyp-BP;X;X;X;X;X;X;X;X;X;X;X;X;X;X;X	XXXXXXPPPPPPPPPPPPPPXXXXXXXXXXX	GGTFLGS(0.001)A(0.009)R(0.028)F(0.581)P(0.301)E(0.067)F(0.011)R(0.002)	G(-85)G(-85)T(-85)F(-67)L(-50)G(-36)S(-26)A(-18)R(-13)F(2.9)P(-2.9)E(-9.4)F(-17)R(-24)	10	3	-0.18701	72009000	72009000	0	0	0.19815	72009000	0.19815	72009000	0	0						2	1	74	74	13	16	78	182	78
sp|P0A796|PFKA_ECOLI	70	sp|P0A796|PFKA_ECOLI	sp|P0A796|PFKA_ECOLI	sp|P0A796|PFKA_ECOLI ATP-dependent 6-phosphofructokinase isozyme 1 OS=Escherichia coli (strain K12) OX=83333 GN=pfkA PE=1 SV=1	0.342994	1.47851	1.7e-07	106.17	103.68	106.17	0.342994	1.47851	1.7e-07	106.17			G	RYSVSDMINRGGTFLGSARFPEFRDENIRAV	X;X;X;X;X;X;Oxidation (M);pPyp-BP;X;X;X;X;X;X;X;X;pPyp-BP;X;X;X;X;X;X;X;X;X;X;X;X;X;X;X	XXXXXXXXXXPPPPPPPPPPPPPPXXXXXXX	GGTFL(0.001)G(0.343)S(0.201)A(0.201)R(0.244)F(0.01)PEFR	G(-89)G(-89)T(-89)F(-62)L(-28)G(1.5)S(-2.3)A(-2.3)R(-1.5)F(-15)P(-32)E(-30)F(-37)R(-36)	6	3	-0.15133	0	0	0	0	0	0	0	0	0	0						3	1	70	70	13	16			76
sp|P0A796|PFKA_ECOLI	72	sp|P0A796|PFKA_ECOLI	sp|P0A796|PFKA_ECOLI	sp|P0A796|PFKA_ECOLI ATP-dependent 6-phosphofructokinase isozyme 1 OS=Escherichia coli (strain K12) OX=83333 GN=pfkA PE=1 SV=1	0.321451	0	2e-11	136.84	121.57	136.84	0.321451	0	2e-11	136.84			A	SVSDMINRGGTFLGSARFPEFRDENIRAVAI	X;X;X;X;Oxidation (M);pPyp-BP;X;X;X;X;X;X;X;X;X;X;X;X;X;X;X;X;X;X;X;X;X;X;X;X;X;X	XXXXXXXXXXXXXXXXXXXXXXXXXXXXXXX	GGTFL(0.001)G(0.025)S(0.321)A(0.321)R(0.321)F(0.01)PEFR	G(-54)G(-54)T(-57)F(-47)L(-27)G(-11)S(0)A(0)R(0)F(-15)P(-53)E(-53)F(-89)R(-100)	8	2	-0.061214	0	0	0	0	0	0	0	0	0	0						0	1	72	72	13	16			77
sp|P0A796|PFKA_ECOLI	73	sp|P0A796|PFKA_ECOLI	sp|P0A796|PFKA_ECOLI	sp|P0A796|PFKA_ECOLI ATP-dependent 6-phosphofructokinase isozyme 1 OS=Escherichia coli (strain K12) OX=83333 GN=pfkA PE=1 SV=1	0.321451	0	2e-11	136.84	121.57	136.84	0.321451	0	2e-11	136.84			R	VSDMINRGGTFLGSARFPEFRDENIRAVAIE	X;X;X;Oxidation (M);pPyp-BP;X;X;X;X;X;X;X;X;X;X;X;X;X;X;X;X;X;X;X;X;X;X;X;X;X;X;X	XXXXXXXXXXXXXXXXXXXXXXXXXXXXXXX	GGTFL(0.001)G(0.025)S(0.321)A(0.321)R(0.321)F(0.01)PEFR	G(-54)G(-54)T(-57)F(-47)L(-27)G(-11)S(0)A(0)R(0)F(-15)P(-53)E(-53)F(-89)R(-100)	9	2	-0.061214	0	0	0	0	0	0	0	0	0	0						8	1	73	73	13	16			77
sp|P0A796|PFKA_ECOLI	71	sp|P0A796|PFKA_ECOLI	sp|P0A796|PFKA_ECOLI	sp|P0A796|PFKA_ECOLI ATP-dependent 6-phosphofructokinase isozyme 1 OS=Escherichia coli (strain K12) OX=83333 GN=pfkA PE=1 SV=1	0.321451	0	2e-11	136.84	121.57	136.84	0.321451	0	2e-11	136.84			S	YSVSDMINRGGTFLGSARFPEFRDENIRAVA	X;X;X;X;X;Oxidation (M);pPyp-BP;X;X;X;X;X;X;X;X;X;pPyp-BP;X;X;X;X;X;X;X;X;X;X;X;X;X;X;X	XXXXXXXXXPPPPPPPPPPPPPPXXXXXXXX	GGTFL(0.001)G(0.025)S(0.321)A(0.321)R(0.321)F(0.01)PEFR	G(-54)G(-54)T(-57)F(-47)L(-27)G(-11)S(0)A(0)R(0)F(-15)P(-53)E(-53)F(-89)R(-100)	7	2	-0.061214	0	0	0	0	0	0	0	0	0	0						9	1	71	71	13	16			77
[truncated: 11 more columns]

## Sheet: Experimental Sumamry
Raw file	Experiment	Enzyme	Enzyme mode	Enzyme first search	Enzyme mode first search	Use enzyme first search	Variable modifications	Fixed modifications	Multi modifications	Variable modifications first search	Use variable modifications first search	Requantify	Multiplicity	Max. missed cleavages	Labels0	LC-MS run type	Time-dependent recalibration	MS	MS/MS	MS3	MS/MS submitted	MS/MS submitted (SIL)	MS/MS submitted (ISO)	MS/MS submitted (PEAK)	MS/MS identified	MS/MS identified (SIL)	MS/MS identified (ISO)	MS/MS identified (PEAK)	MS/MS identified [%]	MS/MS identified (SIL) [%]	MS/MS identified (ISO) [%]	MS/MS identified (PEAK) [%]	Peptide sequences identified	Peaks	Peaks sequenced	Peaks sequenced [%]	Peaks repeatedly sequenced	Peaks repeatedly sequenced [%]	Isotope patterns	Isotope patterns sequenced	Isotope patterns sequenced (z>1)	Isotope patterns sequenced [%]	Isotope patterns sequenced (z>1) [%]	Isotope patterns repeatedly sequenced	Isotope patterns repeatedly sequenced [%]	Recalibrated	Av. absolute mass deviation [ppm]	Mass standard deviation [ppm]	Av. absolute mass deviation [mDa]
02_PfkA	02_PfkA.raw	Trypsin/P	Specific			FALSE	Oxidation (M);Acetyl (Protein N-term);pPyp-BP	Carbamidomethyl (C)			FALSE	FALSE	1	2		Standard		9626	7474	0	8868	6080	0	2788	608	546	0	62	6.9	9	0	2.2	35	552326	5035	0.91	958	19	30228	3755	3590	12	15	993	26	+	0.38046	0.57407	0.26228
Total																		9626	7474	0	8868	6080	0	2788	608	546	0	62	6.9	9	0	2.2	35	552326					30228	3755	3590	12	15	993	26		0.38046	0.57407	0.26228
[truncated: 1 more columns]

## Sheet: peptides
Sequence	N-term cleavage window	C-term cleavage window	Amino acid before	First amino acid	Second amino acid	Second last amino acid	Last amino acid	Amino acid after	A Count	R Count	N Count	D Count	C Count	Q Count	E Count	G Count	H Count	I Count	L Count	K Count	M Count	F Count	P Count	S Count	T Count	W Count	Y Count	V Count	U Count	O Count	Length	Missed cleavages	Mass	Proteins	Leading razor protein	Start position	End position	Unique (Groups)	Unique (Proteins)	Charges	PEP	Score	Experiment 02_PfkA.raw	Intensity	Intensity 02_PfkA.raw	Reverse	Potential contaminant	id	Protein group IDs
ATVLGHIQR	ELAHFIEKETGRETRATVLGHIQRGGSPVP	TGRETRATVLGHIQRGGSPVPYDRILASRM	R	A	T	Q	R	G	1	1	0	0	0	1	0	1	1	1	1	0	0	0	0	0	1	0	0	1	0	0	9	0	993.572	sp|P0A796|PFKA_ECOLI	sp|P0A796|PFKA_ECOLI	245	253	yes	yes	2	7.2127e-24	208.59	7	7.2591e+09	7.2591e+09			0	1
ATVLGHIQRGGSPVPYDR	ELAHFIEKETGRETRATVLGHIQRGGSPVP	LGHIQRGGSPVPYDRILASRMGAYAIDLLL	R	A	T	D	R	I	1	2	0	1	0	1	0	3	1	1	1	0	0	0	2	1	1	0	1	2	0	0	18	1	1922.01	sp|P0A796|PFKA_ECOLI	sp|P0A796|PFKA_ECOLI	245	262	yes	yes	3;4	0.0003049	63.337	4	5572000	5572000			1	1
AVAIENLKK	LGSARFPEFRDENIRAVAIENLKKRGIDAL	RDENIRAVAIENLKKRGIDALVVIGGDGSY	R	A	V	K	K	R	2	0	1	0	0	0	1	0	0	1	1	2	0	0	0	0	0	0	0	1	0	0	9	1	984.597	sp|P0A796|PFKA_ECOLI	sp|P0A796|PFKA_ECOLI	84	92	yes	yes	2	0.00068819	75.109	3	0	0			2	1
CVGIQNEQLVHHDIIDAIENMK	GAYAIDLLLAGYGGRCVGIQNEQLVHHDII	QLVHHDIIDAIENMKRPFKGDWLDCAKKLY	R	C	V	M	K	R	1	0	2	2	1	2	2	1	2	4	1	1	1	0	0	0	0	0	0	2	0	0	22	0	2575.25	sp|P0A796|PFKA_ECOLI	sp|P0A796|PFKA_ECOLI	284	305	yes	yes	2;3;4	4.474e-286	538.27	4	7.5925e+09	7.5925e+09			3	1
CVGIQNEQLVHHDIIDAIENMKR	GAYAIDLLLAGYGGRCVGIQNEQLVHHDII	LVHHDIIDAIENMKRPFKGDWLDCAKKLYH	R	C	V	K	R	P	1	1	2	2	1	2	2	1	2	4	1	1	1	0	0	0	0	0	0	2	0	0	23	1	2731.35	sp|P0A796|PFKA_ECOLI	sp|P0A796|PFKA_ECOLI	284	306	yes	yes	3;4;5	1.1737e-25	171.06	5	142920000	142920000			4	1
CVGIQNEQLVHHDIIDAIENMKRPFK	GAYAIDLLLAGYGGRCVGIQNEQLVHHDII	HDIIDAIENMKRPFKGDWLDCAKKLYHHHH	R	C	V	F	K	G	1	1	2	2	1	2	2	1	2	4	1	2	1	1	1	0	0	0	0	2	0	0	26	2	3103.57	sp|P0A796|PFKA_ECOLI	sp|P0A796|PFKA_ECOLI	284	309	yes	yes	5;6	7.1873e-35	201.63	2	55768000	55768000			5	1
EDLVNEIK	GGCEFVVVPEVEFSREDLVNEIKAGIAKGK	PEVEFSREDLVNEIKAGIAKGKKHAIVAIT	R	E	D	I	K	A	0	0	1	1	0	0	2	0	0	1	1	1	0	0	0	0	0	0	0	1	0	0	8	0	958.497	sp|P0A796|PFKA_ECOLI	sp|P0A796|PFKA_ECOLI	200	207	yes	yes	2	9.7264e-12	132.08	29	11437000000	11437000000			6	1
EDLVNEIKAGIAK	GGCEFVVVPEVEFSREDLVNEIKAGIAKGK	SREDLVNEIKAGIAKGKKHAIVAITEHMCD	R	E	D	A	K	G	2	0	1	1	0	0	2	1	0	2	1	2	0	0	0	0	0	0	0	1	0	0	13	1	1398.77	sp|P0A796|PFKA_ECOLI	sp|P0A796|PFKA_ECOLI	200	212	yes	yes	2;3	6.5954e-33	220.5	5	39753000	39753000			7	1
FPEFRDENIR	SDMINRGGTFLGSARFPEFRDENIRAVAIE	LGSARFPEFRDENIRAVAIENLKKRGIDAL	R	F	P	I	R	A	0	2	1	1	0	0	2	0	0	1	0	0	0	2	1	0	0	0	0	0	0	0	10	1	1321.64	sp|P0A796|PFKA_ECOLI	sp|P0A796|PFKA_ECOLI	74	83	yes	yes	2;3	2.0874e-23	214.83	3	428560000	428560000			8	1
GDWLDCAK	HDIIDAIENMKRPFKGDWLDCAKKLYHHHH	NMKRPFKGDWLDCAKKLYHHHHHH______	K	G	D	A	K	K	1	0	0	2	1	0	0	1	0	0	1	1	0	0	0	0	0	1	0	0	0	0	8	0	963.412	sp|P0A796|PFKA_ECOLI	sp|P0A796|PFKA_ECOLI	310	317	yes	yes	2	5.9266e-07	107.32	5	2.0711e+09	2.0711e+09			9	1
GDWLDCAKK	HDIIDAIENMKRPFKGDWLDCAKKLYHHHH	MKRPFKGDWLDCAKKLYHHHHHH_______	K	G	D	K	K	L	1	0	0	2	1	0	0	1	0	0	1	2	0	0	0	0	0	1	0	0	0	0	9	1	1091.51	sp|P0A796|PFKA_ECOLI	sp|P0A796|PFKA_ECOLI	310	318	yes	yes	2	3.8744e-07	116.25	2	38490000	38490000			10	1
GGSPVPYDR	TGRETRATVLGHIQRGGSPVPYDRILASRM	LGHIQRGGSPVPYDRILASRMGAYAIDLLL	R	G	G	D	R	I	0	1	0	1	0	0	0	2	0	0	0	0	0	0	2	1	0	0	1	1	0	0	9	0	946.451	sp|P0A796|PFKA_ECOLI	sp|P0A796|PFKA_ECOLI	254	262	yes	yes	2	1.9149e-07	124.98	3	7.9944e+09	7.9944e+09			11	1
GGTFLGSAR	MVQLDRYSVSDMINRGGTFLGSARFPEFRD	SDMINRGGTFLGSARFPEFRDENIRAVAIE	R	G	G	A	R	F	1	1	0	0	0	0	0	3	0	0	1	0	0	1	0	1	1	0	0	0	0	0	9	0	864.445	sp|P0A796|PFKA_ECOLI	sp|P0A796|PFKA_ECOLI	65	73	yes	yes	2	0.012526	47.599	1	16320000	16320000			12	1
GGTFLGSARFPEFR	MVQLDRYSVSDMINRGGTFLGSARFPEFRD	RGGTFLGSARFPEFRDENIRAVAIENLKKR	R	G	G	F	R	D	1	2	0	0	0	0	1	3	0	0	1	0	0	3	1	1	1	0	0	0	0	0	14	1	1540.78	sp|P0A796|PFKA_ECOLI	sp|P0A796|PFKA_ECOLI	65	78	yes	yes	2;3	6.7966e-12	136.84	6	363410000	363410000			13	1
GGTFLGSARFPEFRDENIR	MVQLDRYSVSDMINRGGTFLGSARFPEFRD	LGSARFPEFRDENIRAVAIENLKKRGIDAL	R	G	G	I	R	A	1	3	1	1	0	0	2	3	0	1	1	0	0	3	1	1	1	0	0	0	0	0	19	2	2168.08	sp|P0A796|PFKA_ECOLI	sp|P0A796|PFKA_ECOLI	65	83	yes	yes	4	0.00016976	67.727	2	5220800	5220800			14	1
GIDALVVIGGDGSYMGAMR	DENIRAVAIENLKKRGIDALVVIGGDGSYM	LVVIGGDGSYMGAMRLTEMGFPCIGLPGTI	R	G	I	M	R	L	2	1	0	2	0	0	0	5	0	2	1	0	2	0	0	1	0	0	1	2	0	0	19	0	1880.91	sp|P0A796|PFKA_ECOLI	sp|P0A796|PFKA_ECOLI	94	112	yes	yes	2;3	2.9044e-47	241.84	17	7.5415e+09	7.5415e+09			15	1
GKKHAIVAITEHMCDVDELAHFIEK	SREDLVNEIKAGIAKGKKHAIVAITEHMCD	EHMCDVDELAHFIEKETGRETRATVLGHIQ	K	G	K	E	K	E	3	0	0	2	1	0	3	1	3	3	1	3	1	1	0	0	1	0	0	2	0	0	25	2	2890.45	sp|P0A796|PFKA_ECOLI	sp|P0A796|PFKA_ECOLI	213	237	yes	yes	5	0.00014578	70.569	1	3834200	3834200			16	1
GTDYTIGFFTALSTVVEAIDR	FPCIGLPGTIDNDIKGTDYTIGFFTALSTV	GFFTALSTVVEAIDRLRDTSSSHQRISVVE	K	G	T	D	R	L	2	1	0	2	0	0	1	2	0	2	1	0	0	2	0	1	4	0	1	2	0	0	21	0	2275.14	sp|P0A796|PFKA_ECOLI	sp|P0A796|PFKA_ECOLI	133	153	yes	yes	2;3	7.2206e-26	225.55	2	182720000	182720000			17	1
HAIVAITEHMCDVDELAHFIEK	DLVNEIKAGIAKGKKHAIVAITEHMCDVDE	EHMCDVDELAHFIEKETGRETRATVLGHIQ	K	H	A	E	K	E	3	0	0	2	1	0	3	0	3	3	1	1	1	1	0	0	1	0	0	2	0	0	22	0	2577.24	sp|P0A796|PFKA_ECOLI	sp|P0A796|PFKA_ECOLI	216	237	yes	yes	3;4;5	1.5429e-64	267.32	6	43386000000	43386000000			18	1
IGVLTSGGDAPGMNAAIR	______________________________	LTSGGDAPGMNAAIRGVVRSALTEGLEVMG	K	I	G	I	R	G	3	1	1	1	0	0	0	4	0	2	1	0	1	0	1	1	1	0	0	1	0	0	18	0	1698.87	sp|P0A796|PFKA_ECOLI	sp|P0A796|PFKA_ECOLI	5	22	yes	yes	2;3	7.4891e-37	223.08	13	10269000000	10269000000			19	1
IGVLTSGGDAPGMNAAIRGVVR	______________________________	GDAPGMNAAIRGVVRSALTEGLEVMGIYDG	K	I	G	V	R	S	3	2	1	1	0	0	0	5	0	2	1	0	1	0	1	1	1	0	0	3	0	0	22	1	2110.13	sp|P0A796|PFKA_ECOLI	sp|P0A796|PFKA_ECOLI	5	26	yes	yes	3	0.01814	35.748	1	7216900	7216900			20	1
ISVVEVMGR	EAIDRLRDTSSSHQRISVVEVMGRYCGDLT	SSSHQRISVVEVMGRYCGDLTLAAAIAGGC	R	I	S	G	R	Y	0	1	0	0	0	0	1	1	0	1	0	0	1	0	0	1	0	0	0	3	0	0	9	0	988.538	sp|P0A796|PFKA_ECOLI	sp|P0A796|PFKA_ECOLI	164	172	yes	yes	2	1.325e-10	141.39	15	6.6459e+09	6.6459e+09			21	1
KHAIVAITEHMCDVDELAHFIEK	EDLVNEIKAGIAKGKKHAIVAITEHMCDVD	EHMCDVDELAHFIEKETGRETRATVLGHIQ	K	K	H	E	K	E	3	0	0	2	1	0	3	0	3	3	1	2	1	1	0	0	1	0	0	2	0	0	23	1	2705.33	sp|P0A796|PFKA_ECOLI	sp|P0A796|PFKA_ECOLI	215	237	yes	yes	3;4;5	2.0843e-52	243.35	4	436700000	436700000			22	1
KIGVLTSGGDAPGMNAAIR	______________________________	LTSGGDAPGMNAAIRGVVRSALTEGLEVMG	K	K	I	I	R	G	3	1	1	1	0	0	0	4	0	2	1	1	1	0	1	1	1	0	0	1	0	0	19	1	1826.97	sp|P0A796|PFKA_ECOLI	sp|P0A796|PFKA_ECOLI	4	22	yes	yes	2;3	3.2534e-11	88.283	8	252620000	252620000			23	1
LTEMGFPCIGLPGTIDNDIK	LVVIGGDGSYMGAMRLTEMGFPCIGLPGTI	FPCIGLPGTIDNDIKGTDYTIGFFTALSTV	R	L	T	I	K	G	0	0	1	2	1	0	1	3	0	3	2	1	1	1	2	0	2	0	0	0	0	0	20	0	2190.07	sp|P0A796|PFKA_ECOLI	sp|P0A796|PFKA_ECOLI	113	132	yes	yes	2;3;4	7.0205e-39	237.21	9	69060000000	69060000000			25	1
MGAYAIDLLLAGYGGR	RGGSPVPYDRILASRMGAYAIDLLLAGYGG	GAYAIDLLLAGYGGRCVGIQNEQLVHHDII	R	M	G	G	R	C	3	1	0	1	0	0	0	4	0	1	3	0	1	0	0	0	0	0	2	0	0	0	16	0	1639.84	sp|P0A796|PFKA_ECOLI	sp|P0A796|PFKA_ECOLI	268	283	yes	yes	2;3	8.4379e-74	270.61	13	24361000000	24361000000			26	1
MVQLDRYSVSDMINR	VMGIYDGYLGLYEDRMVQLDRYSVSDMINR	MVQLDRYSVSDMINRGGTFLGSARFPEFRD	R	M	V	N	R	G	0	2	1	2	0	1	0	0	0	1	1	0	2	0	0	2	0	0	1	2	0	0	15	1	1825.88	sp|P0A796|PFKA_ECOLI	sp|P0A796|PFKA_ECOLI	50	64	yes	yes	2;3	8.9066e-12	134.68	5	115690000	115690000			27	1
RGIDALVVIGGDGSYMGAMR	RDENIRAVAIENLKKRGIDALVVIGGDGSY	LVVIGGDGSYMGAMRLTEMGFPCIGLPGTI	K	R	G	M	R	L	2	2	0	2	0	0	0	5	0	2	1	0	2	0	0	1	0	0	1	2	0	0	20	1	2037.01	sp|P0A796|PFKA_ECOLI	sp|P0A796|PFKA_ECOLI	93	112	yes	yes	2;3	1.1409e-07	85.248	2	25545000	25545000			28	1
RPFKGDWLDCAK	QLVHHDIIDAIENMKRPFKGDWLDCAKKLY	NMKRPFKGDWLDCAKKLYHHHHHH______	K	R	P	A	K	K	1	1	0	2	1	0	0	1	0	0	1	2	0	1	1	0	0	1	0	0	0	0	12	2	1491.73	sp|P0A796|PFKA_ECOLI	sp|P0A796|PFKA_ECOLI	306	317	yes	yes	3	0.0040681	64.827	1	4016700	4016700			29	1
SALTEGLEVMGIYDGYLGLYEDR	GDAPGMNAAIRGVVRSALTEGLEVMGIYDG	VMGIYDGYLGLYEDRMVQLDRYSVSDMINR	R	S	A	D	R	M	1	1	0	2	0	0	3	4	0	1	4	0	1	0	0	1	1	0	3	1	0	0	23	0	2563.22	sp|P0A796|PFKA_ECOLI	sp|P0A796|PFKA_ECOLI	27	49	yes	yes	2;3	1.865e-78	295.03	3	340970000	340970000			30	1
YCGDLTLAAAIAGGCEFVVVPEVEFSREDLVNEIK	SSSHQRISVVEVMGRYCGDLTLAAAIAGGC	PEVEFSREDLVNEIKAGIAKGKKHAIVAIT	R	Y	C	I	K	A	4	1	1	2	2	0	5	3	0	2	3	1	0	2	1	1	1	0	1	5	0	0	35	1	3869.89	sp|P0A796|PFKA_ECOLI	sp|P0A796|PFKA_ECOLI	173	207	yes	yes	3	1.0523e-65	240.23	1	40972000	40972000			33	1
YSVSDMINR	GYLGLYEDRMVQLDRYSVSDMINRGGTFLG	MVQLDRYSVSDMINRGGTFLGSARFPEFRD	R	Y	S	N	R	G	0	1	1	1	0	0	0	0	0	1	0	0	1	0	0	2	0	0	1	1	0	0	9	0	1083.5	sp|P0A796|PFKA_ECOLI	sp|P0A796|PFKA_ECOLI	56	64	yes	yes	2	4.8663e-23	187.55	18	2449200000	2449200000			34	1
[truncated: 8 more columns]
