# Supplementary material for: Chemoproteomic identification of phosphohistidine acceptors: posttranslational activity regulation of a key glycolytic enzyme
Source: Royal Society of Chemistry journal article supplement (doi:10.1039/d5sc01024a), 2025-01-01
Supplement: d5sc01024a5.xlsx [file d5sc01024a5.xlsx]

## Sheet: STYH phosphorylation PTM (PfkA)
Proteins	Positions within proteins	Leading proteins	Protein	Protein names	Gene names	Fasta headers	Localization prob	Score diff	PEP	Score	Delta score	Score for localization	Localization prob 02_PfkA+pHis.raw	Score diff 02_PfkA+pHis.raw	PEP 02_PfkA+pHis.raw	Score 02_PfkA+pHis.raw	Diagnostic peak	Number of Phospho (STYH)	Amino acid	Sequence window	Modification window	Peptide window coverage	Phospho (STYH) Probabilities	Phospho (STYH) Score diffs	Position in peptide	Charge	Mass error [ppm]	Identification type 02_PfkA+pHis.raw	Intensity	Intensity___1	Intensity___2	Intensity___3	Ratio mod/base	Intensity 02_PfkA+pHis.raw	Ratio mod/base 02_PfkA+pHis.raw	Intensity 02_PfkA+pHis.raw___1	Intensity 02_PfkA+pHis.raw___2	Intensity 02_PfkA+pHis.raw___3	Occupancy 02_PfkA+pHis.raw	Occupancy ratio02_PfkA+pHis.raw	Occupancy error scale 02_PfkA+pHis.raw	Reverse	Potential contaminant	id	Protein group IDs	Positions	Position	Peptide IDs	Mod. peptide IDs
P0A796	250	P0A796	P0A796	ATP-dependent 6-phosphofructokinase isozyme 1	pfkA	sp|P0A796|PFKA_ECOLI ATP-dependent 6-phosphofructokinase isozyme 1 OS=Escherichia coli (strain K12) OX=83333 GN=pfkA PE=1 SV=1	0.933054	11.4418	0.0103653	43.651	36.362	43.651	0.933054	11.4418	0.0103653	43.651		1	H	IEKETGRETRATVLGHIQRGGSPVPYDRILA	X;X;X;X;X;X;X;X;X;X;X;X;X;X;X;Phospho (STYH);X;X;X;X;X;X;X;X;X;X;X;X;X;X;X	XXXXXXXXXXPPPPPPPPPXXXXXXXXXXXX	AT(0.067)VLGH(0.933)IQR	AT(-11)VLGH(11)IQR	6	2	-0.40707	By MS/MS	14074000	14074000	0	0	0.11939	14074000	0.11939	14074000	0	0						3	16	250	250	22	23
[truncated: 14 more columns]

## Sheet: Experimental Summary
Raw file	Experiment	Enzyme	Enzyme mode	Enzyme first search	Enzyme mode first search	Use enzyme first search	Variable modifications	Fixed modifications	Multi modifications	Variable modifications first search	Use variable modifications first search	Requantify	Multiplicity	Max. missed cleavages	Labels0	LC-MS run type	Time-dependent recalibration	MS	MS/MS	MS3	MS/MS submitted	MS/MS submitted (SIL)	MS/MS submitted (ISO)	MS/MS submitted (PEAK)	MS/MS identified	MS/MS identified (SIL)	MS/MS identified (ISO)	MS/MS identified (PEAK)	MS/MS identified [%]	MS/MS identified (SIL) [%]	MS/MS identified (ISO) [%]	MS/MS identified (PEAK) [%]	Peptide sequences identified	Peaks	Peaks sequenced	Peaks sequenced [%]	Peaks repeatedly sequenced	Peaks repeatedly sequenced [%]	Isotope patterns	Isotope patterns sequenced	Isotope patterns sequenced (z>1)	Isotope patterns sequenced [%]	Isotope patterns sequenced (z>1) [%]	Isotope patterns repeatedly sequenced	Isotope patterns repeatedly sequenced [%]	Recalibrated	Av. absolute mass deviation [ppm]	Mass standard deviation [ppm]	Av. absolute mass deviation [mDa]
02_PfkA+pHis	02_PfkA+pHis.raw	Trypsin/P	Specific			FALSE	Oxidation (M);Acetyl (Protein N-term);Phospho (STYH)	Carbamidomethyl (C)			FALSE	FALSE	1	2		Standard		9854	6217	0	7343	5091	0	2252	489	423	0	66	6.7	8.3	0	2.9	182	499424	4535	0.91	638	14	28489	3583	3413	13	17	730	20	+	0.38979	0.67118	0.25719
Total																		9854	6217	0	7343	5091	0	2252	489	423	0	66	6.7	8.3	0	2.9	182	499424					28489	3583	3413	13	17	730	20		0.38979	0.67118	0.25719
[truncated: 1 more columns]

## Sheet: peptides
Sequence	N-term cleavage window	C-term cleavage window	Amino acid before	First amino acid	Second amino acid	Second last amino acid	Last amino acid	Amino acid after	A Count	R Count	N Count	D Count	C Count	Q Count	E Count	G Count	H Count	I Count	L Count	K Count	M Count	F Count	P Count	S Count	T Count	W Count	Y Count	V Count	U Count	O Count	Length	Missed cleavages	Mass	Proteins	Leading razor protein	Start position	End position	Gene names	Protein names	Unique (Groups)	Unique (Proteins)	Charges	PEP	Score	Identification type 02_PfkA+pHis.raw	Experiment 02_PfkA+pHis.raw	Intensity	Intensity 02_PfkA+pHis.raw	Reverse
ATVLGHIQR	ELAHFIEKETGRETRATVLGHIQRGGSPVP	TGRETRATVLGHIQRGGSPVPYDRILASRM	R	A	T	Q	R	G	1	1	0	0	0	1	0	1	1	1	1	0	0	0	0	0	1	0	0	1	0	0	9	0	993.572	P0A796	P0A796	245	253	pfkA	ATP-dependent 6-phosphofructokinase isozyme 1	yes	yes	1;2	4.18e-31	197.6	By MS/MS	4	117880000	117880000
ATVLGHIQRGGSPVPYDR	ELAHFIEKETGRETRATVLGHIQRGGSPVP	LGHIQRGGSPVPYDRILASRMGAYAIDLLL	R	A	T	D	R	I	1	2	0	1	0	1	0	3	1	1	1	0	0	0	2	1	1	0	1	2	0	0	18	1	1922.01	P0A796	P0A796	245	262	pfkA	ATP-dependent 6-phosphofructokinase isozyme 1	yes	yes	3;4	0.00064636	51.193	By MS/MS	2	2458400	2458400
AVAIENLK	LGSARFPEFRDENIRAVAIENLKKRGIDAL	FRDENIRAVAIENLKKRGIDALVVIGGDGS	R	A	V	L	K	K	2	0	1	0	0	0	1	0	0	1	1	1	0	0	0	0	0	0	0	1	0	0	8	0	856.502	P0A796	P0A796	84	91	pfkA	ATP-dependent 6-phosphofructokinase isozyme 1	yes	yes	2	2.3239e-05	117.93	By MS/MS	1	21191000	21191000
AVAIENLKK	LGSARFPEFRDENIRAVAIENLKKRGIDAL	RDENIRAVAIENLKKRGIDALVVIGGDGSY	R	A	V	K	K	R	2	0	1	0	0	0	1	0	0	1	1	2	0	0	0	0	0	0	0	1	0	0	9	1	984.597	P0A796	P0A796	84	92	pfkA	ATP-dependent 6-phosphofructokinase isozyme 1	yes	yes	2	0.0031591	63.48	By MS/MS	1	12039000	12039000
CVGIQNEQLVHHDIIDAIENMK	GAYAIDLLLAGYGGRCVGIQNEQLVHHDII	QLVHHDIIDAIENMKRPFKGDWLDCAKKLY	R	C	V	M	K	R	1	0	2	2	1	2	2	1	2	4	1	1	1	0	0	0	0	0	0	2	0	0	22	0	2575.25	P0A796	P0A796	284	305	pfkA	ATP-dependent 6-phosphofructokinase isozyme 1	yes	yes	2;3;4	7.4546e-291	500.63	By MS/MS	9	12024000000	12024000000
EDLVNEIK	GGCEFVVVPEVEFSREDLVNEIKAGIAKGK	PEVEFSREDLVNEIKAGIAKGKKHAIVAIT	R	E	D	I	K	A	0	0	1	1	0	0	2	0	0	1	1	1	0	0	0	0	0	0	0	1	0	0	8	0	958.497	P0A796	P0A796	200	207	pfkA	ATP-dependent 6-phosphofructokinase isozyme 1	yes	yes	2	1.5625e-08	134.81	By MS/MS	10	10586000000	10586000000
FPEFRDENIR	SDMINRGGTFLGSARFPEFRDENIRAVAIE	LGSARFPEFRDENIRAVAIENLKKRGIDAL	R	F	P	I	R	A	0	2	1	1	0	0	2	0	0	1	0	0	0	2	1	0	0	0	0	0	0	0	10	1	1321.64	P0A796	P0A796	74	83	pfkA	ATP-dependent 6-phosphofructokinase isozyme 1	yes	yes	2	0.021491	30.254	By MS/MS	1	3615300	3615300
GDWLDCAK	HDIIDAIENMKRPFKGDWLDCAKKLY____	NMKRPFKGDWLDCAKKLY____________	K	G	D	A	K	K	1	0	0	2	1	0	0	1	0	0	1	1	0	0	0	0	0	1	0	0	0	0	8	0	963.412	P0A796	P0A796	310	317	pfkA	ATP-dependent 6-phosphofructokinase isozyme 1	yes	yes	2	0.00018524	107.32	By MS/MS	16	6.7715e+09	6.7715e+09
GDWLDCAKK	HDIIDAIENMKRPFKGDWLDCAKKLY____	MKRPFKGDWLDCAKKLY_____________	K	G	D	K	K	L	1	0	0	2	1	0	0	1	0	0	1	2	0	0	0	0	0	1	0	0	0	0	9	1	1091.51	P0A796	P0A796	310	318	pfkA	ATP-dependent 6-phosphofructokinase isozyme 1	yes	yes	2	0.013587	41.652	By MS/MS	1	29218000	29218000
GGSPVPYDR	TGRETRATVLGHIQRGGSPVPYDRILASRM	LGHIQRGGSPVPYDRILASRMGAYAIDLLL	R	G	G	D	R	I	0	1	0	1	0	0	0	2	0	0	0	0	0	0	2	1	0	0	1	1	0	0	9	0	946.451	P0A796	P0A796	254	262	pfkA	ATP-dependent 6-phosphofructokinase isozyme 1	yes	yes	2	2.1693e-06	124.98	By MS/MS	2	6.1767e+09	6.1767e+09
GIDALVVIGGDGSYMGAMR	DENIRAVAIENLKKRGIDALVVIGGDGSYM	LVVIGGDGSYMGAMRLTEMGFPCIGLPGTI	R	G	I	M	R	L	2	1	0	2	0	0	0	5	0	2	1	0	2	0	0	1	0	0	1	2	0	0	19	0	1880.91	P0A796	P0A796	94	112	pfkA	ATP-dependent 6-phosphofructokinase isozyme 1	yes	yes	2;3	5.4491e-41	217.91	By MS/MS	7	3.4291e+09	3.4291e+09
GTDYTIGFFTALSTVVEAIDR	FPCIGLPGTIDNDIKGTDYTIGFFTALSTV	GFFTALSTVVEAIDRLRDTSSSHQRISVVE	K	G	T	D	R	L	2	1	0	2	0	0	1	2	0	2	1	0	0	2	0	1	4	0	1	2	0	0	21	0	2275.14	P0A796	P0A796	133	153	pfkA	ATP-dependent 6-phosphofructokinase isozyme 1	yes	yes	2;3	8.8583e-57	210.36	By MS/MS	2	33629000	33629000
HAIVAITEHMCDVDELAHFIEK	DLVNEIKAGIAKGKKHAIVAITEHMCDVDE	EHMCDVDELAHFIEKETGRETRATVLGHIQ	K	H	A	E	K	E	3	0	0	2	1	0	3	0	3	3	1	1	1	1	0	0	1	0	0	2	0	0	22	0	2577.24	P0A796	P0A796	216	237	pfkA	ATP-dependent 6-phosphofructokinase isozyme 1	yes	yes	3;4;5	9.6514e-71	223.51	By MS/MS	5	11122000000	11122000000
IGVLTSGGDAPGMNAAIR	______________________________	LTSGGDAPGMNAAIRGVVRSALTEGLEVMG	K	I	G	I	R	G	3	1	1	1	0	0	0	4	0	2	1	0	1	0	1	1	1	0	0	1	0	0	18	0	1698.87	P0A796	P0A796	5	22	pfkA	ATP-dependent 6-phosphofructokinase isozyme 1	yes	yes	1;2;3	8.3726e-77	275.95	By MS/MS	37	6.571e+09	6.571e+09
ISVVEVMGR	EAIDRLRDTSSSHQRISVVEVMGRYCGDLT	SSSHQRISVVEVMGRYCGDLTLAAAIAGGC	R	I	S	G	R	Y	0	1	0	0	0	0	1	1	0	1	0	0	1	0	0	1	0	0	0	3	0	0	9	0	988.538	P0A796	P0A796	164	172	pfkA	ATP-dependent 6-phosphofructokinase isozyme 1	yes	yes	2	3.4062e-09	140.09	By MS/MS	8	1102400000	1102400000
KHAIVAITEHMCDVDELAHFIEK	EDLVNEIKAGIAKGKKHAIVAITEHMCDVD	EHMCDVDELAHFIEKETGRETRATVLGHIQ	K	K	H	E	K	E	3	0	0	2	1	0	3	0	3	3	1	2	1	1	0	0	1	0	0	2	0	0	23	1	2705.33	P0A796	P0A796	215	237	pfkA	ATP-dependent 6-phosphofructokinase isozyme 1	yes	yes	4;5	5.1435e-08	80.67	By MS/MS	3	35707000	35707000
KIGVLTSGGDAPGMNAAIR	______________________________	LTSGGDAPGMNAAIRGVVRSALTEGLEVMG	K	K	I	I	R	G	3	1	1	1	0	0	0	4	0	2	1	1	1	0	1	1	1	0	0	1	0	0	19	1	1826.97	P0A796	P0A796	4	22	pfkA	ATP-dependent 6-phosphofructokinase isozyme 1	yes	yes	2;3	1.1889e-05	79.489	By MS/MS	2	27050000	27050000
LTEMGFPCIGLPGTIDNDIK	LVVIGGDGSYMGAMRLTEMGFPCIGLPGTI	FPCIGLPGTIDNDIKGTDYTIGFFTALSTV	R	L	T	I	K	G	0	0	1	2	1	0	1	3	0	3	2	1	1	1	2	0	2	0	0	0	0	0	20	0	2190.07	P0A796	P0A796	113	132	pfkA	ATP-dependent 6-phosphofructokinase isozyme 1	yes	yes	2;3	2.6505e-94	259.72	By MS/MS	4	26020000000	26020000000
MGAYAIDLLLAGYGGR	RGGSPVPYDRILASRMGAYAIDLLLAGYGG	GAYAIDLLLAGYGGRCVGIQNEQLVHHDII	R	M	G	G	R	C	3	1	0	1	0	0	0	4	0	1	3	0	1	0	0	0	0	0	2	0	0	0	16	0	1639.84	P0A796	P0A796	268	283	pfkA	ATP-dependent 6-phosphofructokinase isozyme 1	yes	yes	2;3	5.8177e-73	240.8	By MS/MS	7	4433500000	4433500000
MVQLDRYSVSDMINR	VMGIYDGYLGLYEDRMVQLDRYSVSDMINR	MVQLDRYSVSDMINRGGTFLGSARFPEFRD	R	M	V	N	R	G	0	2	1	2	0	1	0	0	0	1	1	0	2	0	0	2	0	0	1	2	0	0	15	1	1825.88	P0A796	P0A796	50	64	pfkA	ATP-dependent 6-phosphofructokinase isozyme 1	yes	yes	3	0.020928	28.986	By MS/MS	1	924090	924090
SALTEGLEVMGIYDGYLGLYEDR	GDAPGMNAAIRGVVRSALTEGLEVMGIYDG	VMGIYDGYLGLYEDRMVQLDRYSVSDMINR	R	S	A	D	R	M	1	1	0	2	0	0	3	4	0	1	4	0	1	0	0	1	1	0	3	1	0	0	23	0	2563.22	P0A796	P0A796	27	49	pfkA	ATP-dependent 6-phosphofructokinase isozyme 1	yes	yes	2	2.5659e-100	314.12	By MS/MS	1	63619000	63619000
YCGDLTLAAAIAGGCEFVVVPEVEFSR	SSSHQRISVVEVMGRYCGDLTLAAAIAGGC	GGCEFVVVPEVEFSREDLVNEIKAGIAKGK	R	Y	C	S	R	E	4	1	0	1	2	0	3	3	0	1	2	0	0	2	1	1	1	0	1	4	0	0	27	0	2929.4	P0A796	P0A796	173	199	pfkA	ATP-dependent 6-phosphofructokinase isozyme 1	yes	yes	3	7.0665e-31	152.88	By MS/MS	1	52552000	52552000
YSVSDMINR	GYLGLYEDRMVQLDRYSVSDMINRGGTFLG	MVQLDRYSVSDMINRGGTFLGSARFPEFRD	R	Y	S	N	R	G	0	1	1	1	0	0	0	0	0	1	0	0	1	0	0	2	0	0	1	1	0	0	9	0	1083.5	P0A796	P0A796	56	64	pfkA	ATP-dependent 6-phosphofructokinase isozyme 1	yes	yes	2	3.3925e-40	203.57	By MS/MS	24	7.5843e+09	7.5843e+09
[truncated: 11 more columns]
