# Supplementary material for: Chemoproteomic identification of phosphohistidine acceptors: posttranslational activity regulation of a key glycolytic enzyme
Source: Royal Society of Chemistry journal article supplement (doi:10.1039/d5sc01024a), 2025-01-01
Supplement: d5sc01024a6.xlsx [file d5sc01024a6.xlsx]

## Sheet: Result summary
	Raw data for Figure 5D
	Graph information					Activity converted from slope			Progress curves										Enzyme activity comparison
			Value	Standard error		Activity (unit/mg)	Group name
	WT-1	Intecept	-0.00794	0.000178242		7.5495	WT
		slope	-5.03255e-05	1.43795e-07		3.933	WT
	WT-2	Intecept	0.00129	0.000338777		6.0585	WT
		slope	-2.62175e-05	2.85827e-07		0.246	dsixA
	WT-3	Intecept	0.000158388	0.000375903		0.375	dsixA
		slope	-4.03857e-05	2.48289e-07		-0.12116	dsixA
	dsixA-1	Intecept	-0.00718	0.000409146		4.1505	dsixA+SixA
		slope	-1.63696e-06	2.11607e-07		3.8985	dsixA+SixA
	dsixA-2	Intecept	-0.00324	0.000153339		6.0315	dsixA+SixA
		slope	-2.49947e-06	5.67995e-08
	dsixA-3	Intecept	-0.0056	8.67218e-05
		slope	8.07751e-07	5.12405e-08
	dsixA-1+SixA	Intecept	0.00238	0.000265092
		slope	-2.76734e-05	1.87734e-07
	dsixA-2 + SixA	Intecept	-0.00166	7.61733e-05
		slope	-2.59911e-05	5.86628e-08
	dsixA-3 + SixA	Intecept	0.00886	0.000191614
		slope	-4.02124e-05	1.50812e-07
	Raw data for Figure 5E
	Graph information					Activity converted from slope			Progress curves										Enzyme activity comparison
	Glucose-1	Intecept	0.13365	0.000168904		Activity (unit/mg)	Group name
		slope	-8.57424e-05	1.8927e-07		9.13047	Glu
	Glucose-1 + SixA	Intecept	0.13742	0.000170051		8.84607	Glu+SixA
		slope	-7.55648e-05	2.26695e-07		12.7076	Glu
	Glucose-2	Intecept	0.14759	0.000193801		13.8968	Glu+SixA
		slope	-9.28272e-05	2.3445e-07		9.15186	Glu
	Glucose-2 + SixA	Intecept	0.14351	0.000226962		7.62522	Glu+SixA
		slope	-9.09312e-05	3.33606e-07		2.23488	Gly
	Glucose-3	Intecept	0.13678	0.000321294		8.13713	Gly+SixA
		slope	-0.000116675	4.69082e-07		2.93144	Gly
	Glucose-3 + SixA	Intecept	0.14014	0.000479586		11.9527	Gly+SixA
		slope	-0.000124603	5.52895e-07		3.89238	Gly
	Glycerol-1	Intecept	0.1379	0.000165265		11.5682	Gly+SixA
		slope	-4.68566e-05	9.73488e-08
	Glycerol-1 + SixA	Intecept	0.14151	0.000228867
		slope	-8.62049e-05	2.8872e-07
	Glycerol-2	Intecept	0.14702	0.000202464
		slope	-5.15003e-05	1.24179e-07
	Glycerol-2 + SixA	Intecept	0.15484	0.0002117
		slope	-0.000111642	2.70744e-07
	Glycerol-3	Intecept	0.1377	0.00019215
		slope	-5.79066e-05	1.17822e-07
	Glycerol-3 + SixA	Intecept	0.14744	0.000226558
		slope	-0.000109079	2.64636e-07
	Raw data for Figure 5F
	Graph information					Activity converted from slope			Progress curves										Enzyme activity comparison
	dsixA-1	Intecept	0.11831	0.00031768		Activity (unit/mg)	Group name
		slope	-8.6073e-06	1.98969e-07		1.2911	dsixA
	dsixA-1 + SixA	Intecept	0.11812	0.000133116		4.67826	dsixA+SixA
		slope	-3.11884e-05	8.80201e-08		1.07714	dsixA
	dsixA-2	Intecept	0.11526	9.18471e-05		5.31021	dsixA+SixA
		slope	-7.18095e-06	5.92656e-08		2.42954	dsixA
	dsixA-2 + SixA	Intecept	0.11853	0.00013976		9.80502	dsixA+SixA
		slope	-3.54014e-05	9.12817e-08		6.29667	dptsHI dsixA
	dsixA-3	Intecept	0.15218	0.000319189		6.53573	dptsHI dsixA+SixA
		slope	-1.61969e-05	4.167e-07		6.63803	dptsHI dsixA
	dsixA-3 + SixA	Intecept	0.14578	0.000505075		6.95243	dptsHI dsixA+SixA
		slope	-6.53668e-05	6.42243e-07		11.1346	dptsHI dsixA
	dptsHI dsixA-1	Intecept	0.10859	0.000172728		10.662	dptsHI dsixA+SixA
		slope	-4.19778e-05	8.6651e-08
	dptsHI dsixA-1 + SixA	Intecept	0.114	0.000222891
		slope	-4.35715e-05	1.2726e-07
	dptsHI dsixA-2	Intecept	0.11071	0.00020084
		slope	-4.42535e-05	1.00991e-07
	dptsHI dsixA-2 + SixA	Intecept	0.11647	0.000221499
		slope	-4.63495e-05	1.1592e-07
	dptsHI dsixA-3	Intecept	0.14834	0.000131816
		slope	-7.42307e-05	1.69363e-07
	dptsHI dsixA-3 + SixA	Intecept	0.14728	0.000772839
		slope	-7.10801e-05	1.03381e-06
	Raw data for Figure S15
	Graph information					Activity converted from slope			Progress curves										Bar graph with p value
	dsixA-1	Intecept	0.16236	0.00029271		Activity (unit/mg)	Group name
		slope	-1.39137e-05	2.84849e-07		0.003165	dsixA
	dsixA-1 + SixA WT	Intecept	0.15987	0.000294207		12.9596	dsixA+SixA WT
		slope	-0.00010029	5.56006e-07		0.123855	dsixA+SixA H8A
	dsixA-1 + SixA H8A	Intecept	0.1606	0.000269322		0.159285	dsixA
		slope	-1.47183e-05	2.91573e-07		10.6768	dsixA+SixA WT
	dsixA-2	Intecept	0.15662	0.000251206		0.171135	dsixA+SixA H8A
		slope	-1.49545e-05	2.58933e-07		0.25938	dsixA
	dsixA-2 + SixA WT	Intecept	0.1576	0.000289008		12.8149	dsixA+SixA WT
		slope	-8.5071e-05	5.53909e-07		0.22875	dsixA+SixA H8A
	dsixA-2 + SixA H8A	Intecept	0.15827	0.000268904
		slope	-1.50335e-05	2.86096e-07
	dsixA-3	Intecept	0.15787	0.000300558
		slope	-1.56218e-05	3.28647e-07
	dsixA-3 + SixA WT	Intecept	0.15451	0.000382294
		slope	-9.9325e-05	5.86304e-07
	dsixA-3 + SixA H8A	Intecept	0.15841	0.000309049
		slope	-1.54176e-05	3.47108e-07

## Sheet: Data for Fig 5D
	WT-1			WT-2			WT-3			dsixA-1			dsixA-2			dsixA-3			No PfkA			dsixA-1			dsixA-2			dsixA-3			No PfkA
	0.382274	0.39129	0.391648	0.388571	0.402667	0.404957	0.3775	0.4018	0.3921	0.3923	0.3764	0.3818	0.3781	0.3905	0.4016	0.3845	0.3925	0.4064	0.3889	0.3961	0.3964	0.3381	0.3591	0.3625	0.3477	0.3485	0.35	0.3462	0.3625	0.3593	0.3476	0.3587	0.3467
	0.380032	0.389477	0.390408	0.389048	0.402	0.406078	0.3757	0.3987	0.3981	0.394	0.3789	0.385	0.3808	0.3921	0.4008	0.386	0.3903	0.3912	0.3913	0.3986	0.3976	0.3363	0.358	0.3588	0.347	0.3472	0.3497	0.3485	0.3646	0.3635	0.3477	0.3596	0.3468
	0.377218	0.386162	0.387307	0.386591	0.399471	0.403264	0.3736	0.3972	0.4021	0.3923	0.3785	0.3843	0.3793	0.3911	0.4	0.383	0.3904	0.3901	0.3906	0.397	0.3961	0.3347	0.3559	0.3572	0.3451	0.3454	0.3477	0.3459	0.3621	0.361	0.3467	0.3579	0.3451
	0.374475	0.383562	0.384779	0.384206	0.397158	0.397945	0.3715	0.3948	0.395	0.3908	0.3763	0.3827	0.3776	0.3892	0.399	0.382	0.3894	0.3891	0.3872	0.395	0.3946	0.3326	0.3534	0.3552	0.3425	0.3434	0.3477	0.3442	0.3596	0.3599	0.3457	0.3565	0.3441
	0.371446	0.380748	0.381535	0.382394	0.394773	0.395775	0.3688	0.3921	0.3956	0.3903	0.3746	0.3813	0.3766	0.3874	0.3976	0.3806	0.3882	0.3881	0.3906	0.3936	0.3928	0.3303	0.3514	0.3535	0.341	0.3415	0.3454	0.3415	0.3572	0.3578	0.3442	0.3557	0.3426
	0.368489	0.377433	0.378649	0.380009	0.392603	0.393533	0.3667	0.3899	0.3973	0.3896	0.3744	0.3794	0.3749	0.3863	0.3965	0.3789	0.3882	0.3918	0.3852	0.3928	0.3915	0.3286	0.3515	0.3518	0.3395	0.3395	0.3437	0.3388	0.3545	0.3565	0.3427	0.3543	0.3411
	0.365603	0.374261	0.376121	0.377624	0.390075	0.391649	0.3637	0.3869	0.3853	0.3883	0.3734	0.3787	0.3735	0.3848	0.394	0.3773	0.387	0.3846	0.3829	0.3912	0.39	0.3262	0.3473	0.3494	0.3376	0.3369	0.3419	0.3365	0.3518	0.3537	0.3417	0.3528	0.3401
	0.362502	0.371089	0.373164	0.375597	0.386974	0.39091	0.3613	0.3846	0.3926	0.3877	0.3727	0.377	0.3722	0.3833	0.3929	0.3764	0.3856	0.3833	0.3866	0.3896	0.3893	0.3244	0.345	0.3468	0.3351	0.3351	0.3398	0.3338	0.3493	0.3508	0.3404	0.3515	0.3387
	0.359616	0.368632	0.369992	0.373283	0.38509	0.387809	0.3589	0.3819	0.3888	0.3859	0.3708	0.3751	0.371	0.382	0.3909	0.3748	0.3842	0.3818	0.3805	0.3879	0.3871	0.3223	0.343	0.3453	0.3333	0.333	0.338	0.3316	0.3466	0.3471	0.3391	0.3502	0.3383
	0.356945	0.365031	0.367034	0.370755	0.382419	0.386426	0.3565	0.3792	0.3915	0.3845	0.3685	0.3742	0.3696	0.3808	0.3901	0.3732	0.3838	0.3806	0.3789	0.3868	0.386	0.3201	0.3406	0.3453	0.3314	0.3305	0.3357	0.3291	0.3443	0.3462	0.3379	0.3492	0.3368
	0.353988	0.36193	0.363934	0.368227	0.380034	0.384041	0.3537	0.377	0.3802	0.3831	0.3681	0.3737	0.3679	0.379	0.389	0.3719	0.3814	0.3794	0.3774	0.3854	0.3845	0.3179	0.3383	0.3437	0.3292	0.3284	0.3335	0.3266	0.3417	0.3431	0.3363	0.3475	0.3358
	0.350816	0.358901	0.36069	0.365699	0.377506	0.381012	0.3516	0.3744	0.3813	0.3813	0.3667	0.3708	0.3662	0.3771	0.3875	0.3708	0.3809	0.3971	0.3802	0.384	0.383	0.3157	0.3362	0.3429	0.3271	0.3261	0.3312	0.3239	0.3394	0.3401	0.335	0.3462	0.3349
	0.348287	0.355872	0.358305	0.363386	0.375264	0.378913	0.3489	0.3714	0.3769	0.3791	0.3657	0.369	0.3647	0.3757	0.3859	0.3692	0.3785	0.3767	0.3789	0.3821	0.3814	0.3137	0.3348	0.3421	0.325	0.3241	0.3285	0.3214	0.3365	0.3386	0.3344	0.345	0.3327
	0.345258	0.352629	0.35499	0.361358	0.37245	0.377458	0.3459	0.369	0.3758	0.3791	0.3638	0.3677	0.3633	0.3743	0.3848	0.3685	0.3772	0.3764	0.373	0.3806	0.3802	0.3116	0.3316	0.3399	0.323	0.3221	0.3257	0.3186	0.3337	0.3366	0.3324	0.3437	0.3307
	0.341657	0.349671	0.351961	0.358902	0.370136	0.37493	0.3437	0.3663	0.3632	0.3771	0.361	0.3661	0.3618	0.3725	0.3827	0.3659	0.3747	0.3783	0.376	0.3793	0.3785	0.3099	0.3295	0.3391	0.3208	0.3196	0.3233	0.3161	0.3315	0.3328	0.3312	0.3419	0.3297
	0.338914	0.346714	0.349075	0.356517	0.367894	0.374048	0.3411	0.3639	0.3658	0.3753	0.3592	0.365	0.3624	0.3708	0.3813	0.3644	0.3746	0.3987	0.3704	0.3777	0.3768	0.3073	0.3276	0.3369	0.3189	0.3174	0.3239	0.3141	0.3295	0.3305	0.3299	0.3408	0.3287
	0.336028	0.343685	0.345617	0.354204	0.365366	0.370948	0.3384	0.3612	0.3593	0.3737	0.3581	0.363	0.359	0.3696	0.3798	0.3634	0.3723	0.3705	0.3688	0.3762	0.3751	0.305	0.3259	0.3381	0.3168	0.3152	0.3208	0.3112	0.3259	0.3283	0.3285	0.3399	0.328
	0.332713	0.340298	0.343375	0.352248	0.362838	0.368706	0.3355	0.3582	0.3575	0.372	0.3581	0.3615	0.3573	0.3677	0.3778	0.3614	0.3702	0.3685	0.3669	0.3743	0.3739	0.3028	0.323	0.3343	0.3152	0.3133	0.3196	0.3084	0.3233	0.3262	0.3272	0.3382	0.3271
	0.329827	0.337627	0.339344	0.349648	0.360882	0.365963	0.3328	0.3561	0.355	0.3702	0.3566	0.3597	0.3558	0.3662	0.376	0.3601	0.3682	0.3672	0.3688	0.3732	0.3728	0.3007	0.3204	0.3295	0.3128	0.3108	0.3166	0.306	0.3207	0.3236	0.3257	0.3367	0.3243
	0.326942	0.33424	0.33653	0.347263	0.358068	0.363363	0.3304	0.3531	0.3494	0.3684	0.3547	0.3583	0.3544	0.3651	0.3762	0.3585	0.3674	0.3666	0.3668	0.3715	0.3705	0.2987	0.3185	0.3297	0.3105	0.3085	0.3154	0.3038	0.3181	0.3204	0.3245	0.3351	0.3247
	0.323626	0.331211	0.333573	0.344592	0.355469	0.359977	0.3275	0.3501	0.3478	0.3676	0.3538	0.3565	0.3525	0.3631	0.374	0.3573	0.3655	0.3642	0.3624	0.37	0.3692	0.2964	0.3159	0.3303	0.3088	0.3064	0.3128	0.3008	0.3158	0.3169	0.3228	0.3339	0.3221
	0.320454	0.328254	0.330472	0.342851	0.352869	0.358307	0.3248	0.3478	0.3472	0.3661	0.3518	0.3551	0.351	0.3616	0.372	0.3555	0.364	0.3645	0.3607	0.369	0.3681	0.2944	0.314	0.3279	0.3064	0.3042	0.3106	0.2984	0.3132	0.3129	0.3215	0.3323	0.3216
	0.317425	0.324939	0.3273	0.34018	0.350985	0.355636	0.3222	0.3447	0.3485	0.3647	0.35	0.3532	0.3495	0.3602	0.3697	0.3539	0.3624	0.3757	0.3592	0.3676	0.3666	0.2923	0.3117	0.3232	0.3044	0.302	0.3089	0.2956	0.3104	0.3101	0.32	0.331	0.3207
	0.314754	0.321981	0.324199	0.33801	0.348242	0.353823	0.3192	0.3421	0.3484	0.3628	0.3477	0.3523	0.3479	0.3584	0.3678	0.3526	0.3613	0.3597	0.3579	0.3656	0.3648	0.2899	0.3096	0.321	0.3019	0.2997	0.3066	0.2929	0.3073	0.3075	0.3188	0.3296	0.3186
	0.311296	0.318952	0.321385	0.335482	0.345714	0.350938	0.3171	0.3395	0.342	0.3617	0.3452	0.3506	0.3464	0.3567	0.3662	0.3511	0.3594	0.3583	0.3568	0.3652	0.3635	0.2875	0.3071	0.3196	0.2999	0.2976	0.3038	0.2908	0.3053	0.3049	0.3175	0.3283	0.3172
	0.308338	0.315565	0.318499	0.33324	0.343329	0.34934	0.3139	0.337	0.3365	0.359	0.3432	0.3488	0.3448	0.3556	0.3649	0.3491	0.3579	0.3716	0.3579	0.3625	0.3627	0.2854	0.3048	0.3144	0.2981	0.2953	0.3021	0.288	0.3019	0.3025	0.3156	0.327	0.3153
	0.305309	0.312608	0.315112	0.330998	0.340872	0.356042	0.3114	0.3339	0.3336	0.3571	0.3417	0.3465	0.3435	0.3538	0.3626	0.3482	0.3568	0.3571	0.3532	0.3606	0.3602	0.2845	0.3032	0.3111	0.2959	0.2928	0.2996	0.2854	0.2991	0.3001	0.3149	0.3253	0.3143
	0.302424	0.309579	0.312084	0.328756	0.33813	0.344999	0.3089	0.3315	0.3352	0.3567	0.3402	0.3458	0.3421	0.352	0.3615	0.3473	0.3546	0.3535	0.3518	0.3599	0.3587	0.2812	0.3	0.3073	0.2936	0.2908	0.2973	0.2826	0.2966	0.2972	0.3129	0.3237	0.3122
	0.299323	0.306622	0.308911	0.326156	0.335959	0.343616	0.3057	0.3285	0.3373	0.3553	0.3389	0.3438	0.3402	0.3504	0.3598	0.3449	0.3539	0.3676	0.3503	0.3577	0.357	0.2789	0.2978	0.3083	0.2913	0.2887	0.2951	0.2798	0.2939	0.2967	0.3124	0.322	0.3109
	0.296008	0.303306	0.305954	0.323914	0.333145	0.341803	0.3028	0.326	0.3306	0.3539	0.3371	0.3416	0.3385	0.3489	0.359	0.3433	0.3523	0.3508	0.3525	0.3562	0.3556	0.2767	0.2949	0.3047	0.2894	0.2861	0.2928	0.2774	0.291	0.2939	0.3103	0.3205	0.3091
	0.293193	0.300277	0.30314	0.321601	0.330975	0.339991	0.3004	0.3231	0.3304	0.352	0.3362	0.3401	0.337	0.3472	0.3578	0.3415	0.3506	0.3504	0.347	0.3544	0.3539	0.2743	0.2929	0.3032	0.287	0.2836	0.2905	0.2748	0.2885	0.2905	0.3087	0.3192	0.3075
	0.290021	0.296962	0.29961	0.319144	0.328375	0.337534	0.2976	0.32	0.3279	0.35	0.3351	0.3384	0.3355	0.3452	0.3544	0.3405	0.349	0.347	0.3499	0.3534	0.3523	0.2721	0.2904	0.2995	0.2853	0.2814	0.2878	0.2721	0.2854	0.2882	0.308	0.3178	0.3062
	0.286921	0.293933	0.296581	0.316545	0.325847	0.33565	0.2945	0.318	0.3251	0.3477	0.3334	0.3363	0.3342	0.3445	0.353	0.3387	0.347	0.3519	0.3444	0.3516	0.3504	0.2696	0.2882	0.2984	0.2826	0.2787	0.2852	0.2694	0.2824	0.2935	0.3062	0.316	0.3039
	0.284178	0.290976	0.293123	0.314375	0.323176	0.331691	0.2921	0.3152	0.3213	0.3473	0.3329	0.335	0.3326	0.3424	0.3512	0.3373	0.3465	0.3439	0.3432	0.3501	0.3491	0.2677	0.2859	0.2945	0.2805	0.2766	0.2833	0.2667	0.2802	0.2909	0.3048	0.3147	0.3031
	0.280863	0.287661	0.290094	0.312133	0.320719	0.328805	0.289	0.3118	0.3166	0.3457	0.3365	0.3337	0.3309	0.3406	0.3501	0.3351	0.3448	0.3423	0.3407	0.3497	0.3471	0.2655	0.2836	0.297	0.2785	0.2747	0.2812	0.264	0.2773	0.2815	0.3033	0.3135	0.301
	0.277405	0.284775	0.286921	0.309676	0.318334	0.326706	0.2865	0.3093	0.3186	0.3428	0.3323	0.3317	0.3292	0.3393	0.3482	0.3343	0.3435	0.3408	0.3391	0.3467	0.346	0.2631	0.281	0.2956	0.2761	0.2721	0.279	0.2613	0.2743	0.278	0.3021	0.312	0.2998
	0.27459	0.28146	0.283964	0.307077	0.316093	0.32425	0.2835	0.3065	0.3132	0.342	0.3345	0.3302	0.3271	0.3375	0.3463	0.3325	0.342	0.3567	0.3372	0.345	0.3442	0.2609	0.2788	0.2916	0.2741	0.2695	0.277	0.2588	0.2714	0.2737	0.3002	0.311	0.2988
	0.27149	0.277787	0.281364	0.304835	0.313493	0.321936	0.2814	0.3037	0.3136	0.3409	0.3312	0.3285	0.3268	0.3359	0.3461	0.3312	0.3398	0.362	0.3358	0.3434	0.3421	0.2585	0.2763	0.2919	0.2719	0.2673	0.2747	0.2564	0.2688	0.2718	0.2991	0.3089	0.2973
	0.268532	0.275044	0.27762	0.302235	0.310965	0.319766	0.2785	0.3005	0.3049	0.3387	0.3259	0.3271	0.3245	0.3345	0.3434	0.3293	0.3383	0.3366	0.3342	0.3422	0.345	0.2562	0.274	0.2899	0.2697	0.2649	0.2714	0.2535	0.2665	0.27	0.2977	0.3072	0.2946
	0.265646	0.271872	0.274591	0.300494	0.308365	0.31731	0.2756	0.298	0.3041	0.336	0.3297	0.3254	0.323	0.3324	0.3423	0.3277	0.338	0.3352	0.3328	0.3402	0.3476	0.2539	0.2716	0.2857	0.2673	0.2624	0.2701	0.2507	0.2636	0.2676	0.2958	0.3063	0.2936
	0.262474	0.268843	0.271705	0.297751	0.306052	0.316499	0.2723	0.2951	0.2987	0.3363	0.3275	0.3233	0.3211	0.3309	0.3401	0.3272	0.3356	0.3332	0.3313	0.3385	0.338	0.2514	0.2692	0.2758	0.2655	0.2601	0.2675	0.2481	0.2608	0.2649	0.295	0.3046	0.291
	0.25966	0.265456	0.268461	0.295366	0.303452	0.313398	0.2697	0.2924	0.2978	0.3346	0.3282	0.3217	0.3194	0.3293	0.3391	0.3248	0.3336	0.3315	0.3294	0.337	0.336	0.2495	0.267	0.2762	0.2628	0.258	0.2649	0.2452	0.2578	0.2613	0.2931	0.3027	0.2907
	0.25656	0.262427	0.265075	0.292695	0.300996	0.310799	0.2667	0.2893	0.2961	0.3323	0.3294	0.3199	0.3178	0.3274	0.3369	0.3233	0.3321	0.3298	0.3282	0.335	0.3345	0.2475	0.2649	0.2717	0.2608	0.2558	0.2639	0.2423	0.2547	0.259	0.2919	0.3014	0.2894
	0.253173	0.259398	0.262403	0.290811	0.298539	0.308557	0.2642	0.2866	0.2908	0.3304	0.3276	0.3181	0.3163	0.3261	0.3344	0.3214	0.3303	0.3305	0.3264	0.3337	0.333	0.2452	0.262	0.2705	0.2587	0.2527	0.2606	0.2397	0.2522	0.2562	0.2905	0.2999	0.2871
	0.250215	0.256441	0.258874	0.288426	0.296154	0.306959	0.2613	0.2839	0.2886	0.3295	0.3267	0.317	0.3149	0.3241	0.332	0.3199	0.329	0.3272	0.3245	0.3325	0.3313	0.2426	0.2598	0.2672	0.2565	0.2508	0.2587	0.2367	0.2493	0.2537	0.2896	0.2984	0.2856
	0.247759	0.252768	0.256274	0.28597	0.293626	0.304431	0.2583	0.2814	0.2842	0.3278	0.3256	0.3151	0.3131	0.3227	0.3303	0.3187	0.3272	0.3432	0.3233	0.3323	0.3297	0.2406	0.2573	0.2677	0.2542	0.2482	0.2569	0.2339	0.2465	0.2512	0.2873	0.2971	0.2846
	0.244372	0.24981	0.253317	0.28337	0.291026	0.302332	0.2555	0.2783	0.283	0.3251	0.3135	0.313	0.3111	0.3209	0.3282	0.3169	0.3255	0.3472	0.3217	0.3305	0.3282	0.2379	0.255	0.2632	0.2518	0.2457	0.2535	0.2314	0.2437	0.2468	0.2855	0.2954	0.2825
	0.241128	0.246924	0.250288	0.281271	0.288784	0.299947	0.2526	0.2756	0.2801	0.3249	0.3075	0.3116	0.31	0.3191	0.3266	0.3155	0.3249	0.322	0.3198	0.3277	0.3279	0.2354	0.2528	0.2556	0.2496	0.243	0.2488	0.2287	0.2408	0.2455	0.2841	0.2939	0.2813
	0.2381	0.243752	0.247545	0.279029	0.286328	0.297991	0.2499	0.2728	0.2759	0.3237	0.3065	0.3109	0.3081	0.3177	0.3249	0.3137	0.3217	0.3206	0.3186	0.326	0.3249	0.2329	0.2502	0.2527	0.2475	0.2407	0.2478	0.2263	0.238	0.2407	0.2828	0.2926	0.2795
	0.234856	0.240366	0.2438	0.276215	0.283657	0.296179	0.2474	0.2698	0.2744	0.3205	0.3134	0.3081	0.3067	0.3161	0.3233	0.312	0.3206	0.3188	0.3174	0.3247	0.3234	0.2307	0.2476	0.2511	0.2454	0.2388	0.246	0.2233	0.2355	0.2375	0.2815	0.291	0.2775
	0.231827	0.237122	0.240485	0.274188	0.281415	0.29315	0.2444	0.2672	0.2675	0.3184	0.3166	0.3068	0.3051	0.3144	0.3218	0.3107	0.3185	0.3175	0.3156	0.3231	0.3218	0.228	0.2452	0.2493	0.2432	0.2359	0.2429	0.2208	0.2328	0.2348	0.2795	0.2894	0.2757
	0.228726	0.234522	0.237671	0.271731	0.27903	0.291838	0.2417	0.2641	0.2692	0.3175	0.3151	0.3054	0.3036	0.3127	0.3207	0.3092	0.3174	0.3159	0.3142	0.3215	0.3199	0.2258	0.2426	0.2464	0.2415	0.234	0.241	0.2182	0.23	0.2323	0.2785	0.2876	0.2749
	0.225697	0.231064	0.234356	0.26906	0.276144	0.29067	0.2386	0.2616	0.2662	0.3172	0.3176	0.3035	0.3018	0.3109	0.3193	0.3076	0.3157	0.3194	0.3124	0.3202	0.3184	0.2237	0.2408	0.2465	0.2389	0.2316	0.2387	0.2154	0.2275	0.2298	0.2771	0.2864	0.2732
	0.222597	0.227749	0.23147	0.267104	0.273616	0.287999	0.2362	0.2583	0.2634	0.3139	0.3136	0.3018	0.3002	0.3094	0.3149	0.3058	0.3139	0.3124	0.3105	0.3181	0.3166	0.2211	0.2381	0.2452	0.2364	0.229	0.2364	0.2126	0.2239	0.2264	0.2753	0.2845	0.2711
	0.219711	0.225078	0.228298	0.264505	0.271159	0.28454	0.2332	0.2557	0.2645	0.3129	0.2953	0.2999	0.299	0.3076	0.314	0.3041	0.3132	0.3112	0.3087	0.3174	0.3154	0.2187	0.2357	0.2414	0.2341	0.2265	0.2334	0.2098	0.2214	0.2243	0.2738	0.2831	0.269
	0.216825	0.221548	0.225197	0.261977	0.268774	0.282227	0.2306	0.2534	0.2582	0.3115	0.2944	0.2985	0.2976	0.3059	0.3126	0.3033	0.3128	0.31	0.3076	0.3166	0.3138	0.2166	0.2333	0.2394	0.2321	0.2241	0.2315	0.2068	0.2188	0.2213	0.2723	0.2817	0.2676
	0.213581	0.218877	0.222383	0.259878	0.266604	0.280343	0.2277	0.2503	0.2602	0.3085	0.2929	0.2962	0.2958	0.3047	0.311	0.3015	0.3101	0.3082	0.3059	0.3135	0.312	0.2143	0.231	0.2384	0.2298	0.2217	0.2285	0.2042	0.216	0.2185	0.2707	0.2802	0.2659
	0.210767	0.215561	0.219211	0.256992	0.263575	0.278316	0.2249	0.2474	0.2571	0.3083	0.2944	0.2945	0.2941	0.3031	0.3092	0.2999	0.3085	0.3174	0.3095	0.3122	0.3109	0.2119	0.2286	0.238	0.2274	0.2198	0.2272	0.2016	0.2131	0.2158	0.2694	0.2784	0.265
	0.207524	0.212318	0.216253	0.254893	0.261262	0.275644	0.2219	0.2445	0.2459	0.3066	0.2927	0.2924	0.2924	0.3009	0.3073	0.2981	0.3069	0.3053	0.3027	0.3102	0.3091	0.2096	0.226	0.2347	0.225	0.2169	0.2251	0.1988	0.2105	0.2159	0.2679	0.2767	0.2639
	0.204781	0.209289	0.212867	0.25258	0.259163	0.275764	0.219	0.2418	0.2486	0.3055	0.298	0.2916	0.2912	0.2994	0.306	0.2964	0.3055	0.3036	0.306	0.3093	0.3076	0.2072	0.2239	0.2323	0.2229	0.2145	0.2235	0.1959	0.2073	0.2124	0.2661	0.2755	0.2615
	0.201823	0.206331	0.209766	0.250123	0.25642	0.273379	0.2163	0.2388	0.2438	0.3038	0.2949	0.2889	0.2898	0.2979	0.304	0.2953	0.3037	0.302	0.2999	0.3085	0.307	0.205	0.2212	0.2305	0.2209	0.2121	0.2205	0.1935	0.2045	0.2075	0.2649	0.2737	0.2595
	0.198508	0.202873	0.206594	0.247595	0.253821	0.271924	0.2135	0.236	0.2358	0.3024	0.2993	0.2874	0.2872	0.2961	0.3022	0.2933	0.3016	0.3002	0.2981	0.3064	0.3041	0.2024	0.2189	0.231	0.2187	0.2098	0.2195	0.1909	0.2017	0.2053	0.2634	0.2726	0.2581
	0.195551	0.199701	0.203279	0.245067	0.251221	0.268609	0.2107	0.2332	0.2344	0.2998	0.2994	0.2858	0.2864	0.2941	0.301	0.292	0.3011	0.2986	0.2966	0.3053	0.3026	0.2003	0.2165	0.2295	0.2165	0.2074	0.2149	0.1879	0.1994	0.2025	0.2622	0.271	0.2569
	0.19245	0.196744	0.200464	0.242897	0.249051	0.266224	0.2076	0.2306	0.2297	0.2986	0.2809	0.2843	0.2843	0.2928	0.2984	0.2901	0.299	0.297	0.2998	0.3028	0.3007	0.1979	0.2143	0.2227	0.2142	0.2051	0.2125	0.1853	0.1962	0.1996	0.2604	0.2693	0.2553
	0.189564	0.193929	0.197435	0.240655	0.246666	0.264125	0.2049	0.2275	0.2243	0.2962	0.2805	0.2826	0.2825	0.291	0.2969	0.2886	0.2982	0.2955	0.2941	0.3026	0.2993	0.1955	0.2116	0.2219	0.212	0.2025	0.2093	0.1827	0.1931	0.1972	0.2588	0.2677	0.2528
	0.186249	0.190757	0.194335	0.238342	0.243923	0.260381	0.2022	0.2248	0.2226	0.2959	0.2784	0.2811	0.2811	0.2895	0.2948	0.2874	0.2956	0.3124	0.2917	0.3005	0.2976	0.1932	0.2093	0.2229	0.2097	0.2	0.207	0.1798	0.1905	0.1962	0.2573	0.2663	0.2518
	0.18322	0.187728	0.191449	0.235957	0.241466	0.258353	0.1992	0.2222	0.2221	0.2937	0.2801	0.2796	0.2794	0.2877	0.2933	0.2857	0.2951	0.3055	0.2902	0.2992	0.2962	0.1907	0.2067	0.2201	0.2076	0.1976	0.2042	0.1774	0.1878	0.194	0.256	0.2645	0.2497
	0.180334	0.184485	0.188563	0.234001	0.239225	0.25604	0.1965	0.2191	0.2179	0.292	0.2845	0.2767	0.2777	0.2861	0.2918	0.284	0.2928	0.2908	0.2894	0.2981	0.2946	0.1886	0.2047	0.2173	0.2051	0.1957	0.203	0.1746	0.185	0.1898	0.2545	0.263	0.2482
	0.177448	0.181312	0.185534	0.231258	0.236768	0.253798	0.1938	0.2164	0.2122	0.2904	0.278	0.2753	0.2764	0.2843	0.2898	0.2826	0.2917	0.3067	0.2878	0.2958	0.2928	0.1861	0.2021	0.216	0.2032	0.1935	0.1997	0.1722	0.1821	0.1884	0.2527	0.2617	0.2471
	0.174205	0.178283	0.182434	0.229016	0.23424	0.252558	0.191	0.2139	0.2101	0.289	0.2703	0.274	0.2748	0.2826	0.2878	0.2812	0.2903	0.2881	0.286	0.2943	0.2915	0.1836	0.1997	0.2044	0.2005	0.1908	0.1964	0.1693	0.1795	0.1857	0.2512	0.26	0.246
	0.17182	0.175469	0.178975	0.226274	0.231783	0.250316	0.1885	0.2107	0.2098	0.2869	0.2694	0.2727	0.2732	0.2814	0.2859	0.2799	0.2895	0.2975	0.2847	0.293	0.2897	0.1813	0.1968	0.2053	0.1983	0.1881	0.1939	0.1669	0.177	0.1838	0.2496	0.2584	0.2431
	0.16829	0.172369	0.176161	0.22396	0.229541	0.250221	0.1853	0.208	0.2066	0.2865	0.2702	0.2716	0.2717	0.2792	0.2847	0.2778	0.287	0.286	0.2823	0.2893	0.2883	0.1793	0.1948	0.2059	0.1964	0.1876	0.1923	0.1641	0.1743	0.1801	0.2486	0.2566	0.2414
	0.165619	0.169626	0.173275	0.221289	0.226942	0.247121	0.1825	0.2052	0.2074	0.2849	0.2798	0.2689	0.2697	0.278	0.2831	0.2766	0.2856	0.2932	0.281	0.2898	0.2864	0.177	0.1925	0.2023	0.1941	0.1836	0.1898	0.1614	0.1716	0.1757	0.2468	0.2553	0.2399
	0.162661	0.166382	0.170032	0.219262	0.224772	0.243805	0.1795	0.2023	0.2082	0.2819	0.2788	0.2672	0.2684	0.2759	0.2813	0.2752	0.2842	0.2816	0.2791	0.2874	0.2845	0.1749	0.1896	0.1983	0.1918	0.1813	0.1887	0.159	0.169	0.1725	0.2451	0.2539	0.2378
	0.159704	0.163067	0.167074	0.216948	0.221886	0.244497	0.1767	0.1996	0.1975	0.2795	0.2748	0.2657	0.2668	0.2746	0.2788	0.2731	0.2833	0.2823	0.2778	0.2856	0.2834	0.1722	0.1874	0.1965	0.1896	0.1787	0.1857	0.1567	0.1668	0.1701	0.2434	0.2521	0.2365
	0.15646	0.160181	0.164403	0.214492	0.219715	0.242613	0.174	0.197	0.2016	0.2791	0.2598	0.2655	0.2649	0.2727	0.2777	0.2715	0.2818	0.2784	0.2766	0.2827	0.2818	0.17	0.1849	0.1933	0.1872	0.1763	0.1846	0.1542	0.1644	0.1675	0.242	0.2504	0.2346
	0.153861	0.156938	0.160873	0.212107	0.217402	0.238726	0.1715	0.1938	0.1963	0.2771	0.2589	0.2621	0.2634	0.271	0.2759	0.2707	0.2793	0.277	0.2785	0.2813	0.2801	0.1679	0.1831	0.1897	0.1856	0.174	0.1816	0.152	0.162	0.1656	0.2407	0.2489	0.2333
	0.150975	0.15398	0.157701	0.209507	0.214588	0.235339	0.1686	0.1913	0.193	0.2762	0.2607	0.261	0.2616	0.2694	0.2743	0.2687	0.2763	0.2754	0.2733	0.2797	0.2785	0.1657	0.1804	0.1839	0.1833	0.1714	0.1798	0.1498	0.1597	0.166	0.2391	0.2474	0.2318
	0.148089	0.150808	0.15503	0.207623	0.212417	0.233884	0.1658	0.1882	0.1916	0.2736	0.2683	0.2591	0.2601	0.2676	0.2725	0.2672	0.2747	0.2975	0.2708	0.2778	0.2768	0.1634	0.1783	0.1842	0.181	0.1692	0.176	0.148	0.1578	0.1606	0.2373	0.2456	0.23
	0.145203	0.148495	0.152287	0.205453	0.209818	0.230927	0.1632	0.186	0.1929	0.2723	0.2692	0.2572	0.2587	0.2661	0.272	0.2656	0.2735	0.2723	0.2696	0.2763	0.2757	0.1613	0.1758	0.1819	0.1795	0.1672	0.174	0.1458	0.1555	0.1604	0.2364	0.2441	0.2281
	0.142317	0.145394	0.14933	0.202996	0.207361	0.230187	0.1603	0.1828	0.1845	0.2708	0.2525	0.2555	0.2571	0.2643	0.2687	0.2636	0.2726	0.2708	0.273	0.2747	0.2733	0.1591	0.1742	0.1793	0.1768	0.1647	0.1729	0.1443	0.1542	0.1579	0.2342	0.2425	0.2267
	0.139574	0.14258	0.146658	0.200397	0.205048	0.22859	0.1579	0.1803	0.1825	0.2692	0.2534	0.2543	0.2561	0.2632	0.2671	0.2625	0.2712	0.269	0.2702	0.2736	0.2723	0.1572	0.1718	0.1784	0.1749	0.1628	0.1701	0.1428	0.153	0.1543	0.2328	0.2411	0.2256
	0.137118	0.140123	0.144345	0.198155	0.202663	0.227206	0.1548	0.1772	0.1789	0.268	0.2482	0.2517	0.2538	0.261	0.2655	0.2609	0.2704	0.2673	0.2651	0.2717	0.2705	0.1554	0.1696	0.1752	0.173	0.1606	0.1684	0.1417	0.1519	0.1527	0.2318	0.2395	0.2234
	0.135162	0.13781	0.141817	0.195841	0.200278	0.224249	0.1525	0.1747	0.1791	0.2662	0.2476	0.2506	0.2527	0.2596	0.2637	0.2598	0.2691	0.2662	0.2635	0.2706	0.2695	0.1535	0.1677	0.175	0.1712	0.1583	0.1667	0.1407	0.151	0.1512	0.2301	0.2381	0.2224
	0.133708	0.135783	0.139861	0.193599	0.197678	0.222866	0.1501	0.1721	0.1767	0.2654	0.2454	0.2499	0.2506	0.2579	0.2627	0.2577	0.2676	0.2695	0.2646	0.2687	0.2672	0.1521	0.1659	0.1741	0.1692	0.1567	0.1649	0.1405	0.1505	0.1499	0.2282	0.2363	0.221
	0.132897	0.135043	0.13855	0.191215	0.195508	0.21998	0.1477	0.1695	0.1734	0.2622	0.2436	0.2476	0.2489	0.256	0.2606	0.2564	0.266	0.2627	0.2602	0.2671	0.2658	0.1501	0.164	0.1718	0.1668	0.1547	0.1622	0.1397	0.1497	0.1488	0.2267	0.235	0.2198
	0.133088	0.134877	0.137739	0.189116	0.192837	0.216665	0.146	0.1669	0.1727	0.2618	0.2423	0.2457	0.2472	0.2549	0.2588	0.2552	0.2636	0.2623	0.2593	0.2653	0.2639	0.1487	0.1623	0.1693	0.1652	0.153	0.16	0.1391	0.1496	0.1479	0.225	0.2335	0.2154
	0.132921	0.13471	0.137715	0.186588	0.190452	0.213779	0.1446	0.1647	0.1714	0.2601	0.2461	0.2446	0.2462	0.2529	0.2571	0.2532	0.2618	0.2599	0.2572	0.2636	0.2626	0.1475	0.1614	0.1718	0.1637	0.1512	0.1608	0.1392	0.1493	0.1474	0.2237	0.2313	0.216
	0.132826	0.134472	0.137835	0.184203	0.188353	0.211465	0.1441	0.1628	0.1658	0.2577	0.2533	0.2427	0.2444	0.2511	0.256	0.2515	0.2599	0.2613	0.2562	0.2623	0.2608	0.1465	0.16	0.1698	0.1618	0.1493	0.1587	0.1388	0.149	0.1473	0.2222	0.2301	0.2151
	0.132945	0.134806	0.137024	0.18239	0.18561	0.210082	0.1438	0.1618	0.1677	0.2573	0.253	0.2407	0.2427	0.2494	0.2542	0.2505	0.259	0.2565	0.255	0.2609	0.2594	0.1458	0.159	0.1691	0.1603	0.1482	0.1556	0.1386	0.1487	0.1468	0.2205	0.2285	0.2111
	0.132993	0.134925	0.137287	0.180077	0.183511	0.209271	0.1438	0.1614	0.1661	0.2552	0.2356	0.2394	0.2413	0.248	0.2527	0.2489	0.2577	0.2548	0.253	0.2587	0.2574	0.1452	0.1585	0.1684	0.1594	0.1472	0.1563	0.1385	0.1488	0.1464	0.2191	0.227	0.2105
	0.133542	0.135045	0.137692	0.177477	0.180912	0.205885	0.1436	0.161	0.1615	0.2523	0.2341	0.237	0.2395	0.2462	0.2523	0.2469	0.2558	0.2536	0.2517	0.2573	0.2566	0.1447	0.1578	0.1709	0.1582	0.1466	0.1551	0.1384	0.1485	0.1469	0.2176	0.2252	0.208
	0.133375	0.135307	0.137454	0.175665	0.178241	0.203428	0.1436	0.1609	0.1615	0.2532	0.2357	0.2346	0.2381	0.2447	0.2483	0.2457	0.2537	0.252	0.2496	0.2559	0.2548	0.1444	0.1572	0.1712	0.1573	0.1455	0.1547	0.138	0.1484	0.1463	0.216	0.2239	0.207
	0.133566	0.135427	0.138074	0.173423	0.176356	0.201472	0.1435	0.1609	0.1612	0.2512	0.2308	0.2332	0.2363	0.243	0.2466	0.2442	0.2517	0.2506	0.2483	0.2551	0.2537	0.144	0.1572	0.1698	0.1571	0.1457	0.1529	0.1385	0.1485	0.146	0.2149	0.2228	0.2063
	0.133757	0.135976	0.137764	0.17068	0.173757	0.200018	0.1435	0.1607	0.1602	0.2474	0.2348	0.2312	0.2354	0.2414	0.2461	0.2426	0.2508	0.2655	0.2511	0.253	0.2517	0.144	0.1568	0.1684	0.1563	0.1448	0.1518	0.1377	0.1482	0.1458	0.2133	0.2206	0.2047
	0.134235	0.135594	0.138242	0.168152	0.171587	0.197704	0.1435	0.1605	0.1585	0.2475	0.2441	0.2297	0.2334	0.2398	0.2444	0.2412	0.2485	0.2471	0.2453	0.2513	0.2497	0.1439	0.1564	0.1686	0.1557	0.1443	0.1515	0.1381	0.1482	0.1462	0.2116	0.2189	0.2028
	0.134068	0.135857	0.138433	0.165982	0.168987	0.194818	0.1436	0.1604	0.1595	0.2462	0.2258	0.229	0.2319	0.238	0.2412	0.2396	0.2468	0.2456	0.2476	0.2496	0.2486	0.1435	0.1567	0.1701	0.1553	0.1443	0.1515	0.1378	0.1481	0.1456	0.2103	0.2173	0.2013
	0.134044	0.136334	0.138051	0.163883	0.167031	0.194866	0.1435	0.1605	0.1598	0.2455	0.2268	0.2267	0.2303	0.2364	0.2398	0.2379	0.2458	0.2442	0.2421	0.2485	0.2467	0.1432	0.1557	0.1666	0.1548	0.1435	0.1517	0.1377	0.148	0.1456	0.2082	0.2157	0.1992
	0.134378	0.136239	0.138672	0.161283	0.164503	0.191193	0.1434	0.1606	0.1607	0.2431	0.2231	0.2254	0.2285	0.2348	0.2384	0.2366	0.2452	0.2426	0.2404	0.247	0.2453	0.1432	0.1556	0.1652	0.1544	0.1436	0.1517	0.1377	0.1477	0.1456	0.2071	0.2141	0.1977
	0.134498	0.136358	0.138791	0.159399	0.16219	0.189095	0.1432	0.1603	0.1625	0.2407	0.2205	0.2239	0.2266	0.2329	0.2367	0.2345	0.2431	0.2411	0.2389	0.2449	0.2432	0.143	0.1558	0.1644	0.1544	0.1431	0.1526	0.1375	0.1476	0.1453	0.2053	0.2128	0.196
	0.134689	0.136335	0.138624	0.157086	0.159876	0.186781	0.1431	0.1605	0.1628	0.2378	0.2193	0.2219	0.2249	0.231	0.2343	0.233	0.2415	0.2391	0.2369	0.2448	0.2417	0.1431	0.1554	0.165	0.1544	0.1436	0.1536	0.1378	0.1479	0.1475	0.204	0.2113	0.1945
	0.135023	0.136669	0.139245	0.154915	0.157778	0.184969	0.1431	0.1604	0.1625	0.238	0.223	0.221	0.2236	0.2299	0.2329	0.232	0.2408	0.2376	0.2362	0.2421	0.2408	0.1432	0.1556	0.1665	0.1546	0.1433	0.1535	0.1374	0.1478	0.1477	0.2024	0.2096	0.1928
	0.135286	0.137003	0.139364	0.152674	0.155464	0.18287	0.1431	0.1599	0.1627	0.2371	0.2298	0.2182	0.222	0.2282	0.2317	0.23	0.2381	0.2361	0.234	0.2406	0.2392	0.143	0.1553	0.1646	0.154	0.1429	0.1526	0.1375	0.1477	0.1458	0.201	0.2081	0.1913
	0.135477	0.137051	0.139126	0.150646	0.153151	0.181057	0.1432	0.1602	0.1635	0.2347	0.2144	0.2171	0.2204	0.2265	0.2293	0.2288	0.2374	0.235	0.2332	0.2389	0.2373	0.1426	0.1549	0.1595	0.1538	0.1427	0.1503	0.1375	0.1479	0.1457	0.1993	0.2065	0.1879
	0.135453	0.13717	0.139746	0.148476	0.151052	0.178816	0.1431	0.1606	0.1621	0.2338	0.2151	0.2154	0.219	0.2248	0.2279	0.2271	0.2354	0.2332	0.2316	0.239	0.2357	0.1428	0.1548	0.1636	0.1537	0.1427	0.1538	0.1375	0.1482	0.1459	0.1977	0.2049	0.1881
	0.135715	0.137218	0.139866	0.146091	0.149311	0.176788	0.1435	0.1605	0.1615	0.2319	0.2275	0.2137	0.2176	0.2233	0.2263	0.2257	0.2348	0.2318	0.2302	0.2374	0.2341	0.1427	0.1549	0.1623	0.1545	0.1428	0.1526	0.1375	0.1477	0.1455	0.1965	0.2034	0.1876
	0.135763	0.137552	0.139914	0.144422	0.147999	0.176407	0.1434	0.1602	0.1633	0.2312	0.2264	0.2111	0.216	0.2216	0.225	0.2241	0.2341	0.2303	0.2316	0.2344	0.2322	0.1433	0.155	0.1606	0.1537	0.1427	0.1513	0.1375	0.1476	0.1455	0.195	0.2018	0.186
	0.136169	0.138101	0.140248	0.142609	0.146902	0.172805	0.1429	0.1602	0.1624	0.2291	0.2197	0.2095	0.2139	0.22	0.2235	0.2226	0.2317	0.2485	0.2313	0.2359	0.2309	0.143	0.1549	0.1612	0.1536	0.1426	0.1502	0.1373	0.1475	0.1455	0.1935	0.2004	0.1853
	0.136289	0.137791	0.140367	0.141226	0.146235	0.170778	0.1429	0.16	0.1611	0.227	0.2098	0.2076	0.213	0.218	0.2216	0.2211	0.2314	0.2286	0.2247	0.2337	0.2295	0.141226	0.146235	0.170778	0.1429	0.16	0.1611	0.227	0.2098	0.2076	0.213	0.218	0.2216
	0.136408	0.138054	0.143277	0.140057	0.146068	0.168465	0.1431	0.1601	0.1614	0.2255	0.2045	0.2061	0.211	0.2166	0.219	0.2196	0.2286	0.2255	0.2234	0.2301	0.2278	0.140057	0.146068	0.168465	0.1431	0.1601	0.1614	0.2255	0.2045	0.2061	0.211	0.2166	0.219
	0.136599	0.138388	0.141679	0.139318	0.146044	0.166795	0.1432	0.1603	0.1605	0.2239	0.203	0.2049	0.2097	0.215	0.2169	0.2186	0.228	0.224	0.2217	0.2286	0.2259	0.139318	0.146044	0.166795	0.1432	0.1603	0.1605	0.2239	0.203	0.2049	0.2097	0.215	0.2169
	0.13679	0.138436	0.141012	0.13908	0.146092	0.166486	0.1429	0.1598	0.1593	0.2227	0.2017	0.2036	0.2078	0.2133	0.2154	0.217	0.227	0.2225	0.2204	0.2293	0.2246	0.13908	0.146092	0.166486	0.1429	0.1598	0.1593	0.2227	0.2017	0.2036	0.2078	0.2133	0.2154
	0.136838	0.13877	0.140917	0.138842	0.146069	0.164101	0.1429	0.16	0.1604	0.2205	0.1999	0.2023	0.2062	0.2116	0.2143	0.2156	0.2243	0.2403	0.2186	0.228	0.2231	0.138842	0.146069	0.164101	0.1429	0.16	0.1604	0.2205	0.1999	0.2023	0.2062	0.2116	0.2143
	0.137029	0.138889	0.141322	0.138889	0.146331	0.161573	0.1429	0.1603	0.16	0.2197	0.1976	0.2002	0.2048	0.2105	0.2127	0.2138	0.2235	0.2197	0.2172	0.2248	0.2217	0.138889	0.146331	0.161573	0.1429	0.1603	0.16	0.2197	0.1976	0.2002	0.2048	0.2105	0.2127
	0.137506	0.139295	0.1418	0.139224	0.146665	0.159116	0.1432	0.16	0.1569	0.2163	0.1961	0.1973	0.2031	0.2081	0.2101	0.212	0.2206	0.2228	0.2156	0.2219	0.2198	0.139224	0.146665	0.159116	0.1432	0.16	0.1569	0.2163	0.1961	0.1973	0.2031	0.2081	0.2101
	0.137411	0.139128	0.14149	0.139558	0.14657	0.156946	0.1431	0.1602	0.1579	0.2157	0.1949	0.1959	0.2016	0.207	0.2087	0.2106	0.2184	0.2166	0.2142	0.2203	0.2186	0.139558	0.14657	0.156946	0.1431	0.1602	0.1579	0.2157	0.1949	0.1959	0.2016	0.207	0.2087
	0.137745	0.139391	0.141824	0.139606	0.146904	0.155348	0.1428	0.16	0.1593	0.2156	0.1949	0.1941	0.1999	0.2052	0.2077	0.2089	0.2168	0.2146	0.213	0.2188	0.2169	0.139606	0.146904	0.155348	0.1428	0.16	0.1593	0.2156	0.1949	0.1941	0.1999	0.2052	0.2077
	0.137793	0.139439	0.142158	0.139367	0.146881	0.156755	0.1433	0.16	0.1599	0.2128	0.1919	0.1925	0.1988	0.2036	0.2064	0.208	0.216	0.2132	0.2112	0.2174	0.2153	0.139367	0.146881	0.156755	0.1433	0.16	0.1599	0.2128	0.1919	0.1925	0.1988	0.2036	0.2064
	0.138199	0.140131	0.142492	0.139487	0.147143	0.153583	0.1432	0.1599	0.161	0.2101	0.19	0.1908	0.1969	0.2019	0.2037	0.2061	0.2141	0.2365	0.2096	0.2158	0.2135	0.139487	0.147143	0.153583	0.1432	0.1599	0.161	0.2101	0.19	0.1908	0.1969	0.2019	0.2037
	0.138247	0.140179	0.142826	0.139678	0.147334	0.15034	0.1427	0.16	0.1613	0.2098	0.1877	0.189	0.1953	0.2002	0.2025	0.205	0.2122	0.2201	0.2085	0.2139	0.2122	0.139678	0.147334	0.15034	0.1427	0.16	0.1613	0.2098	0.1877	0.189	0.1953	0.2002	0.2025
	0.138509	0.140083	0.142445	0.139869	0.147382	0.149028	0.1429	0.1603	0.1606	0.2091	0.1878	0.1877	0.1941	0.1986	0.2013	0.2034	0.2112	0.2095	0.2067	0.212	0.2107	0.139869	0.147382	0.149028	0.1429	0.1603	0.1606	0.2091	0.1878	0.1877	0.1941	0.1986	0.2013

## Sheet: Data for Fig 5E
	No PfkA			Glucose-1			Glucose-1 + SixA			Glucose-2			Glucose-2 + SixA			Glucose-3			Glucose-3 + SixA			Glycerol-1			Glycerol-1 + SixA			Glycerol-2			Glycerol-2 + SixA			Glycerol-3			Glycerol-3 + SixA
	0.3254	0.3452	0.3349	0.3657	0.3895	0.3729	0.3881	0.379	0.3793	0.3405	0.3433	0.3538	0.329	0.3484	0.3424	0.335	0.3339	0.3292	0.3256	0.3459	0.3455	0.3301	0.3364	0.3388	0.3263	0.3469	0.3442	0.3433	0.3418	0.3584	0.3495	0.3501	0.3635	0.3298	0.3442	0.3366	0.3382	0.3501	0.3488
	0.3235	0.3425	0.334	0.3606	0.3856	0.368	0.3837	0.3752	0.3749	0.3367	0.3388	0.3502	0.3251	0.3447	0.3388	0.3307	0.3339	0.325	0.3201	0.3387	0.3406	0.3286	0.3346	0.337	0.3217	0.3445	0.3403	0.3406	0.3384	0.3551	0.3445	0.3446	0.3594	0.3273	0.3406	0.333	0.3334	0.345	0.3449
	0.3222	0.3402	0.3318	0.355	0.379	0.3628	0.3788	0.3693	0.3697	0.3327	0.3351	0.3453	0.3214	0.3407	0.3346	0.3257	0.3233	0.3205	0.3153	0.3332	0.335	0.3266	0.3317	0.3341	0.3181	0.3392	0.3361	0.3381	0.3355	0.3519	0.3402	0.3411	0.3543	0.3243	0.3373	0.3299	0.3293	0.3404	0.3402
	0.3207	0.3382	0.3303	0.35	0.3737	0.3572	0.3761	0.3648	0.3649	0.3287	0.3313	0.3415	0.317	0.3362	0.332	0.3214	0.3194	0.3153	0.3102	0.3277	0.3294	0.324	0.3295	0.3321	0.314	0.3367	0.3327	0.3359	0.333	0.3489	0.3353	0.3357	0.3502	0.3212	0.3345	0.3274	0.3253	0.3355	0.3354
	0.3193	0.3375	0.3285	0.3452	0.3694	0.3544	0.3711	0.3607	0.3601	0.3252	0.328	0.3384	0.3133	0.333	0.3278	0.3169	0.3166	0.311	0.3062	0.3229	0.3243	0.3219	0.3285	0.33	0.3105	0.3335	0.329	0.3334	0.3304	0.3467	0.3314	0.331	0.3455	0.319	0.3318	0.3252	0.3215	0.331	0.3312
	0.3179	0.3354	0.3273	0.3405	0.3686	0.3474	0.3669	0.3557	0.3561	0.3217	0.3243	0.3343	0.3106	0.3286	0.3244	0.3128	0.3098	0.3065	0.3017	0.3175	0.3194	0.3207	0.3257	0.3279	0.3073	0.3282	0.3257	0.3313	0.3286	0.3442	0.3268	0.3268	0.3417	0.3164	0.3294	0.3229	0.3173	0.3278	0.3279
	0.3162	0.334	0.3259	0.3367	0.36	0.3429	0.3637	0.3518	0.3526	0.3184	0.3204	0.3305	0.3062	0.3249	0.3208	0.3083	0.305	0.3024	0.2966	0.3124	0.3149	0.3178	0.3258	0.3257	0.3042	0.3246	0.3225	0.3291	0.3262	0.3424	0.3227	0.322	0.3369	0.3142	0.3261	0.3203	0.3134	0.323	0.3234
	0.3152	0.3327	0.3246	0.3325	0.3561	0.3393	0.3659	0.347	0.348	0.3152	0.3173	0.3273	0.3029	0.3216	0.317	0.3047	0.3091	0.2983	0.2935	0.3088	0.3101	0.3165	0.3219	0.3238	0.3009	0.3227	0.3192	0.3283	0.3244	0.34	0.319	0.3181	0.3328	0.3123	0.3247	0.318	0.3095	0.3188	0.3191
	0.3138	0.331	0.3244	0.3281	0.3518	0.3342	0.356	0.3451	0.3441	0.3117	0.3141	0.3237	0.2992	0.3181	0.3137	0.2998	0.2964	0.2935	0.2888	0.3034	0.3053	0.3145	0.32	0.3216	0.2978	0.3192	0.3159	0.3256	0.322	0.3377	0.3147	0.3149	0.3289	0.3096	0.3222	0.3154	0.3053	0.3145	0.3147
	0.3124	0.3298	0.322	0.3241	0.3463	0.3292	0.3516	0.3392	0.3395	0.308	0.3104	0.3205	0.296	0.3147	0.3101	0.2963	0.3072	0.2894	0.2853	0.299	0.3005	0.3126	0.3182	0.32	0.2945	0.3199	0.3129	0.3233	0.3203	0.3358	0.3111	0.3103	0.3246	0.3075	0.3198	0.3148	0.3017	0.3108	0.3109
	0.3111	0.3284	0.3206	0.3203	0.3427	0.3256	0.3491	0.336	0.3358	0.3045	0.3071	0.3171	0.2927	0.3222	0.3068	0.292	0.2879	0.2852	0.2795	0.2945	0.2958	0.3107	0.3167	0.3179	0.2915	0.3153	0.3094	0.3211	0.318	0.3333	0.3073	0.3065	0.3206	0.3052	0.3175	0.3112	0.2978	0.3063	0.3073
	0.3099	0.3274	0.3195	0.3153	0.3385	0.3201	0.3438	0.332	0.3324	0.3013	0.3039	0.3129	0.2895	0.3185	0.3032	0.2878	0.2836	0.2808	0.2753	0.2901	0.2911	0.3094	0.3158	0.3161	0.2882	0.3115	0.3063	0.319	0.3162	0.3316	0.3031	0.3019	0.3167	0.3031	0.315	0.3088	0.2937	0.3023	0.3026
	0.3088	0.326	0.3182	0.3116	0.3338	0.3161	0.3423	0.328	0.3283	0.2982	0.3007	0.3098	0.2868	0.3157	0.3002	0.2837	0.2796	0.2771	0.2711	0.3026	0.2864	0.3078	0.3124	0.3144	0.2857	0.309	0.3031	0.3178	0.3142	0.3294	0.2991	0.2983	0.3132	0.301	0.313	0.3068	0.2902	0.2988	0.2986
	0.3075	0.3247	0.3168	0.3066	0.3286	0.3122	0.3365	0.324	0.3242	0.295	0.2971	0.3065	0.283	0.3122	0.2968	0.2796	0.2786	0.2729	0.267	0.2807	0.2821	0.3059	0.3106	0.3126	0.2823	0.3034	0.3	0.3155	0.3121	0.3273	0.2956	0.2939	0.3087	0.2986	0.3105	0.3042	0.2863	0.2943	0.295
	0.3065	0.3236	0.3158	0.3023	0.3302	0.3073	0.334	0.3197	0.3204	0.2926	0.2943	0.3032	0.2797	0.3084	0.2936	0.2757	0.2723	0.2689	0.2638	0.2764	0.2778	0.3038	0.3092	0.3109	0.2795	0.3005	0.2972	0.3139	0.3102	0.3258	0.2916	0.29	0.3046	0.2966	0.3091	0.3026	0.2828	0.2911	0.2913
	0.3052	0.3222	0.3155	0.2978	0.3196	0.3036	0.3306	0.3162	0.3164	0.2885	0.2909	0.3	0.2763	0.3054	0.2899	0.2716	0.2676	0.265	0.2584	0.2718	0.2733	0.3028	0.3077	0.3094	0.2765	0.2975	0.2938	0.3118	0.3083	0.3236	0.2878	0.2862	0.3008	0.2949	0.3068	0.3003	0.2787	0.2871	0.2872
	0.3039	0.3212	0.3256	0.2975	0.3159	0.2985	0.3261	0.3129	0.3129	0.2854	0.2877	0.2966	0.273	0.3022	0.2867	0.2677	0.2632	0.2607	0.2542	0.2674	0.2688	0.3007	0.3058	0.3077	0.2738	0.2936	0.2906	0.3103	0.3066	0.3212	0.2841	0.2872	0.2967	0.2926	0.3047	0.2984	0.2753	0.2831	0.2836
	0.3025	0.3194	0.322	0.2898	0.3123	0.2942	0.3233	0.3085	0.3087	0.2821	0.2839	0.293	0.2698	0.2986	0.283	0.2637	0.2587	0.2572	0.2497	0.263	0.2641	0.2991	0.3043	0.3055	0.2702	0.2908	0.2876	0.3079	0.305	0.319	0.28	0.2782	0.2927	0.2906	0.3022	0.2958	0.2712	0.2788	0.2799
	0.3014	0.3185	0.3172	0.2858	0.3085	0.2905	0.3186	0.305	0.3053	0.279	0.2812	0.2901	0.2667	0.2961	0.2804	0.26	0.2669	0.253	0.2458	0.2587	0.2597	0.2973	0.3025	0.3041	0.2678	0.292	0.2854	0.3066	0.3025	0.3176	0.2765	0.2748	0.2889	0.2884	0.3003	0.2939	0.268	0.2756	0.2761
	0.3003	0.3171	0.3189	0.2811	0.3027	0.2855	0.3146	0.3007	0.3015	0.2757	0.2783	0.2868	0.2638	0.2931	0.2771	0.2565	0.2512	0.2487	0.2419	0.2572	0.2554	0.2957	0.3007	0.3024	0.2647	0.2859	0.282	0.3047	0.3009	0.3156	0.2729	0.2708	0.2849	0.2864	0.2982	0.2918	0.2641	0.2716	0.2721
	0.2991	0.3151	0.3085	0.2775	0.2989	0.2818	0.3113	0.2971	0.2976	0.2723	0.2752	0.2832	0.2604	0.2897	0.2736	0.2518	0.2467	0.2448	0.2377	0.2499	0.2507	0.2937	0.2991	0.3004	0.2619	0.2819	0.2805	0.3025	0.2987	0.3139	0.2689	0.2662	0.2807	0.2843	0.296	0.2898	0.2647	0.2674	0.2684
	0.298	0.3143	0.3078	0.2729	0.2951	0.2771	0.3091	0.2934	0.2938	0.2696	0.2719	0.2804	0.2571	0.2866	0.2697	0.2479	0.2429	0.2411	0.2336	0.261	0.2468	0.2945	0.2973	0.299	0.2591	0.2797	0.2759	0.301	0.2981	0.312	0.2652	0.2629	0.2771	0.2826	0.2943	0.2882	0.2572	0.264	0.2648
	0.297	0.3147	0.3066	0.2686	0.2904	0.2727	0.3044	0.2897	0.29	0.2666	0.2685	0.277	0.254	0.2832	0.2669	0.2441	0.242	0.2371	0.2296	0.2419	0.2424	0.2905	0.2958	0.2976	0.2565	0.2762	0.2733	0.2996	0.2954	0.3096	0.2615	0.2588	0.274	0.2803	0.292	0.2856	0.2532	0.2603	0.2607
	0.2959	0.312	0.3052	0.2654	0.286	0.2686	0.3005	0.2862	0.2866	0.2636	0.2657	0.2738	0.2509	0.281	0.2639	0.2403	0.2351	0.2326	0.2251	0.2366	0.2376	0.289	0.2943	0.2956	0.2533	0.2732	0.2702	0.2976	0.2935	0.3082	0.2579	0.2561	0.2693	0.2783	0.2897	0.2836	0.2492	0.2563	0.2581
	0.2948	0.3112	0.3041	0.2653	0.2819	0.2657	0.2984	0.282	0.2826	0.2602	0.2622	0.2703	0.2476	0.2778	0.2603	0.236	0.2308	0.2287	0.2209	0.2364	0.2336	0.2874	0.2928	0.2939	0.2504	0.2708	0.2669	0.2962	0.2918	0.3062	0.254	0.2514	0.2654	0.2759	0.2878	0.2814	0.2457	0.2525	0.2533
	0.2935	0.3094	0.3031	0.2566	0.2797	0.2608	0.2943	0.2786	0.2789	0.257	0.2592	0.2668	0.2444	0.2744	0.2572	0.2322	0.2286	0.2247	0.2175	0.2283	0.2288	0.2865	0.2906	0.2925	0.2476	0.2679	0.2639	0.2938	0.2896	0.3041	0.2502	0.2474	0.2618	0.2752	0.2872	0.2794	0.2419	0.2488	0.2492
	0.2924	0.3082	0.3141	0.2526	0.277	0.2557	0.292	0.2745	0.2748	0.2538	0.2562	0.2637	0.2415	0.2711	0.2541	0.2284	0.2227	0.2209	0.2126	0.2235	0.2248	0.2845	0.2889	0.2902	0.2447	0.2652	0.2611	0.2921	0.2878	0.3024	0.247	0.2437	0.2579	0.2727	0.2839	0.2774	0.2383	0.2451	0.247
	0.2912	0.307	0.3002	0.2481	0.2737	0.2526	0.2973	0.2712	0.2716	0.2507	0.2527	0.2606	0.238	0.2677	0.2503	0.2241	0.2213	0.2166	0.2086	0.2306	0.2202	0.2826	0.287	0.2889	0.2422	0.2614	0.2579	0.2898	0.2856	0.3005	0.2428	0.24	0.2535	0.2699	0.2812	0.2751	0.2348	0.241	0.2416
	0.2901	0.3057	0.313	0.2441	0.2692	0.2473	0.2848	0.2672	0.2674	0.2478	0.2496	0.2571	0.2351	0.2647	0.2469	0.2208	0.2146	0.2124	0.2043	0.2151	0.216	0.2807	0.2854	0.2872	0.239	0.2586	0.2548	0.2885	0.2843	0.2989	0.2393	0.2359	0.2498	0.2681	0.2797	0.2727	0.2309	0.2374	0.239
	0.2889	0.3052	0.2984	0.2397	0.2642	0.2458	0.2808	0.2639	0.2641	0.2444	0.2468	0.2545	0.232	0.2613	0.244	0.2166	0.2211	0.2092	0.2004	0.2112	0.2114	0.2791	0.284	0.2854	0.2361	0.2554	0.2522	0.2867	0.2823	0.2965	0.2359	0.2321	0.246	0.2661	0.2773	0.2727	0.2274	0.2338	0.2341
	0.2881	0.3046	0.2969	0.2357	0.2612	0.2393	0.2779	0.2598	0.26	0.2415	0.2436	0.251	0.2288	0.2585	0.2404	0.2131	0.207	0.2049	0.1965	0.2067	0.2073	0.2779	0.2822	0.2842	0.2333	0.253	0.2492	0.2856	0.2804	0.2946	0.2319	0.2283	0.2421	0.2639	0.2755	0.2692	0.2241	0.2301	0.2305
	0.287	0.3027	0.2959	0.2316	0.256	0.2371	0.2771	0.2563	0.257	0.2388	0.2406	0.248	0.2258	0.2552	0.2378	0.2096	0.203	0.2006	0.1929	0.2138	0.2032	0.276	0.2806	0.2823	0.2308	0.2503	0.2466	0.2833	0.2788	0.2932	0.2295	0.2246	0.2386	0.262	0.2735	0.2671	0.2208	0.2265	0.2271
	0.2857	0.3014	0.2946	0.2291	0.2538	0.2302	0.2701	0.2525	0.2528	0.2351	0.2371	0.245	0.2224	0.2517	0.234	0.2051	0.1999	0.1967	0.1882	0.1983	0.1987	0.2741	0.2786	0.2804	0.2278	0.2468	0.2434	0.2814	0.277	0.2911	0.2247	0.2205	0.2345	0.2598	0.2714	0.2646	0.2168	0.2223	0.2234
	0.2845	0.3003	0.2989	0.2234	0.2487	0.2267	0.2693	0.249	0.2493	0.232	0.2339	0.2413	0.2196	0.2483	0.2319	0.2011	0.1945	0.1928	0.1838	0.1962	0.1941	0.2727	0.2771	0.2789	0.2246	0.2443	0.2402	0.2797	0.2749	0.289	0.221	0.2167	0.2302	0.2576	0.2694	0.2634	0.2128	0.2186	0.2195
	0.2835	0.2989	0.2923	0.2221	0.2453	0.2226	0.2625	0.2451	0.2454	0.2289	0.231	0.239	0.2162	0.2468	0.228	0.1976	0.1909	0.1893	0.1803	0.1894	0.19	0.2747	0.2756	0.277	0.2218	0.2411	0.2376	0.2779	0.2734	0.2877	0.2176	0.2138	0.2277	0.2562	0.2674	0.2607	0.2096	0.2149	0.2157
	0.2824	0.298	0.2913	0.2184	0.2396	0.2186	0.2642	0.2417	0.2418	0.2263	0.2279	0.2349	0.2132	0.244	0.2242	0.1934	0.1868	0.1852	0.1762	0.1958	0.1861	0.2692	0.2744	0.2754	0.2192	0.2381	0.2346	0.276	0.2715	0.2856	0.2139	0.2092	0.2231	0.2541	0.265	0.2587	0.2064	0.2113	0.2125
	0.2821	0.2967	0.2932	0.2111	0.2352	0.2139	0.2573	0.2378	0.2384	0.2228	0.2249	0.2323	0.2101	0.2408	0.2208	0.19	0.1831	0.1812	0.1724	0.1812	0.1815	0.2679	0.2738	0.2742	0.2181	0.2351	0.2338	0.2751	0.2699	0.2845	0.2103	0.2055	0.2196	0.2522	0.2635	0.2571	0.2026	0.2081	0.2086
	0.2803	0.2954	0.2892	0.207	0.2315	0.2094	0.2551	0.234	0.2339	0.2202	0.2219	0.2288	0.2073	0.2376	0.2175	0.186	0.18	0.1774	0.1684	0.1768	0.1772	0.2662	0.2711	0.2723	0.2139	0.2323	0.2291	0.2727	0.2678	0.2819	0.2064	0.2019	0.2155	0.2503	0.2611	0.2549	0.1991	0.2038	0.2046
	0.2793	0.2944	0.2873	0.2025	0.2262	0.2055	0.2505	0.2303	0.2305	0.2168	0.2185	0.2253	0.2039	0.2344	0.215	0.1819	0.1751	0.1731	0.1641	0.1722	0.1725	0.2645	0.2689	0.2704	0.2108	0.229	0.2258	0.271	0.2661	0.2803	0.2026	0.1981	0.2116	0.2483	0.259	0.2524	0.1953	0.2001	0.2009
	0.2781	0.2934	0.2867	0.1989	0.2223	0.2026	0.2465	0.2266	0.2268	0.2139	0.2156	0.2222	0.2007	0.2314	0.2113	0.1786	0.1807	0.1694	0.1603	0.1685	0.1688	0.2633	0.2681	0.2694	0.2081	0.2265	0.2232	0.2692	0.2647	0.2786	0.1992	0.194	0.208	0.2463	0.2577	0.2513	0.1918	0.1966	0.1971
	0.2772	0.2933	0.287	0.1947	0.2176	0.1993	0.2422	0.2227	0.2232	0.2108	0.2131	0.2192	0.1978	0.228	0.2084	0.1745	0.1674	0.1658	0.1575	0.1646	0.1644	0.2616	0.2661	0.2675	0.2054	0.2235	0.2204	0.2677	0.2629	0.2766	0.1957	0.1905	0.2042	0.2445	0.2553	0.2492	0.1885	0.193	0.1937
	0.276	0.291	0.2843	0.1908	0.2155	0.1931	0.2435	0.2195	0.2196	0.2078	0.2098	0.2157	0.1947	0.2247	0.2057	0.1709	0.1635	0.1616	0.1526	0.1788	0.1605	0.26	0.2652	0.2658	0.2027	0.2206	0.2175	0.2657	0.264	0.2764	0.1921	0.1867	0.2014	0.2423	0.2537	0.2468	0.185	0.1891	0.1899
	0.2752	0.2896	0.2829	0.1863	0.2078	0.1938	0.2362	0.2156	0.2158	0.2044	0.2061	0.2126	0.1915	0.2196	0.2016	0.1672	0.1594	0.1576	0.149	0.1581	0.1566	0.2583	0.2624	0.264	0.1999	0.2176	0.2144	0.2639	0.2588	0.2725	0.1884	0.1828	0.1964	0.2401	0.2514	0.2449	0.181	0.1855	0.1864
	0.2739	0.2889	0.293	0.1822	0.2048	0.1852	0.2325	0.212	0.2124	0.2017	0.2037	0.2098	0.1887	0.2169	0.1985	0.1633	0.1638	0.1542	0.1454	0.1617	0.1537	0.2573	0.2632	0.2627	0.197	0.2153	0.2119	0.2626	0.2569	0.2711	0.1847	0.1793	0.1929	0.2384	0.2515	0.2431	0.1779	0.1823	0.183
	0.2728	0.2881	0.2813	0.1787	0.2005	0.1799	0.2288	0.2085	0.2091	0.1991	0.2005	0.2065	0.186	0.2136	0.1963	0.1594	0.1522	0.1505	0.1432	0.1524	0.1524	0.2551	0.2595	0.2616	0.1942	0.2124	0.2088	0.2608	0.2556	0.2723	0.1818	0.1758	0.1892	0.2362	0.2473	0.2411	0.1742	0.1782	0.1792
	0.2716	0.2864	0.2796	0.1742	0.1968	0.1764	0.227	0.2048	0.2052	0.1954	0.1975	0.2037	0.1824	0.2104	0.1924	0.1558	0.1625	0.1467	0.1425	0.1511	0.1516	0.2538	0.2582	0.2592	0.1914	0.2096	0.2058	0.259	0.2539	0.2675	0.178	0.1717	0.1854	0.2345	0.2457	0.2392	0.1708	0.1758	0.1755
	0.2706	0.2851	0.2788	0.1701	0.193	0.1725	0.2235	0.2012	0.2015	0.1924	0.1946	0.201	0.1793	0.2071	0.1891	0.1531	0.1573	0.1443	0.1433	0.1513	0.1514	0.2516	0.2568	0.2575	0.1888	0.2066	0.2031	0.2573	0.2521	0.2656	0.1746	0.1682	0.1817	0.2324	0.2434	0.2369	0.1671	0.171	0.172
	0.2695	0.2857	0.2774	0.1661	0.1884	0.1678	0.219	0.1975	0.1975	0.1896	0.1915	0.1971	0.1763	0.2041	0.1858	0.1515	0.1546	0.1428	0.1438	0.154	0.1515	0.2518	0.2547	0.2562	0.186	0.2041	0.2002	0.2555	0.2505	0.2664	0.1712	0.1648	0.178	0.2306	0.2414	0.2353	0.1641	0.1677	0.1702
	0.2687	0.2832	0.2835	0.1623	0.1847	0.1636	0.2153	0.1937	0.1942	0.1866	0.1886	0.194	0.1736	0.2007	0.1823	0.1511	0.151	0.1422	0.1421	0.1547	0.1514	0.2487	0.2531	0.2545	0.1834	0.2008	0.1973	0.2538	0.2487	0.2621	0.1672	0.1622	0.1745	0.2286	0.2407	0.2331	0.1602	0.164	0.1647
	0.2673	0.2817	0.2755	0.1584	0.18	0.1601	0.2119	0.1898	0.1902	0.1835	0.1853	0.1907	0.1705	0.1976	0.1796	0.1509	0.143	0.1418	0.1432	0.1505	0.1515	0.2481	0.2523	0.253	0.1805	0.1985	0.1944	0.2527	0.2467	0.2602	0.1644	0.1578	0.1714	0.2264	0.2376	0.2309	0.1572	0.1606	0.1612
	0.2665	0.2807	0.2745	0.1542	0.1772	0.1558	0.2081	0.1864	0.1866	0.1804	0.1827	0.1874	0.1673	0.1947	0.1758	0.1509	0.1448	0.1418	0.142	0.1504	0.1512	0.2455	0.2498	0.2512	0.1777	0.1951	0.1913	0.2505	0.245	0.2592	0.1612	0.155	0.1686	0.2249	0.2355	0.2289	0.1536	0.1571	0.1583
	0.2652	0.2795	0.2732	0.1507	0.1719	0.1525	0.2043	0.1832	0.1837	0.178	0.1793	0.1847	0.1641	0.1912	0.1729	0.1509	0.1496	0.1421	0.1421	0.1503	0.1514	0.2438	0.2511	0.2497	0.1749	0.1925	0.1888	0.2488	0.2434	0.2569	0.1593	0.1537	0.1675	0.2225	0.2336	0.2284	0.1514	0.1551	0.1561
	0.2643	0.2786	0.2721	0.1474	0.1688	0.1494	0.202	0.1793	0.1796	0.175	0.1765	0.181	0.1611	0.1883	0.1699	0.1508	0.1548	0.1423	0.1423	0.1515	0.1515	0.2429	0.247	0.2481	0.1725	0.1895	0.1861	0.2471	0.2417	0.2553	0.1583	0.1533	0.1672	0.221	0.2315	0.2252	0.15	0.1539	0.1553
	0.2628	0.2774	0.2708	0.1445	0.1656	0.1455	0.198	0.1758	0.1758	0.1716	0.1732	0.1781	0.1579	0.1844	0.1665	0.1506	0.1425	0.142	0.1431	0.1506	0.1514	0.2405	0.2452	0.2464	0.1695	0.1868	0.1831	0.245	0.24	0.2532	0.158	0.1529	0.167	0.2186	0.2292	0.2227	0.1492	0.1537	0.1545
	0.2619	0.2774	0.2778	0.1433	0.1634	0.1443	0.1956	0.1718	0.1726	0.1685	0.1703	0.1756	0.155	0.1811	0.1636	0.1507	0.1427	0.1419	0.1421	0.1503	0.1513	0.2394	0.2455	0.2448	0.1667	0.1837	0.1802	0.2436	0.2379	0.2514	0.1579	0.1529	0.167	0.2168	0.2274	0.2209	0.1489	0.1532	0.1549
	0.2611	0.2758	0.2772	0.1444	0.1637	0.1431	0.1943	0.1683	0.1685	0.1657	0.1676	0.172	0.1523	0.178	0.1609	0.1508	0.1426	0.142	0.1421	0.154	0.1516	0.2375	0.2421	0.2431	0.164	0.1807	0.1773	0.2416	0.2361	0.2494	0.158	0.157	0.1669	0.2148	0.2251	0.2188	0.1492	0.153	0.1556
	0.2597	0.2738	0.2808	0.1428	0.1624	0.1433	0.1897	0.1647	0.1649	0.1636	0.1642	0.1693	0.1491	0.1754	0.1575	0.1505	0.1513	0.1418	0.1431	0.1505	0.1509	0.236	0.2401	0.2412	0.1612	0.1778	0.1743	0.2403	0.235	0.2478	0.1581	0.1539	0.1669	0.2125	0.2232	0.2172	0.1489	0.1529	0.1543
	0.2587	0.2727	0.2762	0.1428	0.1625	0.1434	0.1849	0.1609	0.1613	0.1596	0.1613	0.1657	0.1465	0.1721	0.1543	0.1507	0.1427	0.142	0.142	0.1502	0.1512	0.2343	0.2384	0.2397	0.1585	0.1752	0.1716	0.2383	0.2326	0.2457	0.1576	0.1525	0.1666	0.211	0.2215	0.2152	0.1491	0.1531	0.1546
	0.258	0.2718	0.272	0.143	0.1632	0.1434	0.1827	0.1578	0.1577	0.1573	0.1585	0.1634	0.1441	0.1694	0.1529	0.1506	0.1528	0.1426	0.1433	0.1507	0.1513	0.2331	0.2383	0.239	0.1559	0.1762	0.1689	0.237	0.2309	0.2443	0.1578	0.1531	0.1668	0.209	0.2191	0.2139	0.1488	0.1533	0.1551
	0.2567	0.2707	0.2646	0.1424	0.1625	0.1491	0.178	0.1538	0.1541	0.1542	0.1557	0.1599	0.1419	0.1671	0.1496	0.1509	0.1481	0.1413	0.1436	0.1601	0.1512	0.2311	0.2352	0.2369	0.1533	0.1693	0.1664	0.2354	0.2292	0.2424	0.158	0.1528	0.167	0.2069	0.2174	0.2112	0.1487	0.1531	0.1547
	0.2557	0.2707	0.264	0.1426	0.1623	0.151	0.1752	0.1507	0.1511	0.1517	0.1532	0.1577	0.1402	0.1661	0.1487	0.1505	0.1498	0.1418	0.142	0.1504	0.151	0.2297	0.234	0.2357	0.1505	0.1673	0.1638	0.2335	0.2277	0.2443	0.1577	0.1525	0.1666	0.2053	0.2159	0.2092	0.1487	0.1534	0.1545
	0.2547	0.2684	0.262	0.1428	0.1625	0.1431	0.1728	0.1473	0.1484	0.1488	0.1511	0.1553	0.1395	0.1653	0.1474	0.1505	0.1446	0.1415	0.143	0.1586	0.151	0.2279	0.2331	0.2338	0.148	0.1639	0.1607	0.2317	0.2258	0.239	0.1577	0.1527	0.1667	0.2037	0.2136	0.208	0.1486	0.1532	0.1545
	0.2533	0.2672	0.269	0.1423	0.1623	0.1428	0.1697	0.1447	0.1454	0.1474	0.15	0.1543	0.1391	0.1649	0.1474	0.1506	0.1505	0.1414	0.1421	0.1507	0.1511	0.2263	0.2305	0.2324	0.1454	0.1617	0.1582	0.2303	0.2242	0.2371	0.1577	0.1525	0.1665	0.2014	0.2118	0.2057	0.1487	0.1528	0.1545
	0.2525	0.2663	0.2595	0.1427	0.1623	0.1434	0.1662	0.1422	0.1437	0.1465	0.1497	0.1534	0.139	0.165	0.1472	0.1507	0.1553	0.1417	0.142	0.1504	0.1511	0.2249	0.2294	0.2303	0.1428	0.1593	0.1558	0.2289	0.2223	0.2355	0.1577	0.1527	0.1666	0.1994	0.2096	0.2034	0.1489	0.1532	0.1547
	0.2513	0.2652	0.2595	0.1426	0.1627	0.1427	0.1664	0.1413	0.1433	0.1468	0.1501	0.1538	0.1396	0.1656	0.1479	0.1509	0.156	0.1422	0.1435	0.1503	0.152	0.2234	0.2284	0.2291	0.1406	0.1609	0.1544	0.2274	0.2213	0.234	0.1581	0.1533	0.1672	0.1977	0.208	0.2014	0.1491	0.1537	0.1549
	0.2503	0.2638	0.269	0.1427	0.1626	0.1426	0.1653	0.1408	0.1426	0.1459	0.1492	0.153	0.1389	0.1647	0.1472	0.1505	0.1464	0.1418	0.1427	0.1632	0.1511	0.2215	0.2261	0.2271	0.1385	0.1552	0.1522	0.2249	0.2186	0.2318	0.1577	0.1527	0.1663	0.1953	0.2054	0.1991	0.1487	0.1528	0.1543
	0.2495	0.2627	0.2566	0.1424	0.1621	0.1421	0.1653	0.1404	0.1425	0.1461	0.1493	0.153	0.1386	0.1648	0.1468	0.1505	0.1542	0.1414	0.1421	0.1532	0.1513	0.2205	0.2247	0.2257	0.1373	0.1545	0.1518	0.2236	0.2175	0.2301	0.1576	0.1526	0.1668	0.1933	0.2038	0.1975	0.1484	0.1529	0.1543
	0.2481	0.2624	0.2648	0.1424	0.1628	0.1431	0.1648	0.1405	0.1424	0.1459	0.1491	0.1528	0.1385	0.1647	0.147	0.1503	0.1527	0.1411	0.1419	0.1505	0.1512	0.2183	0.2227	0.2238	0.1366	0.1545	0.1514	0.2216	0.2153	0.2281	0.1575	0.1532	0.1664	0.1918	0.202	0.1958	0.1487	0.153	0.1542
	0.247	0.2607	0.2544	0.142	0.1623	0.1424	0.1651	0.1403	0.1424	0.146	0.1492	0.1528	0.1386	0.1646	0.1468	0.1502	0.1451	0.1412	0.1423	0.1502	0.1514	0.217	0.2213	0.2224	0.1364	0.1536	0.1513	0.22	0.2136	0.2264	0.1575	0.1524	0.1664	0.1897	0.1999	0.1935	0.1486	0.1532	0.1543
	0.2463	0.2604	0.263	0.1426	0.1627	0.1439	0.1663	0.1403	0.1424	0.146	0.1492	0.1535	0.1387	0.1648	0.1468	0.1503	0.1507	0.141	0.1418	0.1517	0.1512	0.2178	0.2195	0.2208	0.1367	0.1541	0.1512	0.2186	0.2121	0.2245	0.1576	0.1525	0.1668	0.188	0.198	0.1915	0.1487	0.1529	0.1546
	0.2447	0.2584	0.252	0.141	0.1624	0.1429	0.1646	0.1402	0.1424	0.1458	0.149	0.1527	0.1385	0.1647	0.1471	0.1504	0.1476	0.1414	0.1417	0.15	0.151	0.2143	0.2183	0.219	0.1363	0.1577	0.151	0.2168	0.2102	0.2232	0.1575	0.1528	0.1663	0.1859	0.1961	0.1894	0.1489	0.1529	0.1541
	0.2432	0.2568	0.2505	0.1414	0.162	0.1424	0.1643	0.1402	0.1422	0.1452	0.1486	0.153	0.1383	0.1641	0.1462	0.1503	0.1533	0.1409	0.1416	0.1679	0.1505	0.2123	0.2165	0.2178	0.1358	0.1527	0.1503	0.2142	0.2078	0.2207	0.1568	0.1518	0.1661	0.184	0.1941	0.1873	0.1484	0.1523	0.1537
	0.2429	0.2567	0.2497	0.1429	0.1621	0.1424	0.1647	0.1404	0.1425	0.1458	0.1488	0.1529	0.139	0.1611	0.1482	0.1506	0.1521	0.1413	0.1421	0.1505	0.1511	0.2109	0.2157	0.2161	0.1363	0.1534	0.1514	0.2133	0.2067	0.2235	0.1575	0.1537	0.1667	0.1824	0.1921	0.186	0.1485	0.153	0.1542
	0.2414	0.255	0.2486	0.1422	0.162	0.1468	0.1665	0.14	0.1423	0.1458	0.1493	0.1528	0.1384	0.1611	0.1478	0.1501	0.154	0.1411	0.142	0.1504	0.151	0.2089	0.2134	0.2144	0.1363	0.1536	0.1511	0.212	0.2049	0.2196	0.1576	0.1526	0.1666	0.1804	0.1901	0.1842	0.1485	0.1529	0.1541
	0.2406	0.2539	0.2471	0.1421	0.1622	0.1425	0.1648	0.14	0.1423	0.1458	0.1491	0.153	0.1388	0.1599	0.1468	0.1505	0.1446	0.1416	0.143	0.1527	0.151	0.208	0.2118	0.213	0.1362	0.1536	0.151	0.2102	0.2036	0.216	0.1575	0.1523	0.1665	0.1785	0.1882	0.182	0.1484	0.1527	0.1542
	0.2401	0.2533	0.2537	0.1431	0.1625	0.1425	0.1654	0.1406	0.1429	0.146	0.1494	0.1529	0.139	0.1601	0.1471	0.1507	0.1526	0.1417	0.1436	0.1509	0.1513	0.206	0.2107	0.2119	0.1364	0.1541	0.1512	0.2088	0.202	0.2176	0.1577	0.1526	0.1667	0.1774	0.1869	0.1803	0.1487	0.1535	0.1547
	0.2388	0.2518	0.2584	0.1414	0.1623	0.1425	0.166	0.1402	0.1422	0.1462	0.1489	0.1528	0.1385	0.154	0.148	0.1505	0.1537	0.1416	0.1426	0.1508	0.1512	0.2043	0.2088	0.21	0.1364	0.1532	0.151	0.2069	0.1999	0.2136	0.1576	0.1525	0.1666	0.1749	0.1846	0.1785	0.1486	0.1528	0.1542
	0.2379	0.2505	0.2551	0.1414	0.1624	0.1427	0.165	0.1402	0.1424	0.1456	0.1489	0.1532	0.1386	0.1528	0.1476	0.1505	0.1458	0.1418	0.1434	0.1588	0.1513	0.2033	0.2073	0.2081	0.1363	0.154	0.1511	0.2052	0.198	0.2105	0.1577	0.1527	0.1668	0.1727	0.1825	0.1769	0.1494	0.1531	0.1542
	0.2362	0.2496	0.243	0.1419	0.1622	0.1439	0.1646	0.1401	0.142	0.1457	0.1489	0.1527	0.1385	0.1527	0.1471	0.1502	0.1423	0.1418	0.1423	0.1522	0.151	0.2015	0.2055	0.2066	0.1361	0.1538	0.1508	0.2034	0.1964	0.2087	0.1576	0.1526	0.1663	0.1708	0.1805	0.1741	0.1488	0.1527	0.1548
	0.2354	0.2496	0.242	0.1421	0.1618	0.1425	0.1636	0.14	0.1422	0.1458	0.149	0.153	0.1388	0.1526	0.147	0.1507	0.1557	0.142	0.1422	0.1505	0.1514	0.2002	0.2039	0.2053	0.1362	0.1532	0.1511	0.2019	0.1948	0.2072	0.1577	0.1531	0.1666	0.1692	0.1787	0.1725	0.1489	0.1531	0.1549
	0.2345	0.2483	0.2516	0.1411	0.1623	0.1424	0.1642	0.1401	0.1422	0.1456	0.149	0.1528	0.1387	0.1527	0.1467	0.1505	0.1537	0.1418	0.1427	0.1518	0.151	0.2014	0.2025	0.2034	0.1362	0.153	0.1509	0.2002	0.1929	0.2057	0.1574	0.1524	0.1666	0.1676	0.1769	0.1712	0.1507	0.1528	0.1544
	0.2333	0.2462	0.2525	0.141	0.1619	0.1426	0.1643	0.1399	0.142	0.1459	0.1488	0.1526	0.1383	0.1523	0.1495	0.1502	0.1421	0.1413	0.1425	0.1502	0.151	0.1967	0.2005	0.2018	0.1357	0.153	0.1507	0.1983	0.1911	0.2035	0.1576	0.1523	0.1664	0.1651	0.1749	0.1682	0.148	0.1527	0.1544
	0.232	0.2453	0.2524	0.1413	0.1621	0.1432	0.1642	0.1404	0.1424	0.1457	0.149	0.1526	0.1385	0.1526	0.1469	0.1507	0.1426	0.142	0.1432	0.151	0.1512	0.1957	0.1993	0.2005	0.1362	0.1567	0.1512	0.197	0.1897	0.2019	0.1574	0.1524	0.1664	0.1633	0.1727	0.1669	0.1484	0.153	0.1543
	0.2312	0.2441	0.2377	0.1423	0.1623	0.1437	0.1666	0.1402	0.142	0.1456	0.1491	0.1526	0.1385	0.1525	0.1474	0.1503	0.1457	0.1418	0.1419	0.1505	0.1515	0.1936	0.1977	0.1988	0.138	0.1534	0.1509	0.1953	0.188	0.2001	0.1574	0.1524	0.1667	0.1613	0.1709	0.1648	0.1486	0.1527	0.154
	0.2301	0.2437	0.2367	0.1424	0.1621	0.1427	0.1654	0.1398	0.1422	0.1457	0.1487	0.1523	0.1387	0.1522	0.1464	0.1504	0.1454	0.1418	0.1421	0.1506	0.151	0.192	0.1962	0.1973	0.1361	0.1535	0.1512	0.1937	0.1861	0.1984	0.1573	0.1557	0.1664	0.1597	0.1688	0.1628	0.1481	0.153	0.1542
	0.2297	0.2418	0.2475	0.1411	0.1619	0.1436	0.1642	0.14	0.1421	0.1457	0.1487	0.1529	0.1384	0.1522	0.1468	0.1504	0.1492	0.1416	0.1428	0.1637	0.1508	0.1905	0.1945	0.1957	0.1359	0.1533	0.1508	0.1917	0.1867	0.1967	0.1573	0.1522	0.1661	0.1578	0.1671	0.1608	0.1482	0.1526	0.1542
	0.2281	0.2408	0.2471	0.1411	0.162	0.1431	0.164	0.1398	0.142	0.1459	0.149	0.1525	0.1392	0.1525	0.1469	0.1506	0.1527	0.1417	0.1421	0.1503	0.1507	0.1889	0.1932	0.194	0.1362	0.1539	0.1508	0.1908	0.1829	0.1965	0.1577	0.1524	0.1665	0.1557	0.1652	0.1596	0.1486	0.1528	0.154
	0.2273	0.2399	0.235	0.1407	0.1623	0.1423	0.1642	0.1404	0.1426	0.1463	0.1491	0.1527	0.1389	0.1525	0.1467	0.1504	0.1529	0.1417	0.1425	0.1692	0.1511	0.1875	0.1916	0.1928	0.1363	0.1536	0.1508	0.1888	0.1816	0.1932	0.1575	0.1528	0.1666	0.154	0.1635	0.1573	0.1487	0.153	0.154
	0.226	0.2398	0.2423	0.1423	0.1626	0.1426	0.1635	0.14	0.1422	0.1456	0.1488	0.1521	0.1385	0.1524	0.1469	0.15	0.1539	0.1416	0.1427	0.1501	0.1509	0.1858	0.1912	0.1912	0.1359	0.1531	0.1508	0.1869	0.1793	0.1917	0.1573	0.1526	0.1663	0.1521	0.1614	0.1558	0.1485	0.1528	0.1546
	0.2248	0.2375	0.2308	0.1419	0.1621	0.1431	0.1656	0.1399	0.142	0.1453	0.1485	0.153	0.1382	0.1518	0.1468	0.1502	0.1445	0.1421	0.1418	0.15	0.1509	0.1843	0.1883	0.1892	0.1359	0.153	0.1507	0.1851	0.1777	0.1894	0.1572	0.1521	0.1663	0.1506	0.16	0.153	0.1478	0.1527	0.1537
	0.2242	0.2367	0.23	0.1421	0.1619	0.1428	0.168	0.1398	0.142	0.1458	0.1488	0.1529	0.1384	0.152	0.147	0.1504	0.1513	0.1418	0.1424	0.1503	0.1511	0.1828	0.1865	0.188	0.136	0.1532	0.1509	0.184	0.1761	0.188	0.1574	0.1522	0.1669	0.1486	0.1579	0.1518	0.1489	0.1529	0.1541
	0.2228	0.2353	0.2404	0.1412	0.1619	0.1421	0.1638	0.1399	0.1421	0.1463	0.1487	0.1527	0.1385	0.1515	0.1469	0.1505	0.1541	0.1417	0.1424	0.1696	0.151	0.1812	0.1853	0.1863	0.136	0.1531	0.1508	0.1819	0.1743	0.1864	0.1573	0.1531	0.1664	0.1472	0.1563	0.1496	0.1481	0.1529	0.1541
	0.2217	0.234	0.2394	0.1416	0.1623	0.1431	0.1648	0.1399	0.142	0.1454	0.149	0.1525	0.1384	0.1516	0.1467	0.1505	0.1535	0.1413	0.1425	0.15	0.1507	0.1797	0.1836	0.1847	0.136	0.1527	0.1505	0.1808	0.1726	0.1844	0.1572	0.1521	0.1661	0.1455	0.1542	0.1481	0.1478	0.1526	0.1539
	0.221	0.233	0.2268	0.1408	0.162	0.1427	0.1638	0.1401	0.1421	0.1457	0.1489	0.1528	0.1387	0.1517	0.1469	0.1503	0.1526	0.142	0.1431	0.1651	0.1511	0.1784	0.1823	0.1835	0.1359	0.1532	0.1509	0.1789	0.1709	0.1831	0.1576	0.1528	0.1667	0.1446	0.1526	0.147	0.1481	0.1527	0.154
	0.2199	0.232	0.2366	0.1429	0.162	0.1431	0.1649	0.1397	0.1421	0.1457	0.1489	0.1525	0.1385	0.1513	0.147	0.1503	0.1461	0.1419	0.1428	0.15	0.1512	0.1776	0.1808	0.1819	0.136	0.1575	0.1508	0.1769	0.1691	0.1812	0.1573	0.1525	0.1665	0.1435	0.151	0.145	0.1481	0.1527	0.154
	0.2186	0.2307	0.226	0.141	0.1627	0.1426	0.1638	0.1401	0.1423	0.1457	0.1489	0.1526	0.1386	0.1516	0.1469	0.1504	0.151	0.1414	0.142	0.15	0.1509	0.1753	0.1792	0.1803	0.1358	0.1533	0.1507	0.1753	0.1675	0.18	0.1573	0.1526	0.1663	0.1431	0.1496	0.1437	0.1486	0.1528	0.1593
	0.2176	0.2304	0.2232	0.141	0.1625	0.1419	0.1643	0.14	0.1422	0.1456	0.1487	0.1525	0.1387	0.1516	0.1468	0.1503	0.1464	0.1416	0.1419	0.1531	0.1508	0.1739	0.1782	0.1787	0.1358	0.1532	0.1506	0.1738	0.1658	0.1782	0.1574	0.1527	0.1662	0.1427	0.1486	0.1431	0.1481	0.1527	0.154
	0.2167	0.2298	0.2254	0.1423	0.1619	0.1417	0.1645	0.1396	0.1419	0.1457	0.149	0.1532	0.1385	0.1518	0.1473	0.1505	0.1457	0.1416	0.1426	0.1504	0.1513	0.1725	0.1759	0.1779	0.1362	0.1534	0.1509	0.1729	0.1644	0.1763	0.1577	0.1526	0.1662	0.1427	0.1482	0.1427	0.1481	0.1532	0.1542
	0.2158	0.228	0.225	0.1411	0.1628	0.1447	0.1647	0.1401	0.1423	0.1455	0.1488	0.1525	0.1386	0.1514	0.1467	0.15	0.1499	0.1416	0.142	0.1503	0.151	0.1706	0.1742	0.1755	0.1359	0.153	0.1507	0.1705	0.1626	0.1754	0.1574	0.1533	0.1664	0.1426	0.1478	0.1423	0.1485	0.1527	0.1595
	0.2147	0.2267	0.2266	0.1409	0.163	0.143	0.1642	0.1401	0.1422	0.1452	0.1488	0.1525	0.1384	0.1514	0.1467	0.1502	0.1423	0.1415	0.1415	0.1502	0.1511	0.1694	0.1729	0.1739	0.1359	0.1536	0.1508	0.169	0.1608	0.1726	0.1574	0.1521	0.1663	0.1424	0.148	0.142	0.1482	0.1527	0.1541
	0.2136	0.2257	0.2192	0.1409	0.1618	0.1421	0.1645	0.1398	0.1419	0.1458	0.1489	0.1533	0.1384	0.1516	0.1477	0.1505	0.1464	0.1418	0.1434	0.1504	0.1511	0.1678	0.1716	0.1724	0.1359	0.153	0.151	0.168	0.1593	0.171	0.1574	0.1522	0.1663	0.1425	0.1474	0.1426	0.1481	0.1527	0.1541
	0.2124	0.2245	0.2291	0.1414	0.162	0.1426	0.1697	0.1401	0.1422	0.1455	0.1487	0.1527	0.1383	0.1521	0.1464	0.1502	0.1477	0.1417	0.142	0.1532	0.1507	0.1664	0.1699	0.1709	0.1359	0.1531	0.1506	0.1655	0.1575	0.1696	0.1574	0.1524	0.1664	0.1422	0.1473	0.142	0.1483	0.1529	0.1542
	0.2112	0.2234	0.2175	0.1407	0.1615	0.1457	0.164	0.1395	0.1421	0.1457	0.1488	0.1523	0.1385	0.1516	0.1465	0.1505	0.1422	0.1411	0.1426	0.1546	0.1508	0.1642	0.1679	0.1694	0.1361	0.1579	0.1508	0.164	0.1559	0.1683	0.1572	0.1522	0.1663	0.1423	0.1475	0.1416	0.1485	0.1528	0.1553
	0.2102	0.2222	0.2195	0.1406	0.1619	0.1426	0.1628	0.1398	0.1421	0.1456	0.1485	0.1523	0.1383	0.1515	0.1467	0.1501	0.1471	0.1411	0.1424	0.1498	0.1512	0.1629	0.1672	0.1678	0.1358	0.153	0.1507	0.1626	0.1543	0.1669	0.1573	0.1527	0.1664	0.1423	0.1492	0.1417	0.1479	0.1525	0.1538
	0.2092	0.2211	0.2272	0.1439	0.1618	0.1423	0.1632	0.1396	0.1416	0.1457	0.1487	0.1528	0.1389	0.1516	0.1468	0.1503	0.1458	0.1413	0.1429	0.1664	0.1512	0.1615	0.1653	0.1664	0.1361	0.1538	0.1511	0.1613	0.1529	0.1647	0.1577	0.1526	0.1665	0.1424	0.148	0.1418	0.148	0.1531	0.1565
	0.2086	0.2204	0.2136	0.141	0.162	0.1433	0.1638	0.1402	0.1422	0.1457	0.1489	0.1525	0.1384	0.1515	0.1471	0.1504	0.1533	0.1411	0.1425	0.1506	0.1508	0.1616	0.1639	0.1648	0.1359	0.1528	0.1507	0.1595	0.1514	0.1631	0.1574	0.1527	0.1662	0.1426	0.1476	0.1418	0.1483	0.1524	0.1539
	0.2074	0.2195	0.2136	0.1409	0.1618	0.1423	0.163	0.14	0.142	0.1457	0.1488	0.1524	0.1386	0.1516	0.1476	0.1502	0.1533	0.1411	0.1424	0.1503	0.151	0.1589	0.1623	0.1632	0.1358	0.1525	0.1507	0.158	0.15	0.1659	0.1573	0.1522	0.1663	0.1421	0.1471	0.1414	0.1479	0.153	0.1541
	0.2063	0.2185	0.2144	0.1405	0.1619	0.1417	0.167	0.14	0.1419	0.1456	0.1487	0.1522	0.1383	0.1515	0.1466	0.1507	0.1509	0.1414	0.1418	0.1497	0.1513	0.1571	0.1606	0.1616	0.1358	0.153	0.1508	0.1566	0.1485	0.1607	0.1572	0.1528	0.1661	0.1421	0.1472	0.1414	0.1481	0.1527	0.1541
	0.2051	0.2172	0.2196	0.1457	0.1617	0.142	0.1627	0.1396	0.1418	0.1456	0.1486	0.1528	0.1382	0.1516	0.1468	0.1502	0.1457	0.1411	0.1419	0.1498	0.1509	0.156	0.1594	0.1604	0.1359	0.1533	0.1508	0.1556	0.1491	0.1601	0.1573	0.1529	0.1663	0.1423	0.1472	0.1418	0.1481	0.1529	0.1542
	0.2039	0.2155	0.2213	0.1408	0.1617	0.1421	0.1719	0.1398	0.1425	0.1455	0.1487	0.1524	0.1385	0.1514	0.1464	0.1504	0.1423	0.1413	0.1419	0.1499	0.1508	0.1545	0.1577	0.1589	0.1358	0.1562	0.1504	0.1542	0.1468	0.159	0.1574	0.1523	0.1661	0.1431	0.1471	0.1424	0.148	0.1525	0.154
	0.2031	0.2152	0.2081	0.1458	0.162	0.1431	0.1645	0.1398	0.1419	0.1455	0.149	0.1527	0.1384	0.1516	0.1478	0.1502	0.1537	0.1411	0.1421	0.1654	0.1506	0.1526	0.1566	0.1572	0.136	0.1529	0.1504	0.1538	0.1465	0.1588	0.1573	0.1523	0.1662	0.1422	0.1472	0.1415	0.1481	0.1526	0.1541
	0.2019	0.2136	0.2069	0.1412	0.1621	0.1421	0.1633	0.1398	0.1419	0.1452	0.1486	0.1526	0.1385	0.1514	0.1466	0.1501	0.1434	0.1412	0.1423	0.1499	0.1508	0.1513	0.1551	0.156	0.1359	0.1533	0.1503	0.1529	0.1457	0.1587	0.157	0.1536	0.1663	0.1422	0.1469	0.1414	0.1481	0.1526	0.1538
	0.2011	0.2124	0.2172	0.1419	0.1616	0.1423	0.1642	0.1399	0.1418	0.1456	0.1489	0.1528	0.1384	0.1516	0.147	0.1502	0.1466	0.1412	0.1422	0.164	0.1508	0.15	0.1534	0.1546	0.1359	0.1527	0.1505	0.1528	0.1458	0.1593	0.1573	0.1524	0.1664	0.1421	0.1469	0.1414	0.148	0.1526	0.1541
	0.1999	0.2111	0.2137	0.1408	0.1618	0.1425	0.1626	0.1397	0.1416	0.1455	0.1487	0.1521	0.1387	0.1516	0.1465	0.1502	0.1526	0.1412	0.1422	0.15	0.1509	0.1487	0.1522	0.153	0.1359	0.1529	0.1505	0.1528	0.1455	0.1585	0.1574	0.1524	0.1662	0.1422	0.1469	0.1423	0.1486	0.1525	0.1541
	0.1991	0.2104	0.2085	0.1409	0.1625	0.1421	0.1637	0.1399	0.142	0.1453	0.1486	0.152	0.1382	0.1516	0.1464	0.1501	0.1421	0.1409	0.1428	0.1606	0.1507	0.1474	0.152	0.1515	0.1358	0.1533	0.1505	0.1525	0.1454	0.1601	0.1575	0.1525	0.1661	0.1425	0.1473	0.1422	0.1521	0.1526	0.1541
	0.1979	0.2093	0.2151	0.1411	0.1638	0.1425	0.1636	0.1397	0.1418	0.146	0.1487	0.1527	0.1386	0.1515	0.1468	0.1504	0.1494	0.1417	0.1416	0.1507	0.1509	0.1472	0.1495	0.1505	0.1359	0.153	0.1506	0.1524	0.1455	0.1589	0.1576	0.1524	0.1664	0.1425	0.1471	0.1416	0.148	0.1527	0.1539
	0.1969	0.2082	0.2134	0.1423	0.1623	0.1424	0.1639	0.1397	0.142	0.1454	0.1488	0.1528	0.1386	0.1516	0.1465	0.1501	0.1538	0.1414	0.1418	0.15	0.1511	0.1453	0.1484	0.1496	0.136	0.153	0.1509	0.1525	0.1455	0.1589	0.1573	0.1545	0.1664	0.1422	0.1472	0.1418	0.1555	0.1529	0.1538
	0.196	0.2073	0.2007	0.142	0.1619	0.1423	0.1632	0.1399	0.1418	0.1453	0.1486	0.1523	0.1383	0.1516	0.1467	0.1503	0.1465	0.1415	0.1424	0.15	0.1507	0.145	0.1475	0.1485	0.1358	0.1532	0.1506	0.1521	0.1452	0.1582	0.1575	0.1526	0.1662	0.1422	0.1472	0.1416	0.1479	0.1525	0.154
	0.195	0.2061	0.1995	0.141	0.162	0.1419	0.1668	0.1398	0.1421	0.1454	0.1487	0.1523	0.139	0.1518	0.1469	0.1506	0.1427	0.1411	0.143	0.15	0.151	0.1446	0.1468	0.1478	0.1359	0.1532	0.1508	0.1523	0.1453	0.1587	0.1573	0.1535	0.1662	0.1422	0.1471	0.1417	0.1482	0.153	0.154
	0.1937	0.2051	0.2008	0.1408	0.1616	0.1423	0.1642	0.1401	0.142	0.1456	0.1487	0.1526	0.1383	0.1514	0.1466	0.1499	0.1505	0.1416	0.1416	0.1529	0.1508	0.1445	0.1465	0.1471	0.1358	0.1528	0.1507	0.1525	0.1452	0.1584	0.1572	0.1521	0.1662	0.1422	0.1469	0.1418	0.1539	0.1531	0.1537
	0.193	0.204	0.2058	0.1432	0.1621	0.1425	0.1642	0.14	0.1417	0.1456	0.1486	0.1524	0.1386	0.1513	0.1465	0.1499	0.1487	0.1415	0.143	0.1703	0.151	0.1445	0.1464	0.1468	0.1359	0.1532	0.1507	0.1522	0.1511	0.1614	0.1573	0.1523	0.1663	0.143	0.1472	0.1417	0.1481	0.1529	0.154

## Sheet: Data for Fig 5F
	No PfkA			dsixA-1			dsixA-1 + SixA			dsixA-2			dsixA-2 + SixA			dptsHI dsixA-1			dptsHI dsixA-1 + SixA			dptsHI dsixA-2			dptsHI dsixA-2 + SixA			dsixA-1			dsixA + SixA			dptsHI dsixA			dptsHI dsixA + SixA			No PfkA
	0.4436	0.4719	0.4693	0.4488	0.4821	0.4699	0.4898	0.4597	0.4639	0.4544	0.4612	0.4638	0.4674	0.4754	0.4735	0.4364	0.4535	0.4568	0.4416	0.477	0.4725	0.4391	0.4661	0.4577	0.4576	0.4779	0.4721	0.3537	0.3815	0.3734	0.3577	0.3595	0.3765	0.3532	0.3779	0.3632	0.3714	0.3532	0.3637	0.3554	0.3678	0.374
	0.4412	0.4693	0.4668	0.4468	0.4806	0.4679	0.4834	0.4558	0.4592	0.4521	0.46	0.4611	0.4637	0.4721	0.4679	0.4321	0.4481	0.4513	0.4361	0.4708	0.4666	0.4342	0.4611	0.4547	0.4513	0.4702	0.4663	0.3512	0.3795	0.3725	0.3533	0.3558	0.3652	0.3492	0.3737	0.3592	0.3671	0.3491	0.3616	0.3547	0.3658	0.3743
	0.4395	0.4662	0.4647	0.4444	0.4776	0.4638	0.48	0.4505	0.4547	0.4491	0.4624	0.4593	0.4586	0.4665	0.4634	0.4272	0.4428	0.4463	0.4314	0.4649	0.4616	0.4296	0.4567	0.4453	0.4461	0.468	0.4611	0.3497	0.3772	0.3705	0.3496	0.352	0.3647	0.3451	0.3697	0.3547	0.3627	0.3454	0.3566	0.3538	0.3641	0.3836
	0.4378	0.4649	0.4625	0.4425	0.4757	0.4615	0.4757	0.4468	0.4501	0.4476	0.4572	0.4576	0.4547	0.4625	0.4587	0.4229	0.4386	0.4415	0.4267	0.459	0.4556	0.4252	0.4516	0.4416	0.441	0.4626	0.4565	0.3487	0.3758	0.3691	0.3465	0.3485	0.3668	0.3417	0.3667	0.3511	0.3596	0.3416	0.3527	0.3593	0.3638	0.3718
	0.4372	0.4638	0.4612	0.4584	0.4742	0.46	0.4731	0.4434	0.4468	0.4462	0.4546	0.4558	0.451	0.4583	0.4548	0.4201	0.4349	0.437	0.4225	0.4552	0.4519	0.4219	0.4477	0.4362	0.4368	0.4614	0.4525	0.3475	0.3786	0.3753	0.3434	0.3452	0.362	0.3385	0.3627	0.3478	0.3567	0.3401	0.3585	0.3518	0.3633	0.3723
	0.4368	0.4645	0.4602	0.44	0.4733	0.4585	0.4704	0.4404	0.4436	0.445	0.4555	0.4549	0.4481	0.4548	0.4535	0.416	0.4301	0.4336	0.4186	0.4505	0.4509	0.4171	0.4438	0.4322	0.4379	0.4504	0.4477	0.3465	0.3783	0.3655	0.3402	0.3422	0.3581	0.3346	0.3592	0.344	0.353	0.3388	0.4687	0.3516	0.362	0.3701
	0.4359	0.4613	0.4592	0.4372	0.4717	0.4581	0.4669	0.4373	0.4402	0.4441	0.4525	0.4534	0.4442	0.4516	0.448	0.4122	0.427	0.4292	0.4142	0.4461	0.4425	0.4133	0.4402	0.4283	0.4285	0.4459	0.4433	0.3458	0.3732	0.3652	0.3374	0.3391	0.3517	0.3321	0.3557	0.3427	0.3501	0.3322	0.3486	0.3508	0.3614	0.3678
	0.4355	0.4612	0.4587	0.4398	0.471	0.4558	0.4634	0.4344	0.4374	0.4437	0.4512	0.4529	0.4413	0.4481	0.4454	0.4091	0.4232	0.4253	0.4104	0.4425	0.443	0.4092	0.4358	0.4244	0.4245	0.4419	0.4402	0.3451	0.3714	0.3637	0.3348	0.3362	0.3539	0.3294	0.353	0.3382	0.348	0.3287	0.3397	0.3508	0.3613	0.3681
	0.4351	0.4603	0.4605	0.4349	0.4693	0.4538	0.4606	0.431	0.4345	0.442	0.4511	0.4515	0.438	0.4452	0.4411	0.4052	0.4188	0.421	0.4071	0.4386	0.4357	0.4057	0.4324	0.4205	0.421	0.4379	0.4346	0.3443	0.3706	0.3627	0.3318	0.3335	0.3529	0.3263	0.3496	0.3352	0.3448	0.3258	0.3367	0.35	0.3608	0.3681
	0.4349	0.4598	0.4577	0.4345	0.4695	0.4534	0.459	0.4287	0.4318	0.4424	0.45	0.4517	0.4353	0.4418	0.4384	0.4022	0.4164	0.4178	0.4034	0.4351	0.431	0.4024	0.4288	0.4168	0.4171	0.4354	0.4314	0.3439	0.3723	0.3615	0.3294	0.3309	0.348	0.3237	0.347	0.332	0.3415	0.3228	0.4775	0.3592	0.3604	0.3692
	0.4348	0.4592	0.4615	0.4338	0.4677	0.4529	0.4562	0.4262	0.4303	0.441	0.4488	0.4504	0.4325	0.4392	0.4352	0.3988	0.4127	0.4143	0.4006	0.431	0.4331	0.3993	0.4242	0.4135	0.4138	0.4301	0.4277	0.3434	0.3696	0.3609	0.3269	0.328	0.3445	0.3203	0.3435	0.3299	0.3387	0.3203	0.3307	0.3487	0.3599	0.3668
	0.4347	0.4591	0.4575	0.4328	0.4677	0.4523	0.454	0.4236	0.4269	0.4408	0.4519	0.4495	0.4294	0.436	0.4324	0.3954	0.4095	0.4112	0.3975	0.4277	0.4235	0.3955	0.4207	0.4098	0.41	0.4384	0.4239	0.3428	0.3701	0.3598	0.3244	0.3255	0.3388	0.3175	0.3406	0.3262	0.3363	0.3174	0.3277	0.3487	0.3596	0.3695
	0.4344	0.4593	0.4562	0.4529	0.4662	0.451	0.4512	0.4216	0.4239	0.439	0.451	0.4485	0.4266	0.4333	0.4292	0.393	0.4059	0.4074	0.3933	0.424	0.4201	0.3917	0.4176	0.4057	0.4075	0.4229	0.4202	0.3417	0.3682	0.3596	0.3218	0.3229	0.3367	0.3148	0.3377	0.3231	0.3335	0.3143	0.3245	0.3488	0.3593	0.3688
	0.4341	0.4587	0.4572	0.4312	0.4653	0.4496	0.4483	0.4187	0.4215	0.4394	0.4498	0.4479	0.424	0.4307	0.4261	0.3892	0.4032	0.4039	0.3902	0.4205	0.427	0.3887	0.4137	0.4027	0.4029	0.4216	0.417	0.3408	0.367	0.3587	0.319	0.3203	0.3355	0.3119	0.3344	0.3202	0.3309	0.3114	0.3214	0.3485	0.3595	0.3668
	0.4337	0.458	0.4563	0.4476	0.4649	0.449	0.4463	0.4162	0.4212	0.4382	0.4501	0.447	0.4211	0.4278	0.4239	0.3862	0.3995	0.4004	0.387	0.4166	0.4229	0.3853	0.4101	0.3996	0.3993	0.4151	0.4131	0.3402	0.3683	0.3601	0.3163	0.3175	0.3265	0.3089	0.332	0.3178	0.3281	0.3087	0.3281	0.3478	0.3589	0.366
	0.4358	0.4579	0.4558	0.4296	0.4646	0.4482	0.4434	0.4136	0.4169	0.4379	0.45	0.4474	0.4198	0.4249	0.4208	0.3826	0.3967	0.3972	0.3838	0.4137	0.4093	0.3822	0.4066	0.3962	0.3959	0.4115	0.4093	0.3401	0.3661	0.3572	0.3142	0.3153	0.3343	0.3062	0.3287	0.315	0.3252	0.3075	0.3213	0.3482	0.359	0.3671
	0.4337	0.4576	0.4555	0.4288	0.4642	0.4477	0.4411	0.4118	0.4141	0.4371	0.4449	0.4462	0.4163	0.422	0.426	0.3799	0.3932	0.3942	0.3806	0.411	0.4113	0.3792	0.4031	0.3927	0.3928	0.4081	0.4058	0.3391	0.3654	0.3576	0.312	0.3129	0.3213	0.3037	0.3264	0.3116	0.3233	0.3032	0.3126	0.3482	0.3591	0.367
	0.4337	0.457	0.4578	0.4408	0.4632	0.4468	0.4385	0.4091	0.4172	0.4363	0.4453	0.4455	0.4128	0.4196	0.4153	0.3764	0.39	0.3906	0.3773	0.4067	0.4025	0.3756	0.3995	0.3887	0.3885	0.4056	0.4023	0.3389	0.3667	0.3565	0.3092	0.31	0.3209	0.3007	0.3228	0.3086	0.3207	0.3006	0.3098	0.3486	0.3587	0.367
	0.4332	0.4566	0.4547	0.4282	0.4621	0.4459	0.4368	0.4064	0.4092	0.4361	0.4449	0.4443	0.41	0.4164	0.4125	0.3735	0.3859	0.3871	0.3738	0.4031	0.4048	0.3724	0.3956	0.3859	0.3853	0.4007	0.3984	0.3376	0.3632	0.3551	0.3066	0.3074	0.3179	0.2978	0.3197	0.3056	0.3183	0.2988	0.3125	0.347	0.3579	0.366
	0.4331	0.4572	0.4551	0.4391	0.4615	0.4453	0.4336	0.4045	0.4072	0.4347	0.4432	0.4439	0.4076	0.4138	0.4096	0.3702	0.3832	0.3841	0.3709	0.3996	0.3952	0.3688	0.3927	0.382	0.3818	0.397	0.3947	0.3377	0.3635	0.3582	0.304	0.305	0.3153	0.2951	0.3172	0.3025	0.3152	0.2955	0.3042	0.3475	0.3581	0.3647
	0.4331	0.4566	0.455	0.4258	0.4606	0.4443	0.4312	0.4022	0.4051	0.4349	0.4435	0.4436	0.4058	0.412	0.407	0.3672	0.3798	0.3812	0.3676	0.3961	0.3919	0.3659	0.3891	0.3783	0.379	0.3951	0.3911	0.3365	0.3635	0.3541	0.3015	0.3025	0.3094	0.2923	0.3141	0.2993	0.3127	0.2923	0.3496	0.3468	0.3577	0.3692
	0.4325	0.4566	0.4541	0.433	0.4599	0.4431	0.4296	0.3993	0.4022	0.4344	0.4424	0.4428	0.402	0.4083	0.4044	0.3641	0.3764	0.3776	0.3647	0.3926	0.3889	0.3629	0.3857	0.3753	0.3749	0.3912	0.3876	0.3367	0.3609	0.3537	0.2991	0.2998	0.3159	0.2895	0.3113	0.2974	0.3109	0.2892	0.2987	0.3469	0.3584	0.3643
	0.4321	0.4558	0.4547	0.4245	0.4595	0.4426	0.4271	0.3973	0.3997	0.4332	0.4508	0.4426	0.3993	0.4055	0.402	0.3611	0.3736	0.3743	0.3614	0.3895	0.3852	0.3596	0.3823	0.3718	0.3717	0.3868	0.3845	0.3359	0.3621	0.3526	0.2969	0.2973	0.3045	0.2872	0.3085	0.2946	0.3072	0.2865	0.2974	0.3529	0.3577	0.3683
	0.4325	0.4561	0.4551	0.4236	0.4584	0.442	0.4244	0.3947	0.3973	0.4332	0.4415	0.4417	0.3969	0.4033	0.3997	0.3581	0.3698	0.371	0.3582	0.3861	0.3819	0.356	0.3787	0.3683	0.3685	0.3853	0.3802	0.3349	0.3601	0.3538	0.2945	0.2947	0.3055	0.2837	0.3062	0.2913	0.3044	0.2838	0.2937	0.3473	0.3578	0.3645
	0.432	0.4557	0.4533	0.4228	0.4577	0.4415	0.4222	0.3944	0.4012	0.4326	0.442	0.4414	0.3946	0.4007	0.3962	0.3548	0.3667	0.3676	0.3548	0.3826	0.3789	0.353	0.3747	0.3653	0.3664	0.3826	0.3766	0.3348	0.3596	0.3515	0.2921	0.2925	0.3002	0.2809	0.3035	0.2897	0.3023	0.2815	0.2908	0.3468	0.3605	0.3649
	0.4322	0.4565	0.4539	0.4308	0.4575	0.4421	0.4201	0.3907	0.3932	0.4324	0.4406	0.441	0.3921	0.3985	0.3944	0.3523	0.3635	0.3645	0.3524	0.3799	0.3756	0.3503	0.372	0.3617	0.3616	0.376	0.3731	0.3339	0.3602	0.351	0.2903	0.2899	0.2991	0.2783	0.2996	0.2857	0.2985	0.2793	0.3024	0.3531	0.3571	0.3679
	0.432	0.4556	0.4538	0.4221	0.4564	0.4399	0.4176	0.3884	0.391	0.4318	0.4433	0.4405	0.3893	0.3956	0.3914	0.3489	0.3605	0.3616	0.3487	0.3762	0.3721	0.3472	0.3682	0.358	0.3581	0.3722	0.3698	0.3337	0.3613	0.3555	0.2873	0.2879	0.295	0.2762	0.2971	0.2826	0.2963	0.2766	0.2872	0.3465	0.3577	0.3656
	0.4319	0.4553	0.4569	0.4208	0.4556	0.4394	0.4152	0.3862	0.3882	0.4307	0.4384	0.4397	0.3868	0.3929	0.3888	0.3458	0.357	0.3581	0.3458	0.3731	0.3687	0.3434	0.3646	0.3549	0.3545	0.3707	0.3664	0.3333	0.3589	0.3516	0.2853	0.2852	0.2938	0.2733	0.2941	0.2798	0.2934	0.2748	0.2859	0.3461	0.3569	0.3648
	0.4314	0.4554	0.4541	0.4222	0.4552	0.4388	0.4132	0.3833	0.3861	0.4303	0.4383	0.4396	0.3839	0.3905	0.3862	0.3429	0.354	0.355	0.3434	0.3698	0.3658	0.3408	0.3615	0.3525	0.351	0.3658	0.3626	0.332	0.3634	0.3507	0.2828	0.2828	0.2929	0.2705	0.2913	0.2768	0.2914	0.271	0.2823	0.3458	0.3568	0.3665
	0.4323	0.455	0.4554	0.4199	0.4545	0.4383	0.4105	0.3828	0.3835	0.4296	0.4387	0.4385	0.3814	0.3873	0.3836	0.3398	0.3504	0.3518	0.3397	0.3662	0.3661	0.337	0.3579	0.3479	0.352	0.362	0.3588	0.3315	0.3596	0.353	0.2799	0.2798	0.2883	0.2675	0.2882	0.2742	0.2897	0.2686	0.2768	0.3458	0.3562	0.3663
	0.4319	0.4548	0.4531	0.4191	0.4534	0.4375	0.4084	0.3788	0.3813	0.4288	0.4373	0.438	0.3787	0.3849	0.381	0.3373	0.3475	0.3485	0.3366	0.3627	0.3634	0.3341	0.3547	0.3444	0.3449	0.3605	0.3555	0.3312	0.3558	0.348	0.278	0.2777	0.2927	0.2645	0.2857	0.2707	0.2859	0.2652	0.2737	0.3458	0.3562	0.365
	0.4312	0.4547	0.4524	0.4247	0.4531	0.4369	0.4063	0.3767	0.3792	0.429	0.4378	0.4378	0.3762	0.3824	0.3783	0.3338	0.3442	0.3453	0.3335	0.3598	0.3568	0.331	0.3506	0.3415	0.3416	0.3569	0.3521	0.3304	0.3549	0.3542	0.2754	0.2752	0.2833	0.262	0.2828	0.2687	0.283	0.2628	0.3111	0.3454	0.3561	0.3641
	0.4315	0.4547	0.4537	0.4182	0.4525	0.4367	0.404	0.3752	0.3764	0.4283	0.4406	0.437	0.3737	0.3799	0.3758	0.3309	0.3414	0.3423	0.3303	0.3564	0.3521	0.3276	0.3475	0.3384	0.3414	0.3511	0.3487	0.3302	0.3544	0.3521	0.2731	0.2723	0.2812	0.2591	0.28	0.2655	0.2803	0.2604	0.2682	0.3459	0.3574	0.3646
	0.4313	0.4548	0.4532	0.417	0.4521	0.438	0.4016	0.3722	0.3745	0.4273	0.4354	0.4369	0.3712	0.3773	0.3736	0.3277	0.3382	0.3389	0.3274	0.3529	0.3506	0.3244	0.3441	0.3349	0.3348	0.3522	0.3447	0.3293	0.3613	0.3458	0.2708	0.2701	0.2792	0.2564	0.2769	0.2622	0.2781	0.2573	0.2652	0.3456	0.3556	0.3656
	0.4312	0.4546	0.4523	0.4168	0.451	0.4346	0.3992	0.3699	0.3717	0.4269	0.4348	0.4368	0.3683	0.3746	0.3703	0.3246	0.3348	0.3357	0.3239	0.3497	0.3489	0.3214	0.341	0.3321	0.3321	0.3496	0.3412	0.3288	0.3553	0.3461	0.2681	0.2678	0.2846	0.2538	0.2741	0.2594	0.275	0.2549	0.2645	0.3454	0.3563	0.3647
	0.4313	0.4542	0.4526	0.4196	0.4505	0.434	0.3969	0.3677	0.3696	0.4265	0.4358	0.4355	0.3662	0.3722	0.3678	0.3218	0.332	0.3327	0.321	0.3465	0.3489	0.3184	0.3377	0.3285	0.3293	0.3404	0.338	0.3284	0.357	0.3454	0.2657	0.2655	0.2744	0.2508	0.2714	0.2566	0.2723	0.2531	0.2667	0.3455	0.3558	0.3672
	0.4313	0.4545	0.4523	0.4152	0.4492	0.4331	0.3948	0.3654	0.3673	0.4257	0.4333	0.4351	0.3632	0.3699	0.365	0.3185	0.3285	0.3295	0.3177	0.3436	0.3429	0.3149	0.3337	0.3256	0.325	0.3452	0.3342	0.3276	0.3542	0.3445	0.2635	0.2629	0.2711	0.2483	0.2687	0.2539	0.2708	0.2498	0.2577	0.3457	0.356	0.3635
	0.4314	0.454	0.4527	0.4147	0.4491	0.4329	0.3929	0.3632	0.3652	0.4253	0.4346	0.4344	0.3615	0.3669	0.3628	0.3159	0.3257	0.3267	0.3151	0.3402	0.3361	0.3124	0.331	0.3223	0.3222	0.3379	0.331	0.3274	0.3521	0.344	0.261	0.2603	0.2717	0.2456	0.2659	0.2516	0.269	0.2484	0.4061	0.3572	0.3556	0.3666
	0.4306	0.4534	0.4525	0.4146	0.4484	0.4331	0.3901	0.3604	0.3628	0.4253	0.4326	0.4339	0.3583	0.3646	0.3601	0.3125	0.3223	0.323	0.312	0.3368	0.3328	0.3089	0.3271	0.3182	0.3181	0.3306	0.3277	0.3269	0.3519	0.3433	0.2589	0.2583	0.2728	0.2428	0.2629	0.249	0.2658	0.2479	0.2535	0.3449	0.3554	0.3735
	0.4311	0.4537	0.4523	0.4131	0.448	0.4315	0.3878	0.3587	0.3609	0.4246	0.4381	0.4334	0.3559	0.3618	0.3572	0.3099	0.3191	0.3201	0.3087	0.3337	0.3293	0.3057	0.324	0.3153	0.3147	0.3299	0.3243	0.3265	0.3505	0.3444	0.2565	0.2559	0.2704	0.24	0.2607	0.247	0.2632	0.2423	0.2558	0.345	0.3557	0.3645
	0.4307	0.4531	0.4518	0.4126	0.4473	0.4306	0.3855	0.3567	0.3586	0.424	0.4318	0.4329	0.3533	0.3595	0.3547	0.3065	0.3157	0.3167	0.3059	0.3302	0.3264	0.3027	0.3204	0.3122	0.3114	0.3268	0.3205	0.3258	0.3509	0.3446	0.254	0.2529	0.2688	0.2373	0.2573	0.2433	0.2604	0.2393	0.2466	0.3467	0.3552	0.3639
	0.4306	0.4533	0.4535	0.4123	0.4467	0.4304	0.3836	0.3543	0.3562	0.4239	0.4329	0.432	0.3509	0.3568	0.3525	0.3037	0.3124	0.3137	0.3027	0.3269	0.3229	0.2994	0.3172	0.308	0.3083	0.3216	0.3169	0.3252	0.349	0.3417	0.2518	0.2506	0.2688	0.2345	0.2543	0.2396	0.2569	0.2365	0.2442	0.3446	0.3555	0.366
	0.4306	0.4537	0.4518	0.4249	0.4461	0.4301	0.3819	0.3517	0.3556	0.423	0.4341	0.4321	0.3499	0.3541	0.3499	0.301	0.3097	0.3109	0.2995	0.3234	0.3199	0.2964	0.3134	0.3052	0.3056	0.3161	0.3137	0.3247	0.349	0.3422	0.2493	0.2481	0.2651	0.2319	0.2518	0.2366	0.2549	0.2337	0.2425	0.3476	0.3554	0.3623
	0.4307	0.4537	0.4513	0.4111	0.4459	0.4292	0.3801	0.3496	0.352	0.4225	0.4315	0.4315	0.3458	0.352	0.3474	0.2976	0.3066	0.3074	0.297	0.3206	0.3164	0.2933	0.3102	0.3023	0.3019	0.3126	0.3104	0.3243	0.3478	0.3411	0.247	0.2455	0.2627	0.2291	0.249	0.2337	0.2532	0.2314	0.2386	0.3442	0.3548	0.3627
	0.4302	0.4533	0.4518	0.4174	0.4446	0.4282	0.3765	0.3479	0.3495	0.4218	0.4297	0.4307	0.3431	0.3486	0.3451	0.2944	0.3033	0.3045	0.2934	0.3175	0.3132	0.29	0.3068	0.2983	0.2989	0.3098	0.3069	0.3239	0.3473	0.341	0.2449	0.2432	0.2599	0.2267	0.2464	0.2324	0.2508	0.2289	0.2358	0.3468	0.3548	0.3642
	0.4301	0.453	0.452	0.4096	0.4441	0.4275	0.3746	0.3451	0.3475	0.4216	0.432	0.4311	0.3406	0.3464	0.3422	0.2922	0.3003	0.3013	0.2907	0.3143	0.3147	0.2873	0.3035	0.2953	0.2964	0.3062	0.3034	0.3228	0.3568	0.3395	0.2424	0.2406	0.2499	0.224	0.2436	0.2288	0.2484	0.2266	0.2377	0.3442	0.3547	0.3633
	0.43	0.4529	0.4519	0.4086	0.443	0.4266	0.372	0.3426	0.3451	0.4213	0.4336	0.43	0.3379	0.344	0.3396	0.289	0.297	0.2979	0.2875	0.3108	0.3074	0.284	0.2999	0.2917	0.2925	0.3031	0.2999	0.3228	0.3461	0.3388	0.24	0.2384	0.2571	0.221	0.2409	0.2257	0.2449	0.2246	0.364	0.3438	0.3543	0.365
	0.4301	0.4527	0.4511	0.4279	0.4425	0.4262	0.3703	0.3409	0.3427	0.4207	0.4294	0.4293	0.3356	0.3414	0.3374	0.2857	0.2944	0.2952	0.2846	0.3077	0.3118	0.2809	0.2968	0.2889	0.2888	0.3056	0.2968	0.322	0.3453	0.343	0.2377	0.2362	0.2517	0.2183	0.2378	0.2231	0.2415	0.2224	0.2282	0.3447	0.3547	0.3631
	0.4297	0.4526	0.4529	0.4102	0.4424	0.4254	0.3682	0.3386	0.3405	0.4199	0.4275	0.4287	0.3329	0.3388	0.3339	0.2829	0.2915	0.2921	0.2814	0.3048	0.3005	0.2778	0.2935	0.2855	0.2856	0.2995	0.2931	0.3216	0.3506	0.3378	0.2355	0.2332	0.2421	0.2157	0.235	0.221	0.2396	0.2182	0.2255	0.3437	0.3587	0.3629
	0.4303	0.4526	0.4514	0.4206	0.4417	0.4255	0.3656	0.3361	0.3384	0.42	0.4268	0.4285	0.3307	0.337	0.3319	0.2808	0.2882	0.2889	0.2785	0.3016	0.2975	0.275	0.2903	0.2828	0.2826	0.2929	0.2896	0.321	0.3448	0.3371	0.2327	0.2308	0.2424	0.2131	0.2323	0.2182	0.2365	0.2165	0.2238	0.3445	0.3541	0.3632
	0.4294	0.4523	0.4534	0.408	0.4404	0.4243	0.3635	0.3336	0.3357	0.4191	0.4331	0.428	0.3279	0.3338	0.3291	0.2767	0.2849	0.286	0.2752	0.298	0.2939	0.2715	0.2864	0.2795	0.2807	0.2925	0.2864	0.3205	0.344	0.3368	0.2308	0.2291	0.2345	0.2104	0.2297	0.2152	0.2351	0.2132	0.2196	0.3441	0.3544	0.3621
	0.4298	0.4527	0.4523	0.4215	0.4404	0.4241	0.3615	0.332	0.3346	0.419	0.4262	0.4278	0.3256	0.3317	0.3267	0.2741	0.2819	0.2825	0.2728	0.2955	0.2971	0.2688	0.2835	0.2762	0.276	0.2902	0.2832	0.3202	0.3447	0.3372	0.2286	0.2261	0.2436	0.2077	0.2271	0.2131	0.2325	0.211	0.2247	0.3545	0.3545	0.3631
	0.4293	0.4522	0.4545	0.4066	0.4396	0.4235	0.3593	0.3294	0.3314	0.4188	0.4291	0.4272	0.3234	0.3287	0.3247	0.2716	0.2787	0.2796	0.2694	0.2918	0.2878	0.2658	0.2803	0.2728	0.2727	0.2827	0.28	0.3197	0.3431	0.3413	0.2259	0.2237	0.241	0.2054	0.2242	0.2088	0.2297	0.2085	0.2143	0.3514	0.3542	0.3627
	0.4295	0.4523	0.4506	0.4044	0.4387	0.4222	0.3566	0.3277	0.3292	0.4173	0.4262	0.426	0.3206	0.3262	0.3217	0.2683	0.2758	0.2763	0.2664	0.2884	0.2844	0.2625	0.2768	0.2698	0.2701	0.2825	0.276	0.319	0.3443	0.3356	0.2242	0.2215	0.2314	0.2027	0.2219	0.206	0.2266	0.2061	0.2118	0.3439	0.3546	0.3644
	0.4294	0.4519	0.4517	0.4199	0.4382	0.4217	0.3545	0.3254	0.3304	0.417	0.4278	0.4262	0.3184	0.3243	0.3196	0.2657	0.2729	0.2736	0.2634	0.2857	0.2814	0.2594	0.2737	0.2664	0.2662	0.2756	0.2728	0.3187	0.3439	0.3351	0.2217	0.2189	0.2329	0.1999	0.2186	0.2042	0.2245	0.2032	0.2089	0.3434	0.3541	0.3621
	0.4292	0.4516	0.4508	0.4047	0.4379	0.4214	0.3526	0.3232	0.3248	0.4167	0.4253	0.4256	0.3155	0.3212	0.3167	0.2624	0.2695	0.2702	0.2603	0.2823	0.2788	0.2565	0.2702	0.2629	0.2633	0.2722	0.2693	0.3181	0.3417	0.3346	0.2194	0.2165	0.2354	0.1973	0.2164	0.2024	0.2228	0.2005	0.2066	0.3444	0.3542	0.3636
	0.4297	0.4516	0.4524	0.4292	0.4371	0.4221	0.3501	0.3212	0.3226	0.4165	0.4246	0.4251	0.3135	0.3189	0.3144	0.2592	0.2665	0.2675	0.2574	0.279	0.2753	0.2533	0.2689	0.2617	0.2597	0.2729	0.2661	0.3176	0.3407	0.3347	0.2171	0.2143	0.2361	0.1947	0.2133	0.1985	0.2202	0.1986	0.2041	0.3436	0.3541	0.373
	0.4293	0.4516	0.4501	0.4037	0.4371	0.4201	0.3482	0.3186	0.3207	0.4157	0.4235	0.4245	0.3104	0.3165	0.3116	0.2578	0.2635	0.264	0.2545	0.2756	0.2726	0.2502	0.2637	0.2576	0.2568	0.2681	0.2624	0.3171	0.342	0.3335	0.2149	0.2115	0.2273	0.1922	0.2105	0.1952	0.2163	0.1953	0.2011	0.3431	0.3539	0.362
	0.4291	0.452	0.4507	0.4061	0.4363	0.4196	0.3458	0.316	0.3182	0.4154	0.4238	0.4239	0.3084	0.3141	0.309	0.2538	0.2605	0.2612	0.2517	0.2732	0.2695	0.2476	0.2604	0.2537	0.2535	0.2621	0.2594	0.3165	0.3408	0.3327	0.2123	0.2092	0.2233	0.1895	0.2078	0.1923	0.2139	0.1926	0.1999	0.3437	0.3548	0.3624
	0.4294	0.4515	0.4535	0.4032	0.4361	0.4193	0.3438	0.3147	0.3163	0.4147	0.4237	0.4235	0.306	0.3113	0.3072	0.2508	0.2575	0.2581	0.249	0.2699	0.266	0.2447	0.2572	0.2506	0.2505	0.2589	0.2562	0.3164	0.3411	0.3328	0.2102	0.2072	0.2259	0.187	0.2054	0.1898	0.2121	0.1904	0.2359	0.3432	0.3542	0.3624
	0.429	0.4518	0.4506	0.406	0.435	0.4181	0.3417	0.3119	0.314	0.4143	0.4217	0.423	0.3033	0.3094	0.3042	0.248	0.2547	0.2549	0.2457	0.2662	0.2629	0.2413	0.254	0.2471	0.2469	0.2572	0.2525	0.3153	0.3405	0.3444	0.2076	0.2043	0.2216	0.184	0.2023	0.1871	0.2085	0.1887	0.2557	0.3428	0.3535	0.3622
	0.4285	0.4513	0.4498	0.401	0.4341	0.4177	0.3397	0.3101	0.3113	0.4135	0.4229	0.4224	0.3003	0.3063	0.3016	0.2447	0.2514	0.252	0.2427	0.2628	0.2593	0.2386	0.2506	0.2442	0.244	0.2559	0.2489	0.3151	0.3424	0.3316	0.2054	0.2021	0.2198	0.1816	0.1997	0.1844	0.2068	0.1852	0.1904	0.3432	0.3533	0.3623
	0.4284	0.4512	0.4499	0.4047	0.4339	0.4177	0.3373	0.3074	0.3095	0.4133	0.4211	0.4217	0.298	0.3038	0.2993	0.242	0.2483	0.2491	0.24	0.2602	0.2565	0.2355	0.2476	0.2411	0.2408	0.2541	0.2457	0.3148	0.3404	0.3326	0.2031	0.1998	0.2193	0.1787	0.1971	0.1815	0.2047	0.1824	0.1877	0.3429	0.3535	0.361
	0.4285	0.4511	0.4506	0.4191	0.4334	0.4163	0.3348	0.306	0.3074	0.4129	0.4202	0.4215	0.2956	0.3015	0.297	0.2393	0.2454	0.2464	0.2369	0.2572	0.2534	0.2323	0.244	0.2379	0.2377	0.2456	0.243	0.3138	0.3393	0.3307	0.2008	0.1972	0.2088	0.1761	0.1942	0.1788	0.2013	0.1798	0.2691	0.3497	0.353	0.3619
	0.4288	0.4513	0.4498	0.3991	0.4324	0.4153	0.3332	0.3035	0.305	0.4123	0.4209	0.421	0.293	0.2987	0.2946	0.2364	0.2423	0.2437	0.2338	0.2539	0.2509	0.2293	0.2407	0.2347	0.234	0.2449	0.239	0.3135	0.3367	0.3296	0.1987	0.1948	0.2117	0.1736	0.1916	0.1759	0.1993	0.1774	0.1824	0.3424	0.353	0.3613
	0.4283	0.4509	0.4498	0.3974	0.4316	0.4152	0.3311	0.3012	0.3034	0.4124	0.4203	0.421	0.2908	0.2967	0.292	0.2338	0.2395	0.2404	0.231	0.2511	0.2472	0.2265	0.2376	0.2318	0.2317	0.2415	0.2359	0.3131	0.336	0.3295	0.1965	0.1926	0.2138	0.1711	0.1893	0.1742	0.1964	0.1749	0.1912	0.3423	0.3528	0.3616
	0.4284	0.4506	0.4496	0.3986	0.431	0.4159	0.3288	0.2993	0.3007	0.4113	0.4181	0.4203	0.2883	0.2939	0.2895	0.2308	0.2363	0.2371	0.2281	0.2475	0.2439	0.2234	0.2341	0.2282	0.228	0.2365	0.2323	0.3127	0.3364	0.329	0.1942	0.1901	0.2121	0.1683	0.186	0.1705	0.1937	0.1726	0.1792	0.3421	0.3527	0.3603
	0.4284	0.4503	0.4512	0.4153	0.4308	0.416	0.3262	0.2977	0.2984	0.4112	0.4201	0.4195	0.2861	0.2916	0.2872	0.2278	0.2337	0.2345	0.2252	0.2445	0.2408	0.2212	0.2313	0.2256	0.2249	0.233	0.2296	0.3117	0.3367	0.3274	0.1918	0.1876	0.2078	0.1663	0.1836	0.1679	0.1916	0.1708	0.1747	0.347	0.353	0.3609
	0.4281	0.4501	0.4493	0.3958	0.4297	0.4133	0.3246	0.2948	0.296	0.4106	0.4212	0.4196	0.2835	0.2893	0.2849	0.225	0.2301	0.2308	0.2222	0.2412	0.2379	0.2175	0.2279	0.2221	0.2217	0.2293	0.2261	0.3123	0.3387	0.3275	0.1896	0.1853	0.2072	0.1635	0.1809	0.1663	0.189	0.1672	0.1715	0.3431	0.3527	0.3602
	0.428	0.4502	0.4502	0.406	0.4292	0.4128	0.3224	0.2926	0.2944	0.4099	0.4168	0.4188	0.2809	0.2874	0.2821	0.2219	0.2274	0.228	0.2193	0.2382	0.2409	0.2144	0.2246	0.2192	0.2189	0.2276	0.2228	0.3112	0.3392	0.3278	0.1876	0.1832	0.2022	0.1612	0.1784	0.1626	0.1868	0.1662	0.1699	0.3422	0.3524	0.3642
	0.428	0.4507	0.4498	0.42	0.4285	0.4115	0.3197	0.2917	0.2919	0.4095	0.4174	0.4181	0.2784	0.2843	0.2796	0.219	0.2243	0.225	0.2164	0.2353	0.2358	0.2114	0.2212	0.2158	0.2161	0.2247	0.2194	0.3105	0.3339	0.3285	0.185	0.1806	0.2003	0.158	0.1755	0.1611	0.1845	0.1631	0.172	0.3468	0.3522	0.3614
	0.428	0.4504	0.4492	0.3961	0.428	0.4113	0.3183	0.2885	0.2921	0.4093	0.4183	0.4178	0.276	0.282	0.2772	0.2164	0.2216	0.2221	0.2136	0.2325	0.2379	0.2085	0.218	0.2132	0.2123	0.2191	0.2162	0.3102	0.334	0.3257	0.1829	0.1785	0.1975	0.1556	0.1729	0.1572	0.1824	0.1601	0.1639	0.3442	0.3526	0.3624
	0.428	0.4503	0.4523	0.4056	0.427	0.412	0.3153	0.2861	0.2874	0.4088	0.4168	0.4172	0.2733	0.2793	0.2749	0.2134	0.2183	0.2197	0.2104	0.229	0.2361	0.2055	0.2149	0.2101	0.2098	0.2254	0.213	0.3093	0.335	0.3256	0.1807	0.1758	0.1957	0.153	0.1704	0.1546	0.1796	0.1607	0.1621	0.349	0.3521	0.3675
	0.4274	0.4502	0.4494	0.4051	0.4266	0.4109	0.3137	0.284	0.2882	0.4081	0.416	0.4169	0.271	0.2768	0.2722	0.2101	0.2153	0.2161	0.2075	0.2259	0.2224	0.2024	0.2114	0.2068	0.2064	0.2146	0.2095	0.3088	0.3315	0.3251	0.1784	0.1737	0.1939	0.1511	0.1681	0.1537	0.1777	0.1551	0.1596	0.3517	0.3526	0.3604
	0.4284	0.4497	0.4505	0.3948	0.426	0.4099	0.3115	0.2819	0.2834	0.4073	0.4157	0.4166	0.2686	0.2749	0.2701	0.2076	0.2125	0.2131	0.2048	0.2229	0.2195	0.1994	0.2086	0.2039	0.2034	0.2182	0.2064	0.3087	0.335	0.3251	0.1762	0.1713	0.1941	0.1483	0.1655	0.1493	0.1747	0.1538	0.1578	0.348	0.3521	0.3603
	0.4278	0.4499	0.4536	0.3936	0.4251	0.4092	0.3098	0.2803	0.2811	0.4073	0.4144	0.4163	0.2659	0.2725	0.2672	0.2053	0.2093	0.2101	0.2019	0.2198	0.2162	0.1967	0.2054	0.2004	0.1997	0.2073	0.2029	0.3079	0.3309	0.324	0.1737	0.1692	0.1869	0.1462	0.1632	0.1474	0.1719	0.1502	0.1681	0.3418	0.3555	0.3613
	0.4275	0.45	0.4507	0.3931	0.4249	0.4088	0.3077	0.2789	0.2824	0.407	0.4155	0.4154	0.2638	0.2698	0.2649	0.2022	0.2062	0.2074	0.199	0.217	0.2134	0.1938	0.2021	0.1978	0.1968	0.2036	0.2001	0.3078	0.3311	0.3245	0.1719	0.1667	0.1872	0.1446	0.1613	0.1458	0.1696	0.148	0.1516	0.3417	0.3541	0.3603
	0.4277	0.4502	0.4487	0.3922	0.424	0.4081	0.3049	0.2756	0.2768	0.4061	0.4137	0.415	0.2615	0.2672	0.2626	0.1992	0.2035	0.2041	0.1959	0.2137	0.2138	0.1907	0.1988	0.1945	0.1947	0.2015	0.1967	0.3068	0.3314	0.3231	0.1695	0.1642	0.1888	0.1435	0.1604	0.1439	0.1674	0.146	0.1494	0.3413	0.3535	0.3704
	0.428	0.4502	0.4483	0.4098	0.4235	0.4077	0.3035	0.2733	0.2746	0.4059	0.4173	0.4148	0.2589	0.2649	0.2598	0.1962	0.2002	0.2011	0.193	0.2106	0.2074	0.1883	0.1967	0.1909	0.1906	0.197	0.1933	0.307	0.3295	0.3219	0.1671	0.1619	0.1873	0.1427	0.1592	0.144	0.1654	0.145	0.1965	0.3417	0.3525	0.3608
	0.4275	0.4497	0.4484	0.3962	0.4228	0.4065	0.3009	0.2715	0.2757	0.4054	0.4143	0.414	0.2567	0.2627	0.2576	0.1934	0.1976	0.1983	0.1902	0.2077	0.2041	0.185	0.1926	0.1881	0.1878	0.1955	0.1899	0.3058	0.3291	0.3213	0.1651	0.1598	0.1849	0.1425	0.1588	0.1428	0.1636	0.1417	0.1456	0.3416	0.3551	0.3609
	0.4271	0.4494	0.45	0.3901	0.422	0.408	0.2987	0.2692	0.2704	0.4044	0.4177	0.4132	0.2538	0.2601	0.2549	0.1907	0.1946	0.1951	0.1873	0.2044	0.2009	0.1822	0.1895	0.185	0.1846	0.19	0.1867	0.3057	0.3279	0.3231	0.1626	0.1571	0.1814	0.1419	0.1586	0.1424	0.1628	0.1411	0.1464	0.3414	0.3514	0.3603
	0.4273	0.4493	0.4483	0.3879	0.422	0.4054	0.2969	0.2671	0.2681	0.4046	0.4124	0.4131	0.2521	0.2577	0.2524	0.188	0.1918	0.1924	0.1846	0.2016	0.1981	0.1791	0.1863	0.1822	0.1817	0.1983	0.1836	0.3051	0.3275	0.3207	0.1607	0.1552	0.1719	0.1422	0.1585	0.1424	0.1618	0.1398	0.1894	0.3413	0.3516	0.3628
	0.4276	0.4496	0.4486	0.3983	0.4209	0.4046	0.2945	0.2661	0.266	0.4039	0.4113	0.4128	0.2495	0.2557	0.2504	0.1852	0.1887	0.1895	0.1816	0.1982	0.2037	0.1762	0.1834	0.1788	0.1787	0.1839	0.1807	0.3045	0.3295	0.3201	0.1587	0.153	0.1714	0.1421	0.1585	0.1433	0.1611	0.1395	0.1727	0.3479	0.3512	0.3595
	0.4272	0.4536	0.448	0.3908	0.4203	0.4039	0.2921	0.2625	0.2637	0.4033	0.4121	0.4115	0.2466	0.2526	0.2476	0.1825	0.1856	0.1878	0.1788	0.1952	0.1988	0.1734	0.1799	0.1769	0.1755	0.1853	0.1769	0.3042	0.3266	0.3201	0.1568	0.151	0.1693	0.1424	0.1586	0.1423	0.161	0.1397	0.1436	0.3416	0.3518	0.3652
	0.4277	0.4493	0.4489	0.3895	0.4199	0.4034	0.2902	0.2603	0.2622	0.4033	0.4168	0.4128	0.2443	0.2507	0.246	0.1796	0.1829	0.1835	0.1759	0.1926	0.1892	0.1707	0.1794	0.1731	0.1726	0.1776	0.1744	0.3033	0.3263	0.3215	0.1544	0.1487	0.1684	0.1416	0.1584	0.1428	0.1613	0.1391	0.1431	0.3413	0.3514	0.3611
	0.4272	0.4493	0.4483	0.3932	0.4195	0.4038	0.2882	0.2588	0.2604	0.4027	0.4103	0.4111	0.242	0.2483	0.2431	0.177	0.1799	0.1806	0.1733	0.1897	0.1864	0.1681	0.1746	0.17	0.1697	0.1748	0.1715	0.303	0.3261	0.3191	0.1529	0.1469	0.1651	0.1416	0.1583	0.1427	0.1616	0.1396	0.1442	0.3409	0.3513	0.3607
	0.4271	0.4491	0.4478	0.3856	0.4186	0.4025	0.2859	0.2567	0.2572	0.4022	0.4142	0.4118	0.2452	0.2456	0.2408	0.1741	0.177	0.1778	0.1703	0.1865	0.1832	0.1646	0.1704	0.1672	0.1683	0.1759	0.1684	0.3023	0.3249	0.3182	0.1511	0.1453	0.1717	0.1418	0.1582	0.1425	0.1605	0.1407	0.143	0.3407	0.351	0.3605
	0.4273	0.4489	0.4484	0.3958	0.4179	0.4013	0.2837	0.2538	0.255	0.4018	0.4084	0.41	0.2372	0.2429	0.2381	0.1713	0.1742	0.1748	0.1673	0.1835	0.18	0.162	0.1675	0.1638	0.1639	0.1683	0.1659	0.3022	0.3284	0.3174	0.1498	0.1443	0.163	0.1417	0.1581	0.1436	0.1632	0.1407	0.1508	0.3415	0.3512	0.3606
	0.427	0.4493	0.4493	0.3847	0.4175	0.4025	0.283	0.2526	0.2535	0.4011	0.4098	0.4099	0.2348	0.2406	0.2359	0.1684	0.1713	0.1718	0.1644	0.1806	0.183	0.1593	0.1649	0.161	0.162	0.1678	0.1626	0.3017	0.3237	0.3233	0.1489	0.1441	0.1667	0.1417	0.1581	0.142	0.1617	0.1405	0.1429	0.3515	0.3512	0.3596
	0.427	0.4487	0.449	0.3945	0.4171	0.4	0.2795	0.2501	0.2513	0.4009	0.4084	0.409	0.2327	0.2385	0.2335	0.1661	0.1684	0.1696	0.1617	0.1778	0.1744	0.1569	0.1617	0.1583	0.1587	0.1652	0.1605	0.3014	0.3277	0.317	0.1487	0.1438	0.1566	0.1418	0.1587	0.142	0.1624	0.1394	0.1464	0.3412	0.351	0.363
	0.4268	0.4485	0.4477	0.3848	0.4161	0.4005	0.2774	0.2479	0.2494	0.4002	0.408	0.4086	0.2344	0.2361	0.2307	0.1628	0.1653	0.1662	0.159	0.1744	0.1715	0.1537	0.1591	0.1553	0.1565	0.1625	0.1587	0.3005	0.3231	0.3172	0.1484	0.1435	0.1745	0.1419	0.1584	0.143	0.1617	0.1398	0.2778	0.3411	0.3518	0.3598
	0.4269	0.4487	0.448	0.4027	0.4151	0.3996	0.2755	0.2461	0.2466	0.4003	0.41	0.4082	0.2276	0.234	0.2283	0.1607	0.1627	0.1638	0.1563	0.1718	0.1686	0.1515	0.1674	0.1535	0.1557	0.1624	0.1577	0.3008	0.3244	0.3188	0.1482	0.1435	0.1634	0.1417	0.1587	0.1427	0.161	0.1392	0.1547	0.3402	0.3511	0.3602
	0.4266	0.4485	0.4492	0.3818	0.4151	0.3987	0.2736	0.2435	0.2457	0.3999	0.4066	0.4081	0.2259	0.2314	0.2261	0.1582	0.16	0.1608	0.1538	0.169	0.166	0.1494	0.155	0.1504	0.1543	0.1597	0.1576	0.2996	0.3308	0.3158	0.1482	0.1433	0.1591	0.1419	0.1582	0.1419	0.1613	0.1393	0.2356	0.3403	0.351	0.358
	0.4262	0.4487	0.4482	0.409	0.4148	0.3982	0.2717	0.2415	0.2426	0.399	0.4068	0.4073	0.2233	0.2289	0.2245	0.1554	0.1575	0.1579	0.1511	0.1661	0.1627	0.1481	0.1537	0.1483	0.1539	0.1596	0.1571	0.2991	0.3222	0.315	0.1482	0.1431	0.1573	0.142	0.1581	0.1417	0.1611	0.139	0.143	0.34	0.3512	0.3598
	0.426	0.4485	0.4472	0.3822	0.4133	0.3973	0.2692	0.24	0.2404	0.3982	0.406	0.407	0.2248	0.2263	0.2215	0.1529	0.1544	0.1556	0.1488	0.1632	0.1669	0.1469	0.1529	0.1463	0.1534	0.1587	0.157	0.2991	0.3248	0.3168	0.1479	0.1432	0.1687	0.1413	0.1582	0.1429	0.1614	0.1391	0.1431	0.3402	0.3513	0.3588
	0.4258	0.4489	0.447	0.3796	0.4133	0.3971	0.2673	0.2374	0.2382	0.3977	0.4068	0.4068	0.2183	0.2243	0.219	0.1507	0.152	0.1528	0.1461	0.1606	0.158	0.1464	0.1524	0.1457	0.1531	0.159	0.1569	0.2982	0.3203	0.3136	0.1479	0.1431	0.1556	0.1415	0.1578	0.1417	0.1604	0.1388	0.1474	0.3505	0.3509	0.3582
	0.426	0.4484	0.4471	0.3817	0.4127	0.3966	0.2652	0.2354	0.2364	0.3977	0.4066	0.4061	0.2158	0.2219	0.2164	0.1489	0.1498	0.1504	0.1436	0.1583	0.1598	0.1461	0.1524	0.1445	0.153	0.1585	0.1568	0.2982	0.3193	0.3153	0.1484	0.1431	0.1627	0.1419	0.1584	0.1423	0.1615	0.1388	0.1429	0.3494	0.3507	0.3601
	0.4259	0.4485	0.4499	0.3809	0.412	0.396	0.2627	0.233	0.2356	0.3967	0.4045	0.4055	0.2133	0.2191	0.2141	0.1472	0.1476	0.1484	0.1415	0.1562	0.1549	0.1457	0.1517	0.1441	0.1532	0.159	0.1566	0.2972	0.3209	0.3136	0.1479	0.1431	0.1675	0.1423	0.1585	0.1424	0.1612	0.1404	0.146	0.3399	0.3506	0.3594
	0.4264	0.4478	0.4475	0.3961	0.4112	0.3956	0.2608	0.2311	0.2319	0.3965	0.4089	0.4052	0.2111	0.2171	0.2117	0.1468	0.1466	0.1475	0.1403	0.1556	0.1538	0.1458	0.1518	0.1448	0.1533	0.1578	0.1563	0.2969	0.3262	0.3135	0.1479	0.1428	0.1621	0.1423	0.1585	0.1424	0.1604	0.1395	0.1428	0.3529	0.3503	0.3593
	0.426	0.448	0.4489	0.3966	0.4106	0.3941	0.259	0.2295	0.2298	0.3964	0.4044	0.4046	0.2089	0.2151	0.2093	0.1459	0.1457	0.1461	0.1394	0.1545	0.1536	0.1458	0.153	0.1445	0.1541	0.1624	0.1565	0.2962	0.319	0.3137	0.1478	0.1431	0.1534	0.1421	0.1585	0.1428	0.161	0.1412	0.1458	0.3427	0.3507	0.3595
	0.4254	0.4494	0.447	0.3832	0.4103	0.3934	0.2569	0.2278	0.2279	0.3955	0.405	0.4042	0.2072	0.2125	0.2073	0.1461	0.1448	0.1456	0.1388	0.1541	0.1531	0.1456	0.1517	0.1438	0.1528	0.1578	0.1561	0.2961	0.32	0.3108	0.1478	0.1429	0.153	0.1417	0.158	0.1415	0.1606	0.1386	0.2313	0.3401	0.3506	0.359
	0.4256	0.448	0.452	0.3809	0.4096	0.3928	0.2548	0.2252	0.2257	0.3951	0.404	0.4037	0.2043	0.2101	0.2049	0.1455	0.145	0.1456	0.1384	0.154	0.153	0.1455	0.1517	0.1437	0.1527	0.1587	0.1564	0.295	0.3191	0.3114	0.1478	0.1428	0.1629	0.1417	0.1583	0.1417	0.1605	0.1397	0.1431	0.3425	0.353	0.3631
	0.4265	0.4477	0.448	0.395	0.409	0.3928	0.2525	0.2229	0.2237	0.3948	0.4057	0.4033	0.2019	0.208	0.2024	0.1456	0.145	0.1452	0.1385	0.154	0.1527	0.1456	0.1517	0.1438	0.1531	0.1579	0.1563	0.295	0.3187	0.3143	0.1478	0.1431	0.1583	0.1417	0.1582	0.142	0.1606	0.1386	0.1445	0.3501	0.351	0.3578
	0.4252	0.4477	0.4469	0.3992	0.4084	0.3928	0.2523	0.2209	0.2216	0.3943	0.4028	0.4028	0.1992	0.2054	0.2	0.1452	0.1447	0.1451	0.1382	0.1534	0.1525	0.1455	0.1515	0.1436	0.1525	0.1586	0.1563	0.294	0.3176	0.3228	0.1475	0.1426	0.1616	0.1415	0.158	0.1422	0.1603	0.1387	0.1425	0.3398	0.3501	0.3577
	0.4259	0.4476	0.4484	0.3895	0.4078	0.3913	0.2489	0.2196	0.2212	0.394	0.4036	0.4024	0.1969	0.2029	0.1976	0.1453	0.1447	0.1451	0.1382	0.1534	0.1526	0.1456	0.1516	0.1442	0.1527	0.1594	0.1563	0.2938	0.3215	0.3092	0.1476	0.1424	0.1594	0.1414	0.1579	0.1414	0.1601	0.1388	0.1429	0.3394	0.3506	0.3609
	0.4251	0.4517	0.4499	0.3817	0.4075	0.3913	0.2462	0.2166	0.2241	0.3932	0.4025	0.4019	0.1949	0.2007	0.2013	0.1454	0.1444	0.1451	0.1382	0.1533	0.1527	0.1454	0.1515	0.1437	0.1526	0.1598	0.1575	0.2931	0.3185	0.3132	0.1476	0.1429	0.1603	0.1416	0.1583	0.1419	0.1605	0.1396	0.1441	0.3397	0.3505	0.362
	0.4252	0.4476	0.4464	0.386	0.407	0.3905	0.245	0.2149	0.2153	0.3933	0.4012	0.4014	0.1941	0.1984	0.193	0.1453	0.1446	0.145	0.138	0.1536	0.1527	0.1458	0.1519	0.1438	0.1552	0.1594	0.1564	0.2931	0.3147	0.308	0.1478	0.1429	0.1615	0.1415	0.158	0.1415	0.1605	0.1448	0.1426	0.3399	0.3498	0.3602
	0.4263	0.4478	0.4468	0.3813	0.4061	0.3898	0.2427	0.2132	0.2132	0.3922	0.3999	0.4008	0.1903	0.1959	0.1909	0.1454	0.1443	0.1451	0.1382	0.1535	0.1529	0.1454	0.1517	0.1434	0.1528	0.1577	0.156	0.2922	0.3149	0.3073	0.1475	0.1428	0.1551	0.1413	0.1576	0.1414	0.1601	0.1388	0.1425	0.3395	0.35	0.3589
	0.4256	0.4473	0.4515	0.3782	0.4055	0.3891	0.2406	0.2108	0.2113	0.3917	0.3996	0.4005	0.188	0.1939	0.1881	0.1452	0.1444	0.145	0.1379	0.1534	0.1524	0.1453	0.1514	0.1435	0.1525	0.176	0.1562	0.2921	0.3132	0.3076	0.1478	0.1428	0.1564	0.1415	0.158	0.1424	0.1604	0.1388	0.1427	0.3404	0.35	0.3576
	0.4256	0.4472	0.4462	0.3936	0.4047	0.3883	0.2399	0.2083	0.2091	0.3915	0.4007	0.3998	0.1853	0.1915	0.1859	0.145	0.1442	0.1446	0.1376	0.1531	0.1524	0.1454	0.1513	0.1433	0.1524	0.1576	0.1566	0.2916	0.3166	0.3063	0.1476	0.1427	0.1545	0.1417	0.1583	0.1419	0.1605	0.139	0.1427	0.3395	0.35	0.3576
	0.4248	0.4469	0.4462	0.3768	0.4043	0.3878	0.2365	0.2064	0.2071	0.3914	0.4014	0.3994	0.1831	0.1893	0.1838	0.145	0.1443	0.1449	0.1377	0.1529	0.1525	0.1455	0.1516	0.1436	0.1527	0.1573	0.1561	0.2909	0.3127	0.3098	0.1477	0.1427	0.1585	0.1412	0.1578	0.1421	0.1601	0.1391	0.1447	0.3396	0.3492	0.3598
	0.4246	0.4472	0.4476	0.3847	0.4037	0.3869	0.2344	0.2055	0.2045	0.3908	0.3972	0.3984	0.1809	0.1869	0.1813	0.1448	0.144	0.1448	0.1377	0.1528	0.1527	0.1453	0.1511	0.1436	0.1531	0.1637	0.1561	0.2909	0.313	0.3058	0.1483	0.1426	0.1565	0.1417	0.1582	0.1426	0.1621	0.1435	0.1438	0.3392	0.35	0.358
	0.425	0.4468	0.4461	0.3728	0.4029	0.3862	0.2323	0.2022	0.2027	0.3903	0.3991	0.3988	0.1788	0.1846	0.1791	0.1449	0.1443	0.1445	0.1379	0.1532	0.1523	0.1452	0.1513	0.1436	0.1525	0.1614	0.1565	0.2902	0.3137	0.3109	0.1478	0.1428	0.1668	0.1417	0.1579	0.1419	0.1606	0.1392	0.1481	0.3392	0.3496	0.3615
	0.4247	0.4468	0.446	0.3844	0.4027	0.3866	0.2303	0.2005	0.2009	0.39	0.3967	0.3985	0.1765	0.1825	0.177	0.1455	0.1443	0.1447	0.1378	0.1532	0.1534	0.1453	0.1514	0.1438	0.1528	0.1596	0.1561	0.2896	0.3113	0.3066	0.1476	0.1428	0.157	0.1412	0.1576	0.1416	0.1609	0.139	0.1674	0.3512	0.3496	0.3578
	0.4245	0.4508	0.4457	0.3787	0.4023	0.3859	0.2283	0.1982	0.1987	0.3894	0.3962	0.3976	0.1739	0.18	0.1744	0.1452	0.1445	0.1444	0.1375	0.153	0.1628	0.1453	0.1515	0.1436	0.1526	0.1575	0.156	0.2889	0.318	0.3035	0.1477	0.1428	0.1599	0.1415	0.1579	0.1414	0.1605	0.1391	0.198	0.3387	0.349	0.3573
	0.4244	0.4468	0.4493	0.3874	0.4014	0.3851	0.2266	0.1975	0.1967	0.3893	0.3975	0.3973	0.1717	0.1779	0.1724	0.1452	0.1443	0.1446	0.1377	0.153	0.1527	0.1455	0.1513	0.1435	0.1531	0.1572	0.1559	0.2892	0.31	0.3033	0.1474	0.1425	0.1604	0.1414	0.1578	0.1423	0.1606	0.139	0.1423	0.3387	0.3531	0.3575
	0.4242	0.4484	0.446	0.3749	0.4009	0.3845	0.2244	0.1944	0.1947	0.3882	0.4041	0.3967	0.173	0.1754	0.1699	0.1448	0.1441	0.1443	0.1377	0.153	0.1522	0.1453	0.1514	0.1431	0.1523	0.1583	0.1558	0.288	0.3115	0.3033	0.1477	0.1428	0.1582	0.1414	0.1577	0.1416	0.1618	0.1389	0.2186	0.3386	0.3493	0.3605
	0.4245	0.4468	0.4495	0.3842	0.4005	0.3842	0.2223	0.1923	0.193	0.388	0.3957	0.3972	0.1673	0.1738	0.1678	0.1449	0.144	0.1446	0.1379	0.1531	0.1525	0.1452	0.1513	0.1439	0.1527	0.1611	0.156	0.2879	0.316	0.303	0.1478	0.1428	0.157	0.142	0.1581	0.1423	0.1603	0.1387	0.1491	0.3389	0.3494	0.3651
	0.4242	0.447	0.445	0.395	0.3994	0.3844	0.2203	0.19	0.1908	0.3876	0.3979	0.3962	0.1649	0.1712	0.1658	0.1451	0.1441	0.1444	0.1377	0.153	0.1531	0.1453	0.1514	0.1431	0.1526	0.1685	0.156	0.2873	0.3087	0.3066	0.1479	0.1426	0.16	0.1417	0.1583	0.1415	0.1606	0.1412	0.1444	0.3387	0.3495	0.3633
	0.4242	0.4464	0.4454	0.3861	0.3995	0.3832	0.2184	0.1899	0.1887	0.3867	0.3947	0.3955	0.1628	0.1689	0.1635	0.1451	0.1439	0.1444	0.1376	0.153	0.1522	0.1455	0.1515	0.1431	0.1524	0.1577	0.1556	0.2871	0.3086	0.3039	0.1475	0.1428	0.16	0.1413	0.158	0.1426	0.1606	0.1387	0.1428	0.3428	0.349	0.3646
	0.4241	0.4464	0.4458	0.3877	0.3987	0.3822	0.2159	0.1864	0.1862	0.3867	0.3955	0.3948	0.1608	0.1667	0.1612	0.1449	0.1442	0.1446	0.1376	0.1532	0.152	0.1452	0.1512	0.1432	0.1525	0.1578	0.1562	0.2863	0.3075	0.3026	0.1475	0.1426	0.1569	0.1413	0.1581	0.1417	0.1602	0.1393	0.2103	0.3465	0.3493	0.3567

## Sheet: Data for Fig S15
	No PfkA			dsixA-1			dsixA-1 + SixA WT			dsixA-1 + SixA H8A			dsixA-2			dsixA-2 + SixA WT			dsixA-2 + SixA H8A			dsixA-3			dsixA-3 + SixA WT			dsixA-3 + SixA H8A									dptsHI dsixA + SixA
	0.3615	0.3452	0.3511	0.361	0.3502	0.3472	0.3537	0.3435	0.3404	0.3533	0.3458	0.3474	0.3548	0.3363	0.3358	0.3506	0.3434	0.3352	0.3513	0.3464	0.3414	0.3707	0.3374	0.3303	0.3358	0.3512	0.3363	0.3495	0.3498	0.3391
	0.3612	0.3444	0.3498	0.3612	0.3484	0.345	0.3524	0.3399	0.3376	0.354	0.3454	0.3467	0.3553	0.3389	0.3364	0.3489	0.3418	0.3315	0.3509	0.346	0.3397	0.3689	0.337	0.3281	0.3346	0.3469	0.3347	0.3507	0.3498	0.3392
	0.3597	0.3427	0.3491	0.3582	0.3471	0.3441	0.3475	0.3338	0.333	0.3523	0.3461	0.3444	0.3543	0.3383	0.3352	0.344	0.3384	0.3275	0.3495	0.3458	0.3384	0.367	0.3357	0.3277	0.3281	0.3419	0.3259	0.3485	0.348	0.3369
	0.3584	0.3405	0.3477	0.3569	0.3458	0.3429	0.3428	0.3304	0.3279	0.3505	0.3424	0.3434	0.3522	0.3354	0.3338	0.3398	0.3339	0.321	0.3473	0.3429	0.3352	0.3657	0.334	0.3277	0.3234	0.3362	0.3203	0.3467	0.3465	0.3353
	0.355	0.3392	0.3462	0.3556	0.3436	0.3415	0.3385	0.3225	0.3236	0.3491	0.3424	0.3412	0.3502	0.3349	0.3315	0.3356	0.3301	0.3157	0.3458	0.3417	0.3349	0.3634	0.3328	0.3231	0.3192	0.3313	0.3153	0.345	0.3449	0.3337
	0.3548	0.3387	0.3456	0.3545	0.3425	0.342	0.3348	0.3168	0.3198	0.348	0.3414	0.3406	0.3499	0.3344	0.3301	0.3325	0.3268	0.3124	0.3456	0.3414	0.3342	0.363	0.332	0.3228	0.3176	0.3271	0.3105	0.3437	0.3443	0.3317
	0.3538	0.3369	0.345	0.3531	0.3417	0.3414	0.3315	0.3123	0.3145	0.3468	0.3396	0.3401	0.3483	0.3328	0.3288	0.3293	0.3236	0.3072	0.3436	0.3398	0.3322	0.3613	0.331	0.3221	0.3124	0.3215	0.3071	0.3428	0.3432	0.3315
	0.3529	0.3364	0.3444	0.3523	0.341	0.3396	0.3276	0.3076	0.3108	0.3461	0.3383	0.339	0.3475	0.3322	0.3279	0.3259	0.3202	0.3024	0.3432	0.3384	0.3318	0.361	0.33	0.322	0.3087	0.3195	0.3014	0.3418	0.3419	0.3304
	0.3528	0.3351	0.3433	0.3512	0.3398	0.3386	0.3236	0.3025	0.3062	0.3448	0.3375	0.3388	0.346	0.3317	0.3267	0.3223	0.3165	0.2976	0.3415	0.3371	0.3307	0.3598	0.329	0.3196	0.3047	0.3125	0.2967	0.3409	0.3408	0.33
	0.3508	0.3348	0.3426	0.3501	0.3395	0.3378	0.3201	0.2981	0.3021	0.3444	0.3367	0.3375	0.3457	0.3311	0.3268	0.3193	0.3142	0.2951	0.3414	0.3382	0.3305	0.3585	0.3288	0.3194	0.3012	0.3081	0.2924	0.3396	0.3409	0.328
	0.3507	0.3339	0.3418	0.3493	0.3383	0.3366	0.3162	0.2936	0.2982	0.3434	0.3362	0.3367	0.3448	0.3299	0.326	0.316	0.3103	0.2901	0.3403	0.337	0.3298	0.3574	0.3275	0.3179	0.2974	0.3035	0.2902	0.3384	0.3396	0.3272
	0.3485	0.3334	0.3412	0.3488	0.3379	0.3366	0.3127	0.2882	0.2945	0.3428	0.3355	0.3363	0.3448	0.3291	0.3251	0.3128	0.3077	0.2856	0.3396	0.336	0.3289	0.3562	0.3268	0.3188	0.2942	0.299	0.2838	0.3379	0.3388	0.3266
	0.3479	0.333	0.3408	0.3487	0.3372	0.3358	0.3094	0.2836	0.2905	0.3417	0.3349	0.3358	0.3433	0.329	0.3241	0.3095	0.3048	0.2816	0.3381	0.3352	0.328	0.356	0.3263	0.318	0.2906	0.2948	0.2796	0.3379	0.3382	0.327
	0.3465	0.332	0.3393	0.3469	0.3365	0.3355	0.3056	0.2787	0.2859	0.341	0.3341	0.3335	0.3422	0.3278	0.3236	0.3114	0.3012	0.2768	0.338	0.3342	0.3282	0.3548	0.3254	0.3165	0.287	0.2901	0.2754	0.336	0.337	0.3251
	0.346	0.3314	0.3392	0.3463	0.336	0.3357	0.302	0.2743	0.2817	0.3416	0.3347	0.334	0.3416	0.3274	0.3238	0.3037	0.298	0.2728	0.3368	0.3347	0.3266	0.3537	0.3247	0.3159	0.2842	0.2853	0.2716	0.3349	0.3369	0.3246
	0.3451	0.3304	0.3388	0.3456	0.3347	0.3343	0.2984	0.2709	0.2778	0.3396	0.3327	0.3364	0.3402	0.3265	0.3235	0.3002	0.2947	0.2686	0.3357	0.3325	0.3326	0.354	0.3237	0.3152	0.2797	0.2812	0.2661	0.3349	0.3361	0.3241
	0.3444	0.3342	0.3375	0.345	0.3342	0.3336	0.2951	0.265	0.2739	0.3391	0.332	0.333	0.3406	0.3266	0.3212	0.298	0.2918	0.2645	0.3353	0.3319	0.3262	0.3527	0.3234	0.3138	0.2763	0.2771	0.2622	0.3344	0.3357	0.3239
	0.3438	0.3298	0.3377	0.344	0.3344	0.3331	0.2915	0.2605	0.2699	0.338	0.3315	0.334	0.3404	0.3262	0.3212	0.2945	0.2895	0.2609	0.3351	0.3319	0.3252	0.3523	0.3229	0.3148	0.2732	0.2727	0.2581	0.3337	0.3352	0.3227
	0.343	0.3291	0.3366	0.3437	0.3337	0.3329	0.2882	0.2567	0.2662	0.3377	0.3308	0.3317	0.3381	0.325	0.3204	0.2913	0.2859	0.2567	0.3339	0.3312	0.3247	0.3511	0.3219	0.3133	0.2695	0.2685	0.254	0.3332	0.3339	0.3227
	0.3424	0.3347	0.3369	0.3429	0.3323	0.3321	0.2846	0.2525	0.2618	0.3372	0.3301	0.3306	0.3372	0.3244	0.3197	0.2887	0.2828	0.2524	0.3332	0.3302	0.3269	0.3503	0.3214	0.3135	0.2662	0.2638	0.2499	0.3323	0.3338	0.3221
	0.3413	0.3279	0.3363	0.3421	0.3319	0.3312	0.2811	0.2467	0.2573	0.3369	0.3292	0.3311	0.3372	0.3236	0.3193	0.285	0.2805	0.2483	0.3326	0.3305	0.3234	0.3495	0.3205	0.3132	0.263	0.2592	0.2455	0.3313	0.3331	0.3215
	0.3414	0.3273	0.3352	0.3411	0.3335	0.3308	0.2777	0.243	0.253	0.3359	0.3284	0.3298	0.336	0.3231	0.3189	0.2822	0.2769	0.2439	0.3316	0.3291	0.323	0.349	0.3204	0.3146	0.2593	0.255	0.2416	0.33	0.3325	0.3208
	0.3405	0.3268	0.3352	0.3413	0.3312	0.3307	0.2746	0.2386	0.2498	0.3358	0.3284	0.3293	0.3358	0.3227	0.3182	0.2808	0.2742	0.2401	0.3309	0.3292	0.3246	0.3483	0.3199	0.3125	0.2563	0.2509	0.2373	0.33	0.3319	0.3203
	0.3395	0.3264	0.3346	0.3398	0.3304	0.3299	0.2711	0.2335	0.246	0.3353	0.3286	0.3288	0.3354	0.3222	0.3183	0.2772	0.2712	0.236	0.3309	0.3282	0.3243	0.348	0.3189	0.3162	0.2527	0.2496	0.2338	0.3291	0.3315	0.3209
	0.3387	0.3268	0.3344	0.3397	0.33	0.3293	0.2681	0.2293	0.2419	0.3348	0.3264	0.3289	0.3345	0.3218	0.3172	0.2734	0.2683	0.2319	0.3298	0.3277	0.3221	0.3472	0.3185	0.3184	0.2493	0.242	0.229	0.3284	0.3305	0.3189
	0.3383	0.3257	0.3342	0.3392	0.3298	0.335	0.2647	0.2251	0.2381	0.334	0.3269	0.3276	0.3341	0.3213	0.3188	0.2704	0.2656	0.2284	0.329	0.3275	0.3256	0.3468	0.3189	0.3096	0.2459	0.2382	0.2254	0.3285	0.3307	0.3191
	0.3373	0.3247	0.3342	0.3381	0.329	0.3287	0.2612	0.2208	0.2341	0.333	0.3256	0.3267	0.3334	0.3207	0.3173	0.2678	0.2627	0.2241	0.3287	0.327	0.3204	0.3459	0.3174	0.3082	0.2423	0.234	0.2209	0.3272	0.3302	0.3179
	0.3368	0.3241	0.3334	0.3377	0.3285	0.3284	0.2581	0.2163	0.2304	0.333	0.3255	0.327	0.3322	0.3199	0.3156	0.2644	0.2599	0.22	0.3275	0.327	0.3204	0.3449	0.3171	0.3079	0.2392	0.2298	0.2173	0.3266	0.3299	0.3176
	0.3365	0.3238	0.3335	0.3373	0.3279	0.3276	0.2547	0.2124	0.2262	0.3321	0.3251	0.3261	0.3315	0.3199	0.3187	0.2619	0.2569	0.2162	0.3272	0.3262	0.3204	0.3448	0.3162	0.307	0.236	0.2256	0.2133	0.3261	0.3291	0.3177
	0.3358	0.3231	0.3325	0.3364	0.3272	0.3281	0.2512	0.2077	0.2224	0.3317	0.3249	0.3254	0.3311	0.3193	0.3149	0.2624	0.2539	0.2126	0.3264	0.3254	0.3368	0.3437	0.3158	0.3127	0.2325	0.2215	0.2089	0.326	0.3282	0.3171
	0.3351	0.3232	0.3319	0.3356	0.3267	0.3267	0.2481	0.2035	0.2187	0.3303	0.3235	0.3247	0.3309	0.319	0.3142	0.256	0.2511	0.2088	0.326	0.3249	0.3183	0.3434	0.3152	0.3056	0.2295	0.2172	0.2051	0.3246	0.3281	0.316
	0.3352	0.3226	0.3329	0.3364	0.3271	0.3267	0.2453	0.1988	0.2156	0.3303	0.3236	0.3245	0.3301	0.3188	0.3147	0.2535	0.2479	0.2047	0.3253	0.3242	0.3188	0.3431	0.3152	0.3061	0.2261	0.2134	0.2013	0.3247	0.3281	0.3159
	0.3341	0.322	0.3309	0.3351	0.326	0.3265	0.242	0.1948	0.2107	0.3298	0.3228	0.3247	0.3294	0.3184	0.3135	0.2503	0.2454	0.2008	0.3251	0.3236	0.3182	0.3424	0.3144	0.3055	0.2227	0.209	0.1973	0.3241	0.3273	0.3158
	0.3333	0.3236	0.3309	0.3342	0.3262	0.326	0.2385	0.1907	0.2071	0.3299	0.3229	0.3234	0.3285	0.3177	0.315	0.2478	0.2425	0.1976	0.3244	0.3234	0.317	0.3417	0.3141	0.3054	0.2194	0.2053	0.1935	0.3237	0.3271	0.3151
	0.3324	0.3214	0.3305	0.3334	0.3253	0.3251	0.2356	0.1866	0.203	0.3291	0.3215	0.3235	0.3278	0.3172	0.3121	0.2455	0.2398	0.1928	0.324	0.3233	0.3167	0.3408	0.313	0.3048	0.2162	0.2009	0.1891	0.3222	0.3262	0.314
	0.331	0.3206	0.3299	0.3327	0.3248	0.3244	0.2317	0.1819	0.1987	0.3284	0.3209	0.3316	0.3274	0.3166	0.3113	0.2419	0.2365	0.1887	0.3228	0.3225	0.3161	0.3402	0.3127	0.3067	0.2128	0.1966	0.1863	0.3218	0.3257	0.3135
	0.332	0.3206	0.3301	0.334	0.3244	0.3244	0.2294	0.1778	0.1956	0.3281	0.3213	0.3231	0.3271	0.316	0.3108	0.2394	0.2338	0.1855	0.3218	0.3223	0.3157	0.3399	0.3125	0.3038	0.2096	0.1931	0.1816	0.3218	0.3254	0.3134
	0.3303	0.32	0.3289	0.3321	0.3239	0.3238	0.226	0.1739	0.1917	0.3274	0.3204	0.3215	0.3261	0.3156	0.3118	0.2369	0.2313	0.1822	0.3218	0.3218	0.3154	0.339	0.3118	0.304	0.2065	0.1888	0.178	0.3216	0.3248	0.3129
	0.3313	0.3196	0.3291	0.3312	0.3236	0.3236	0.2229	0.1696	0.1877	0.3272	0.3205	0.323	0.3255	0.3153	0.3104	0.2346	0.2284	0.1776	0.3214	0.3215	0.3151	0.3384	0.3119	0.3039	0.2033	0.185	0.174	0.3199	0.3238	0.3127
	0.3289	0.3191	0.3296	0.3309	0.3231	0.3235	0.2196	0.1657	0.1839	0.3267	0.3195	0.3226	0.3252	0.3146	0.3117	0.231	0.2258	0.1738	0.3209	0.3206	0.3146	0.3382	0.3108	0.3052	0.2003	0.1806	0.1704	0.3196	0.324	0.3122
	0.3288	0.3185	0.3278	0.3301	0.3219	0.3274	0.2165	0.162	0.1799	0.3254	0.3192	0.3199	0.3247	0.3145	0.3116	0.2283	0.2224	0.1703	0.3199	0.3205	0.3158	0.3372	0.3099	0.3036	0.1967	0.1773	0.1665	0.3189	0.324	0.3114
	0.3282	0.3179	0.3276	0.3295	0.322	0.3221	0.2136	0.1581	0.176	0.3257	0.3186	0.3232	0.3237	0.3141	0.3089	0.2275	0.2198	0.1667	0.3194	0.3199	0.3135	0.3367	0.3102	0.3021	0.1939	0.1729	0.1625	0.3189	0.3233	0.3126
	0.3275	0.3179	0.3274	0.3286	0.3217	0.3218	0.2108	0.1536	0.1723	0.3249	0.3185	0.3195	0.3233	0.3135	0.3088	0.2238	0.2171	0.163	0.3186	0.3192	0.3128	0.3361	0.3095	0.3002	0.1901	0.1687	0.1589	0.3178	0.3229	0.3106
	0.3275	0.317	0.3267	0.3284	0.3211	0.3218	0.2075	0.1495	0.1686	0.3239	0.3181	0.3194	0.3225	0.3129	0.3075	0.221	0.2145	0.1592	0.3174	0.3191	0.3124	0.335	0.3087	0.3062	0.1872	0.1654	0.1554	0.3168	0.3221	0.31
	0.3265	0.3166	0.3267	0.3281	0.3203	0.3213	0.205	0.1459	0.1648	0.3242	0.3173	0.3185	0.3221	0.3128	0.3072	0.2182	0.2116	0.1567	0.3175	0.3185	0.3123	0.3348	0.3082	0.2995	0.1842	0.1615	0.1516	0.317	0.3219	0.3095
	0.3252	0.3171	0.3265	0.3275	0.3221	0.3212	0.2018	0.1445	0.1609	0.3238	0.3171	0.318	0.3213	0.3122	0.3088	0.2157	0.2088	0.1577	0.317	0.3181	0.3127	0.3339	0.3078	0.2991	0.1807	0.158	0.1482	0.3156	0.3215	0.3089
	0.3248	0.3161	0.3255	0.3274	0.3197	0.3205	0.1989	0.1383	0.1573	0.3226	0.3165	0.3176	0.3207	0.3116	0.306	0.2136	0.2061	0.1489	0.3165	0.318	0.311	0.3334	0.3072	0.2994	0.1777	0.1538	0.1442	0.3159	0.3212	0.3087
	0.3245	0.3155	0.3258	0.3284	0.3198	0.3202	0.1959	0.1341	0.1536	0.3222	0.3162	0.3165	0.3204	0.3112	0.3061	0.2106	0.2036	0.1453	0.3157	0.3181	0.3105	0.3331	0.3085	0.303	0.1745	0.1502	0.1416	0.3154	0.321	0.3088
	0.3247	0.3148	0.3252	0.3256	0.3191	0.3204	0.1936	0.1308	0.1501	0.3215	0.3154	0.3168	0.3195	0.3108	0.3053	0.2079	0.2008	0.1415	0.3159	0.3167	0.3102	0.3321	0.3064	0.2986	0.1717	0.1462	0.1374	0.3141	0.3204	0.3077
	0.3228	0.3142	0.3247	0.3253	0.3182	0.3193	0.1897	0.1269	0.1459	0.3213	0.3149	0.3159	0.3185	0.3104	0.3053	0.2049	0.1978	0.1381	0.3143	0.3168	0.3095	0.3314	0.3066	0.2975	0.1679	0.1423	0.1335	0.3139	0.3193	0.3072
	0.3228	0.3135	0.3244	0.3249	0.318	0.3193	0.1872	0.1233	0.1423	0.3205	0.3144	0.3158	0.3184	0.3101	0.3047	0.2026	0.1953	0.1351	0.3138	0.3157	0.3094	0.3307	0.3051	0.2969	0.1651	0.1393	0.1304	0.3133	0.3193	0.3069
	0.3218	0.3136	0.3242	0.3241	0.3172	0.3198	0.1845	0.12	0.1387	0.3202	0.3143	0.3152	0.3183	0.3096	0.3038	0.2002	0.1927	0.1316	0.3136	0.3155	0.3088	0.3304	0.3053	0.2966	0.1622	0.1355	0.127	0.3128	0.3191	0.3068
	0.3215	0.3131	0.3235	0.3235	0.3173	0.3185	0.1818	0.1162	0.1352	0.3203	0.3137	0.3223	0.3171	0.3091	0.3032	0.1981	0.1901	0.1279	0.3126	0.3154	0.3091	0.33	0.3049	0.2951	0.159	0.1316	0.124	0.3121	0.3185	0.306
	0.3211	0.3128	0.3234	0.3237	0.3168	0.3176	0.1789	0.1134	0.1316	0.3202	0.3132	0.3147	0.3168	0.3091	0.3033	0.1952	0.1873	0.1247	0.3127	0.3147	0.3092	0.33	0.304	0.2961	0.1559	0.1283	0.1203	0.312	0.3181	0.3067
	0.3204	0.3128	0.3235	0.3236	0.3164	0.3175	0.1763	0.1108	0.1281	0.3195	0.3128	0.3136	0.3162	0.3088	0.3041	0.1932	0.1851	0.1217	0.3117	0.3146	0.3082	0.3286	0.304	0.2952	0.1529	0.1249	0.1183	0.3113	0.3177	0.3052
	0.3199	0.3119	0.3228	0.3221	0.3157	0.3167	0.1736	0.1087	0.1241	0.3186	0.3123	0.3132	0.3157	0.3079	0.3025	0.1916	0.1819	0.1181	0.3112	0.3136	0.3075	0.3278	0.3033	0.2943	0.1535	0.1229	0.1142	0.3106	0.3173	0.306
	0.3193	0.3118	0.3224	0.3226	0.3157	0.3191	0.171	0.1092	0.1207	0.3178	0.3118	0.3133	0.315	0.3075	0.3021	0.1889	0.1796	0.116	0.3105	0.3135	0.3074	0.3275	0.3029	0.2967	0.1472	0.118	0.1114	0.31	0.3171	0.3045
	0.3187	0.3112	0.3222	0.3211	0.3155	0.3161	0.1682	0.1063	0.1174	0.3183	0.3115	0.3125	0.3143	0.3073	0.3015	0.1861	0.1769	0.1123	0.3106	0.3134	0.3064	0.3275	0.3024	0.2937	0.144	0.1146	0.1086	0.3098	0.3166	0.3047
	0.3183	0.3109	0.3228	0.3206	0.3144	0.316	0.1655	0.1058	0.1137	0.317	0.3113	0.3117	0.3137	0.3071	0.3034	0.1839	0.1742	0.1096	0.3096	0.3127	0.3067	0.3262	0.3016	0.2926	0.1407	0.1116	0.1069	0.3087	0.3164	0.3032
	0.3173	0.3104	0.3214	0.3204	0.3146	0.3158	0.1628	0.1054	0.1106	0.3169	0.311	0.3116	0.3132	0.3063	0.3015	0.183	0.1716	0.107	0.3091	0.3148	0.3058	0.3264	0.3014	0.2935	0.1379	0.1088	0.1052	0.3088	0.3158	0.303
	0.317	0.3098	0.3212	0.3196	0.3136	0.3149	0.1603	0.1053	0.1076	0.3162	0.3111	0.3115	0.3119	0.3062	0.3006	0.1793	0.169	0.1042	0.309	0.3118	0.305	0.3258	0.3008	0.294	0.1352	0.1077	0.1042	0.3081	0.3154	0.3027
	0.3161	0.3094	0.321	0.319	0.3132	0.3156	0.1575	0.1052	0.1046	0.3157	0.3101	0.311	0.3115	0.3052	0.3017	0.1768	0.1666	0.1025	0.3075	0.3137	0.3062	0.325	0.3002	0.2919	0.1319	0.1042	0.1039	0.3073	0.315	0.3024
	0.3156	0.3096	0.3223	0.3185	0.313	0.3147	0.1552	0.105	0.1022	0.3154	0.3098	0.3113	0.3115	0.3053	0.3003	0.1766	0.164	0.1014	0.3071	0.3107	0.3045	0.3245	0.3002	0.293	0.1291	0.1038	0.1033	0.3073	0.3148	0.302
	0.3148	0.3214	0.3206	0.3176	0.3126	0.3145	0.1526	0.1046	0.1003	0.3142	0.3089	0.3098	0.3107	0.3048	0.2985	0.1726	0.1613	0.1004	0.3068	0.3121	0.304	0.3233	0.2995	0.2908	0.1262	0.1018	0.1028	0.3061	0.3144	0.3011
	0.3143	0.3088	0.3202	0.3172	0.3117	0.3134	0.1502	0.1047	0.0994	0.3144	0.3088	0.3093	0.3098	0.3042	0.2999	0.1705	0.1588	0.0997	0.3059	0.3109	0.3035	0.3231	0.2991	0.2903	0.1235	0.1016	0.1046	0.3057	0.3136	0.3012
	0.3137	0.3076	0.3199	0.3169	0.3113	0.3134	0.148	0.1044	0.0988	0.3142	0.3087	0.329	0.3096	0.3037	0.2995	0.1681	0.1563	0.0995	0.3056	0.3098	0.3034	0.3228	0.2985	0.2901	0.1208	0.101	0.1028	0.3054	0.3141	0.3009
	0.3137	0.3075	0.3193	0.3172	0.3107	0.3133	0.1454	0.1045	0.098	0.3131	0.3076	0.3087	0.3088	0.3033	0.2972	0.1673	0.154	0.0989	0.3049	0.3097	0.3029	0.3215	0.2981	0.2953	0.1179	0.1005	0.1025	0.3045	0.313	0.3004
	0.3127	0.3071	0.3189	0.3155	0.3109	0.3143	0.1428	0.1045	0.0979	0.3129	0.3075	0.3116	0.3084	0.3032	0.2967	0.164	0.1514	0.0987	0.3045	0.3089	0.3082	0.3217	0.2982	0.2894	0.1151	0.1007	0.1025	0.3043	0.3129	0.3
	0.3121	0.3125	0.3182	0.3151	0.31	0.3122	0.1404	0.1042	0.0977	0.3122	0.307	0.3073	0.3076	0.3028	0.2977	0.1617	0.1491	0.0986	0.3036	0.3083	0.3023	0.3212	0.2972	0.2899	0.1123	0.1007	0.1023	0.3035	0.3122	0.2992
	0.3123	0.306	0.3181	0.3148	0.3097	0.3117	0.1382	0.1043	0.0977	0.3124	0.3065	0.3076	0.3093	0.3019	0.2975	0.1597	0.1468	0.0998	0.3035	0.308	0.3033	0.3205	0.2968	0.2883	0.11	0.1003	0.1023	0.3029	0.3121	0.299
	0.3107	0.3055	0.3173	0.3143	0.3092	0.3118	0.1356	0.1043	0.0977	0.3113	0.3063	0.3104	0.3068	0.3015	0.295	0.1578	0.1441	0.0984	0.3026	0.3074	0.3013	0.3196	0.2964	0.2882	0.1077	0.1003	0.102	0.3024	0.3113	0.2988
	0.3106	0.3056	0.3175	0.314	0.3091	0.3114	0.1336	0.1045	0.0976	0.3112	0.306	0.3064	0.3065	0.3016	0.296	0.1556	0.1417	0.0986	0.3025	0.3076	0.3012	0.319	0.2968	0.2915	0.1058	0.1017	0.1022	0.302	0.3112	0.2981
	0.3097	0.3049	0.3174	0.3137	0.309	0.3122	0.131	0.1074	0.0977	0.3104	0.3052	0.3074	0.3056	0.3008	0.2949	0.1533	0.1394	0.0985	0.3017	0.3077	0.3003	0.3188	0.2957	0.2928	0.1041	0.1002	0.103	0.3016	0.3108	0.2979
	0.3091	0.3044	0.3165	0.313	0.3082	0.31	0.1293	0.1043	0.0975	0.3105	0.3049	0.3056	0.3056	0.3005	0.2958	0.1515	0.1369	0.0985	0.3013	0.3064	0.3	0.318	0.2951	0.2858	0.1028	0.1002	0.1022	0.3008	0.3102	0.297
	0.3088	0.306	0.3165	0.3127	0.3078	0.3098	0.1266	0.1041	0.0977	0.3097	0.3061	0.3185	0.305	0.2998	0.294	0.1494	0.1346	0.0977	0.3002	0.3061	0.2996	0.3175	0.2948	0.2879	0.1032	0.1001	0.1021	0.3	0.31	0.2969
	0.3082	0.3035	0.3159	0.3118	0.3071	0.3101	0.1244	0.1042	0.097	0.3092	0.304	0.3043	0.3042	0.3	0.2934	0.1475	0.132	0.0981	0.2998	0.3054	0.2991	0.3166	0.2942	0.2872	0.1015	0.0998	0.1018	0.3001	0.309	0.2963
	0.3077	0.3031	0.3158	0.3118	0.3066	0.3092	0.122	0.104	0.0973	0.3088	0.3033	0.3196	0.3037	0.299	0.2931	0.1456	0.1297	0.0982	0.2995	0.3053	0.299	0.3164	0.2938	0.2849	0.1012	0.1004	0.1021	0.2991	0.309	0.2959
	0.3075	0.3027	0.3154	0.3113	0.3064	0.3092	0.1199	0.1039	0.0973	0.3101	0.303	0.3295	0.3028	0.299	0.2954	0.144	0.1275	0.0982	0.2996	0.3049	0.3025	0.3162	0.2932	0.2849	0.1012	0.0999	0.1018	0.2992	0.309	0.2956
	0.3064	0.3029	0.3152	0.3108	0.3063	0.309	0.1181	0.1047	0.0974	0.3078	0.3028	0.3046	0.3025	0.2984	0.2921	0.1433	0.1254	0.0982	0.2988	0.3048	0.2983	0.3158	0.293	0.2856	0.101	0.1002	0.102	0.2998	0.3086	0.2956
	0.3072	0.3022	0.3149	0.3099	0.3055	0.3087	0.116	0.1041	0.0972	0.3075	0.3043	0.3031	0.3019	0.2978	0.2938	0.1396	0.1231	0.0982	0.298	0.3042	0.2975	0.316	0.2927	0.284	0.1007	0.1	0.1019	0.2977	0.3083	0.2952
	0.3054	0.3016	0.3142	0.3101	0.3054	0.3111	0.114	0.104	0.0969	0.3069	0.3019	0.3038	0.3015	0.2977	0.2912	0.1385	0.1208	0.0986	0.2975	0.3037	0.2973	0.3145	0.2923	0.2842	0.1006	0.0999	0.1021	0.2975	0.3072	0.2949
	0.3049	0.3011	0.3141	0.3093	0.3049	0.3082	0.1124	0.1044	0.0974	0.3066	0.3014	0.3031	0.3008	0.2976	0.2907	0.136	0.1185	0.0978	0.297	0.3064	0.3009	0.3138	0.2918	0.2828	0.1004	0.0998	0.1018	0.2967	0.307	0.2944
	0.3042	0.3016	0.314	0.3087	0.3046	0.3074	0.1106	0.1039	0.0973	0.3068	0.3013	0.3021	0.301	0.2965	0.291	0.1345	0.1163	0.098	0.2961	0.3027	0.297	0.3133	0.291	0.2821	0.1007	0.0997	0.1018	0.2962	0.3067	0.2936
	0.3034	0.3	0.3128	0.3088	0.3036	0.3069	0.1085	0.1037	0.0971	0.3058	0.3005	0.3014	0.2995	0.2964	0.2898	0.1319	0.1142	0.0982	0.2954	0.3027	0.2958	0.312	0.2902	0.2834	0.1003	0.1003	0.1017	0.2955	0.3058	0.2936
	0.3034	0.3003	0.3142	0.3078	0.3033	0.3065	0.1076	0.1039	0.0969	0.3051	0.3002	0.3012	0.2996	0.2963	0.2895	0.1328	0.1123	0.0979	0.2951	0.3021	0.2956	0.3123	0.2908	0.282	0.1006	0.1009	0.1042	0.2956	0.306	0.293
	0.3021	0.2992	0.3127	0.3082	0.303	0.3058	0.1059	0.104	0.0973	0.3047	0.3001	0.3004	0.2994	0.2957	0.2922	0.1285	0.1102	0.0979	0.2944	0.3017	0.2951	0.3116	0.2899	0.2828	0.1003	0.0998	0.1016	0.2942	0.3057	0.2923
	0.3022	0.2993	0.3125	0.3065	0.3028	0.3058	0.1048	0.1045	0.0972	0.3043	0.303	0.3006	0.2982	0.2953	0.2891	0.1268	0.1087	0.0987	0.2942	0.3012	0.2981	0.3111	0.2896	0.2825	0.1002	0.1004	0.102	0.294	0.3056	0.2926
	0.3015	0.2989	0.3128	0.3063	0.3025	0.3066	0.104	0.1038	0.0969	0.3039	0.2987	0.2996	0.2972	0.2952	0.2881	0.1253	0.1064	0.0978	0.2932	0.3006	0.2952	0.3111	0.2889	0.2792	0.0999	0.0997	0.1015	0.2934	0.305	0.2915
	0.3007	0.2987	0.3121	0.3059	0.3016	0.3085	0.1036	0.1039	0.0978	0.3032	0.2986	0.2992	0.2972	0.2945	0.2889	0.1231	0.1047	0.098	0.2932	0.3004	0.2943	0.3104	0.2885	0.281	0.0999	0.0998	0.102	0.293	0.3044	0.2909
	0.3002	0.298	0.3116	0.3057	0.3015	0.3047	0.1032	0.1038	0.0971	0.3032	0.2981	0.3195	0.2964	0.2941	0.2877	0.1216	0.103	0.0975	0.2928	0.3001	0.2936	0.3101	0.288	0.2785	0.1001	0.0997	0.1019	0.2925	0.3041	0.291
	0.3006	0.3018	0.3114	0.3048	0.3017	0.3049	0.1029	0.1041	0.0971	0.3028	0.2979	0.299	0.2961	0.2941	0.2875	0.1204	0.1019	0.098	0.2919	0.2995	0.2937	0.309	0.2877	0.2787	0.1004	0.1001	0.1019	0.292	0.3034	0.2906
	0.3	0.2972	0.311	0.3042	0.3005	0.3038	0.1024	0.1037	0.0973	0.3019	0.297	0.3197	0.2953	0.2935	0.2867	0.1185	0.1008	0.098	0.2916	0.2995	0.2939	0.3083	0.2869	0.2879	0.1002	0.0999	0.1016	0.2914	0.3033	0.2898
	0.299	0.2971	0.3108	0.3038	0.3001	0.3034	0.1022	0.1041	0.0971	0.3014	0.2973	0.2978	0.2949	0.293	0.2868	0.1166	0.1003	0.0978	0.2912	0.2991	0.2932	0.3079	0.2867	0.2835	0.1003	0.0997	0.1019	0.2913	0.3032	0.2902
	0.2979	0.2971	0.3104	0.3033	0.2998	0.3032	0.1023	0.104	0.0971	0.3012	0.2967	0.2975	0.2944	0.2928	0.2891	0.115	0.0993	0.0979	0.2907	0.2987	0.2926	0.3072	0.2864	0.2777	0.1	0.0998	0.1016	0.2905	0.3027	0.2894
	0.2976	0.2964	0.3099	0.3025	0.2996	0.3033	0.1018	0.1037	0.0981	0.3013	0.2963	0.297	0.2938	0.2919	0.2862	0.1139	0.0987	0.0979	0.2902	0.2985	0.2924	0.3068	0.2858	0.2775	0.1002	0.0998	0.1017	0.2898	0.3025	0.289
	0.2972	0.2961	0.3094	0.3025	0.2989	0.3052	0.1017	0.104	0.0973	0.3003	0.2959	0.2975	0.2931	0.2915	0.2852	0.1123	0.0986	0.0978	0.2893	0.2981	0.2919	0.3059	0.2855	0.2824	0.1	0.0997	0.1018	0.29	0.3018	0.2885
	0.2966	0.2954	0.3092	0.3011	0.2985	0.3021	0.1018	0.104	0.0968	0.3002	0.2955	0.2965	0.2924	0.2912	0.2845	0.111	0.098	0.0977	0.2887	0.2972	0.3082	0.3054	0.285	0.2798	0.1	0.0996	0.1018	0.289	0.3013	0.288
	0.296	0.2952	0.3086	0.3011	0.2981	0.3018	0.1016	0.1037	0.097	0.3004	0.2954	0.2955	0.2928	0.2909	0.2843	0.1101	0.0982	0.098	0.2885	0.2968	0.2906	0.3051	0.2846	0.2765	0.1002	0.0995	0.1016	0.2883	0.3012	0.2881
	0.2953	0.2965	0.3087	0.3009	0.2977	0.3017	0.1016	0.1039	0.0972	0.2994	0.2945	0.2956	0.2922	0.2907	0.2842	0.1092	0.0979	0.0981	0.2878	0.2966	0.2905	0.3046	0.2846	0.281	0.1001	0.0997	0.1017	0.288	0.3011	0.2872
	0.2949	0.309	0.3085	0.3002	0.2974	0.3015	0.1019	0.1037	0.0968	0.2989	0.2943	0.3095	0.2915	0.2901	0.2852	0.1082	0.0978	0.0983	0.2871	0.2962	0.2898	0.3042	0.284	0.2772	0.1003	0.1001	0.1015	0.2874	0.3004	0.2871
	0.2944	0.2942	0.3077	0.2999	0.2969	0.3005	0.1014	0.1037	0.0972	0.2981	0.294	0.2943	0.2911	0.29	0.283	0.1075	0.0976	0.0976	0.2869	0.296	0.2896	0.3036	0.2837	0.2749	0.1002	0.1001	0.102	0.2871	0.3	0.2875
	0.2938	0.2932	0.3071	0.2992	0.2964	0.3006	0.1012	0.1035	0.097	0.2981	0.2936	0.2946	0.29	0.2893	0.2829	0.1071	0.0975	0.0984	0.2864	0.2951	0.2893	0.3028	0.2835	0.2747	0.0999	0.0997	0.1014	0.2883	0.2997	0.286
	0.2932	0.2932	0.3073	0.2988	0.2959	0.3003	0.1013	0.1043	0.0972	0.2969	0.2935	0.2939	0.2897	0.2886	0.2832	0.1065	0.0972	0.0977	0.2856	0.2946	0.2889	0.3027	0.282	0.2737	0.1	0.0996	0.1013	0.2861	0.299	0.2873
	0.293	0.2926	0.3072	0.2982	0.2966	0.2999	0.1017	0.1037	0.0969	0.2969	0.2927	0.2936	0.2893	0.2886	0.2821	0.1062	0.0978	0.0977	0.2853	0.2947	0.2885	0.3024	0.2824	0.2786	0.1004	0.0997	0.1016	0.2855	0.2988	0.2855
	0.2925	0.2925	0.3065	0.2978	0.2952	0.299	0.1011	0.1036	0.0971	0.2965	0.2926	0.2929	0.289	0.2877	0.2842	0.1062	0.0978	0.0978	0.2848	0.2939	0.2887	0.3016	0.2826	0.2757	0.0999	0.1018	0.1045	0.285	0.2986	0.2849
	0.2919	0.2921	0.3068	0.2975	0.2948	0.2993	0.1013	0.104	0.097	0.2965	0.2918	0.2933	0.2881	0.2881	0.2812	0.1058	0.0973	0.0977	0.2842	0.2936	0.288	0.3006	0.2812	0.2726	0.1001	0.0997	0.103	0.2843	0.298	0.2846
	0.291	0.2915	0.3056	0.2966	0.2945	0.2984	0.1013	0.1039	0.0971	0.2959	0.2916	0.2929	0.2878	0.2875	0.2813	0.1056	0.0972	0.0975	0.2838	0.2927	0.2875	0.2999	0.2808	0.2729	0.0999	0.0996	0.1014	0.284	0.2979	0.2844
	0.2907	0.2909	0.3055	0.2961	0.294	0.2982	0.1011	0.104	0.0968	0.2952	0.2911	0.2913	0.2866	0.287	0.2804	0.1054	0.0972	0.0978	0.283	0.2938	0.2873	0.3001	0.2806	0.2824	0.1001	0.0998	0.1022	0.284	0.2973	0.2842
	0.2901	0.291	0.3056	0.2956	0.2939	0.2987	0.1011	0.1038	0.0972	0.2949	0.2909	0.291	0.2868	0.287	0.2799	0.1061	0.0971	0.0975	0.2837	0.2928	0.2866	0.3004	0.28	0.2722	0.1002	0.101	0.1016	0.283	0.2975	0.2842
	0.2895	0.2902	0.3046	0.295	0.2932	0.2973	0.1012	0.1041	0.097	0.2939	0.2903	0.2917	0.2862	0.2861	0.281	0.1048	0.0973	0.0976	0.2819	0.2923	0.2902	0.2986	0.2799	0.2711	0.1	0.1001	0.1016	0.2823	0.2968	0.2833
	0.2898	0.2899	0.3046	0.2975	0.2925	0.2973	0.1013	0.1037	0.0968	0.2939	0.2901	0.2902	0.2858	0.2867	0.2819	0.1051	0.0972	0.0978	0.2814	0.2914	0.2861	0.2983	0.2794	0.2706	0.1001	0.0995	0.1016	0.2821	0.296	0.2833
	0.2887	0.2895	0.3044	0.2944	0.2918	0.297	0.1011	0.1037	0.0968	0.2937	0.2896	0.2902	0.2848	0.2856	0.2788	0.105	0.097	0.0976	0.2812	0.2912	0.2889	0.2977	0.2788	0.2693	0.1001	0.0997	0.1017	0.2814	0.2958	0.2825
	0.2881	0.2893	0.304	0.2937	0.2918	0.2969	0.1014	0.104	0.0973	0.2927	0.2893	0.3059	0.2849	0.2853	0.2784	0.1046	0.0971	0.0978	0.2805	0.291	0.286	0.2969	0.2788	0.2699	0.0999	0.0996	0.103	0.2812	0.2959	0.2831
	0.2873	0.2889	0.3041	0.2933	0.2914	0.2961	0.101	0.1036	0.0968	0.2925	0.2891	0.2898	0.284	0.2849	0.2784	0.1045	0.0969	0.0977	0.2799	0.2914	0.2845	0.2967	0.278	0.2697	0.0998	0.0996	0.1015	0.2802	0.2951	0.2816
	0.2864	0.2882	0.304	0.2925	0.2917	0.2961	0.1009	0.1055	0.0968	0.2917	0.291	0.2887	0.2834	0.2842	0.2775	0.1044	0.097	0.0978	0.2793	0.2904	0.2845	0.2957	0.2776	0.2688	0.0998	0.0994	0.1012	0.2796	0.2946	0.281
	0.2862	0.2881	0.3028	0.2923	0.291	0.296	0.1009	0.1038	0.0966	0.2917	0.2883	0.2889	0.2827	0.2841	0.2782	0.1044	0.0968	0.0975	0.2789	0.2904	0.2844	0.2957	0.2772	0.2701	0.1	0.0997	0.1016	0.2792	0.2946	0.2811
	0.2863	0.2875	0.3034	0.2915	0.2905	0.2978	0.1011	0.1038	0.0969	0.2911	0.2892	0.2918	0.2822	0.2837	0.2768	0.1048	0.0971	0.0984	0.2791	0.2893	0.2838	0.2952	0.2767	0.2683	0.1003	0.0997	0.1017	0.279	0.294	0.2808
	0.2848	0.2874	0.3024	0.2913	0.2905	0.2954	0.1008	0.104	0.0969	0.2911	0.2875	0.289	0.2819	0.2831	0.2781	0.1044	0.0971	0.0977	0.278	0.2889	0.2835	0.2947	0.2761	0.2691	0.0999	0.0999	0.1017	0.2784	0.2937	0.2799
	0.2842	0.287	0.303	0.2919	0.2897	0.2946	0.1007	0.1034	0.0967	0.2902	0.2868	0.2871	0.2821	0.2826	0.2772	0.1042	0.0966	0.098	0.2771	0.2893	0.2827	0.2936	0.2756	0.2667	0.0996	0.0994	0.1012	0.2775	0.2933	0.2796
	0.2839	0.2889	0.3022	0.2904	0.2892	0.3024	0.1012	0.1038	0.0966	0.2902	0.2866	0.2866	0.2807	0.2825	0.2761	0.1044	0.0969	0.0987	0.2768	0.2884	0.2829	0.2931	0.2749	0.2694	0.0998	0.0997	0.1014	0.2778	0.2928	0.2794
	0.2836	0.287	0.3015	0.2905	0.2892	0.2935	0.1012	0.1035	0.097	0.2898	0.2864	0.2865	0.2803	0.2822	0.2768	0.1045	0.097	0.0975	0.2768	0.2886	0.2834	0.2931	0.2754	0.2664	0.0998	0.0996	0.1017	0.277	0.2928	0.2795
